# Supplementary material (part 1 of 2)
Source: ML conference proceedings conference paper supplement (https://openreview.net/forum?id=hr9Bd1A9Un)

Hexagonal (2), 1200K, (Hf-Hf)

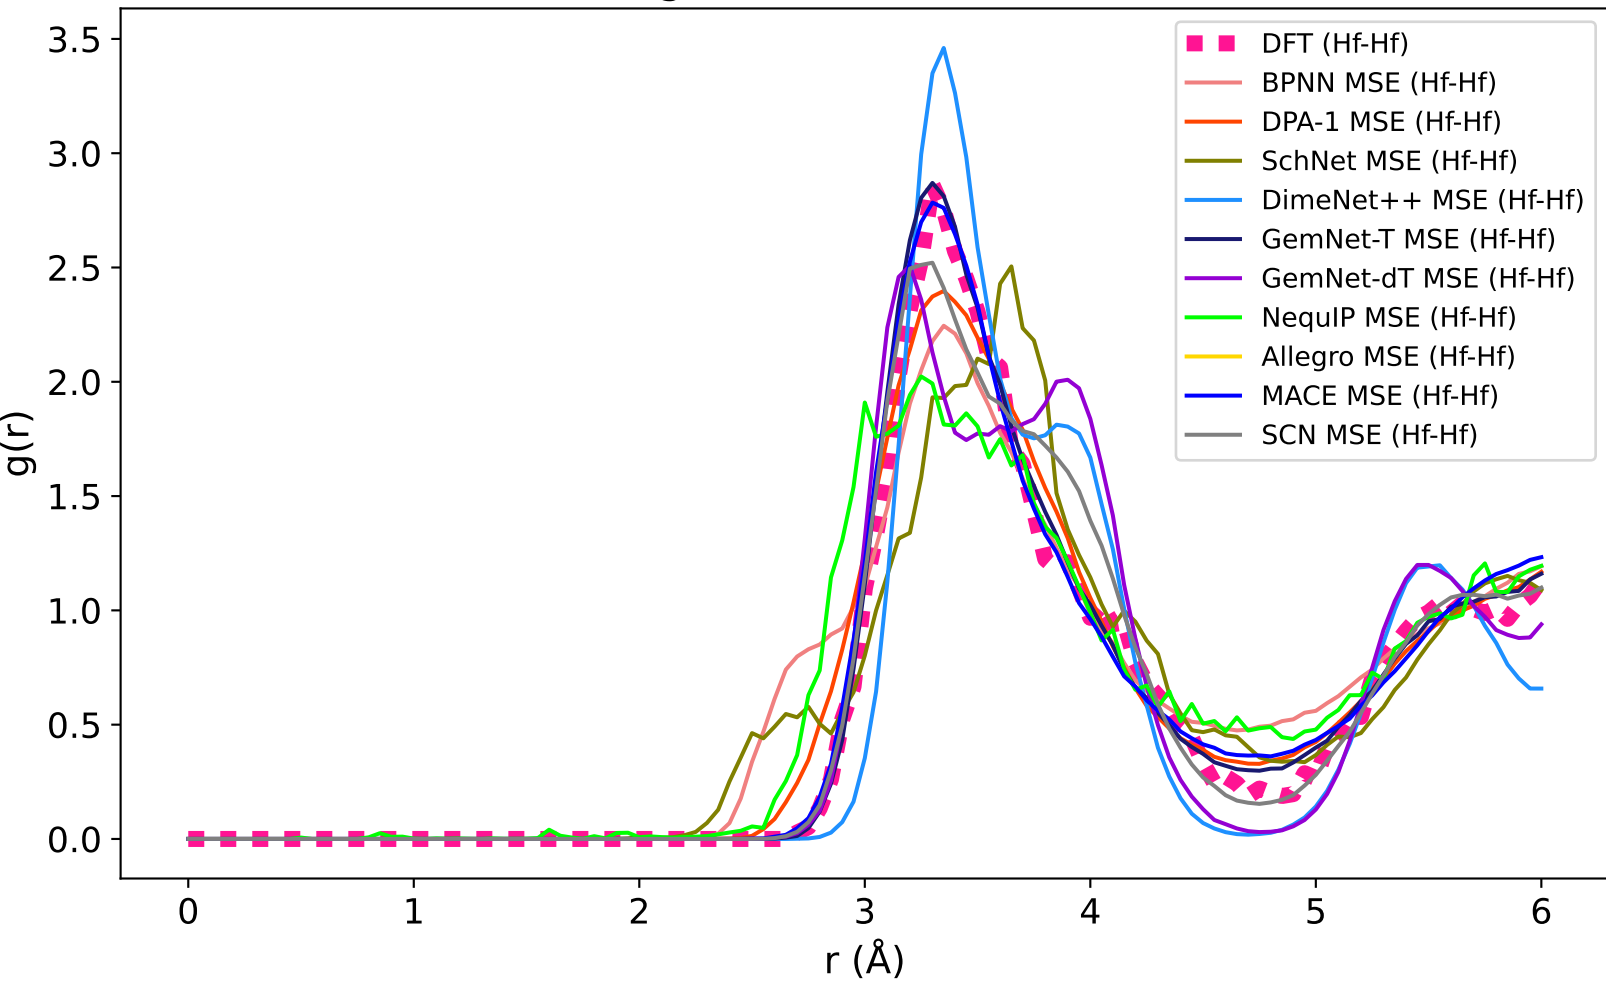

Supplement: supplementary_material [file attachment]

## Tetragonal, 1200K, (O-O)

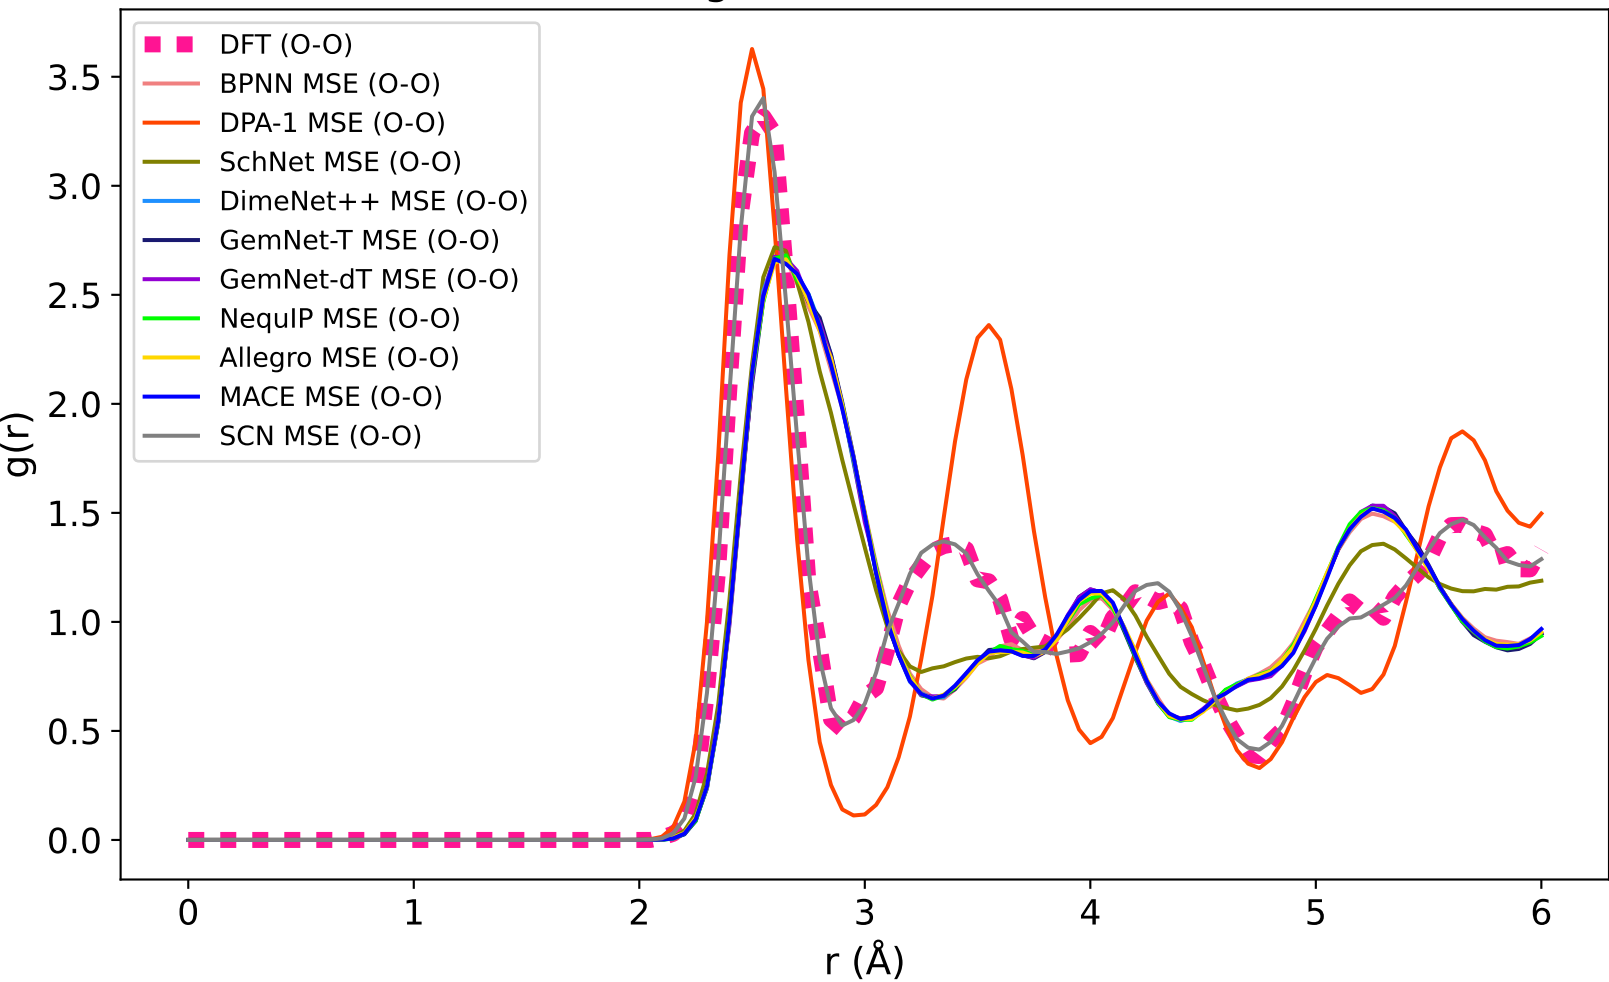

Supplement: supplementary_material [file attachment]

Amorphous, 1200K, (Si-Si)

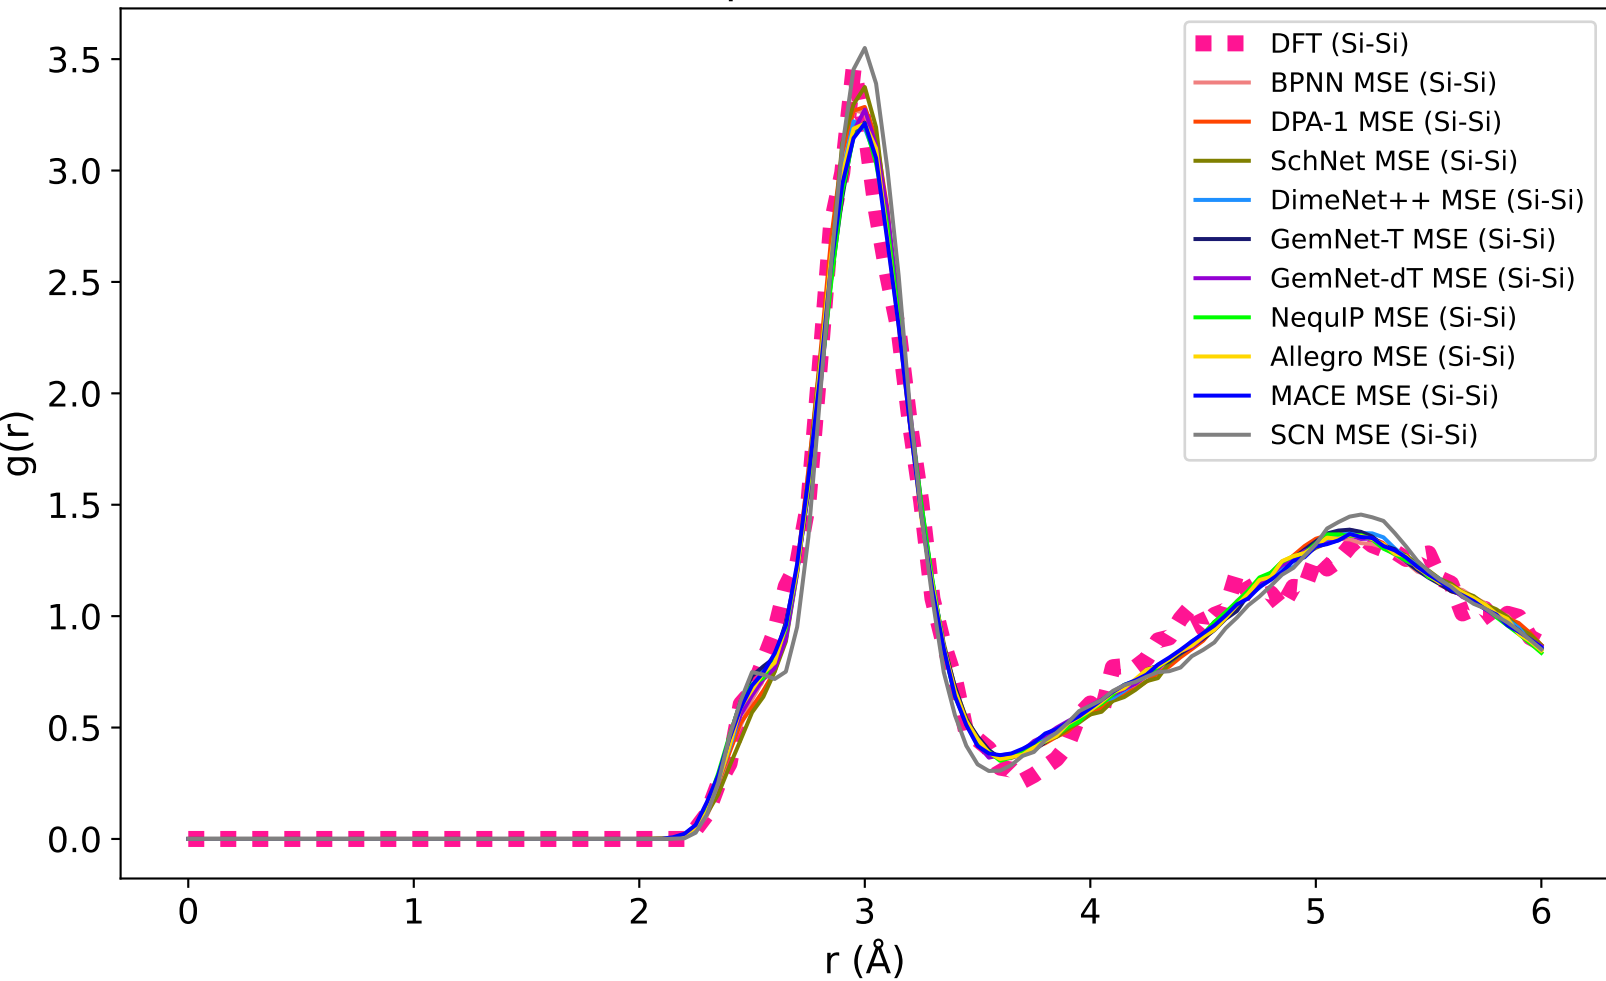

Supplement: supplementary_material [file attachment]

Tetragonal, 1800K, (Hf-O)

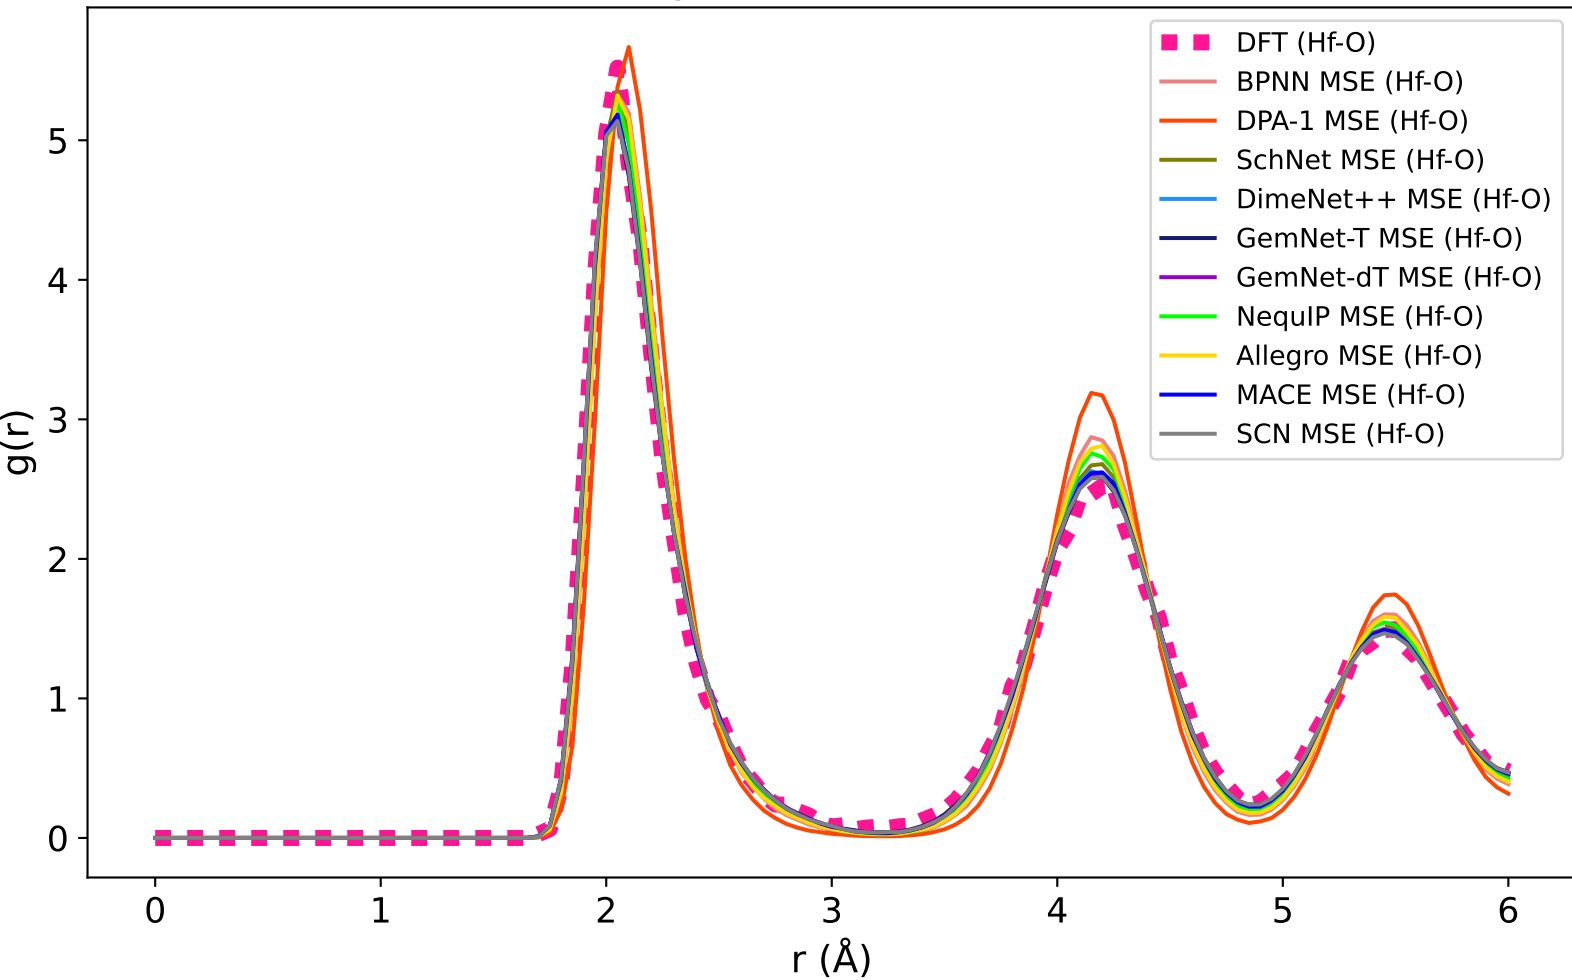

Supplement: supplementary_material [file attachment]

Cubic (2), 1200K, (Si-Si)

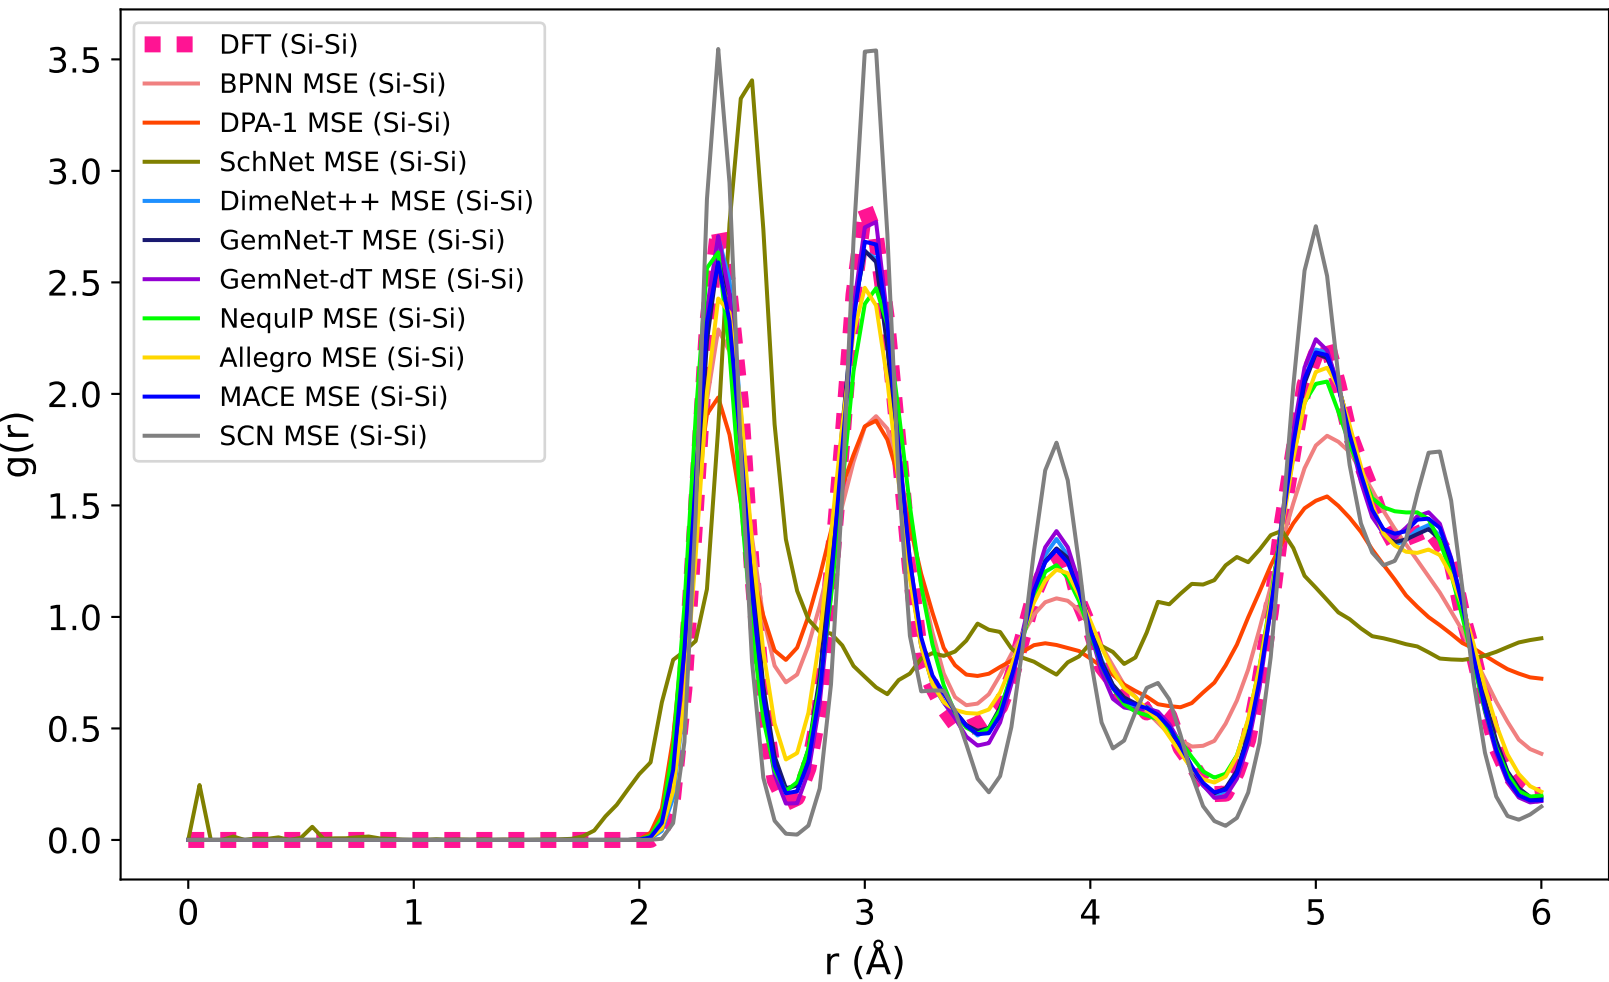

Supplement: supplementary_material [file attachment]

P4<sub>2</sub>/nmc, 96 atoms

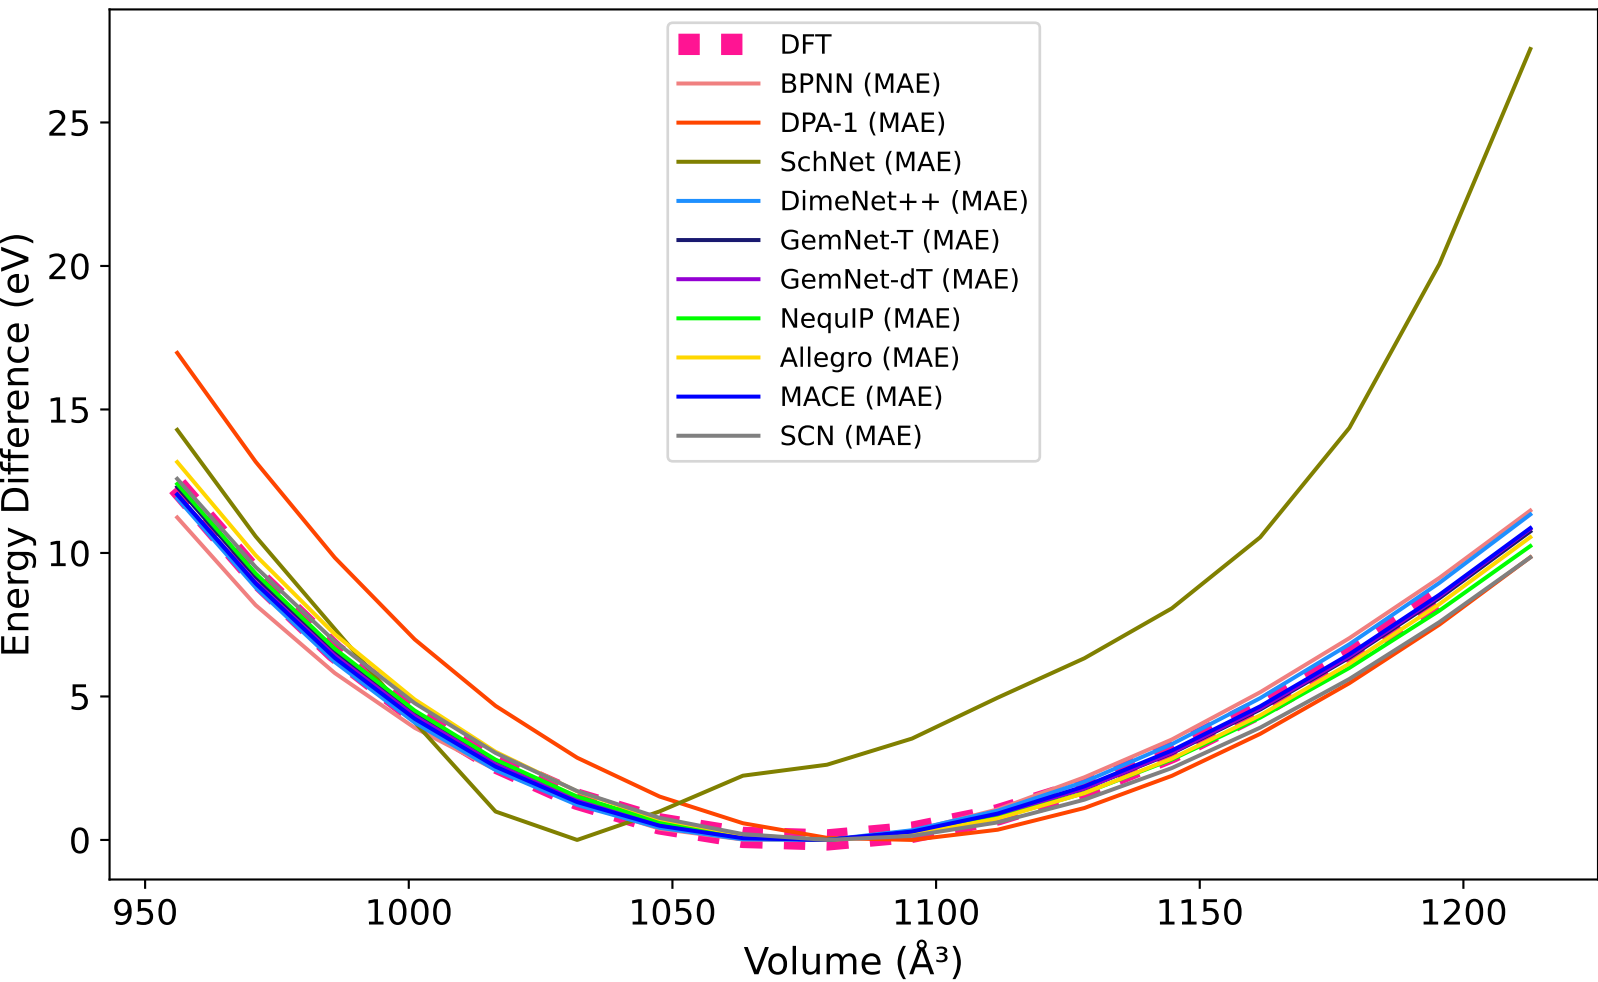

Supplement: supplementary_material [file attachment]

# Monoclinic, 1200K, (O-O)

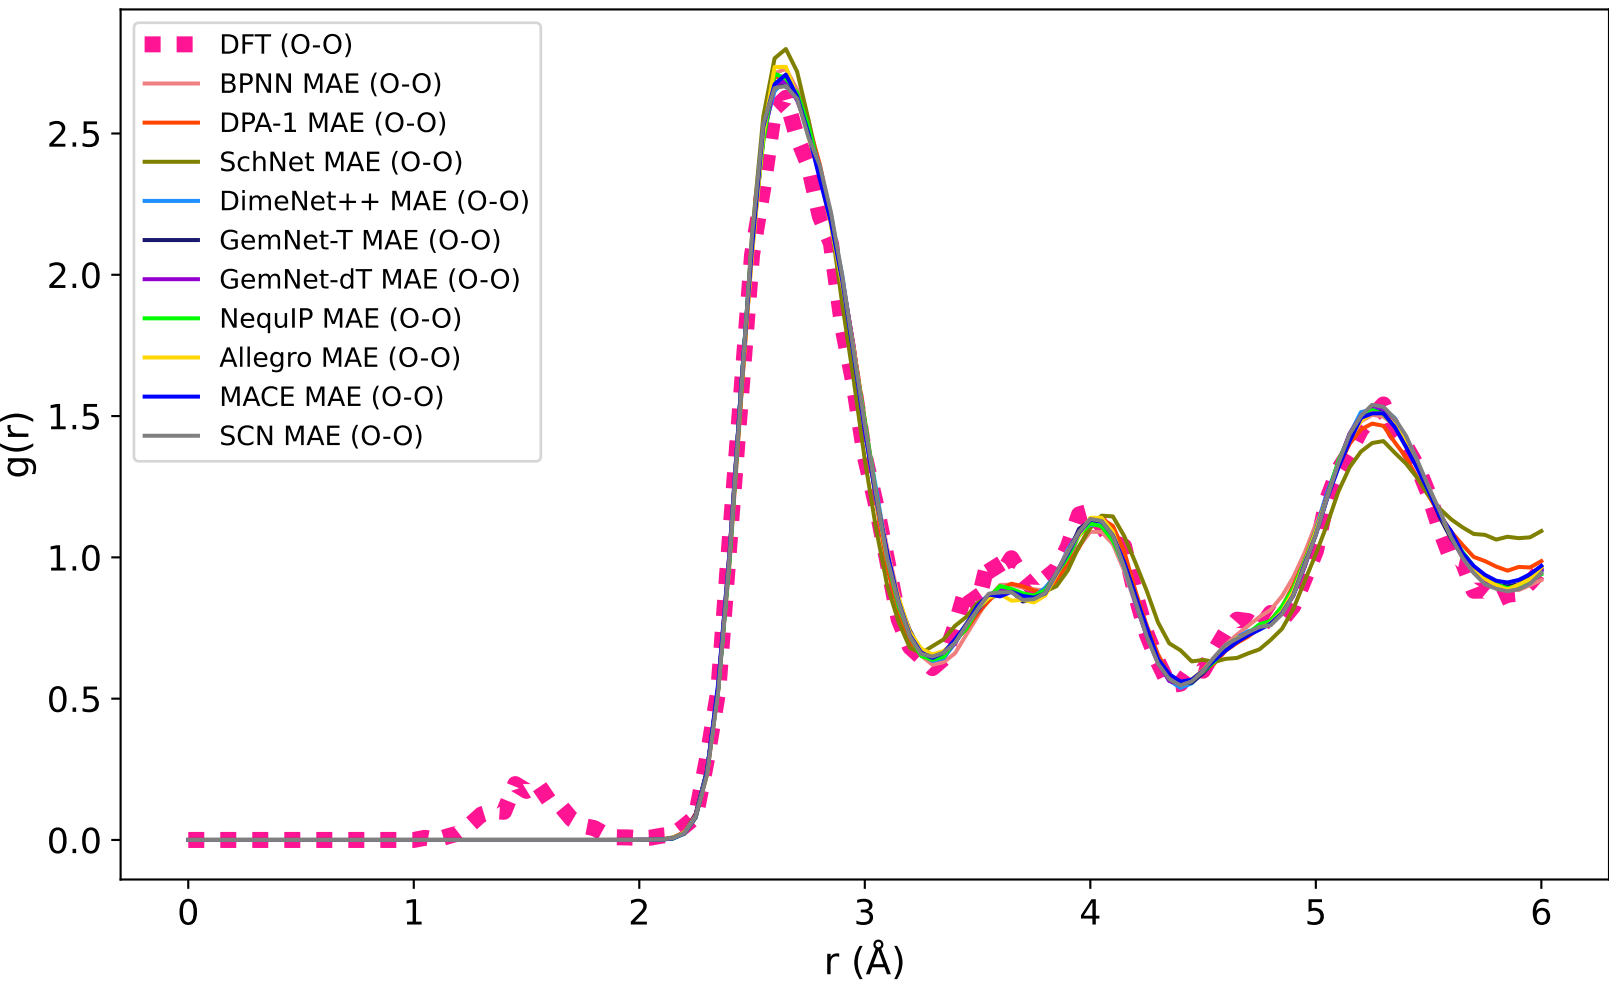

Supplement: supplementary_material [file attachment]

Monoclinic, 1800K, (Hf-O)

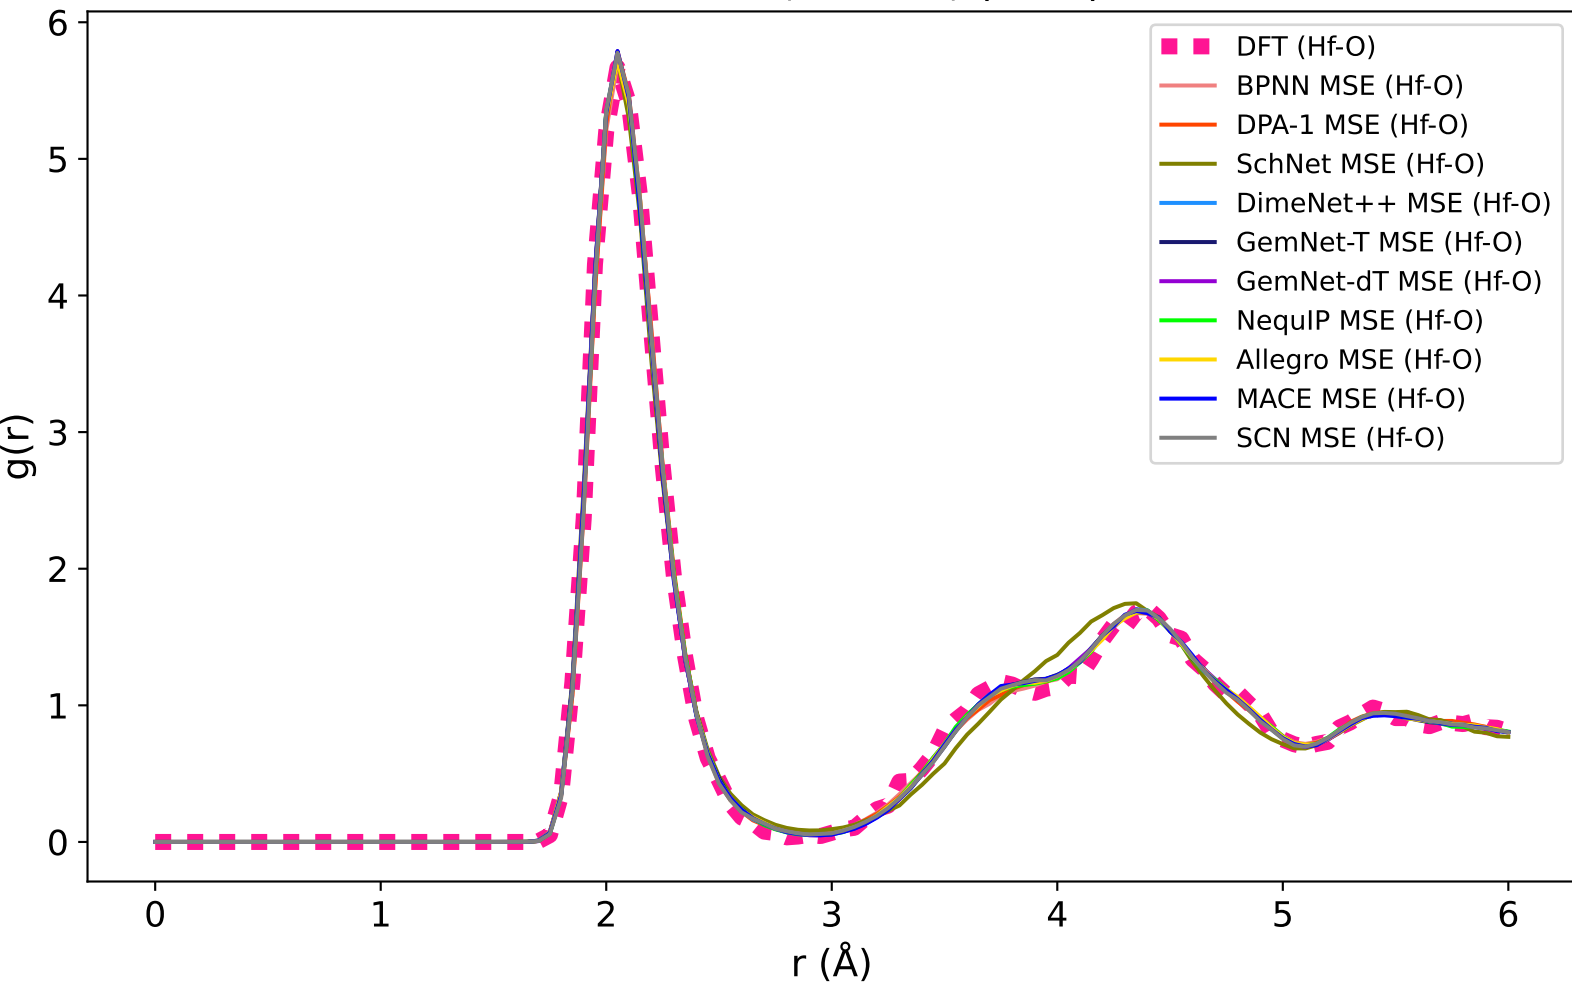

Supplement: supplementary_material [file attachment]

# Fd3m, 14 atoms

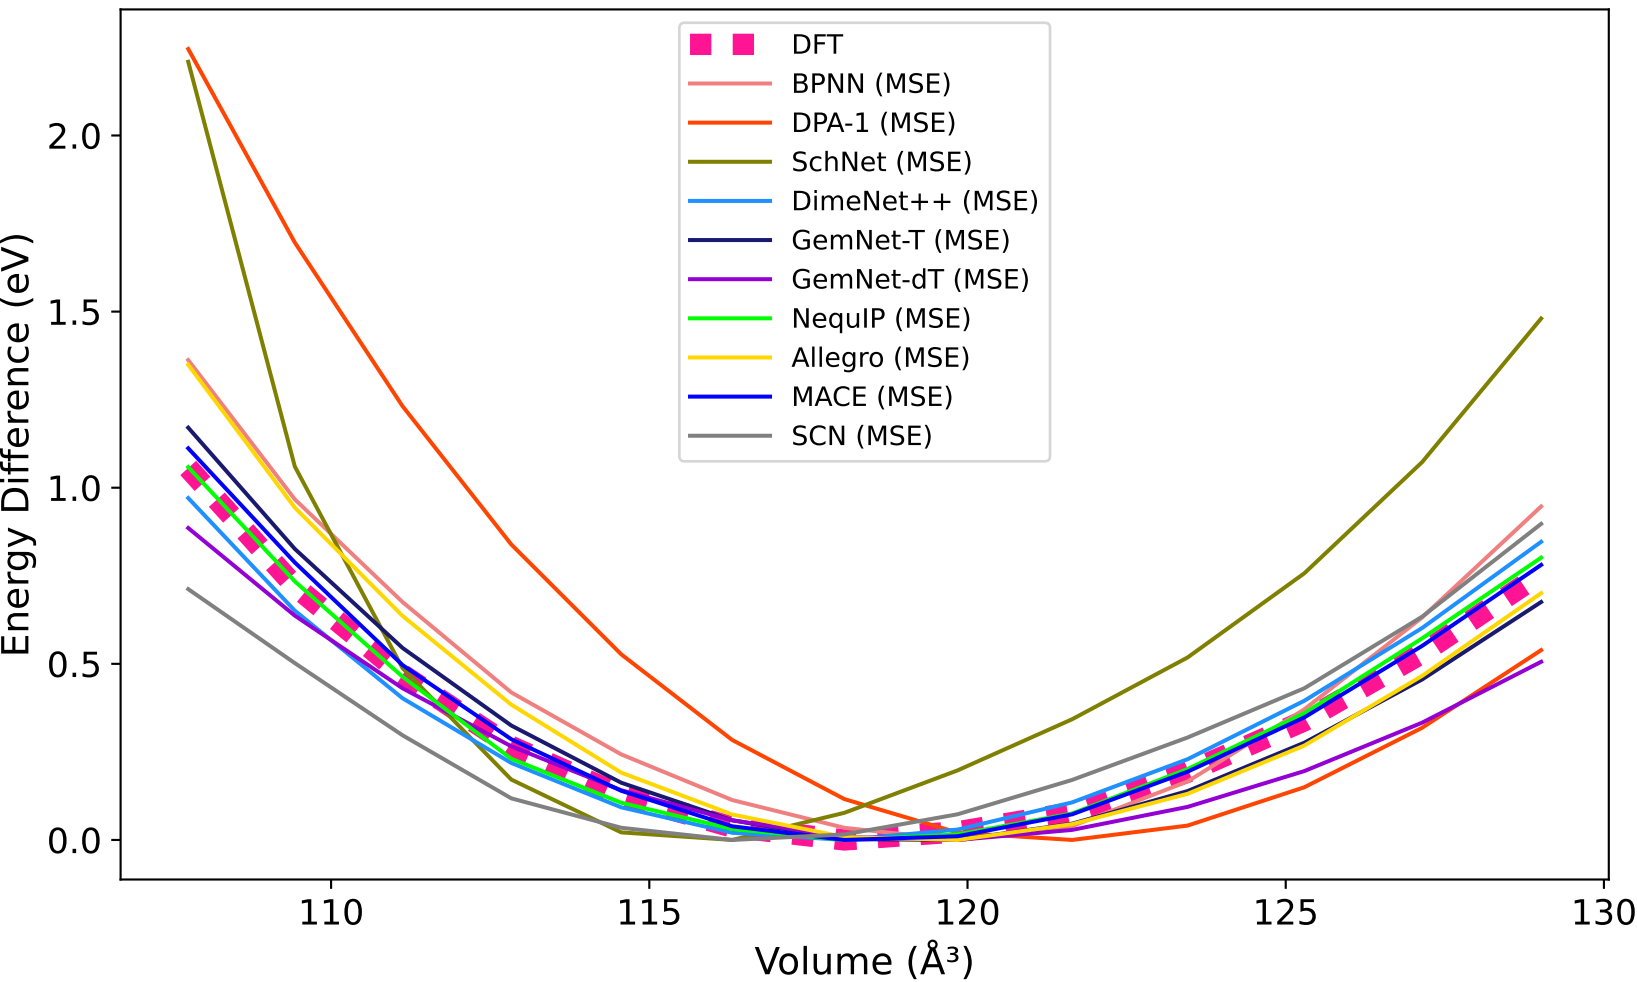

Supplement: supplementary_material [file attachment]

Cubic (2), 1200K, (Hf-O)

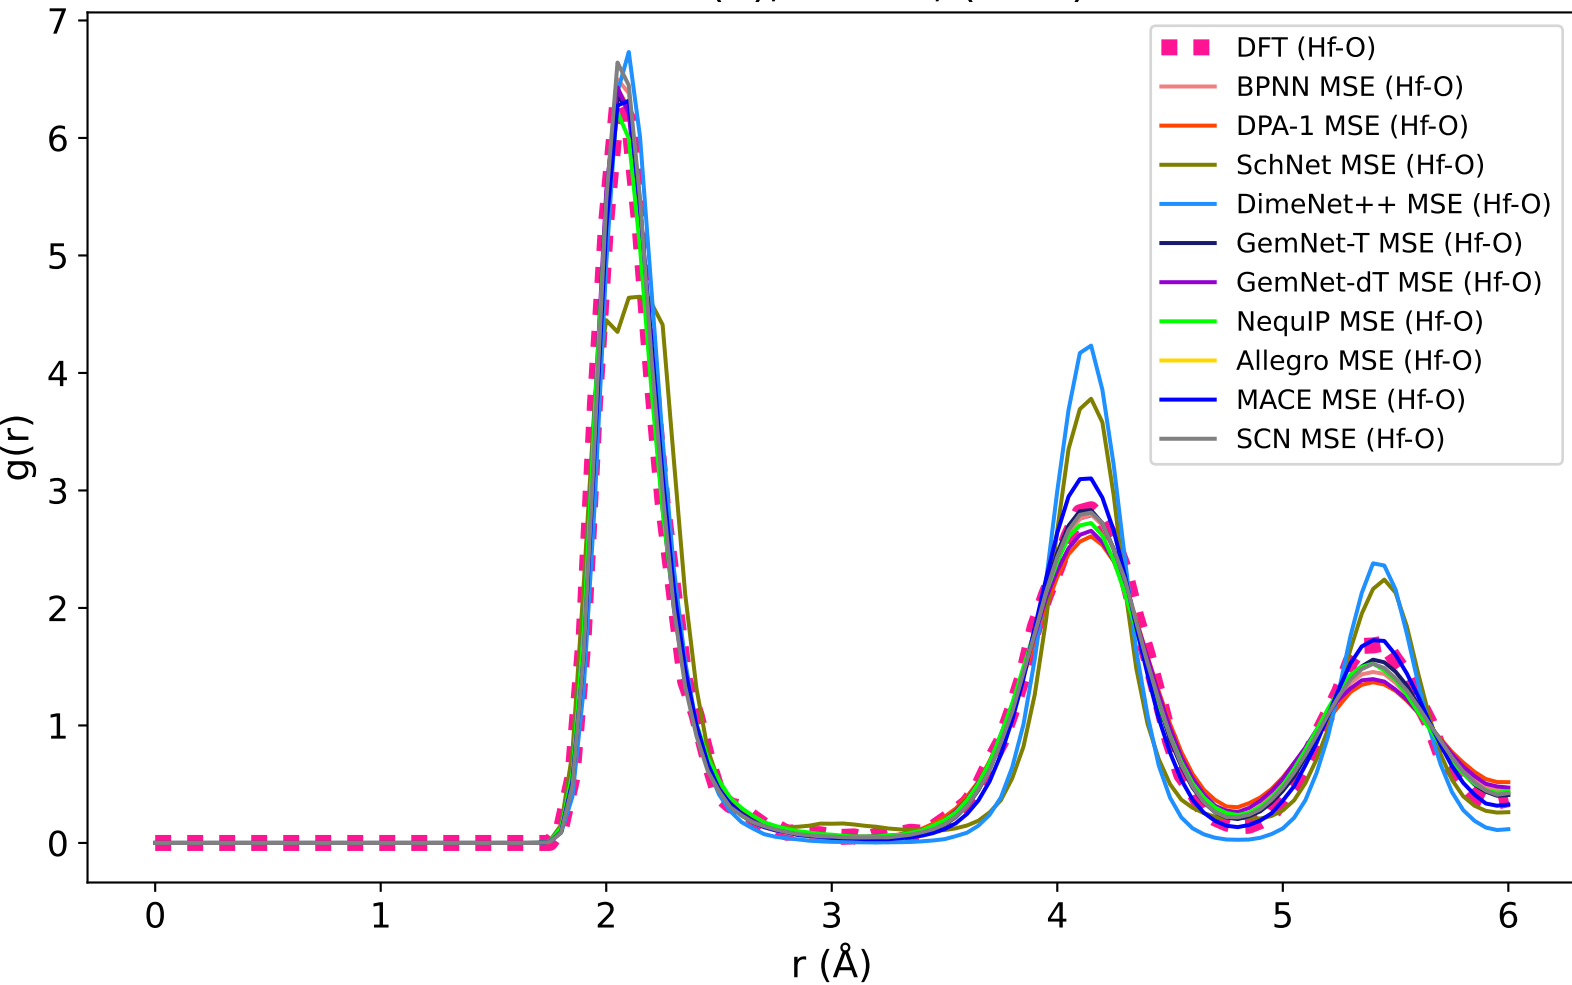

Supplement: supplementary_material [file attachment]

# P31c, 28 atoms

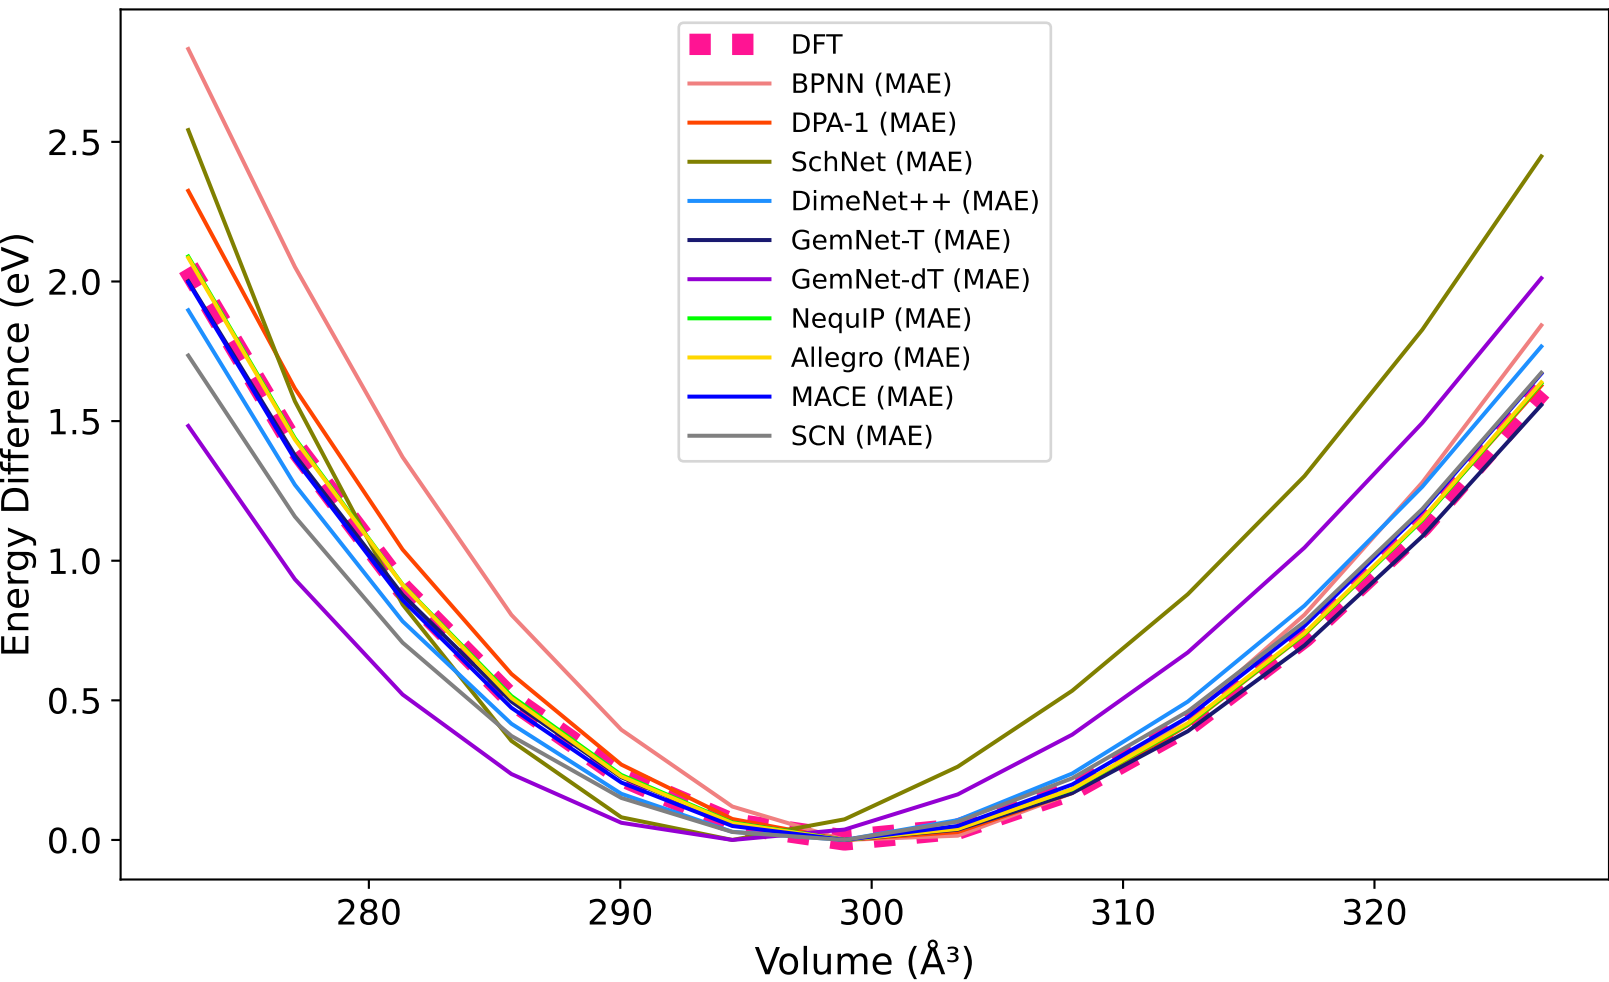

Supplement: supplementary_material [file attachment]

# Amorphous, 1200K, (Si-N)

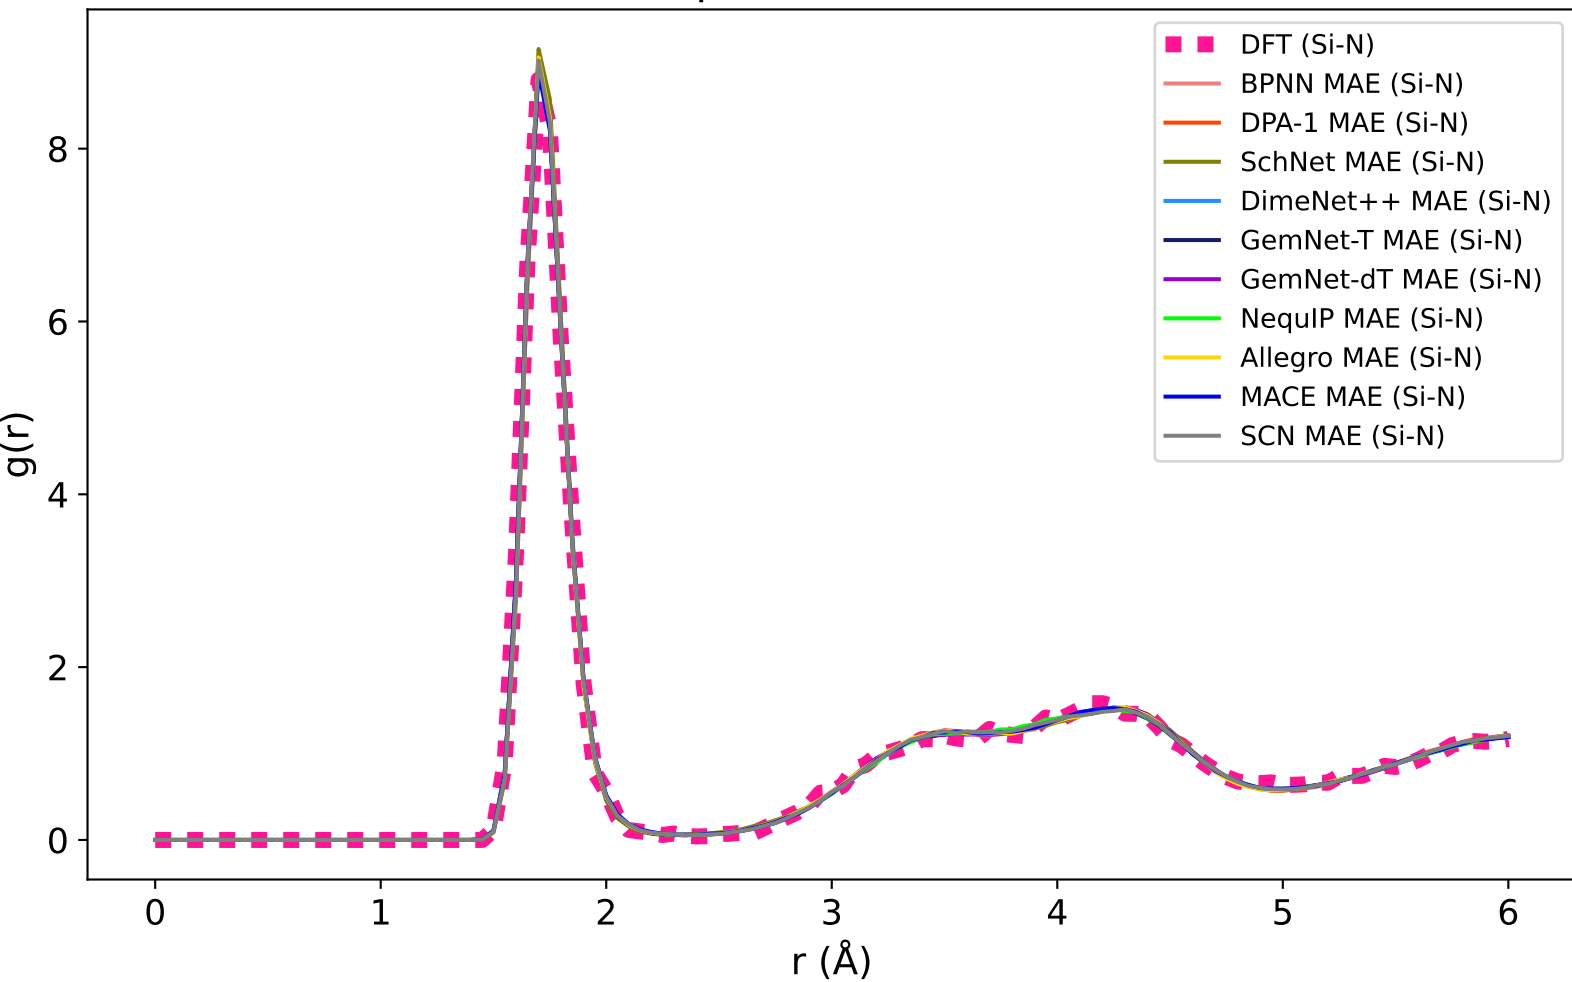

Supplement: supplementary_material [file attachment]

Cubic (1), 1200K, (Si-N)

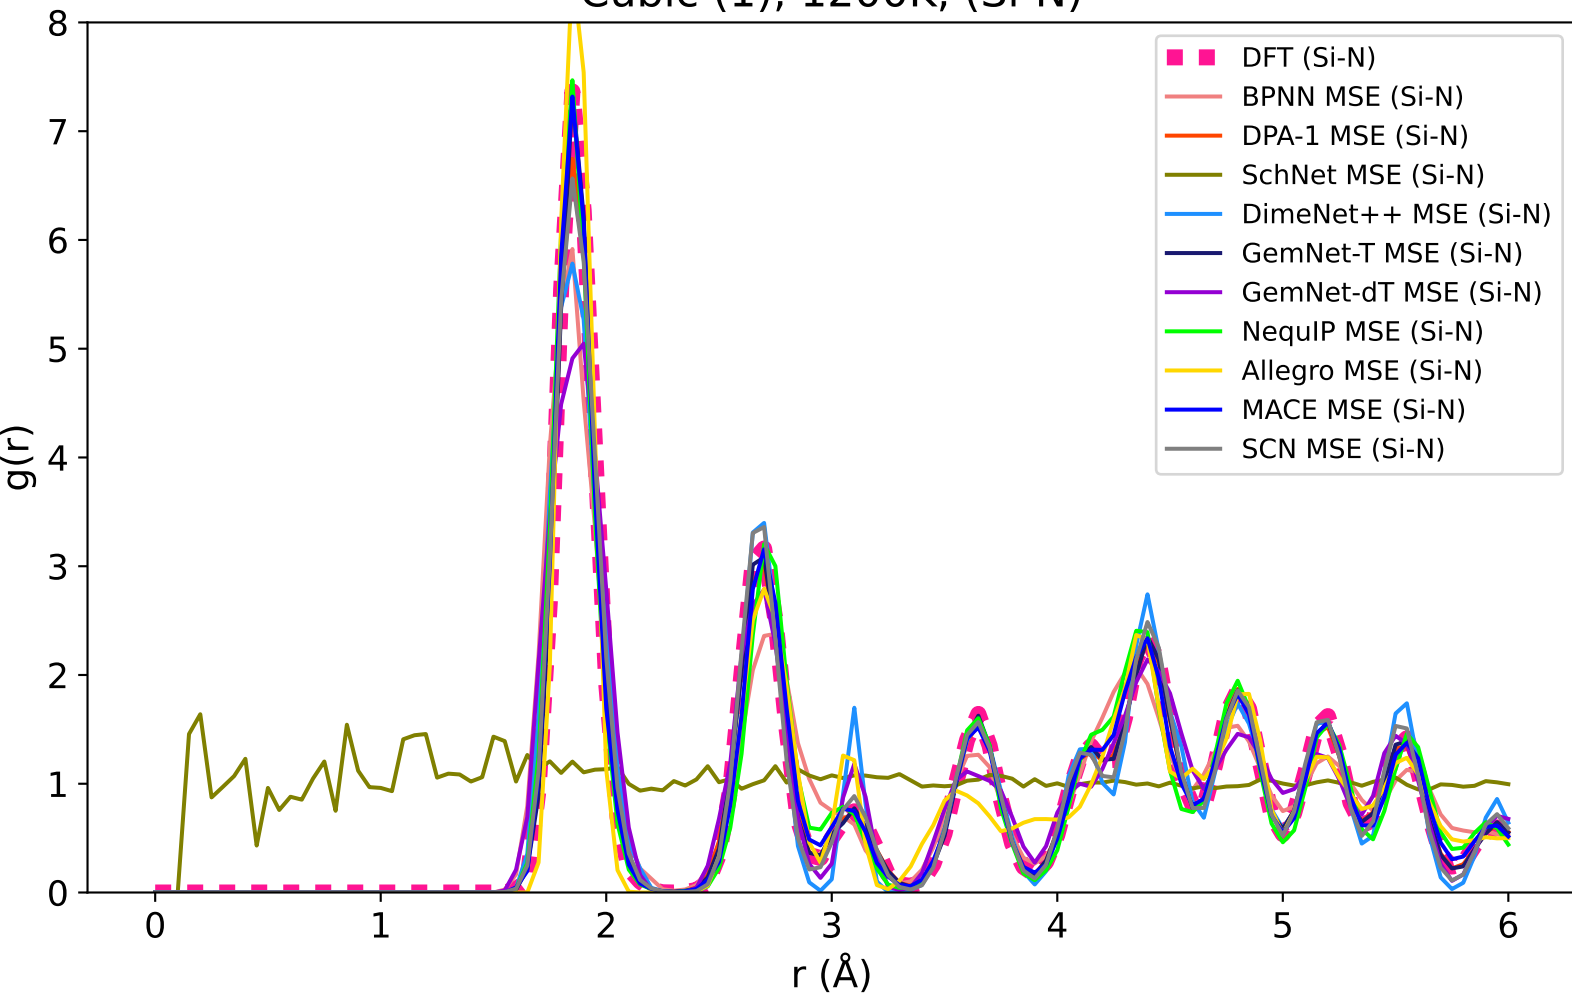

Supplement: supplementary_material [file attachment]

Amorphous, 1200K, (N-N)

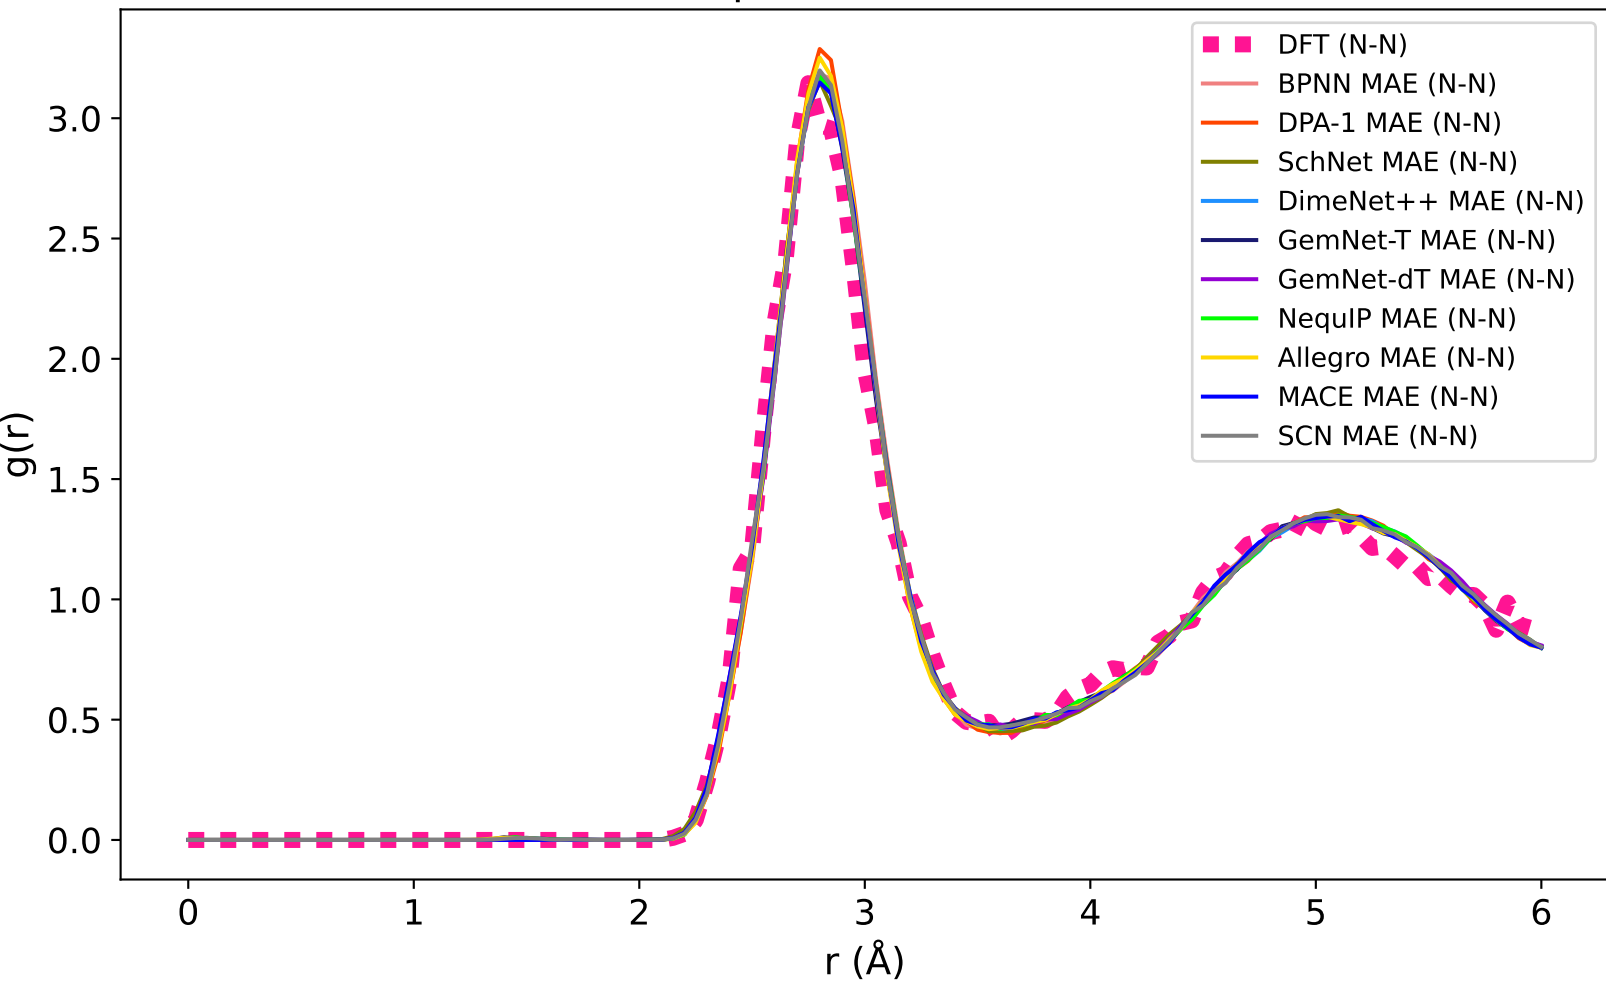

Supplement: supplementary_material [file attachment]

Cubic (1), 1200K, (O-O)

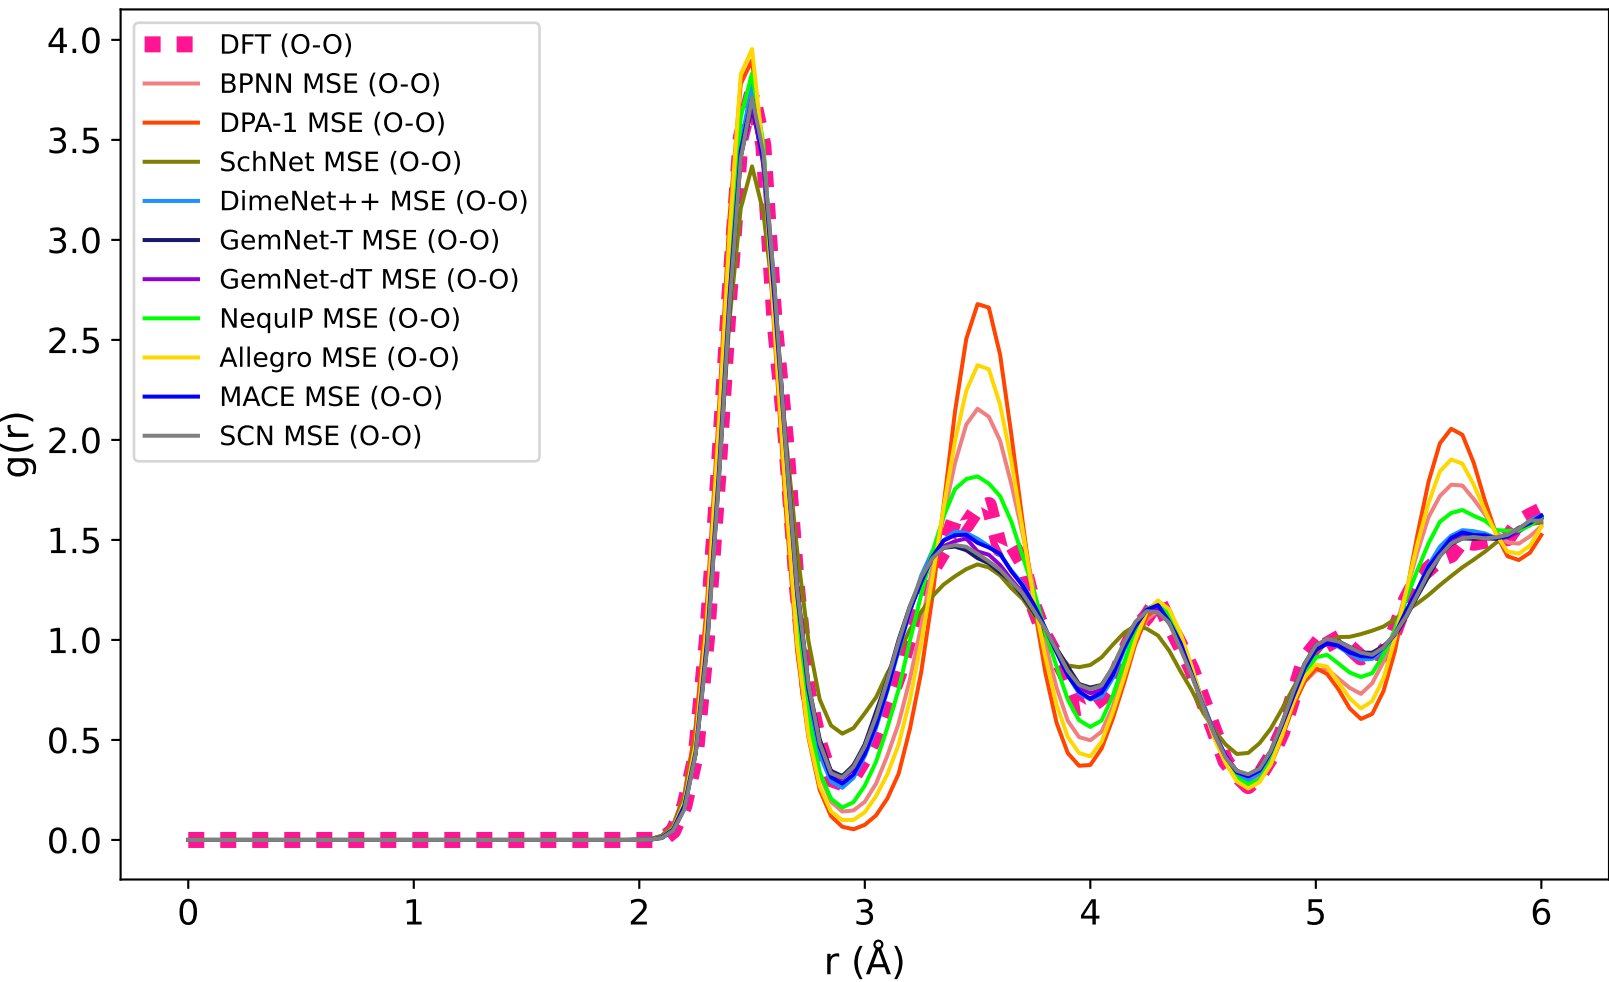

Supplement: supplementary_material [file attachment]

Orthorhombic (1), 1800K, (Hf-Hf)

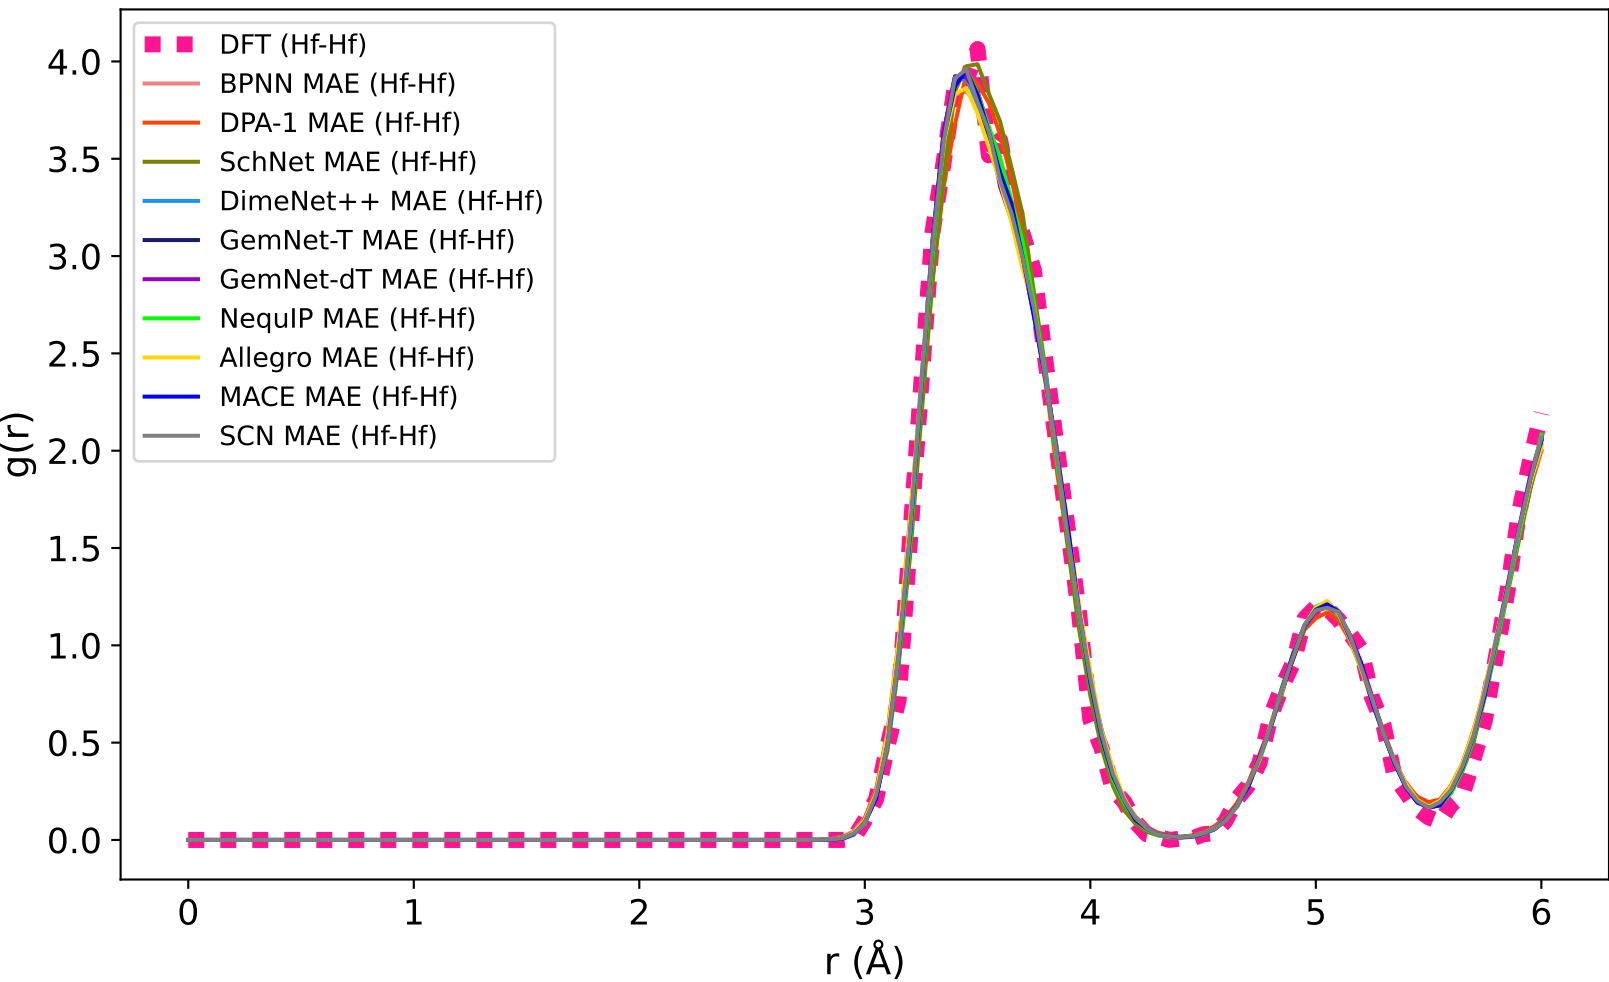

Supplement: supplementary_material [file attachment]

Hexagonal (1), 1200K, (O-O)

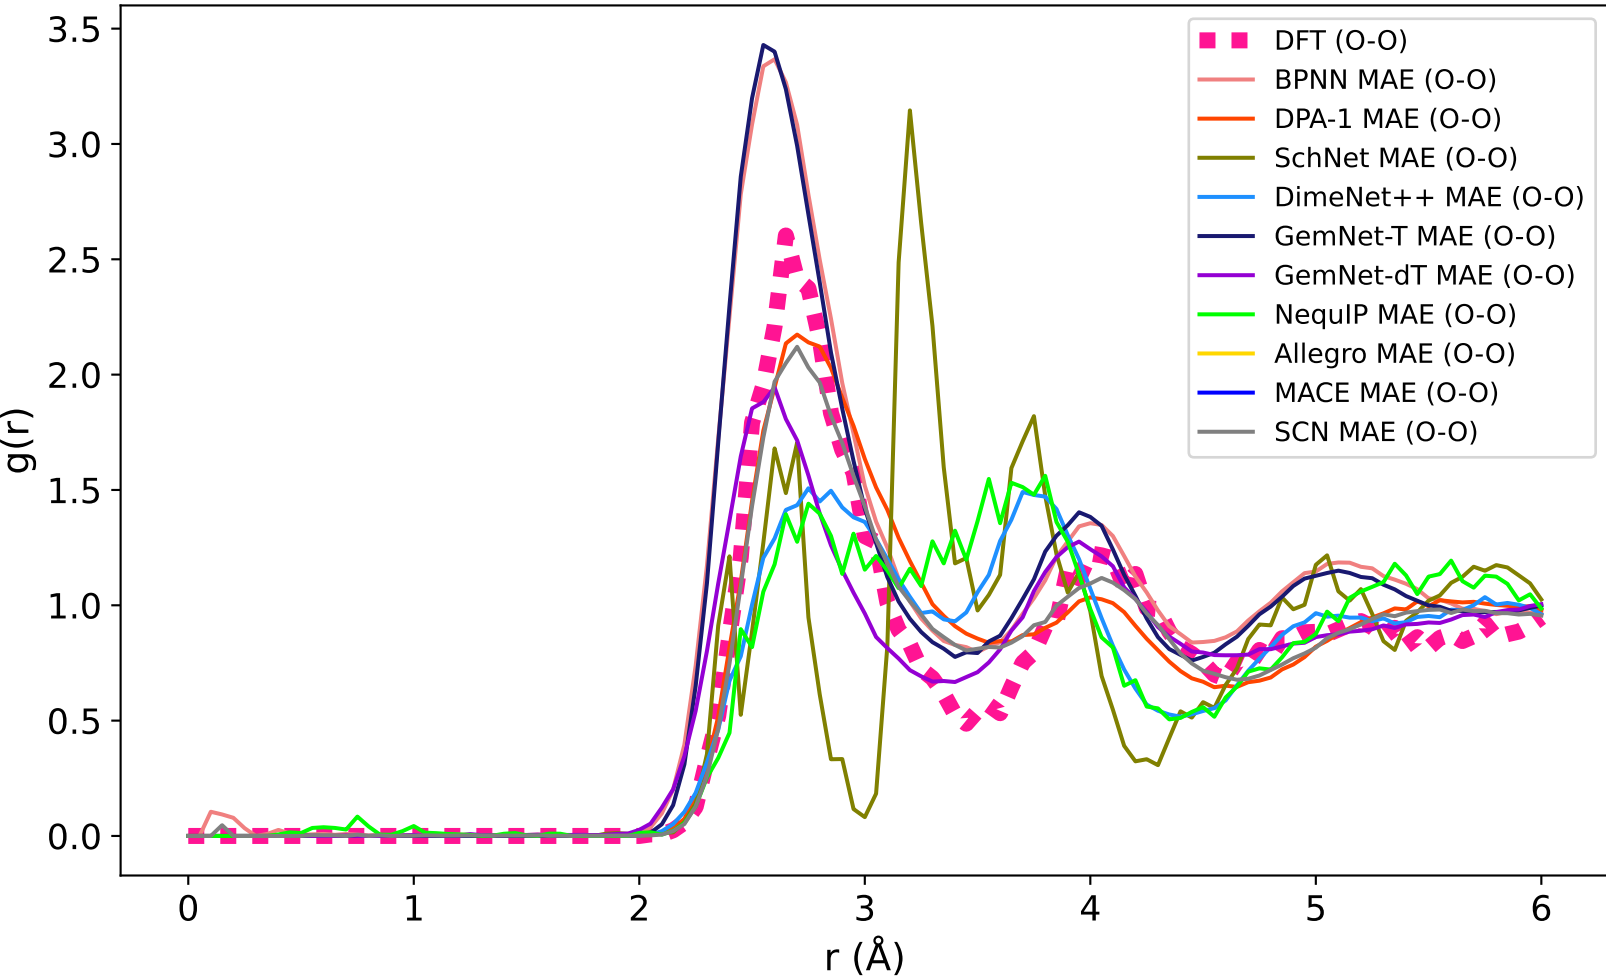

Supplement: supplementary_material [file attachment]

Cubic (1), 1200K, (O-O)

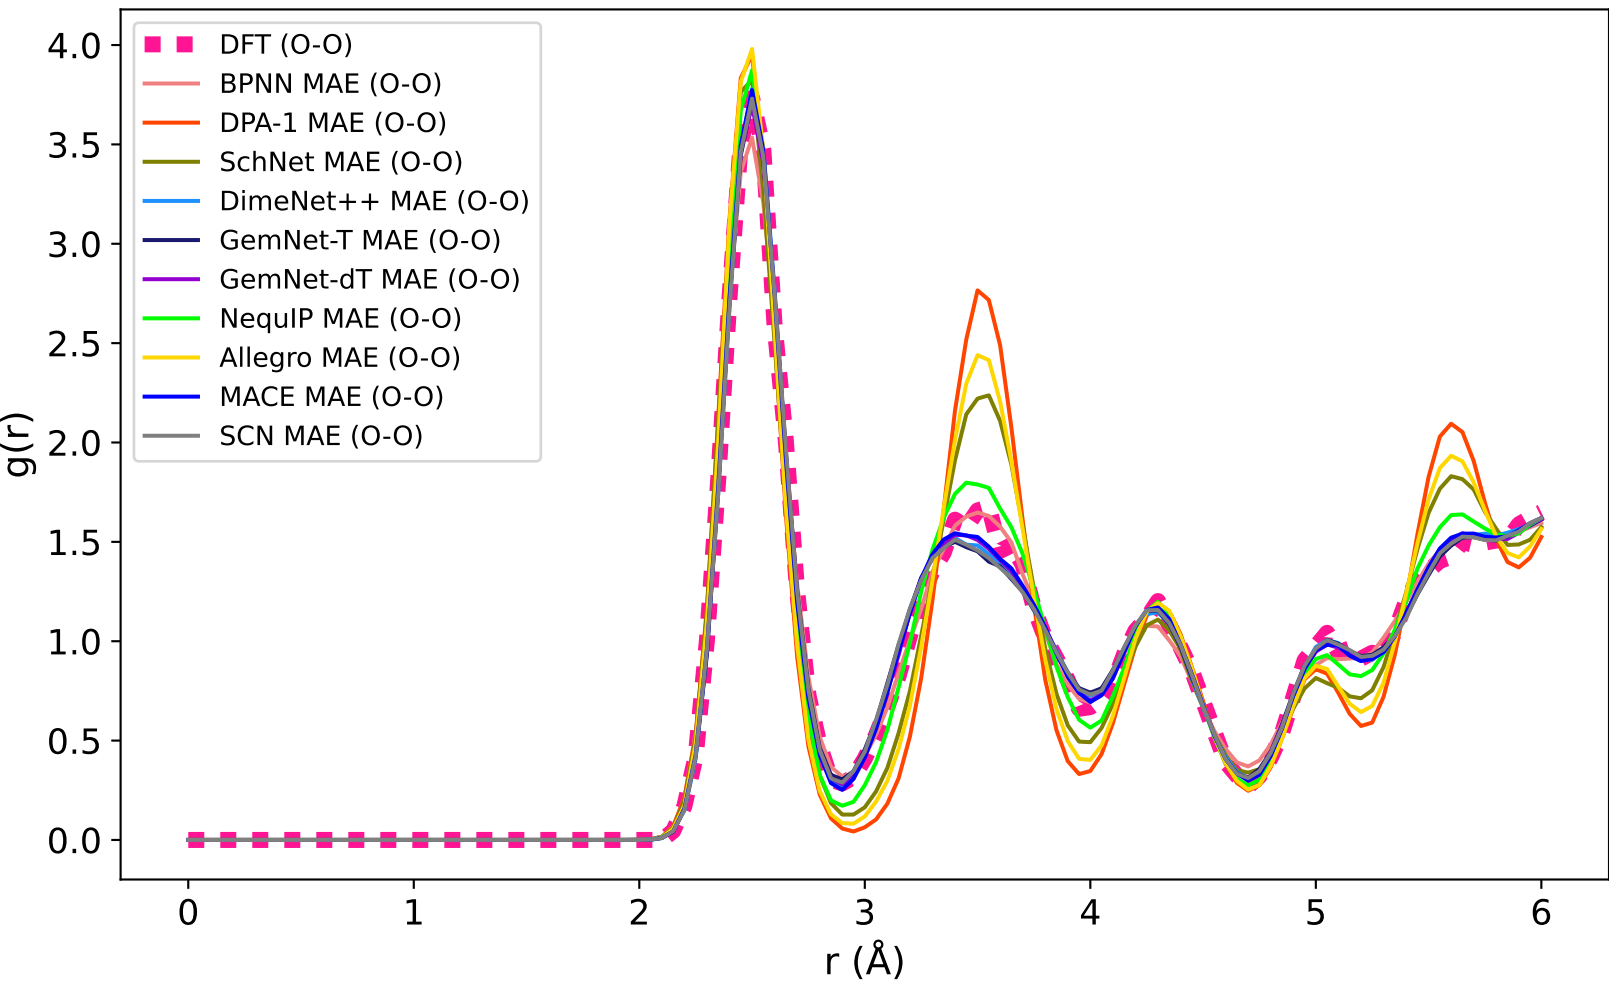

Supplement: supplementary_material [file attachment]

# Orthorhombic (2), 1800K, (Hf-O)

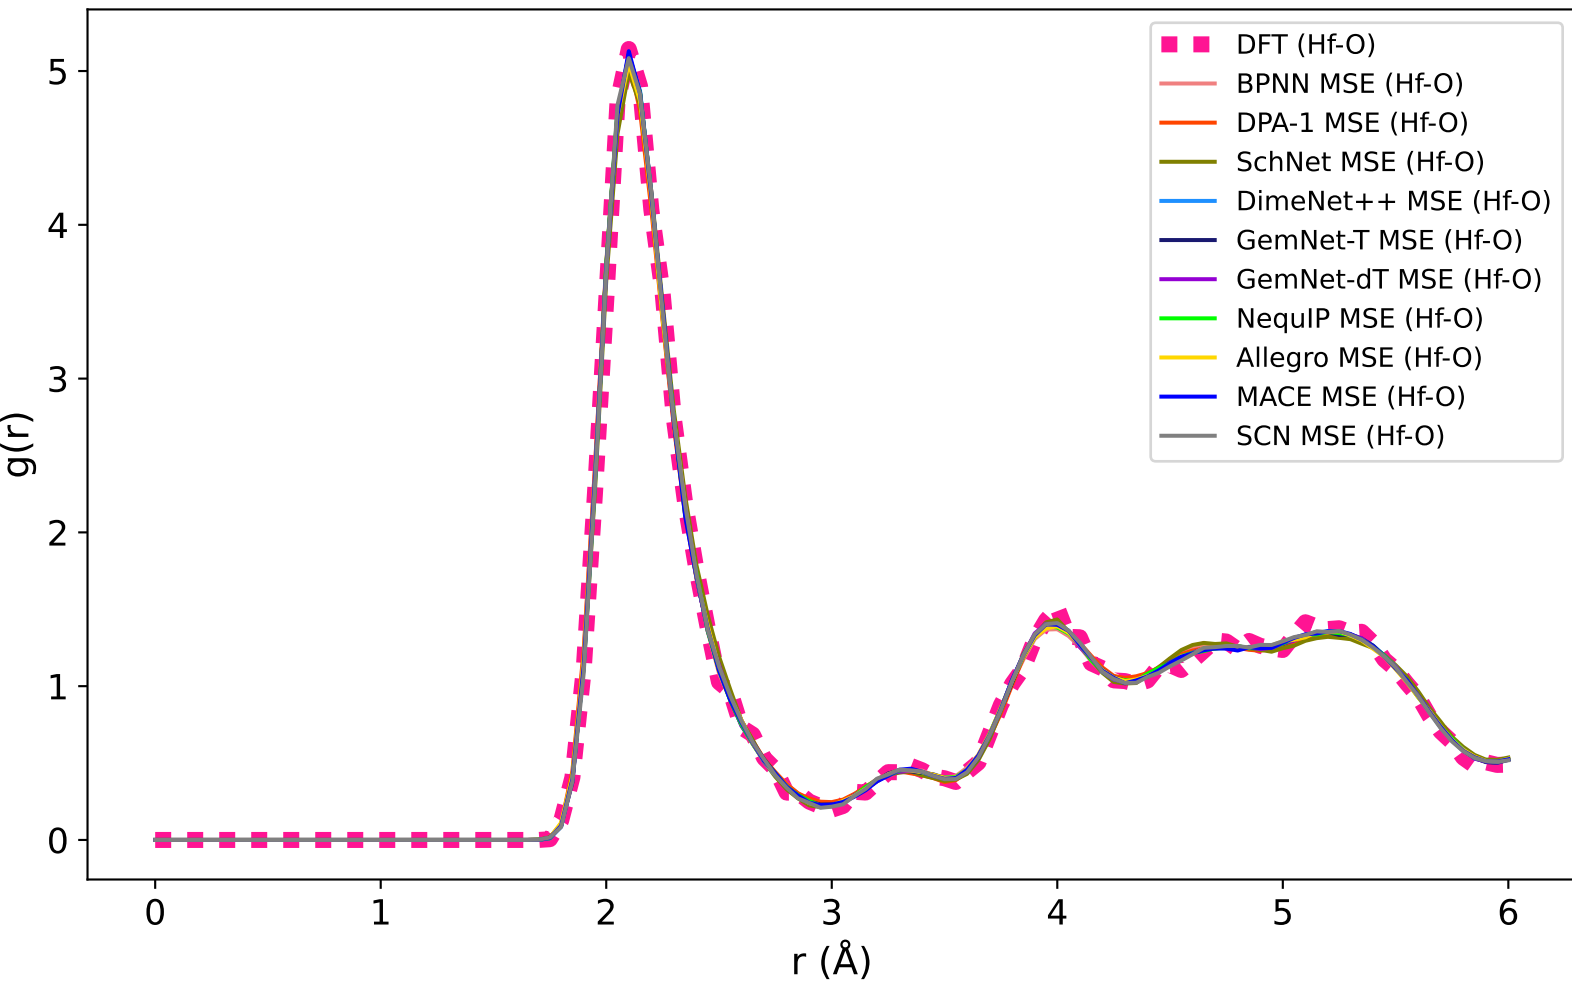

Supplement: supplementary_material [file attachment]

# Fd3m, 14 atoms

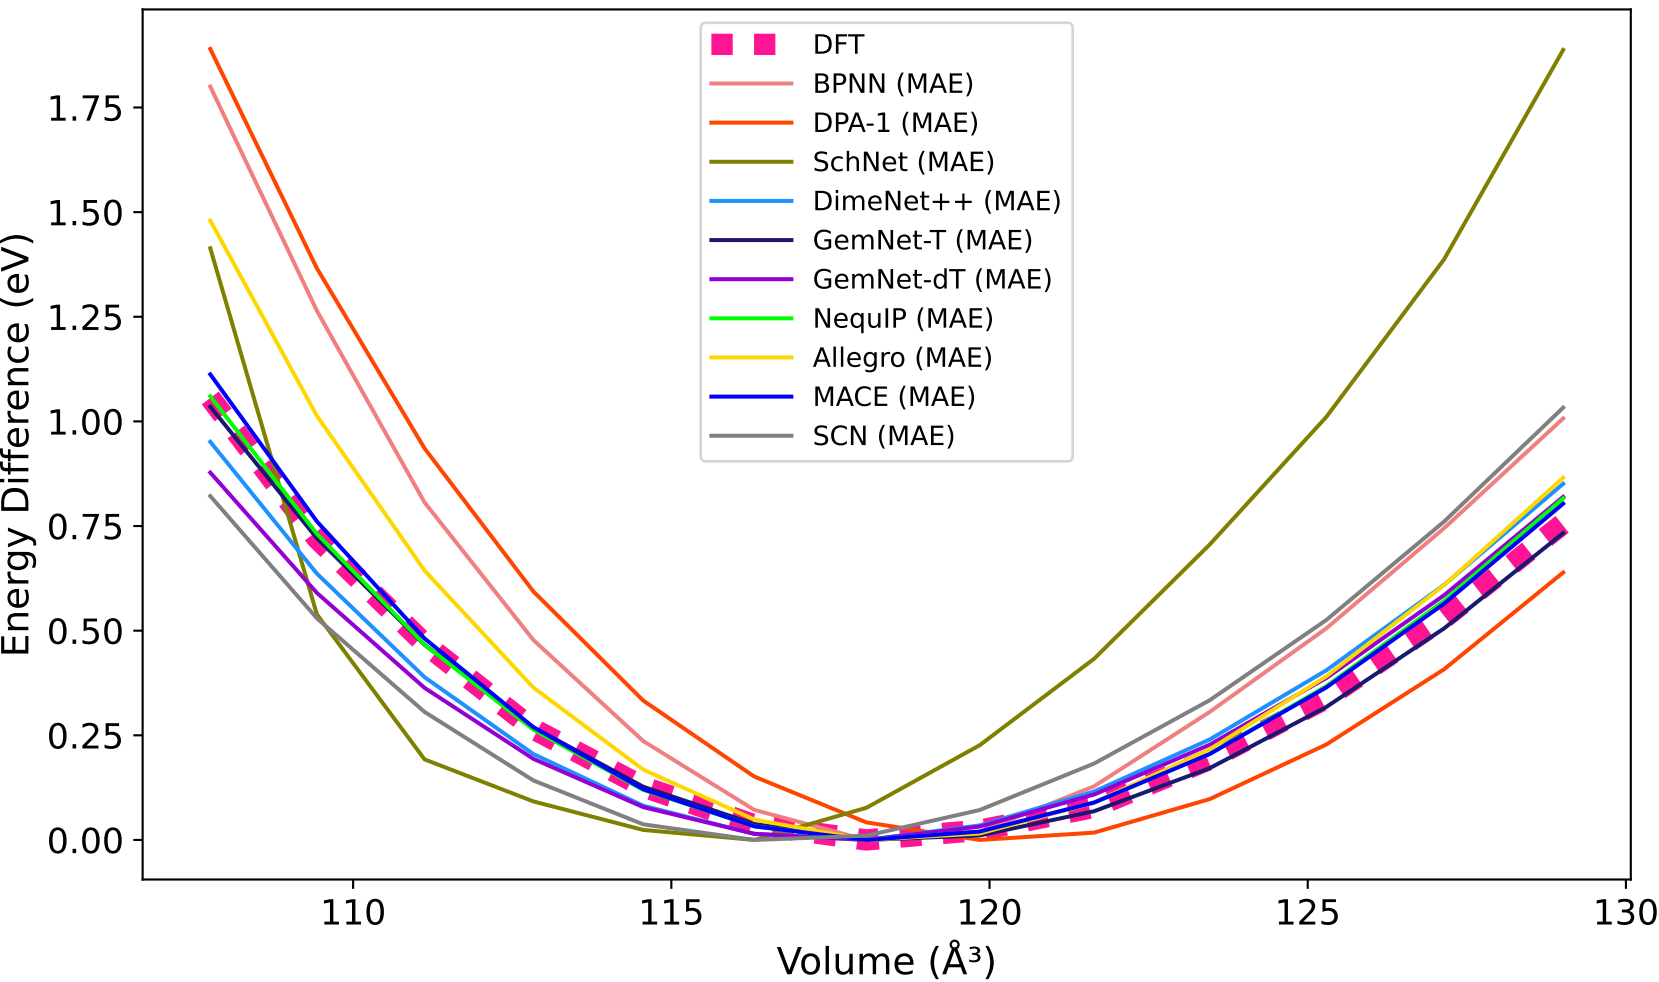

Supplement: supplementary_material [file attachment]

Tetragonal, 1800K, (Hf-Hf)

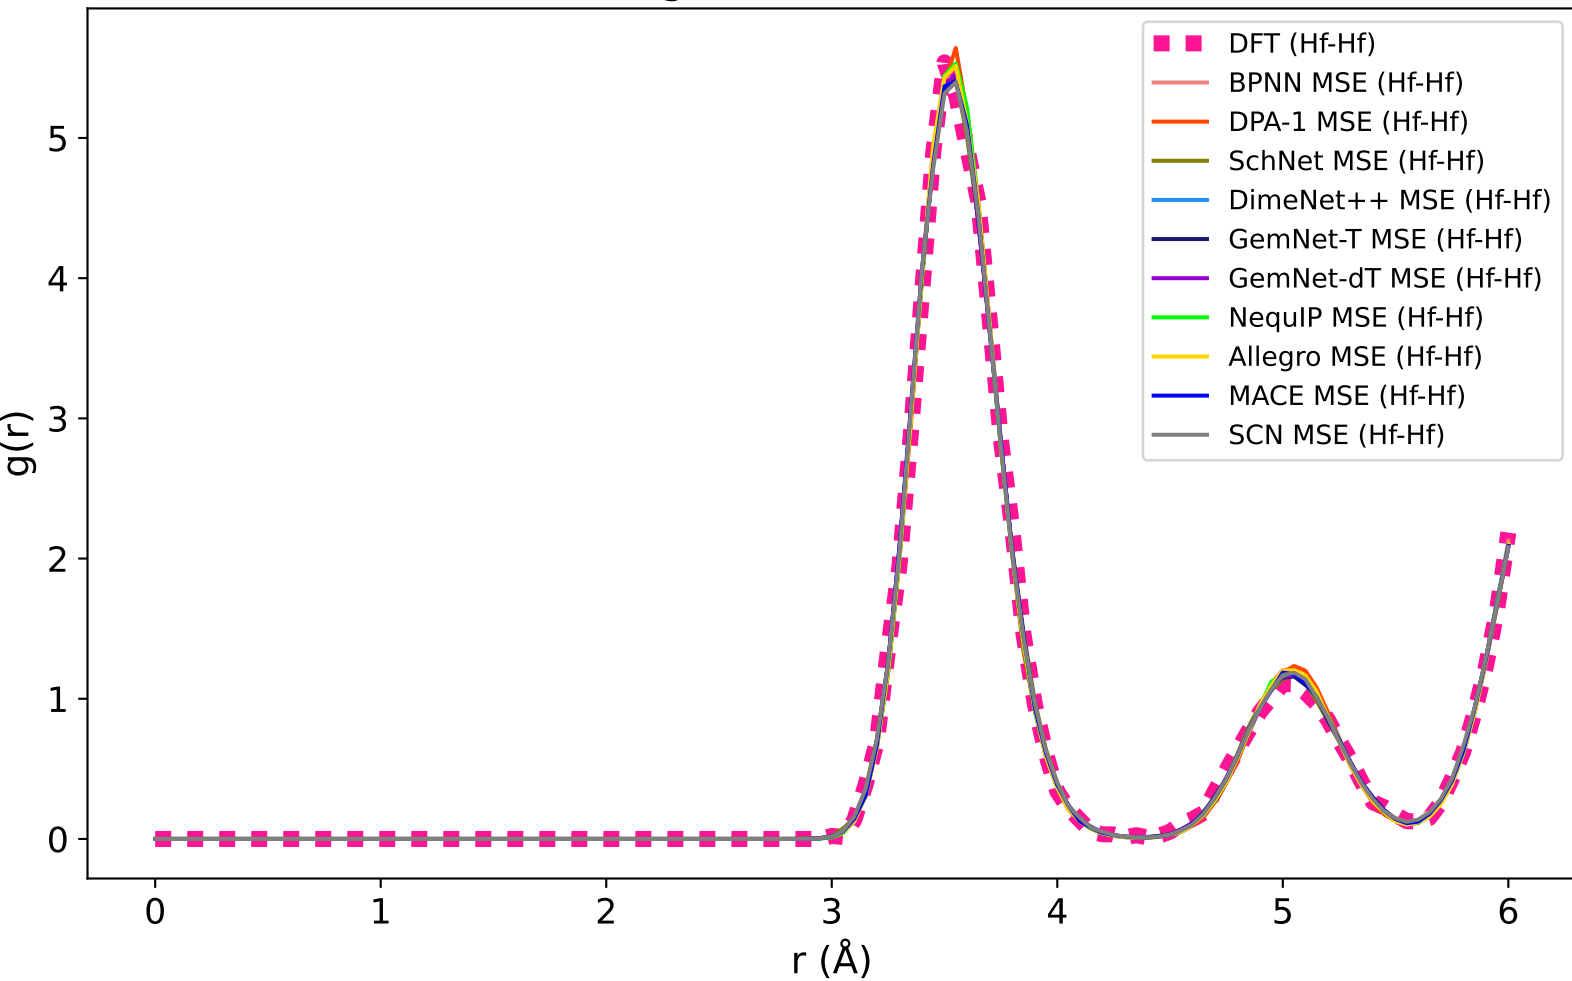

Supplement: supplementary_material [file attachment]

Cubic (1), 1800K, (O-O)

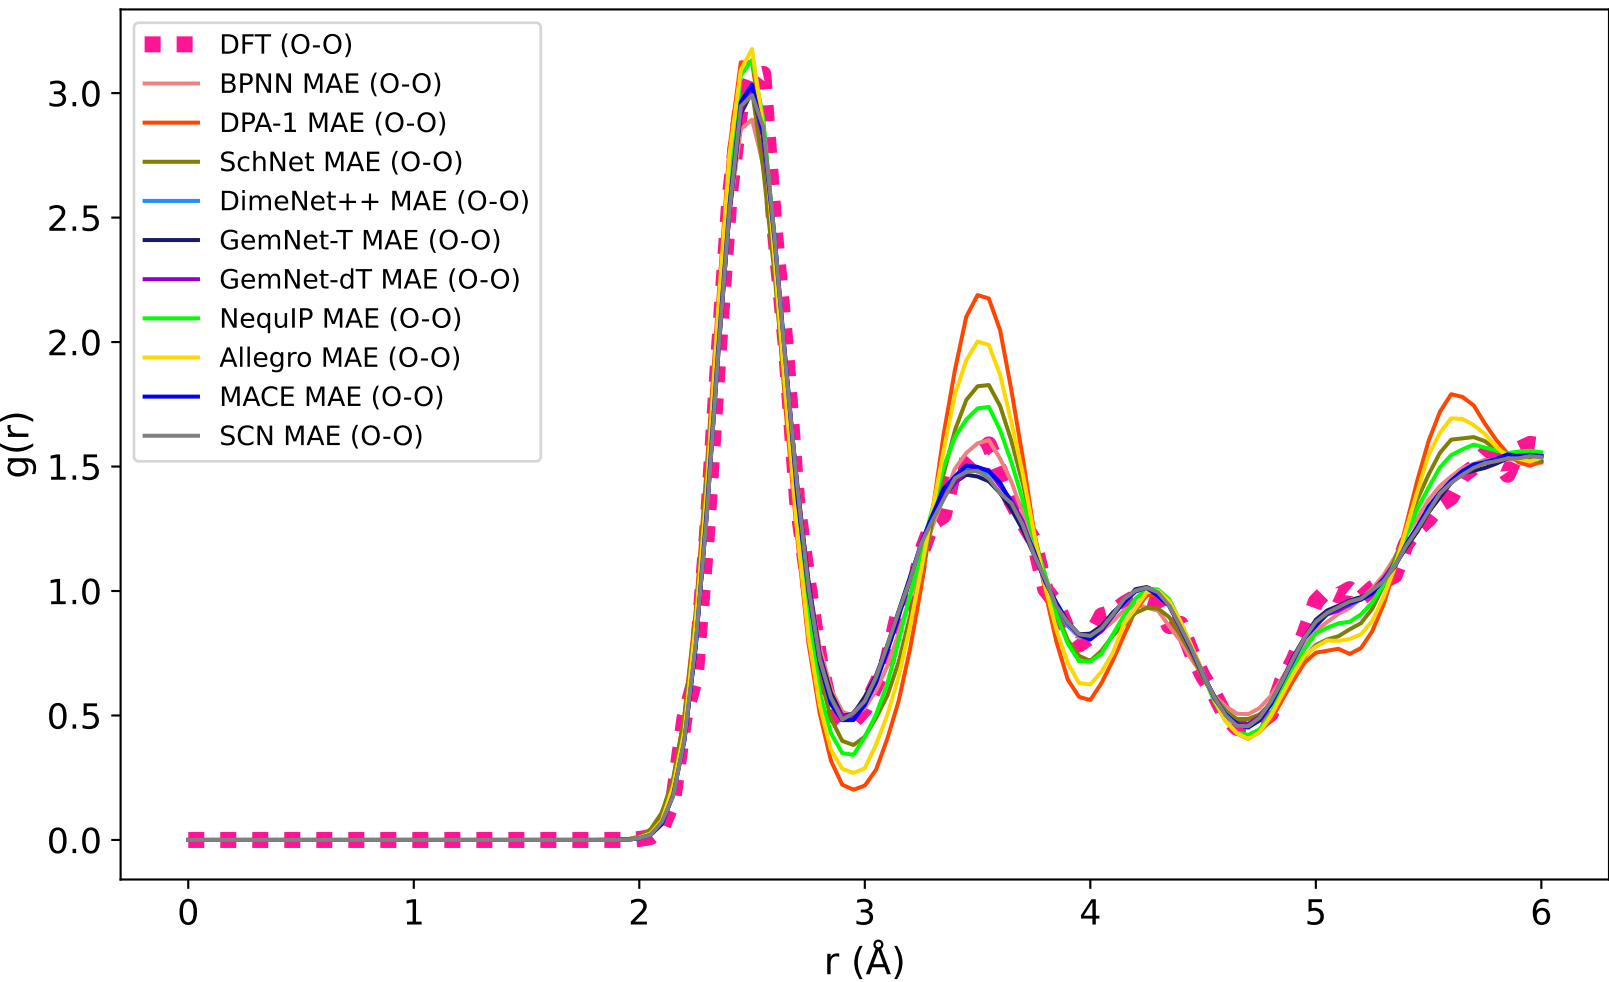

Supplement: supplementary_material [file attachment]

Fm3m, 96 atoms

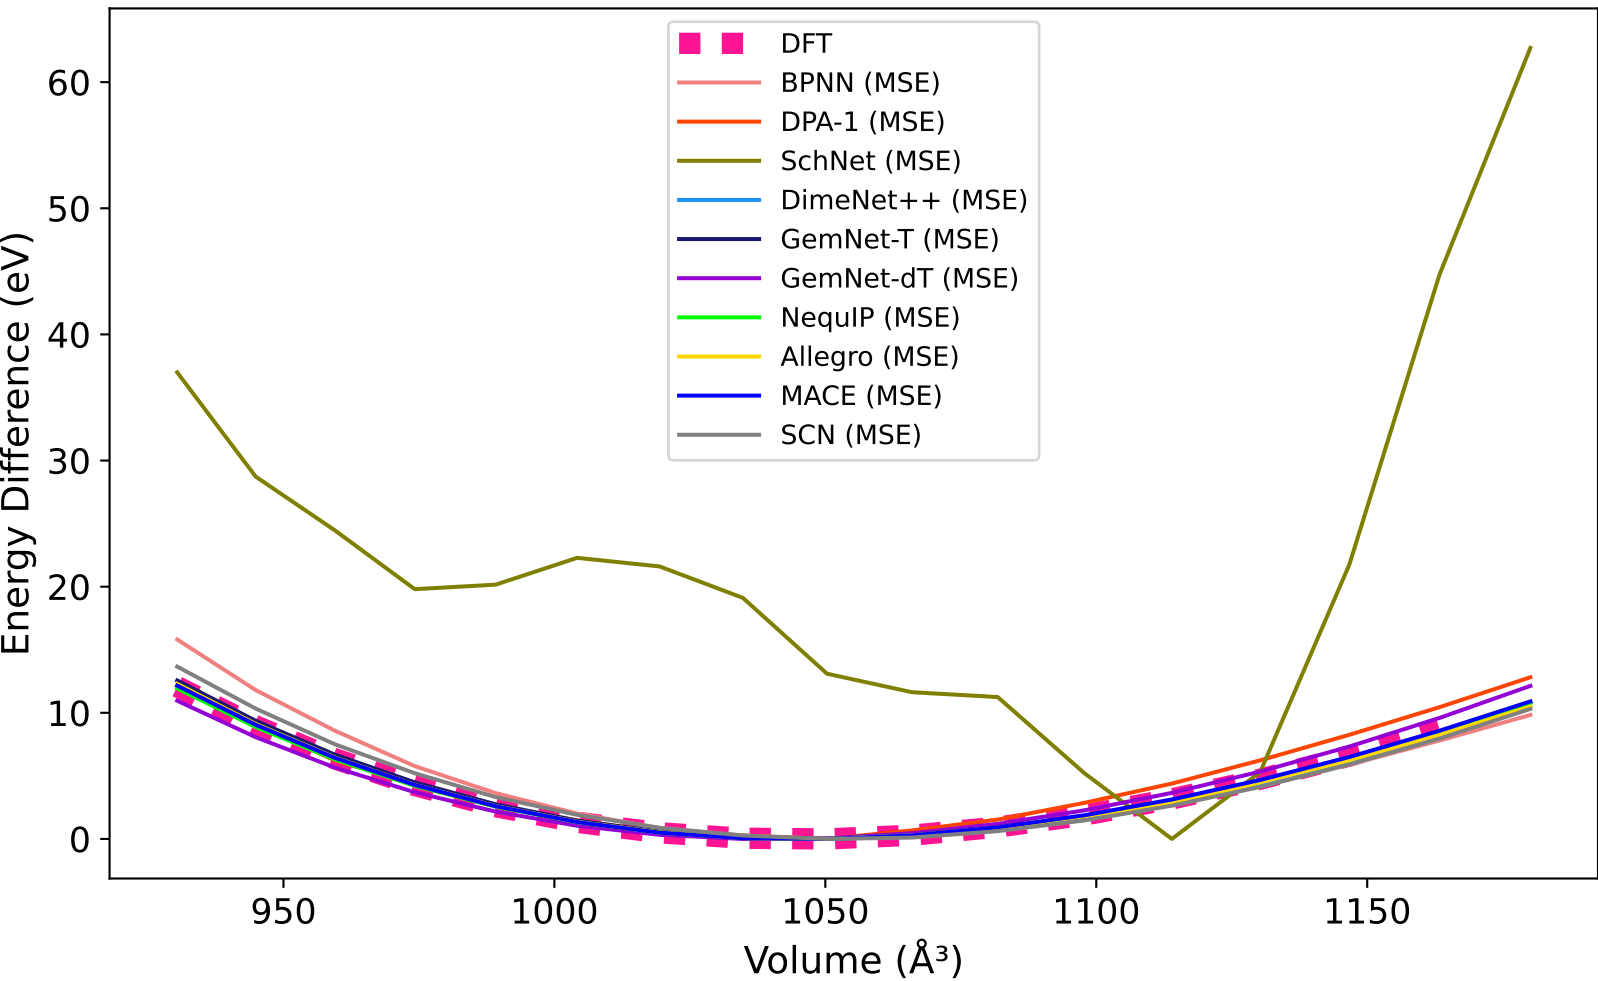

Supplement: supplementary_material [file attachment]

Cubic (1), 1200K, (Hf-O)

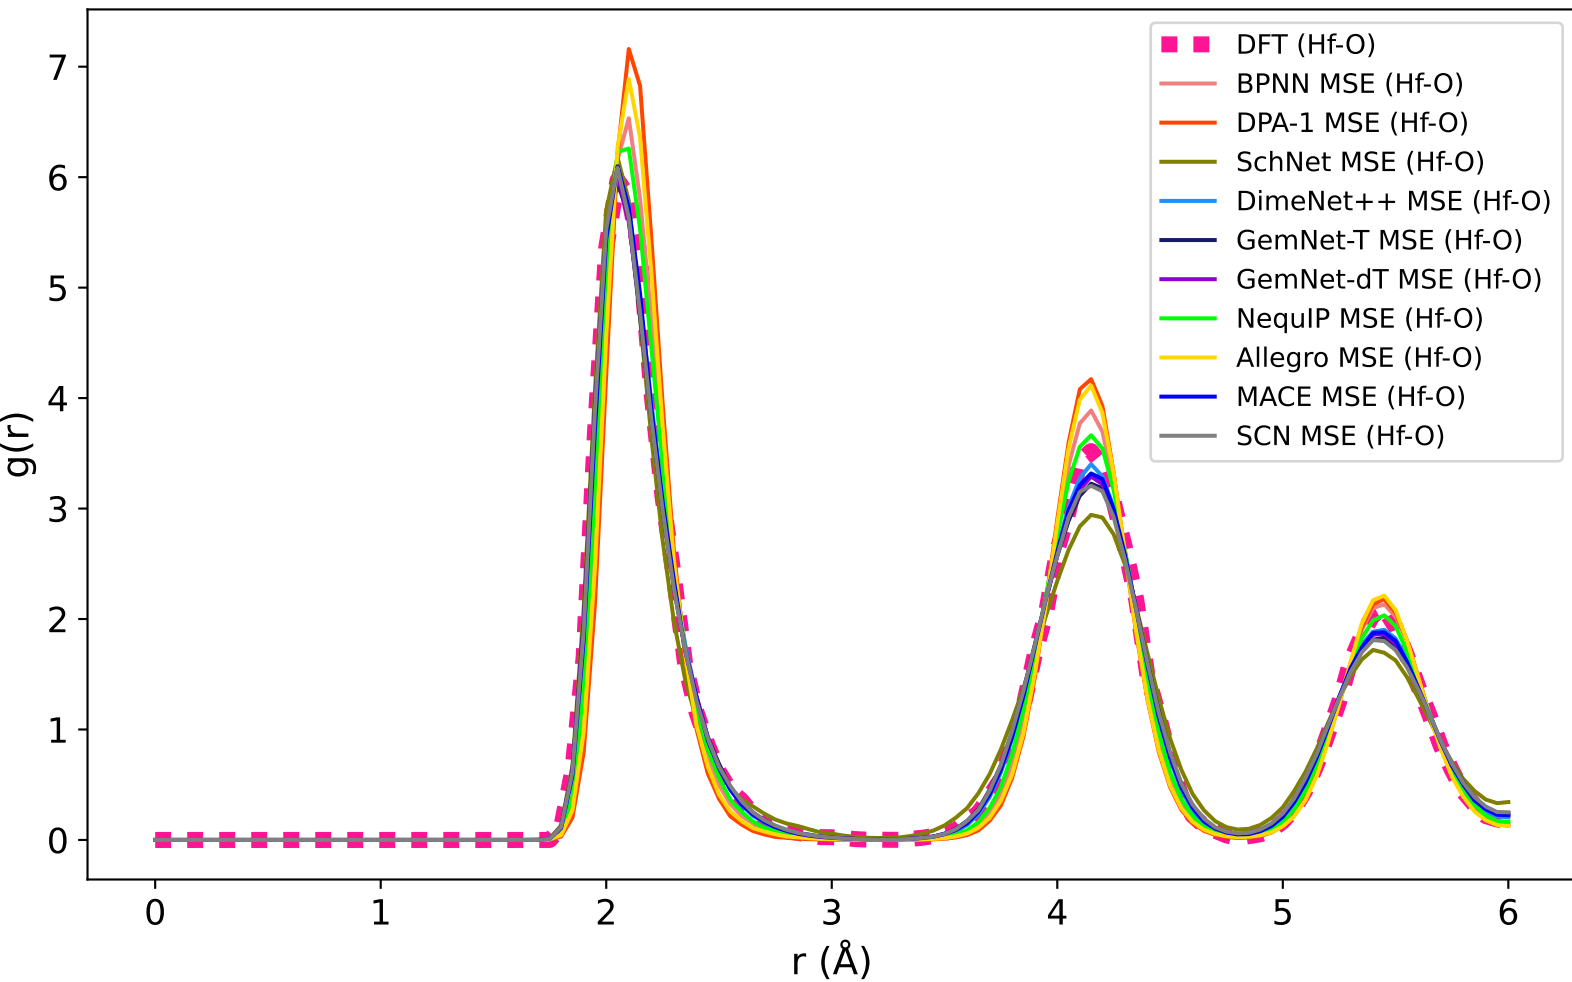

Supplement: supplementary_material [file attachment]

Tetragonal, 1800K, (O-O)

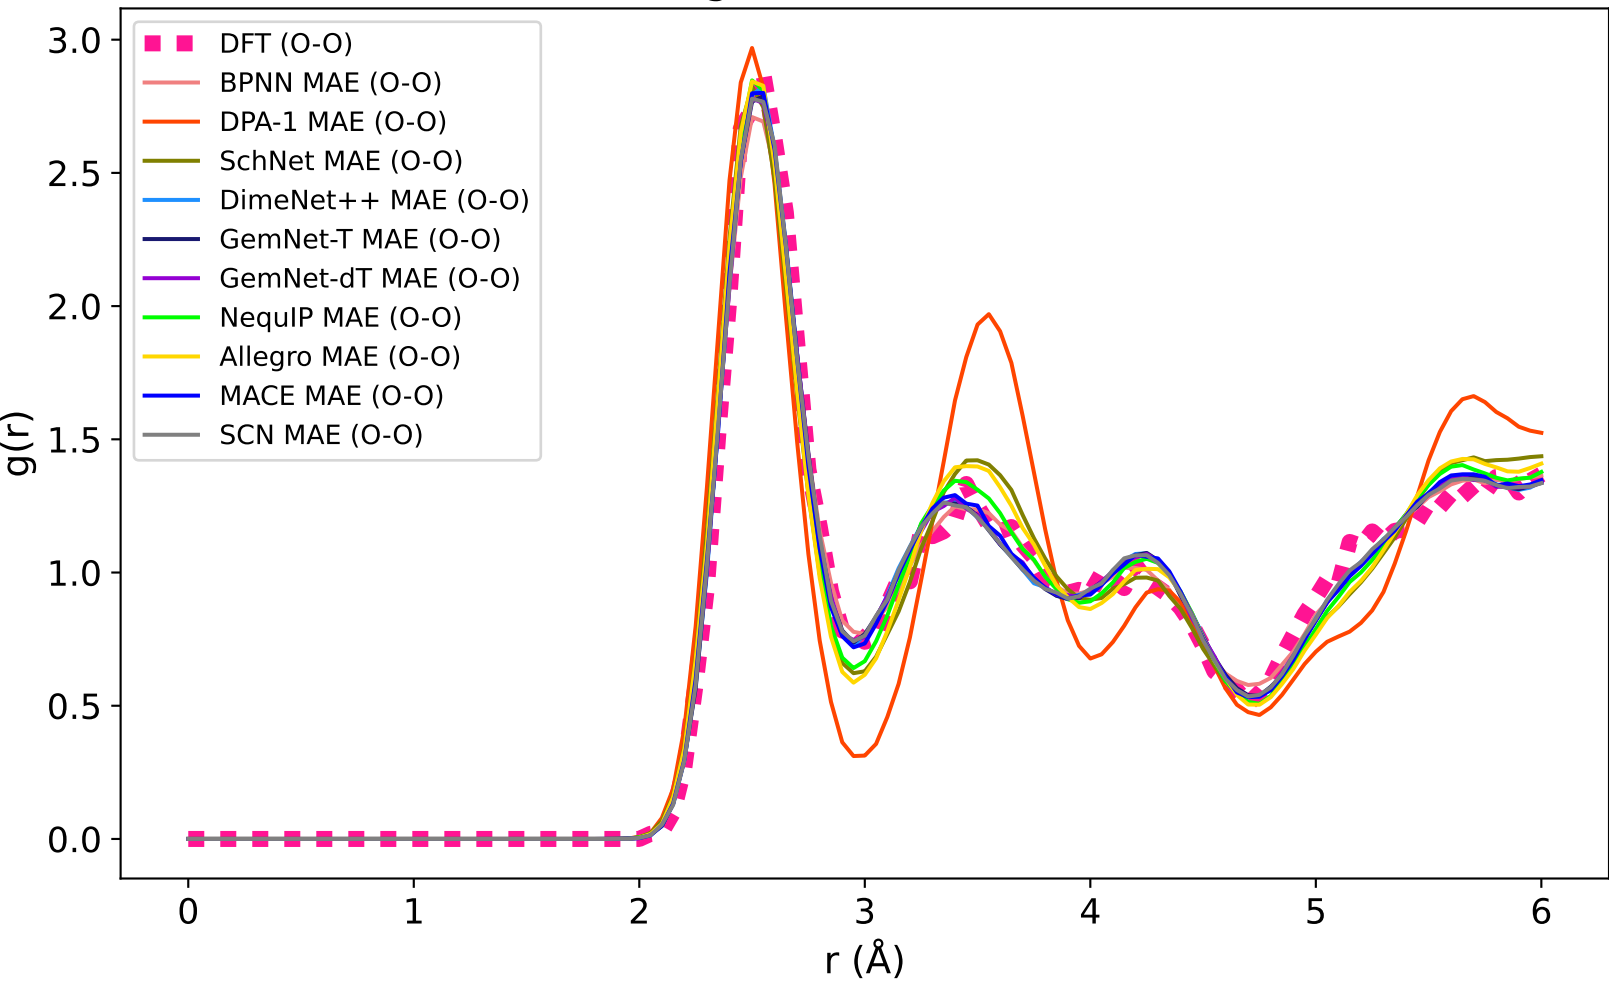

Supplement: supplementary_material [file attachment]

# Pbca, 96 atoms

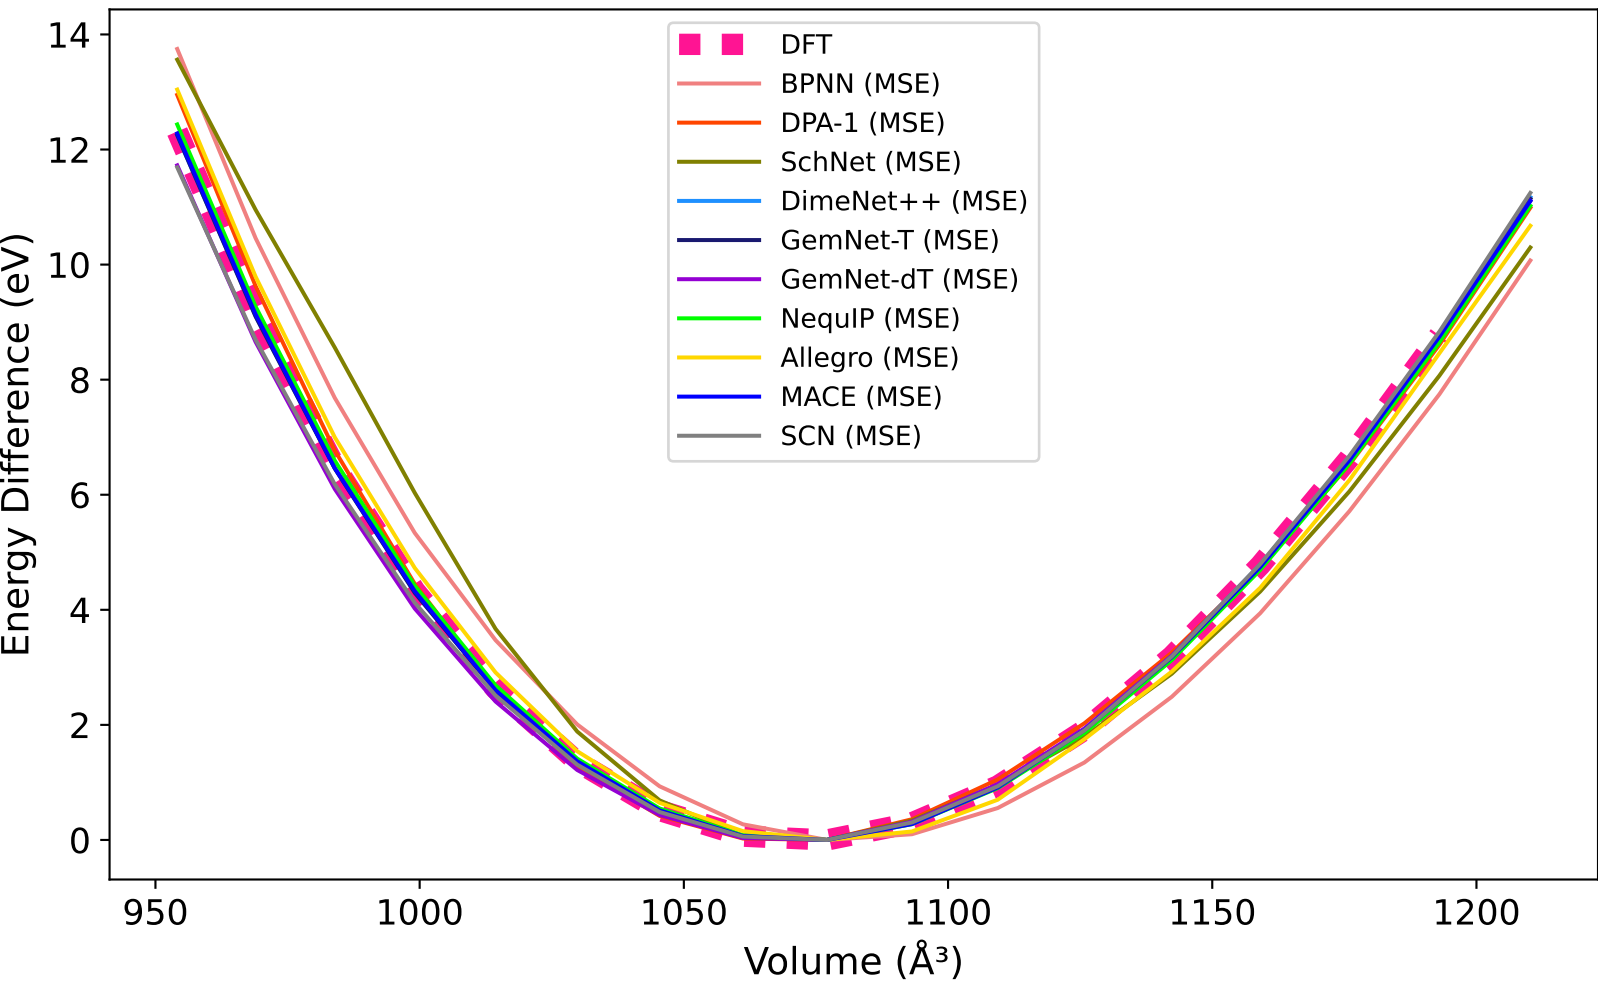

Supplement: supplementary_material [file attachment]

Orthorhombic (1), 1800K, (Hf-O)

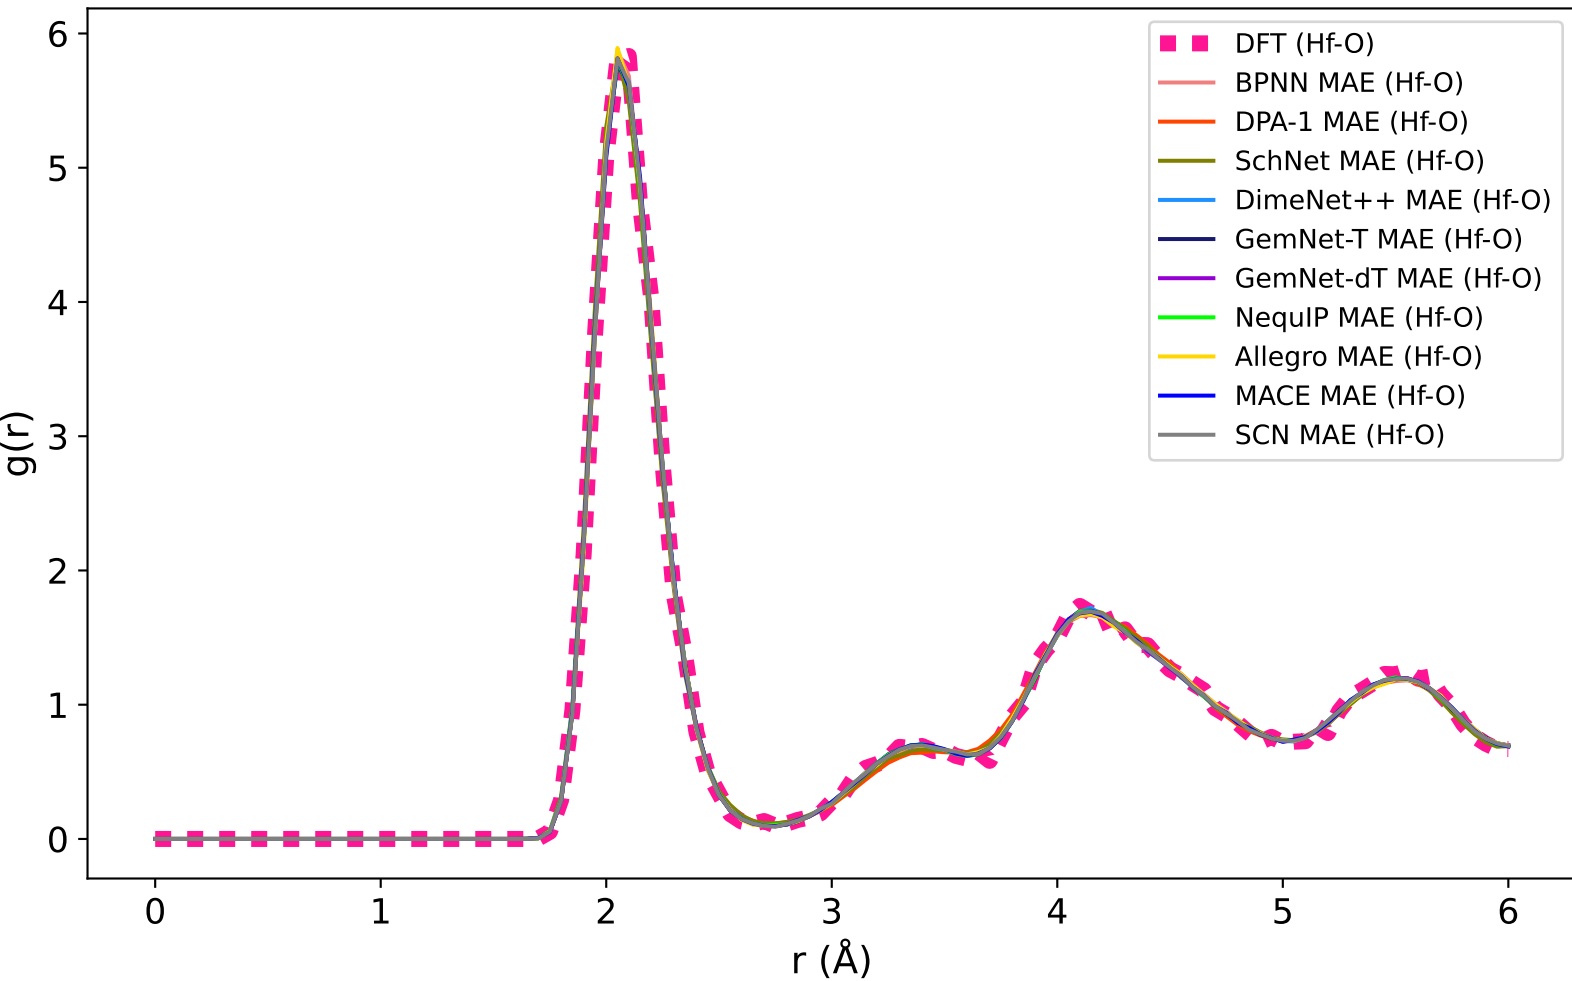

Supplement: supplementary_material [file attachment]

Cubic (1), 1200K, (Si-Si)

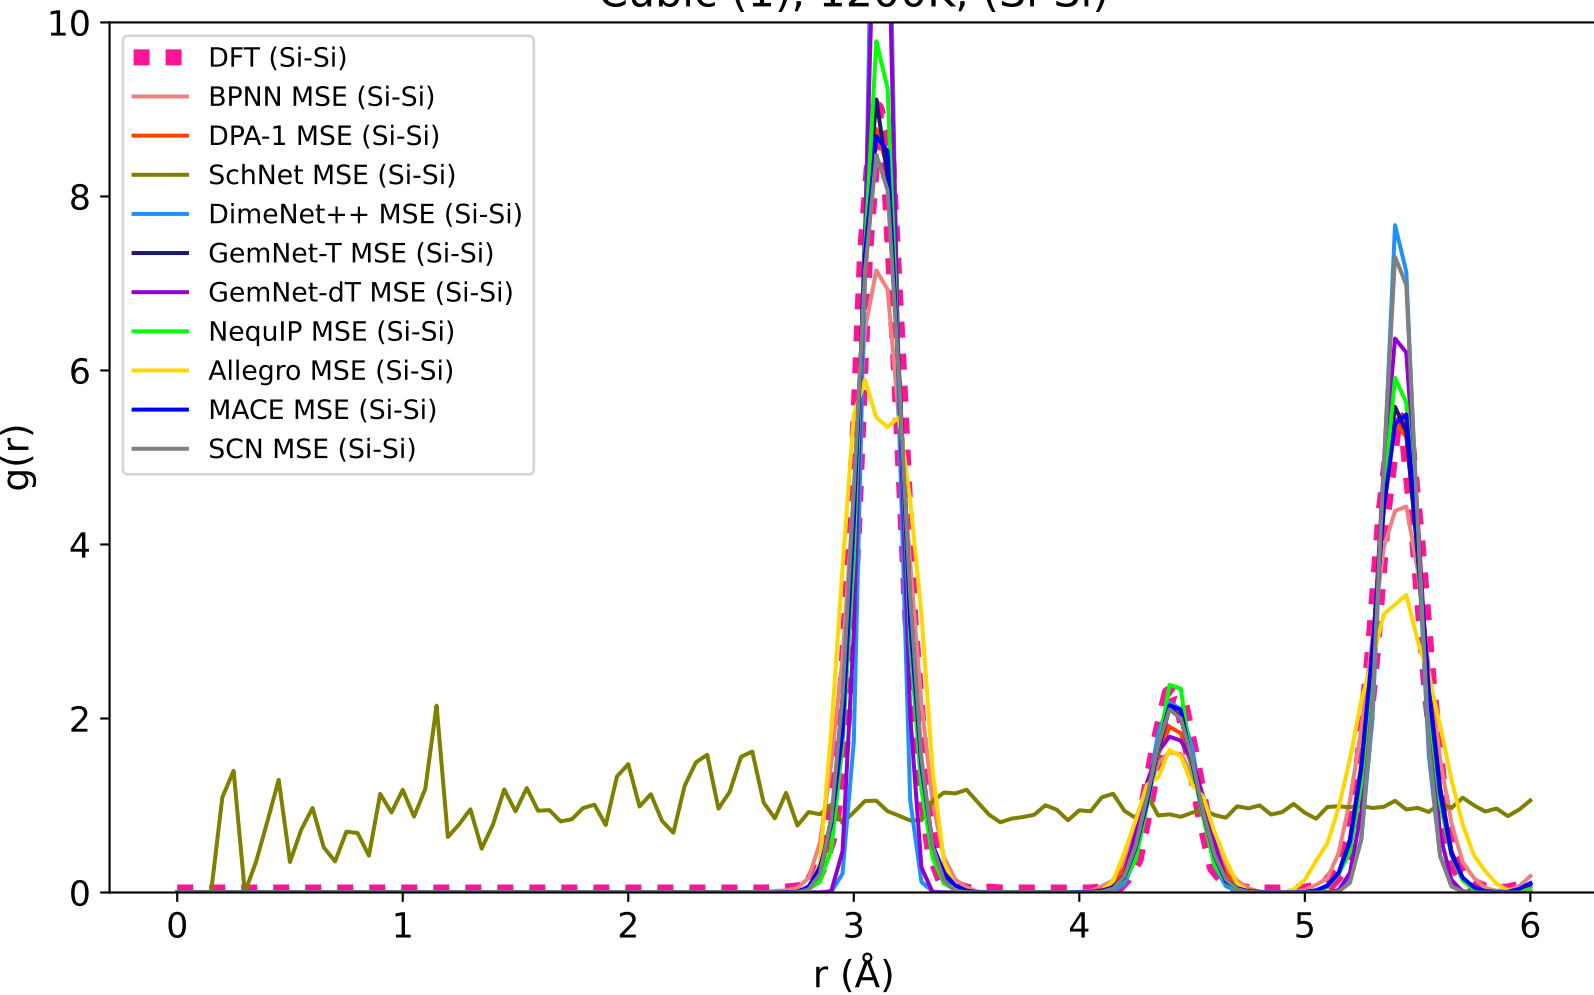

Supplement: supplementary_material [file attachment]

Tetragonal, 1200K, (Hf-O)

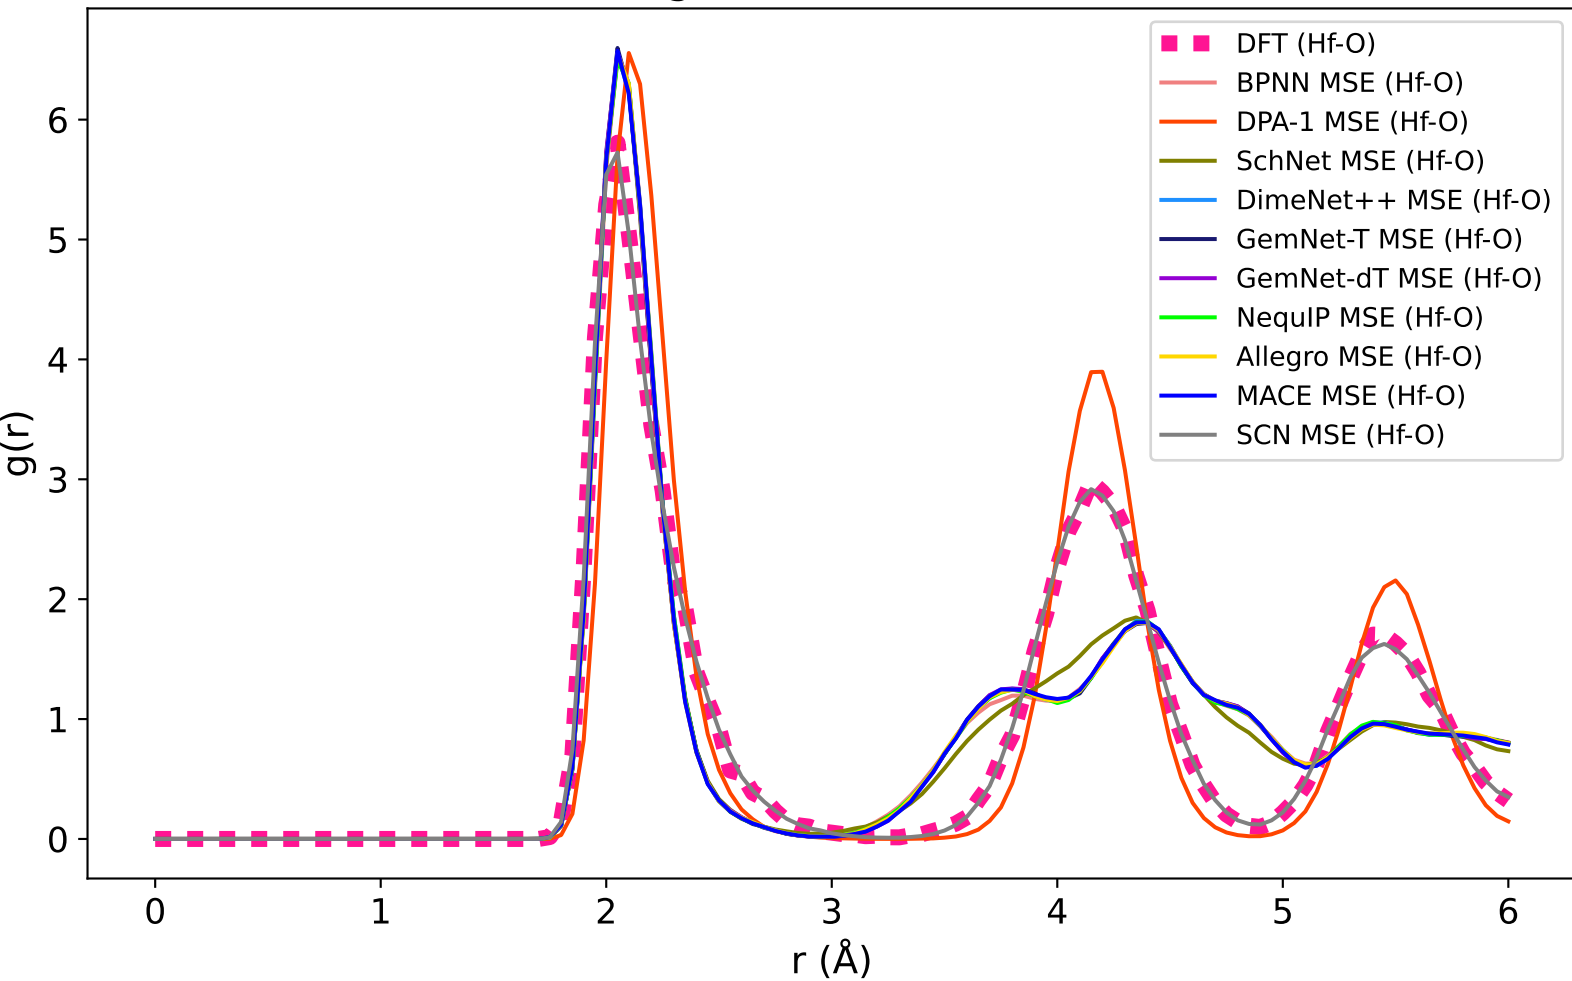

Supplement: supplementary_material [file attachment]

Orthorhombic (1), 1200K, (Hf-O)

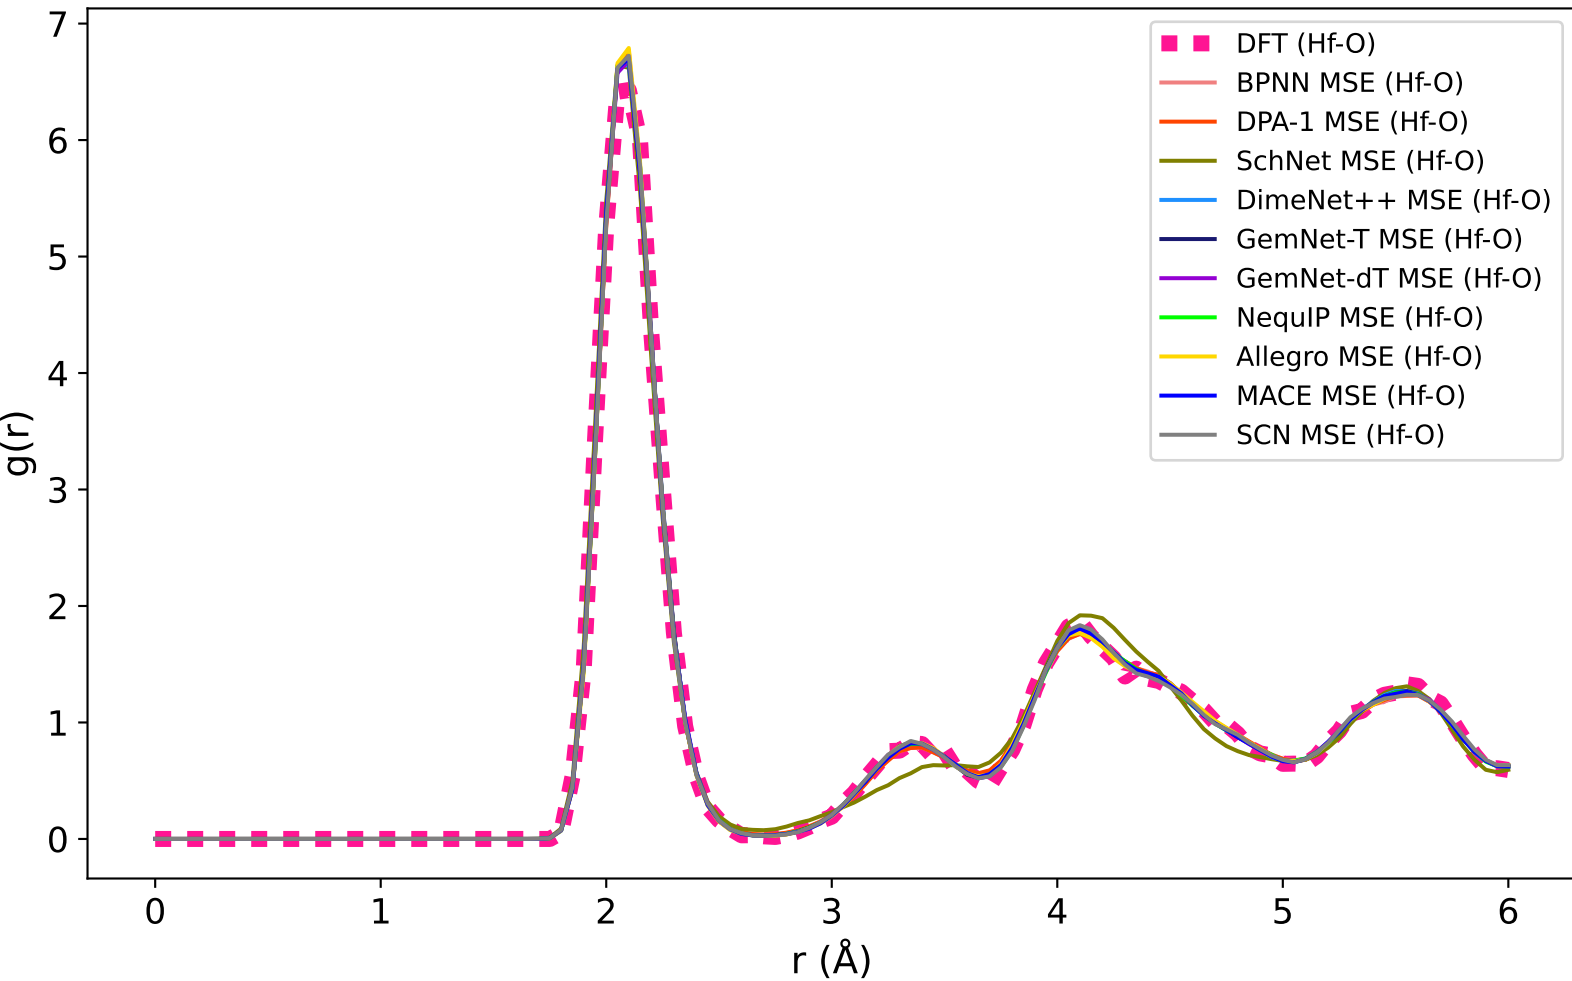

Supplement: supplementary_material [file attachment]

Amorphous, 1200K, (Si-Si)

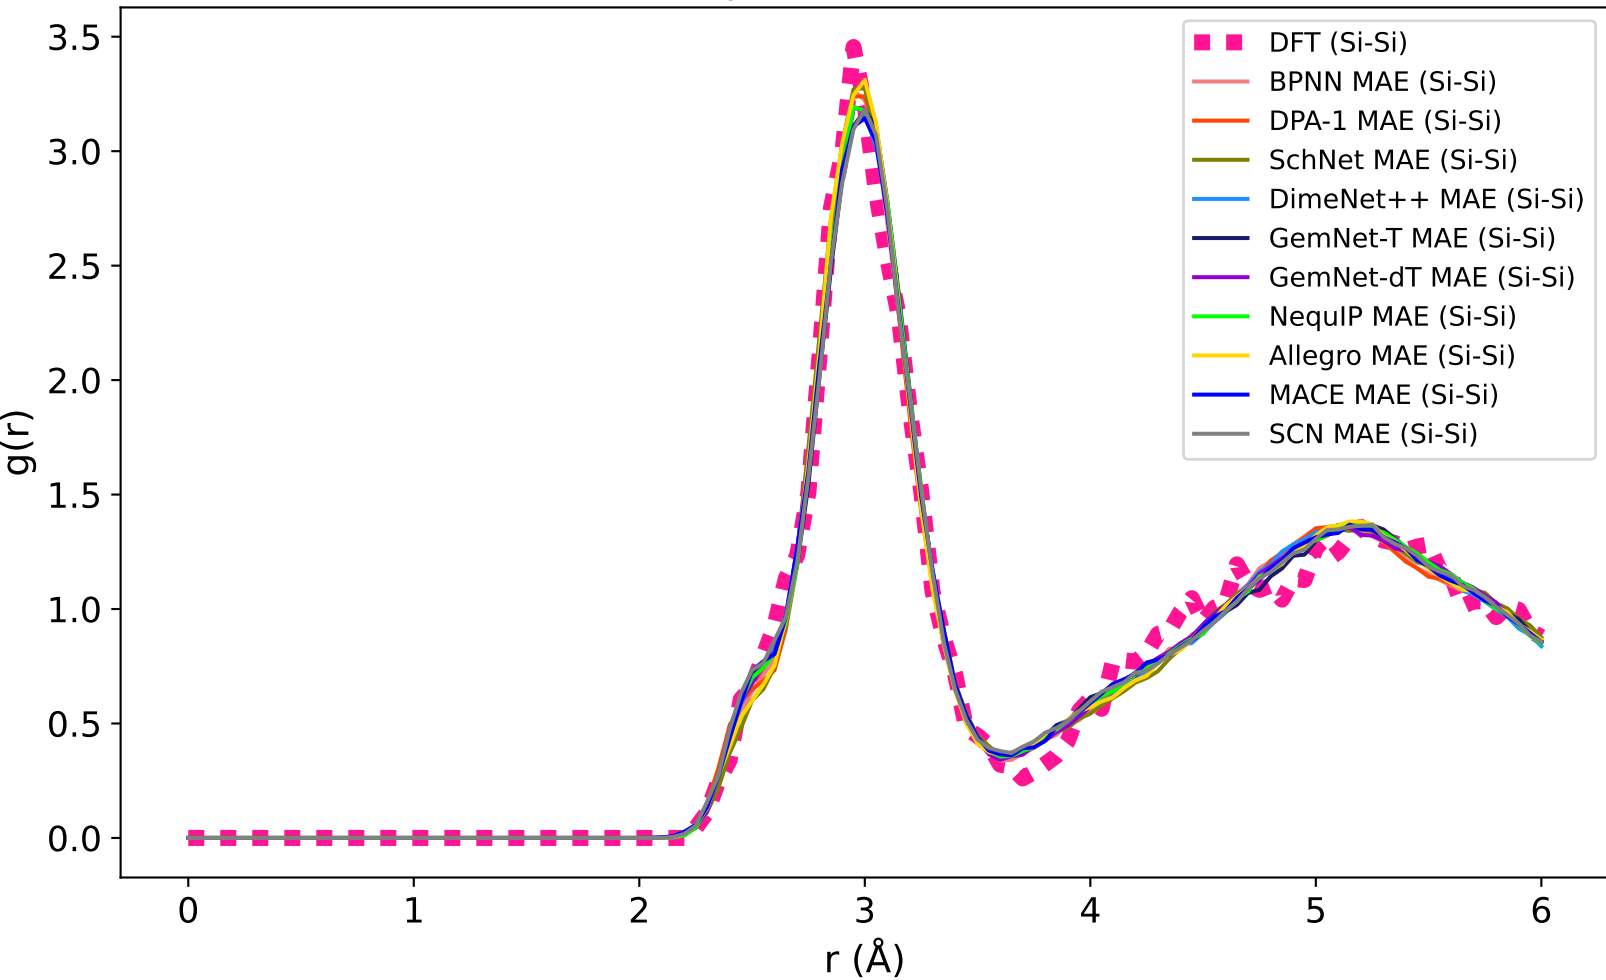

Supplement: supplementary_material [file attachment]

P2<sub>1</sub>/c, 96 atoms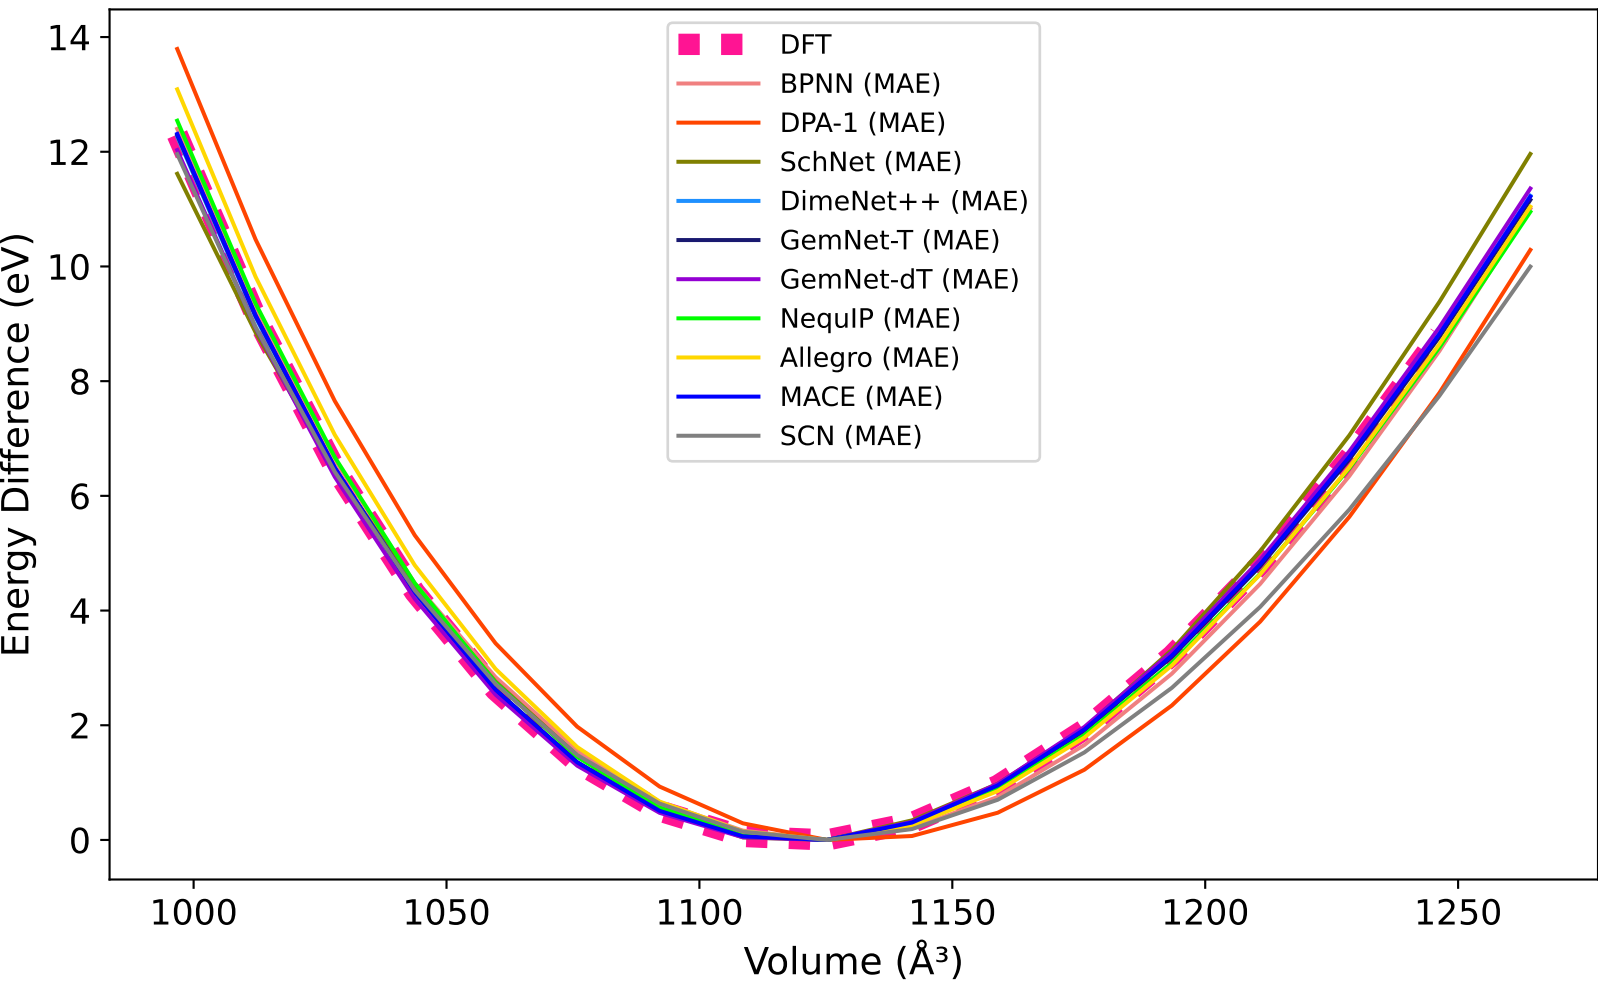

Supplement: supplementary_material [file attachment]

Orthorhombic (2), 1200K, (Hf-O)

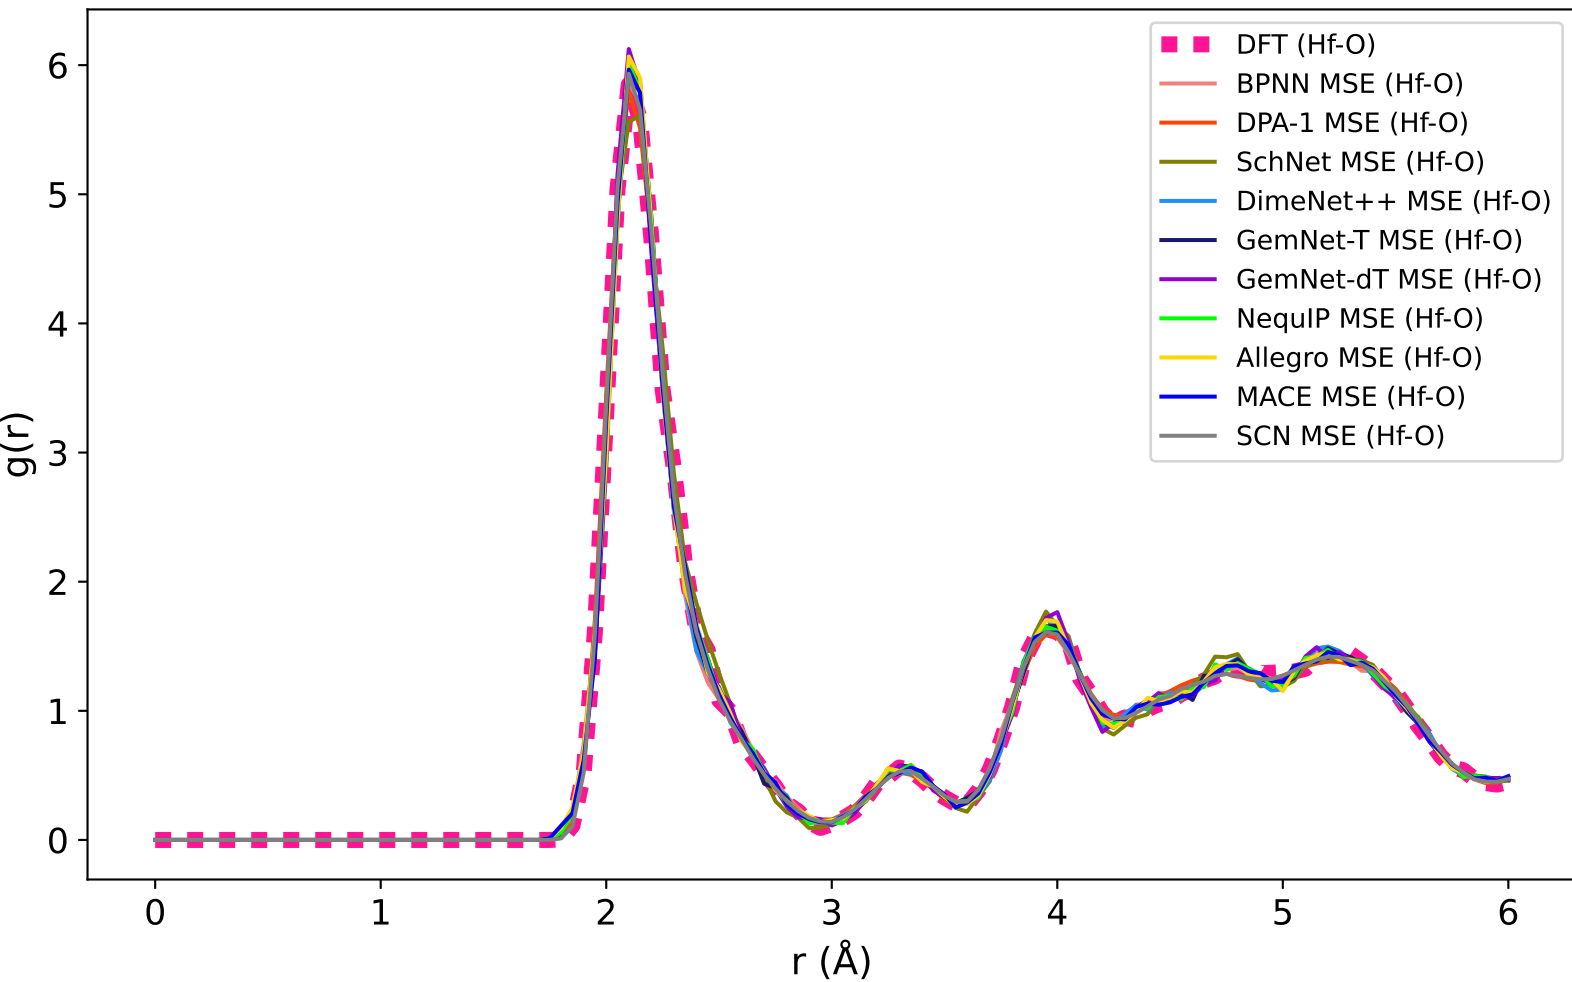

Supplement: supplementary_material [file attachment]

Cubic (1), 1800K, (Hf-Hf)

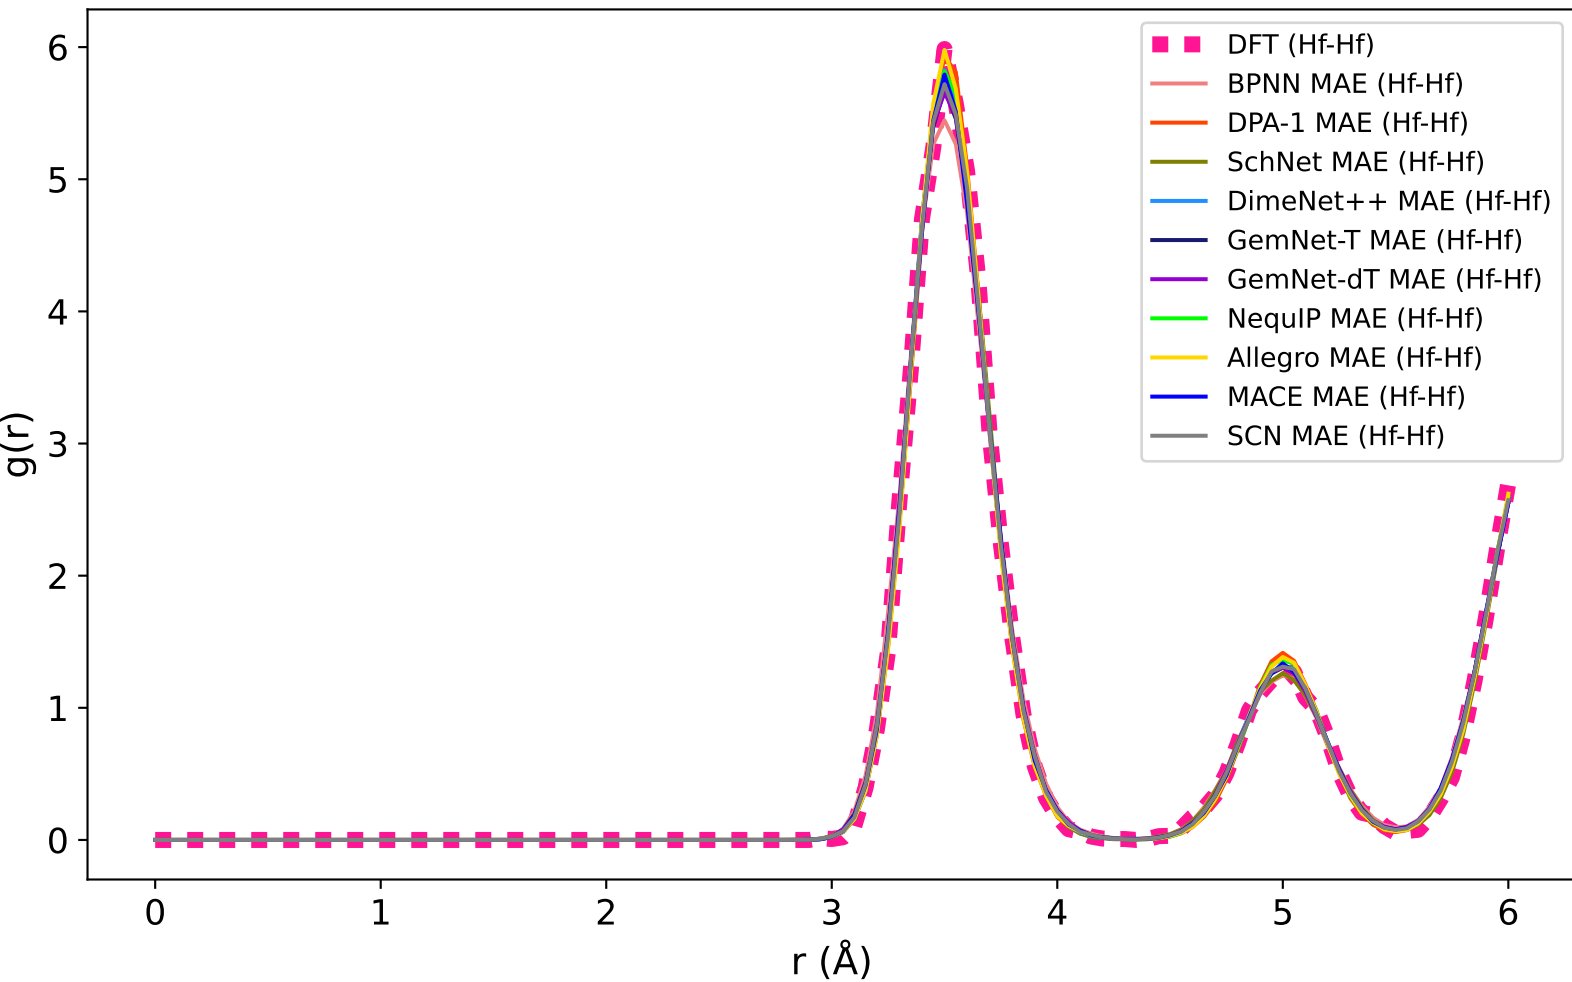

Supplement: supplementary_material [file attachment]

# Monoclinic, 1800K, (O-O)

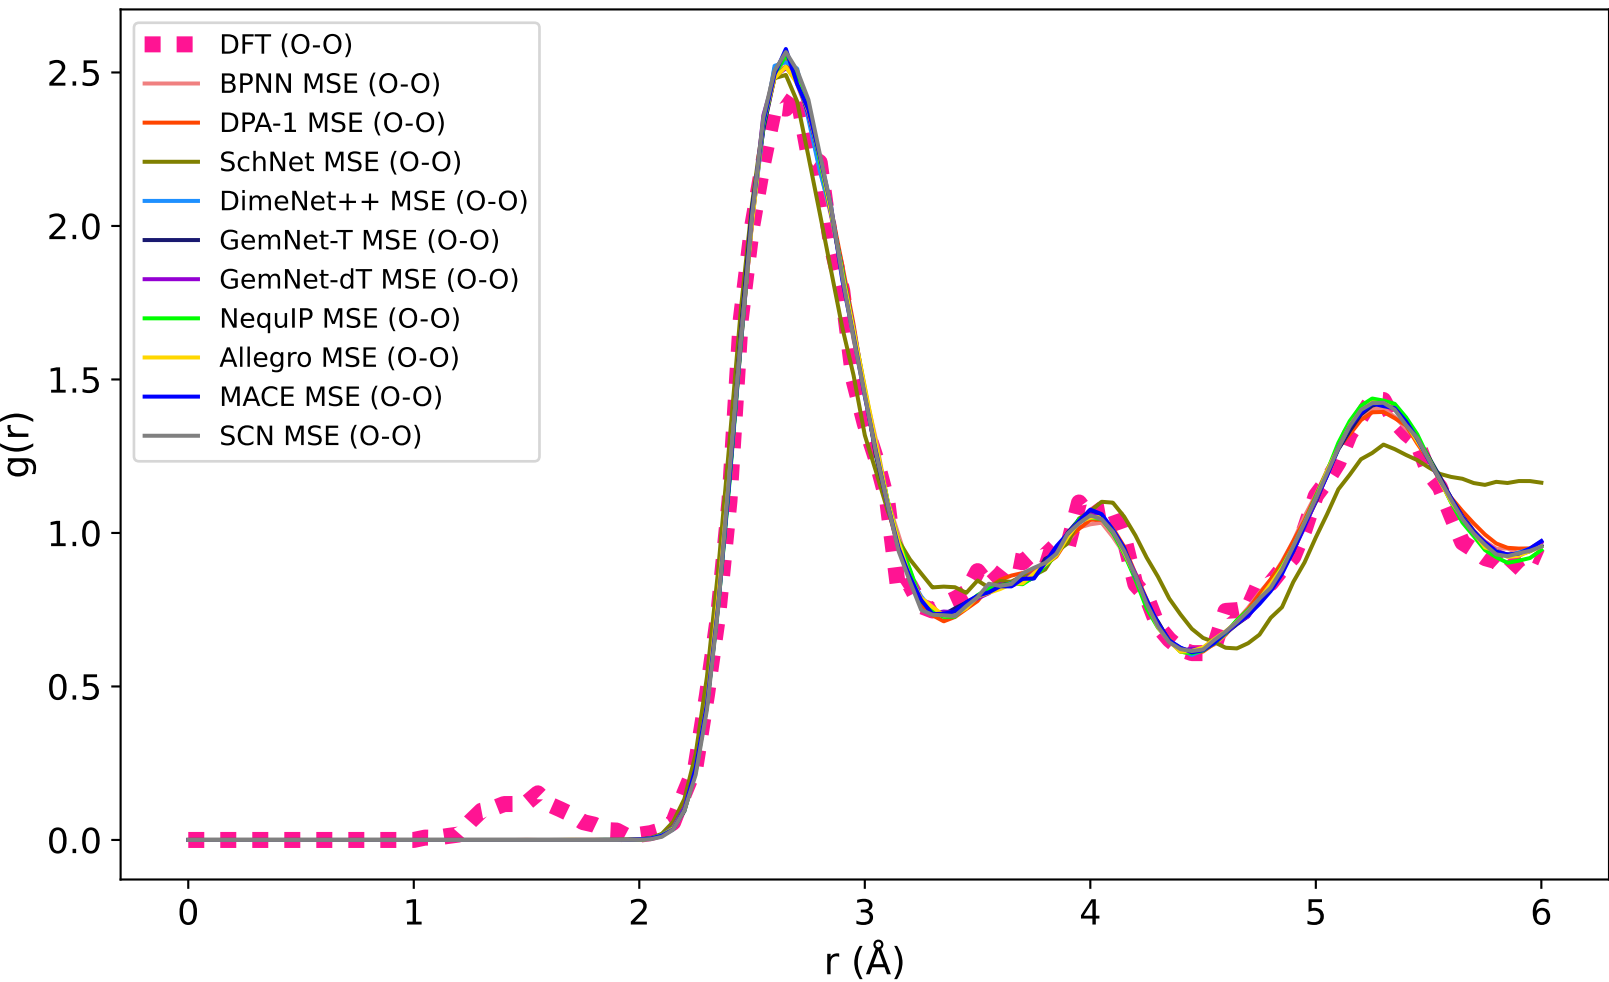

Supplement: supplementary_material [file attachment]

Tetragonal, 1200K, (Hf-Hf)

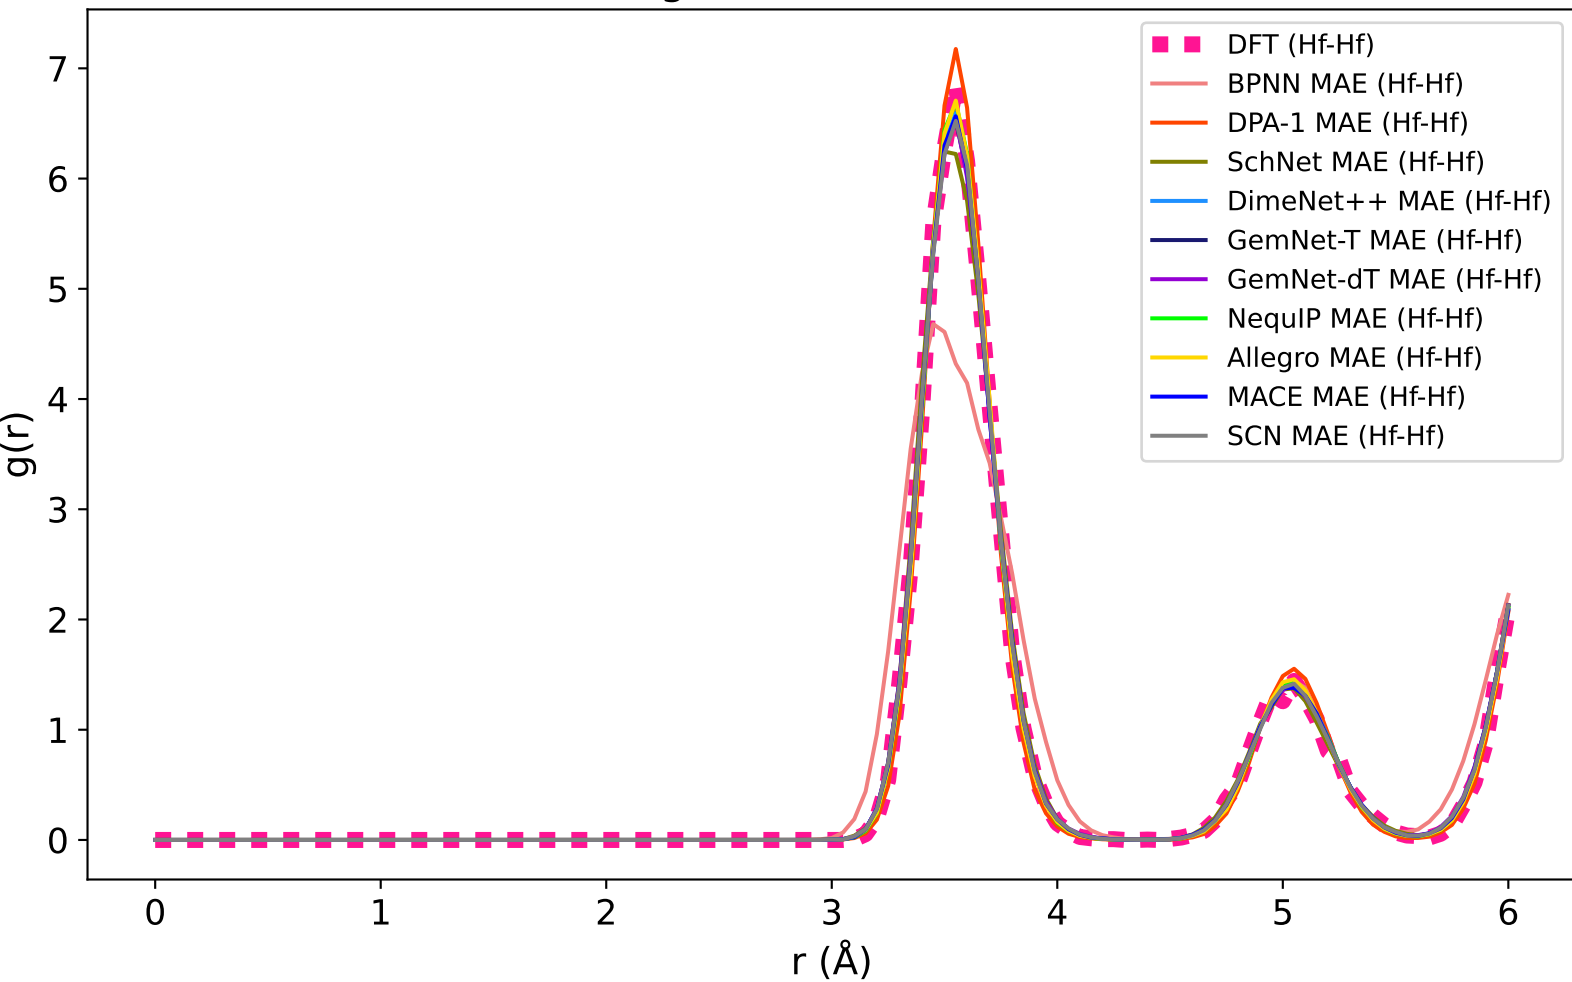

Supplement: supplementary_material [file attachment]

# Fd3m, 56 atoms

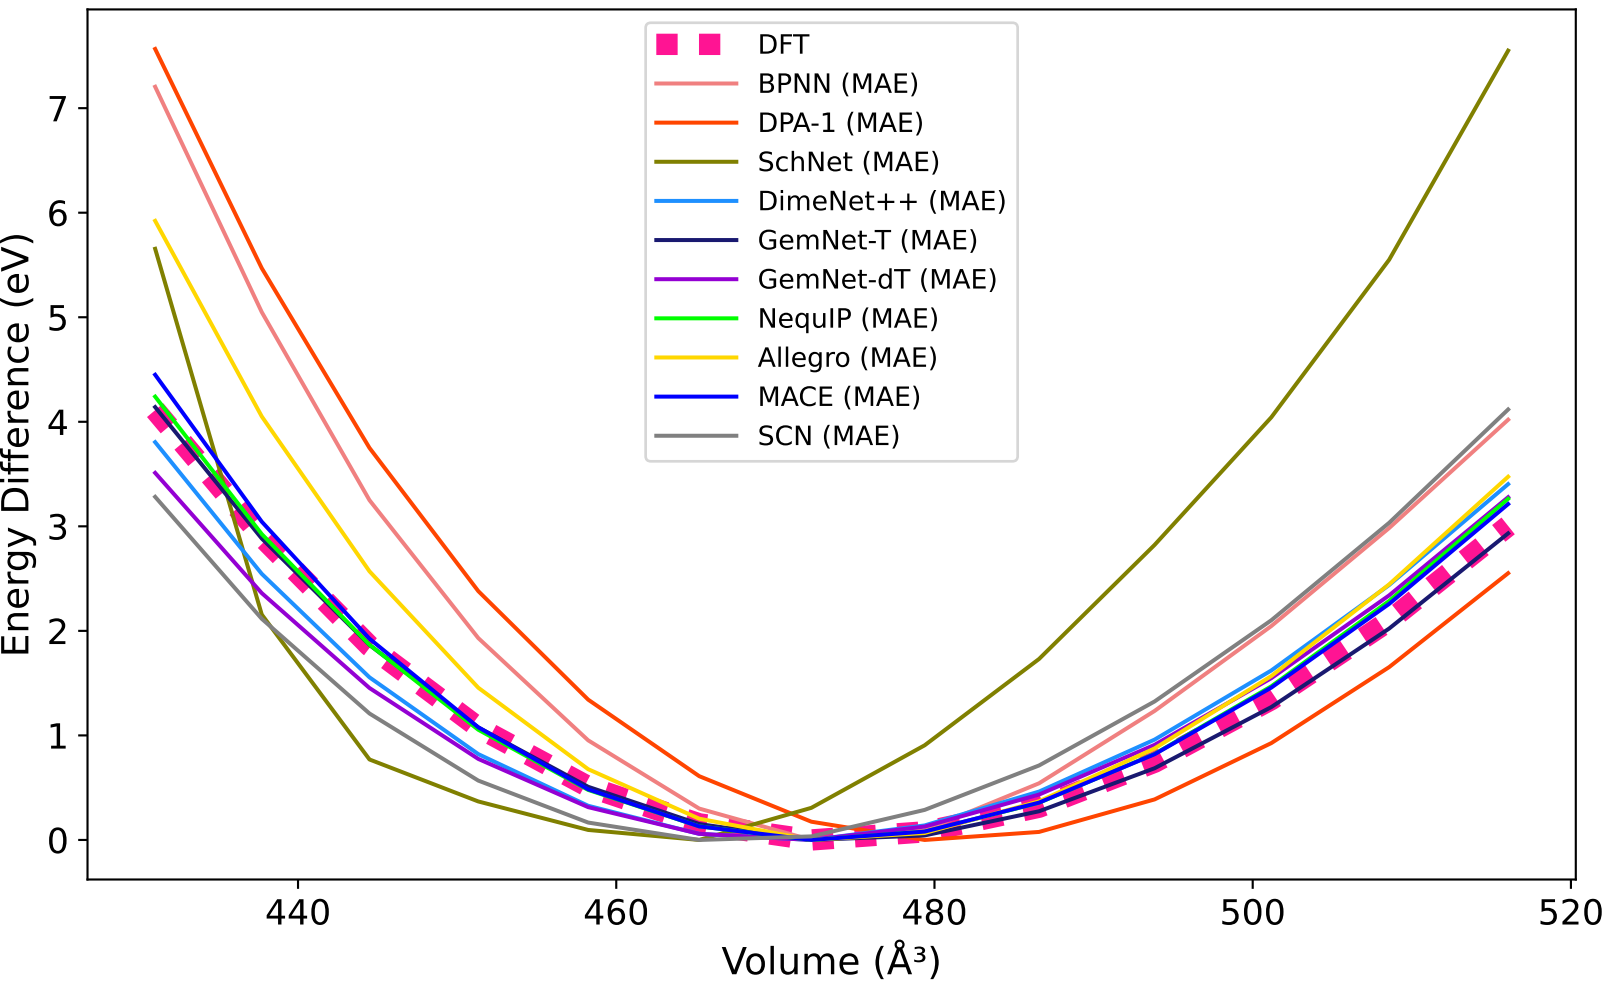

Supplement: supplementary_material [file attachment]

# Orthorhombic (2), 1800K, (Hf-O)

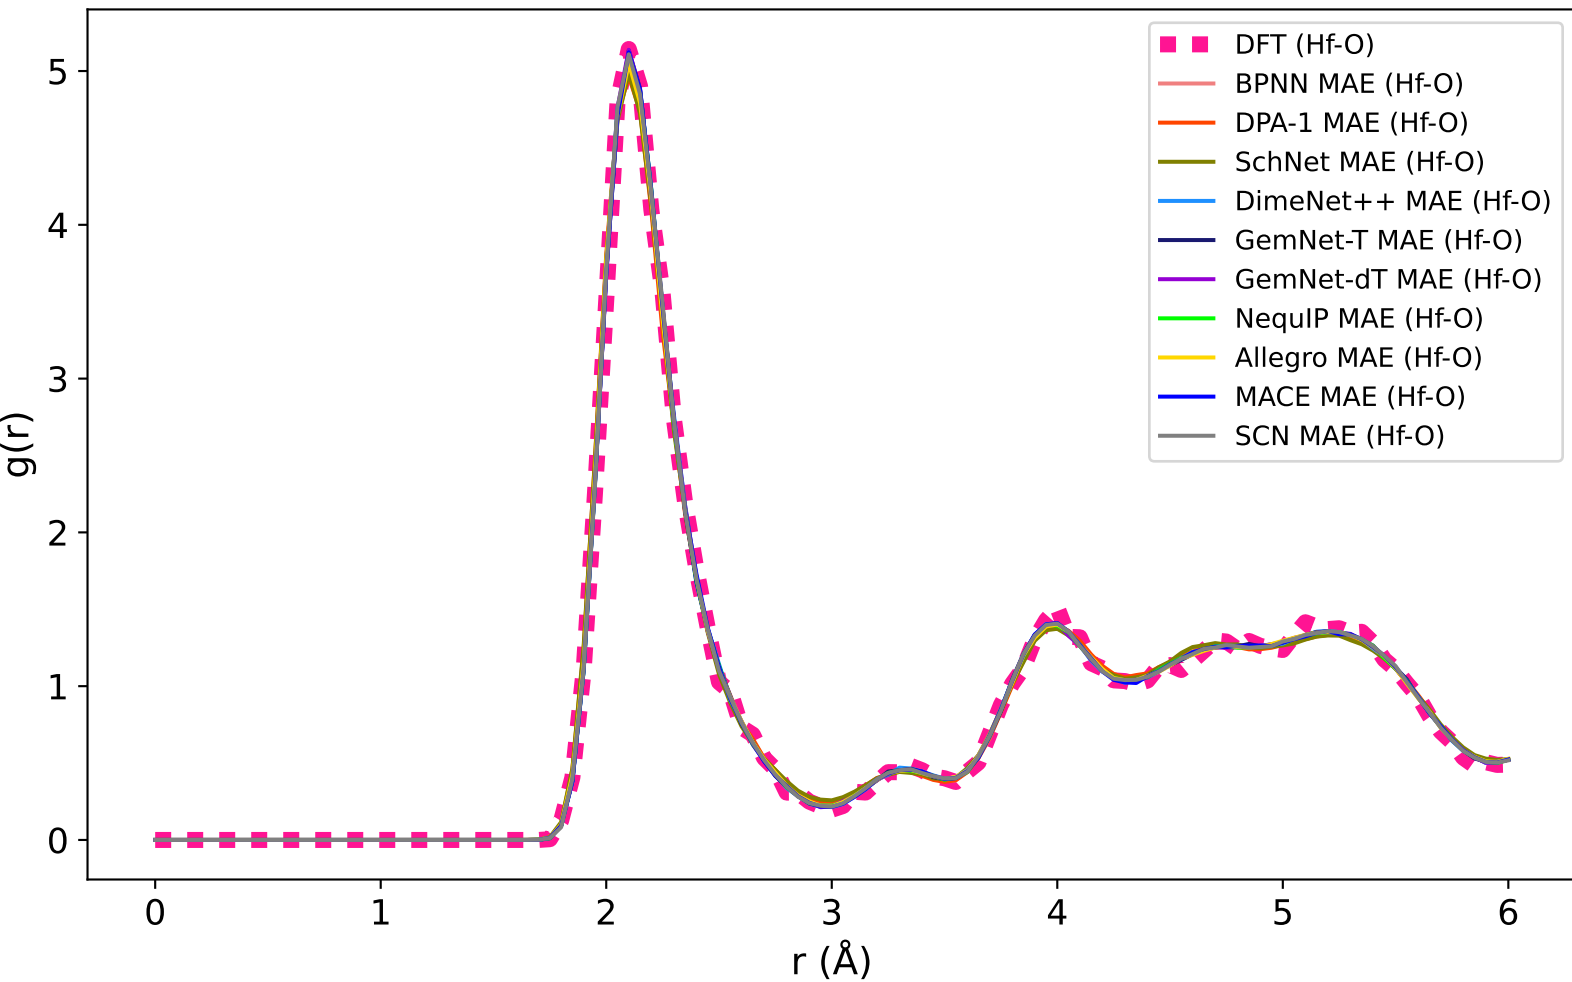

Supplement: supplementary_material [file attachment]

Cubic (2), 1200K, (0-0)

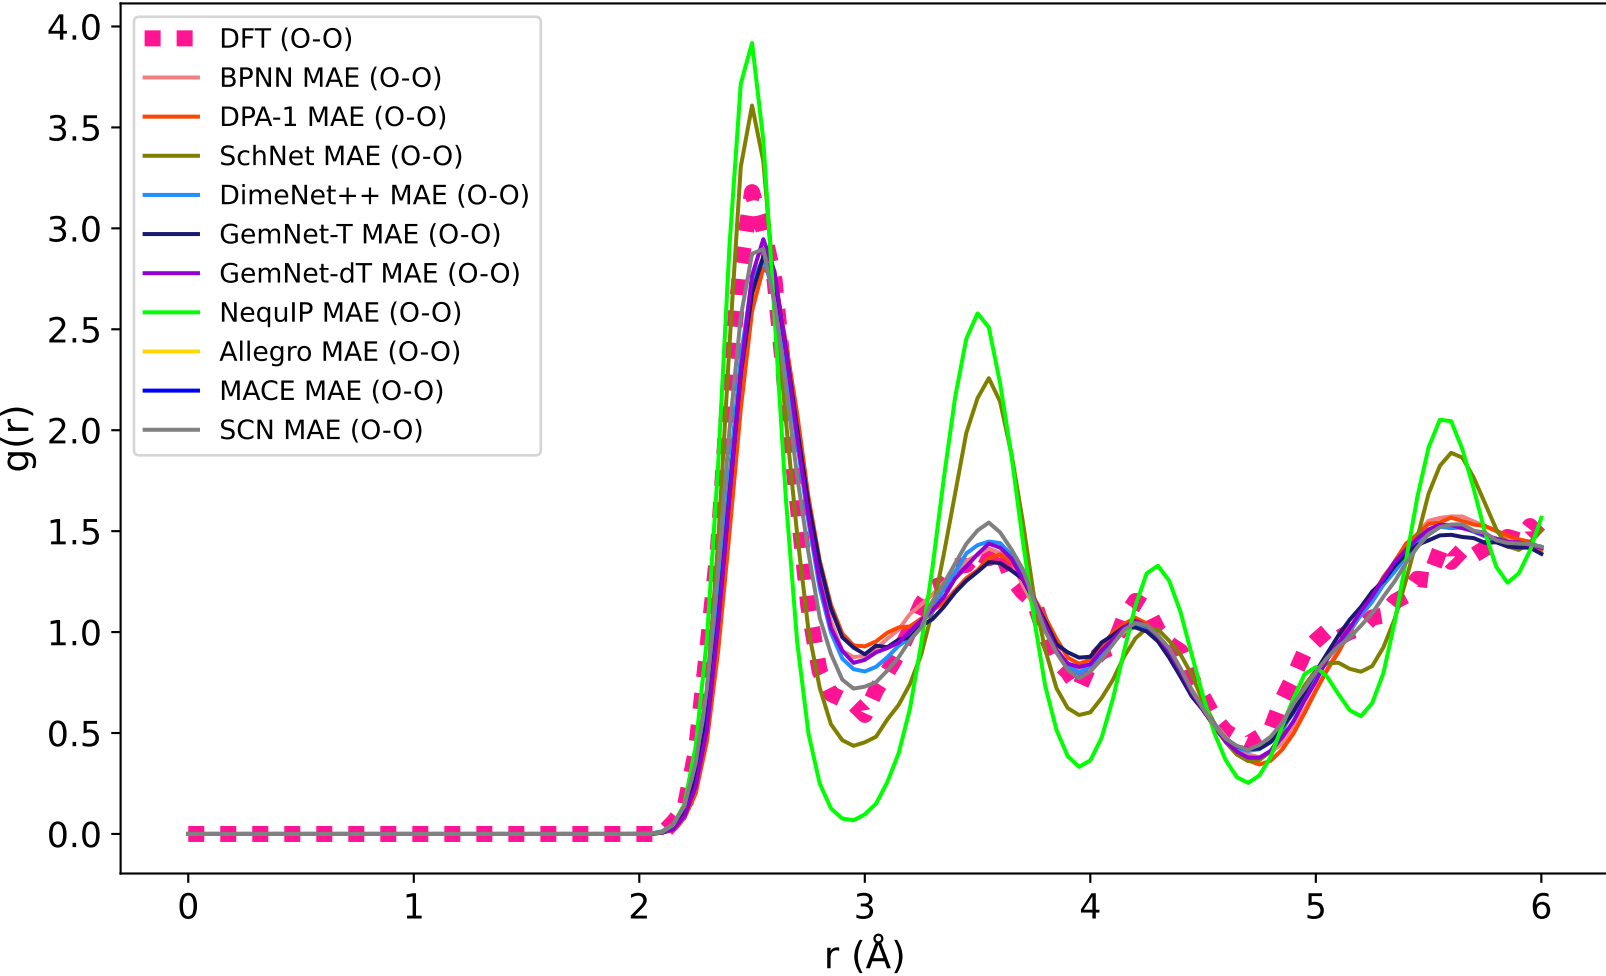

Supplement: supplementary_material [file attachment]

Cubic (1), 1200K, (Si-Si)

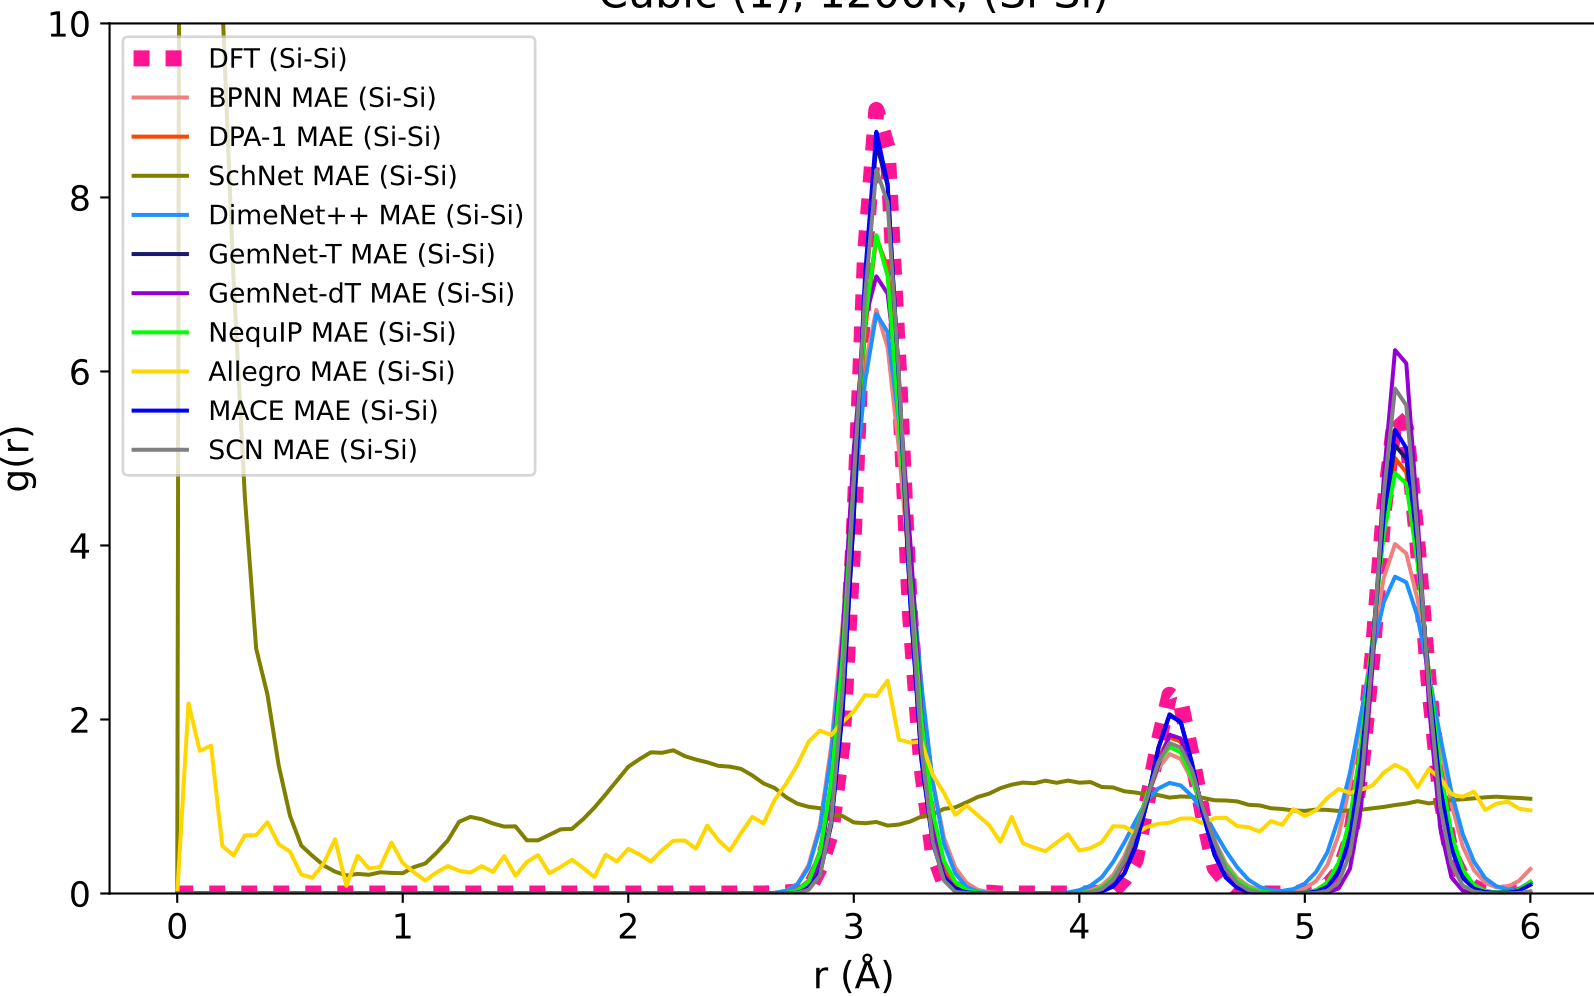

Supplement: supplementary_material [file attachment]

Monoclinic, 1200K, (Hf-O)

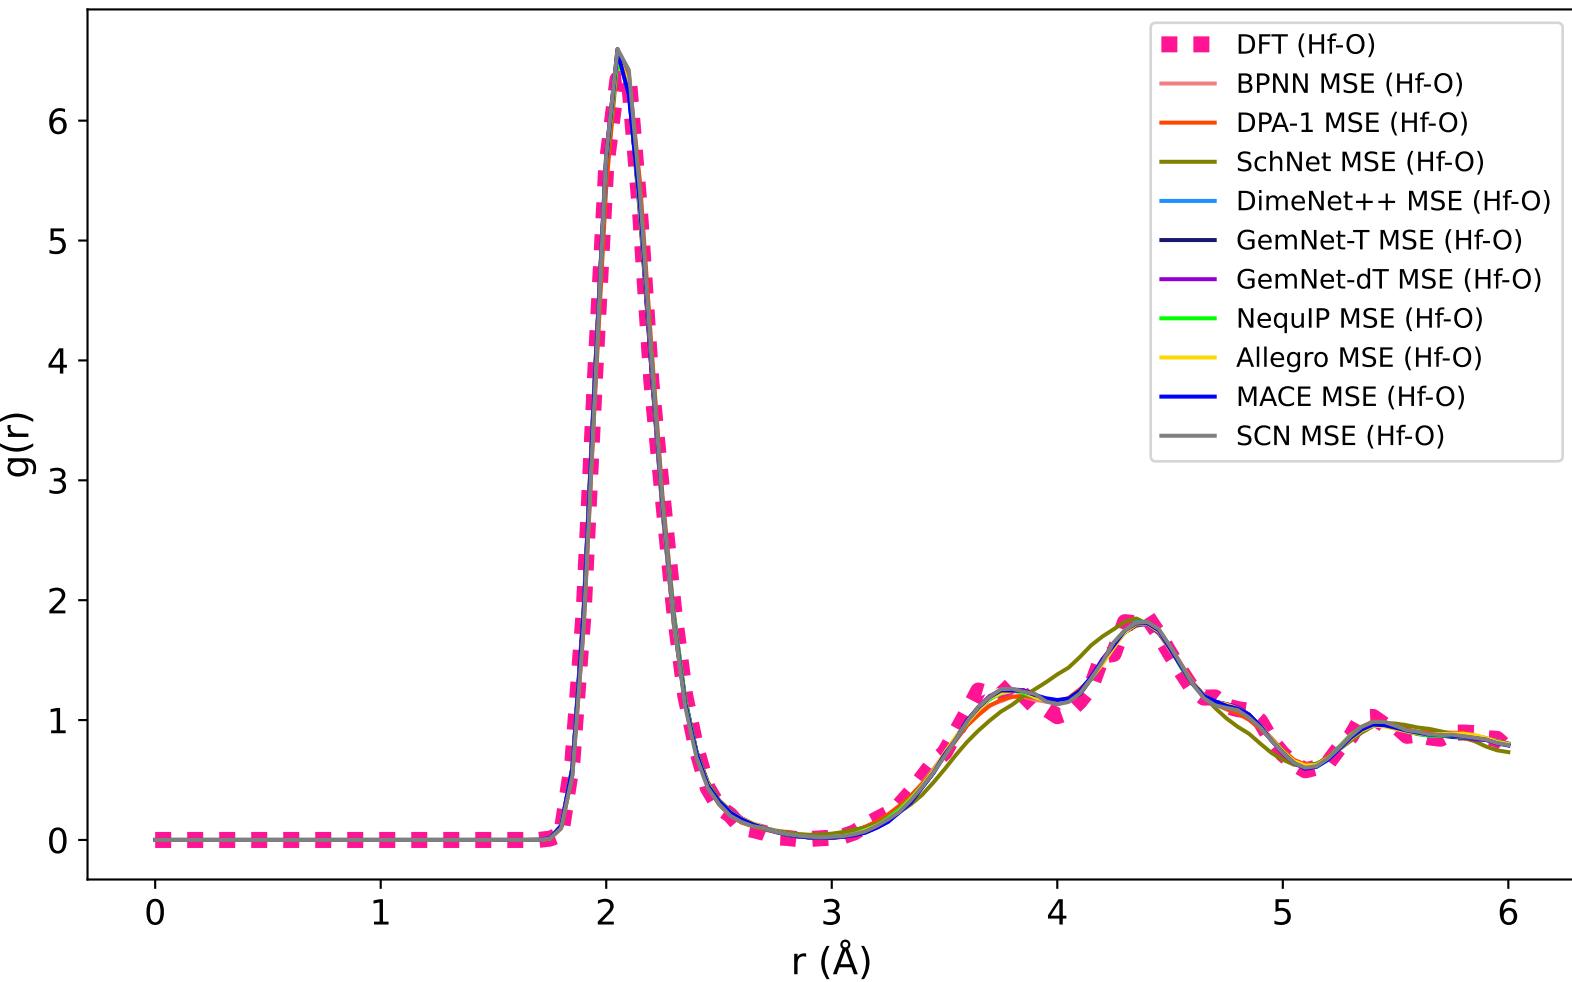

Supplement: supplementary_material [file attachment]

# P1, 14 atoms

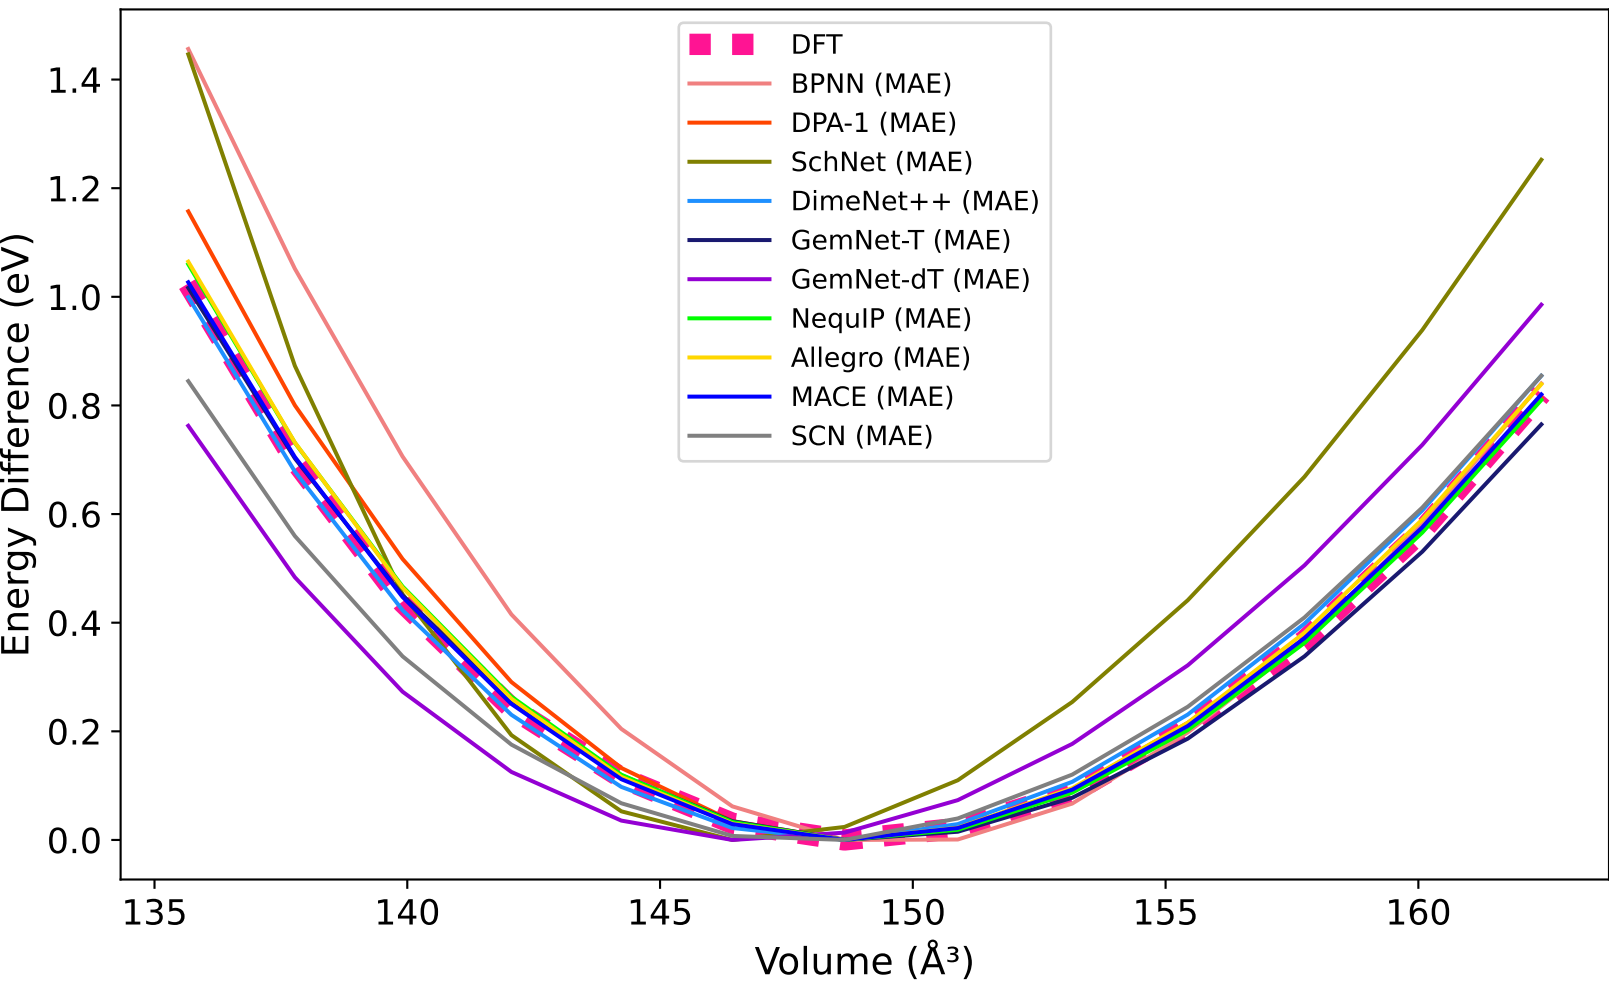

Supplement: supplementary_material [file attachment]

Tetragonal, 1800K, (Hf-Hf)

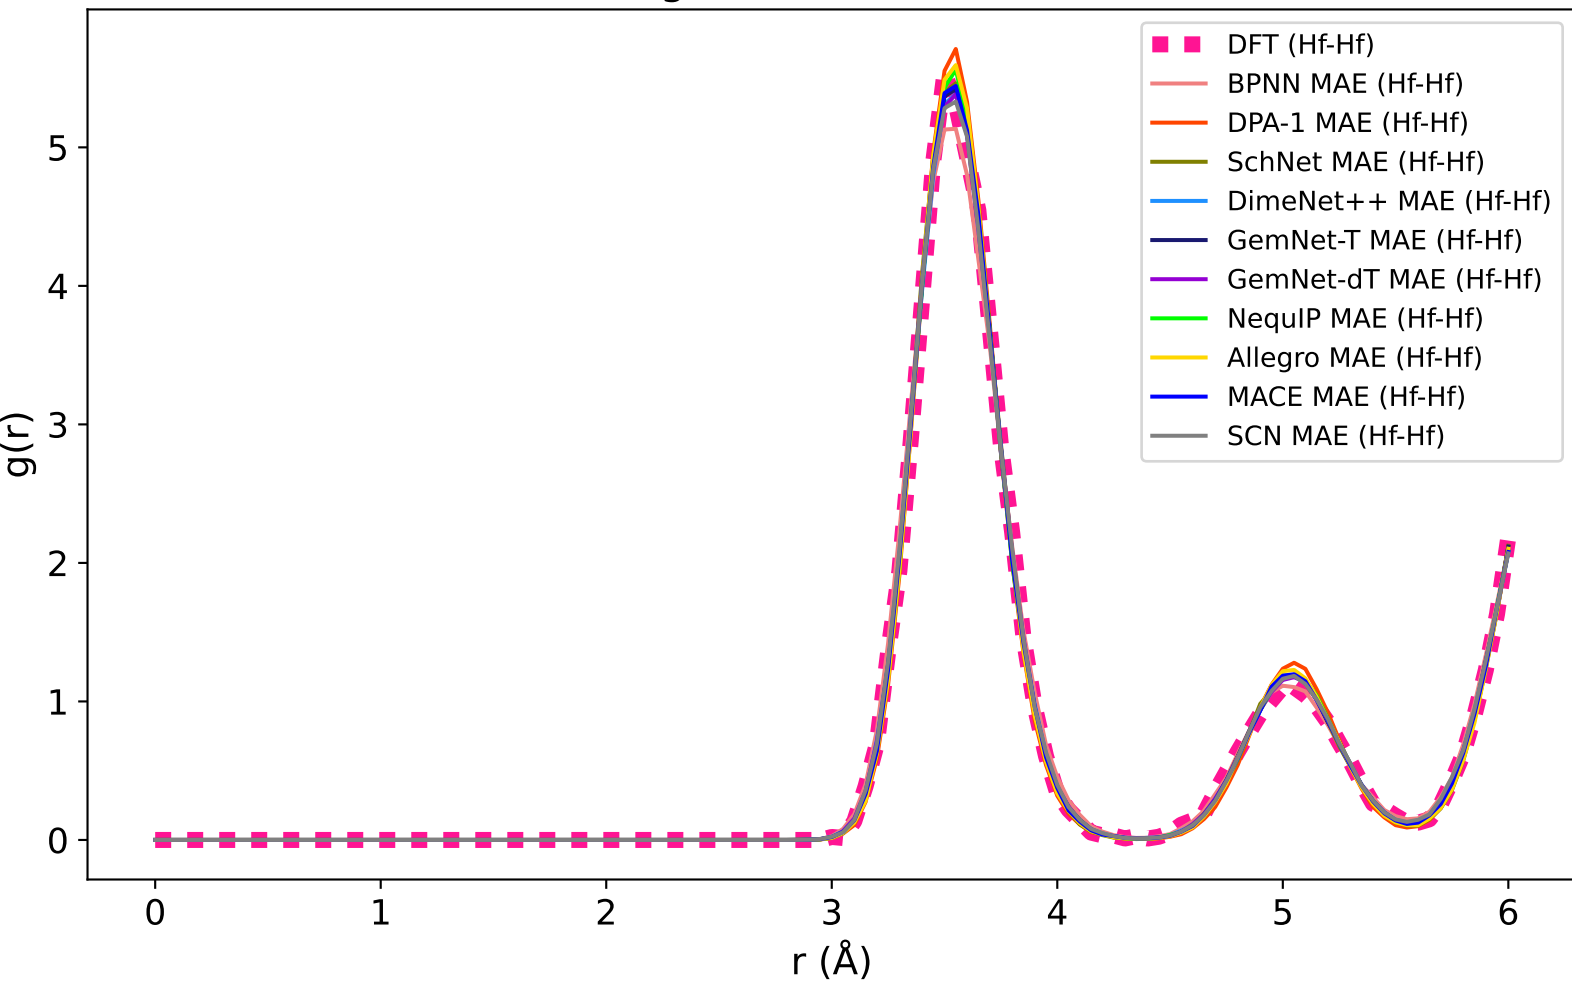

Supplement: supplementary_material [file attachment]

Fm3m, 96 atoms

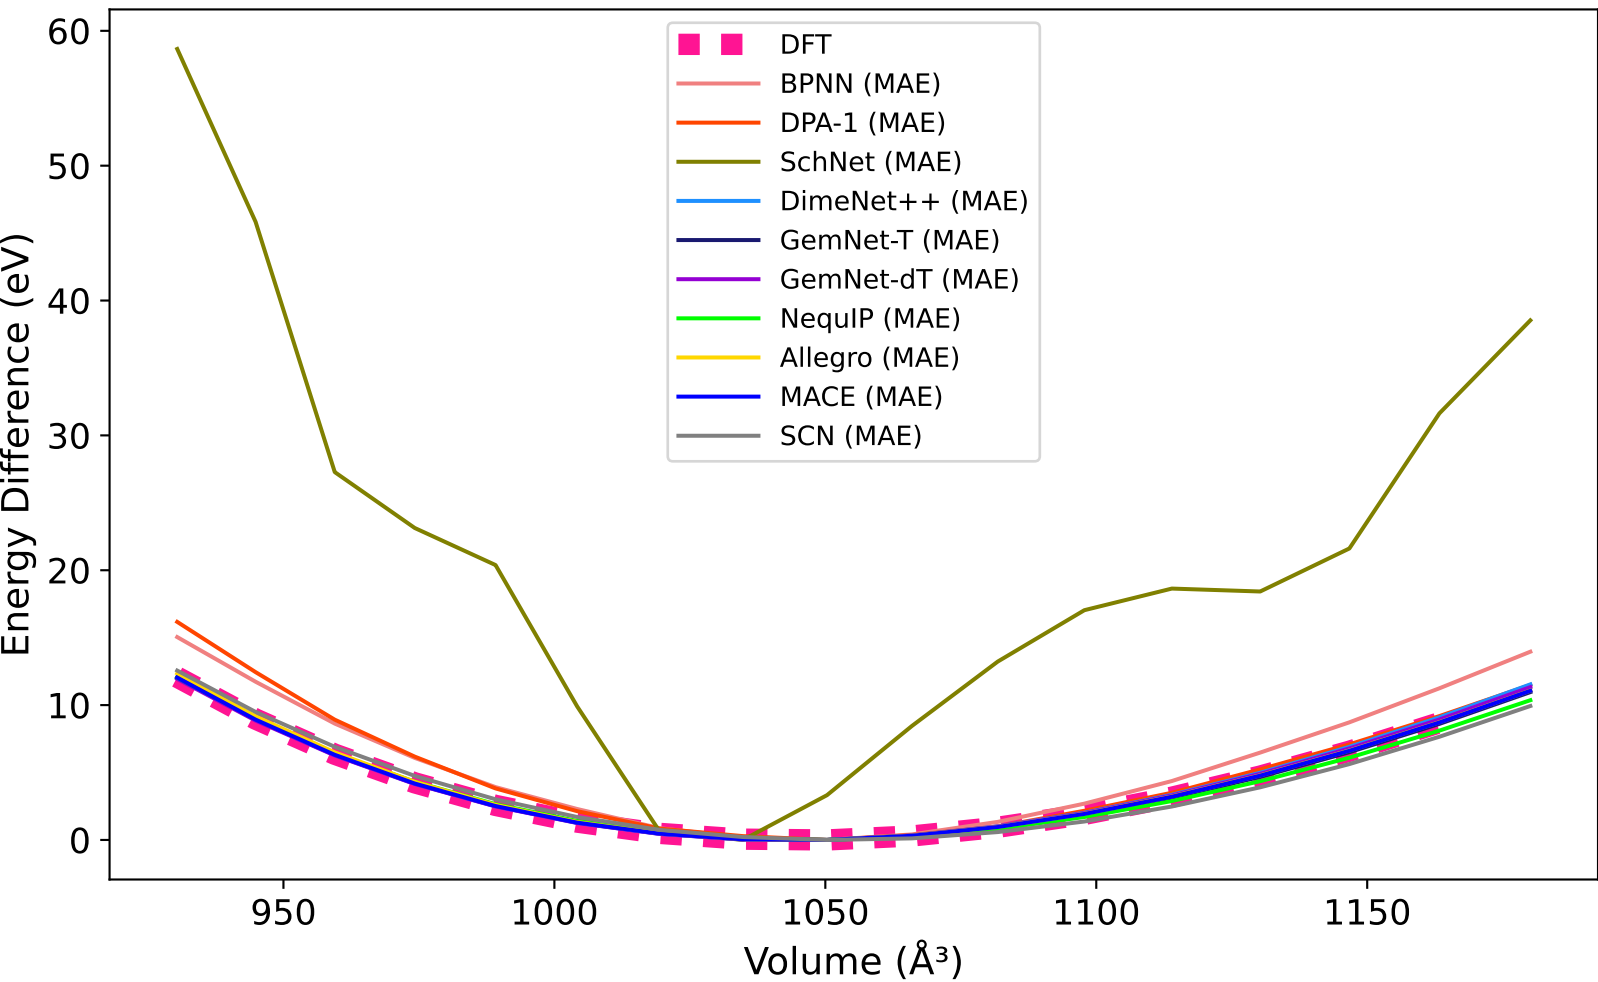

Supplement: supplementary_material [file attachment]

Cubic (2), 1200K, (Hf-Hf)

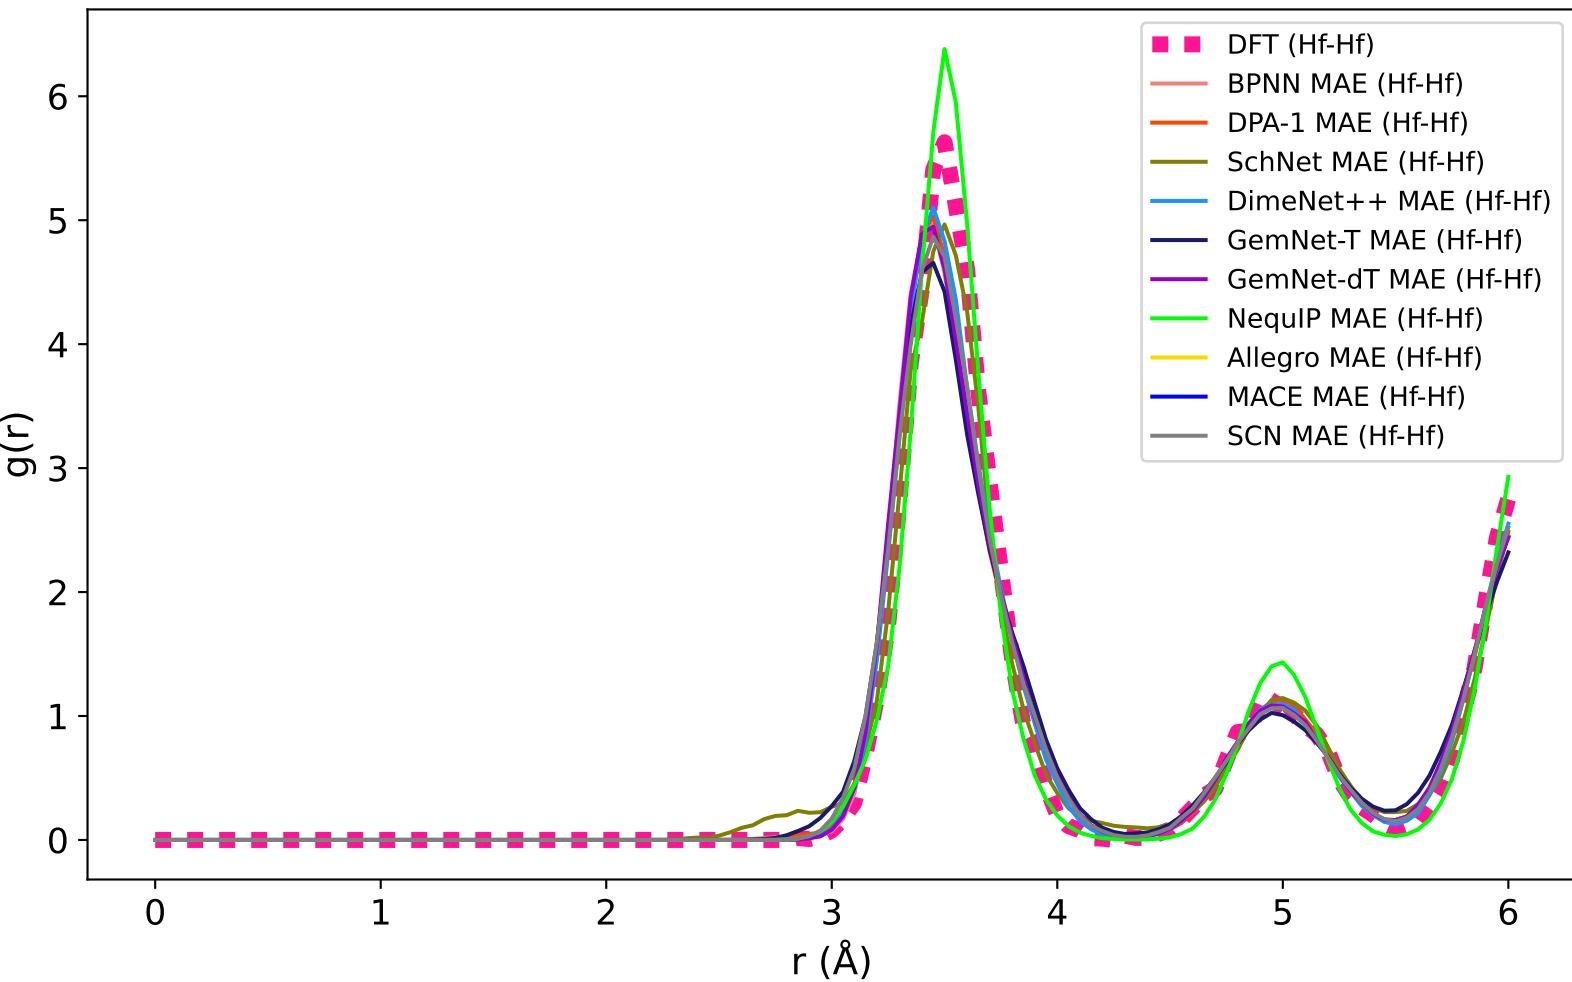

Supplement: supplementary_material [file attachment]

# Monoclinic, 1800K, (Hf-Hf)

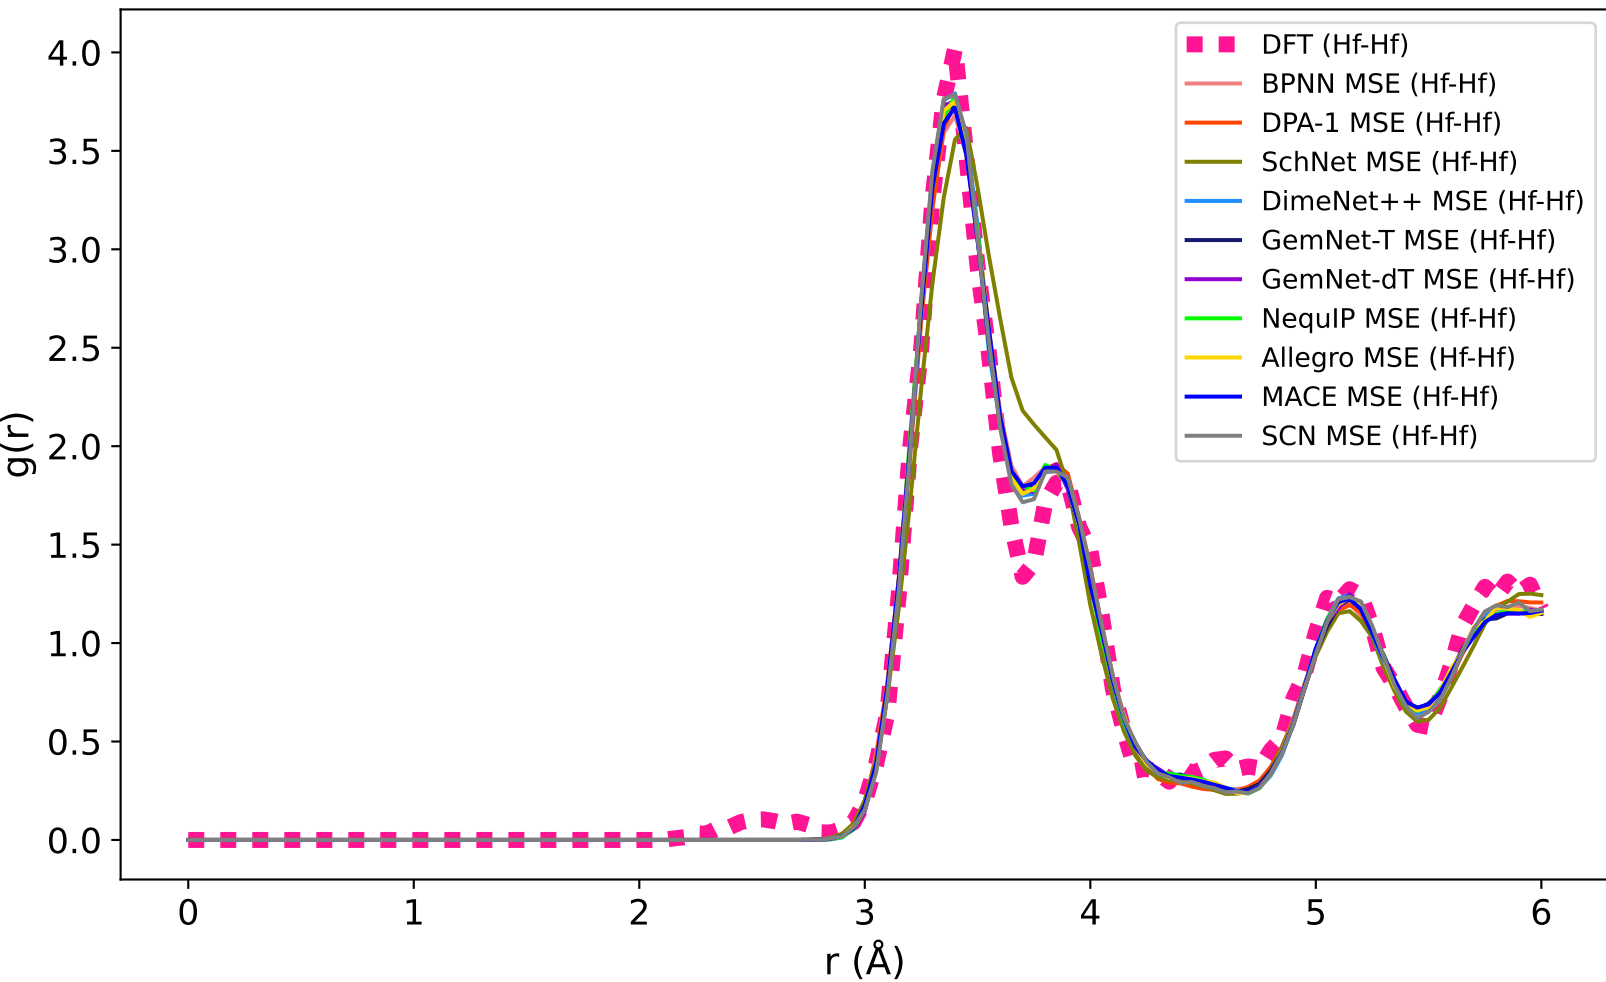

Supplement: supplementary_material [file attachment]

Orthorhombic (2), 1200K, (Hf-O)

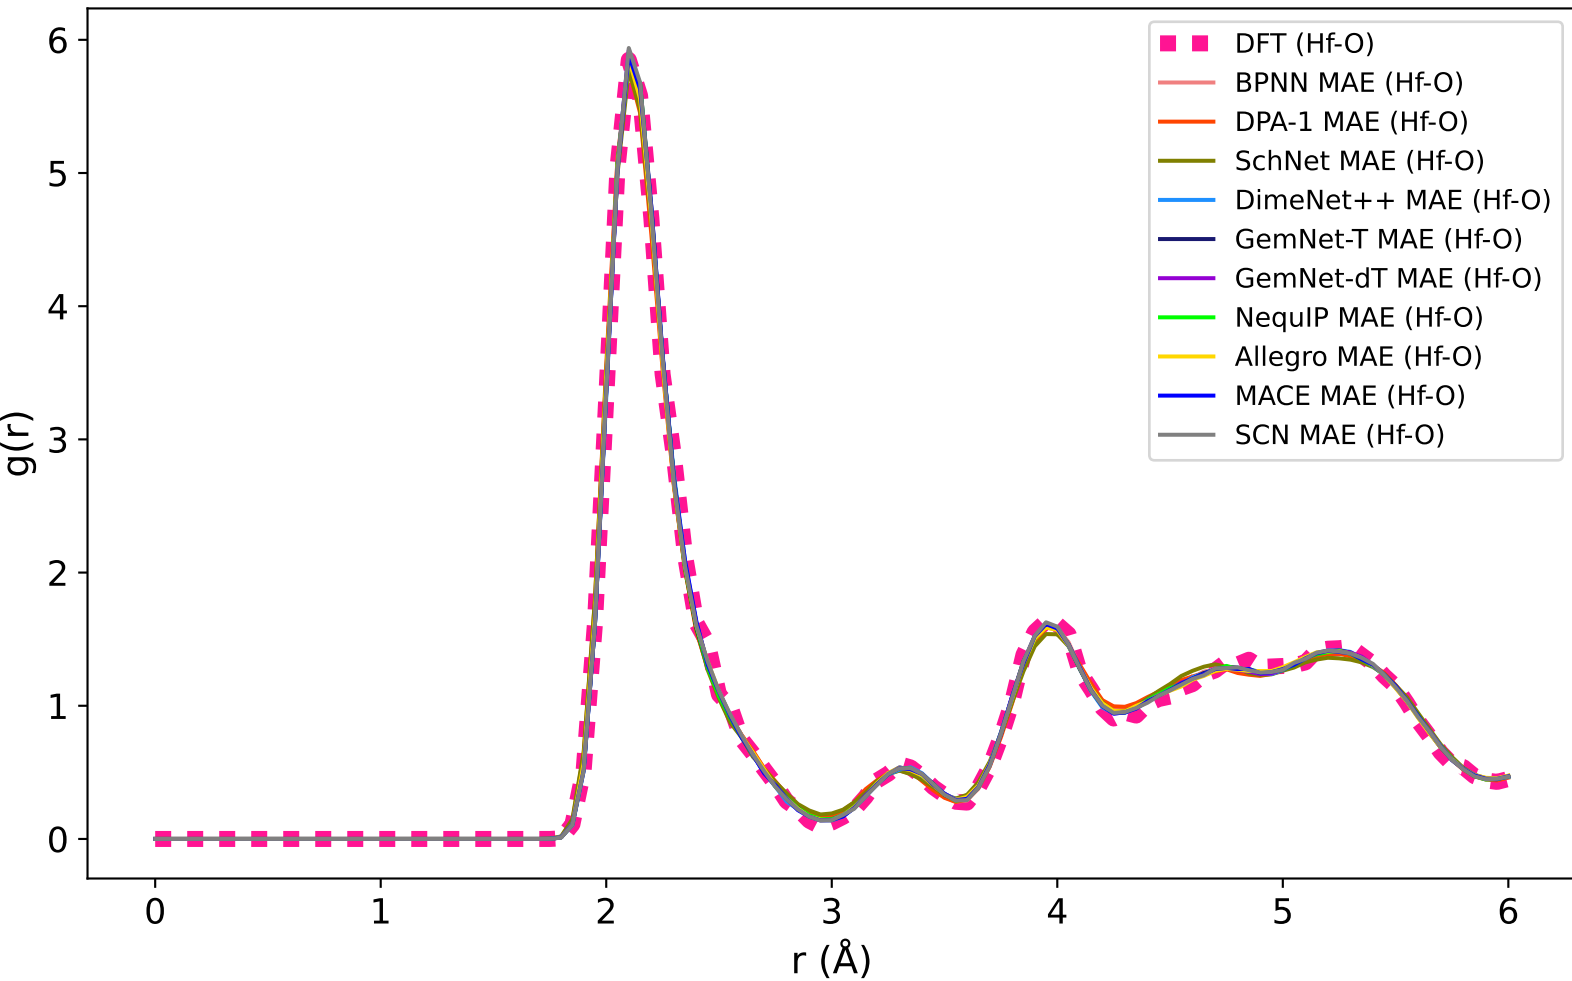

Supplement: supplementary_material [file attachment]

Hexagonal (2), 1200K, (Hf-O)

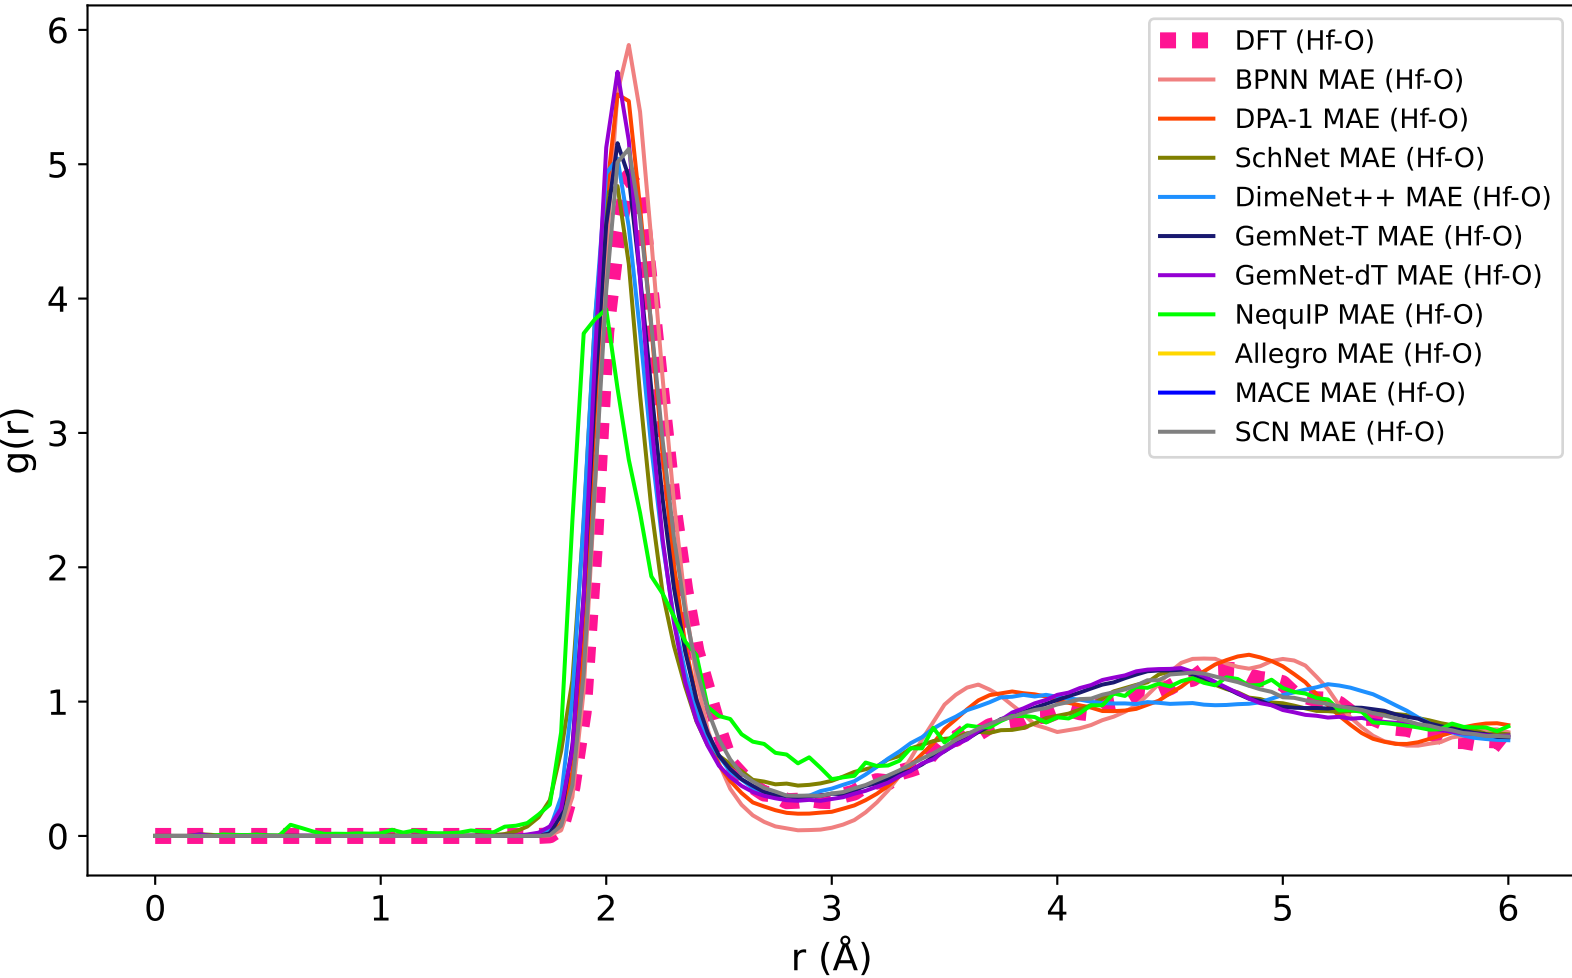

Supplement: supplementary_material [file attachment]

## Hexagonal (1), 1200K, (Hf-O)

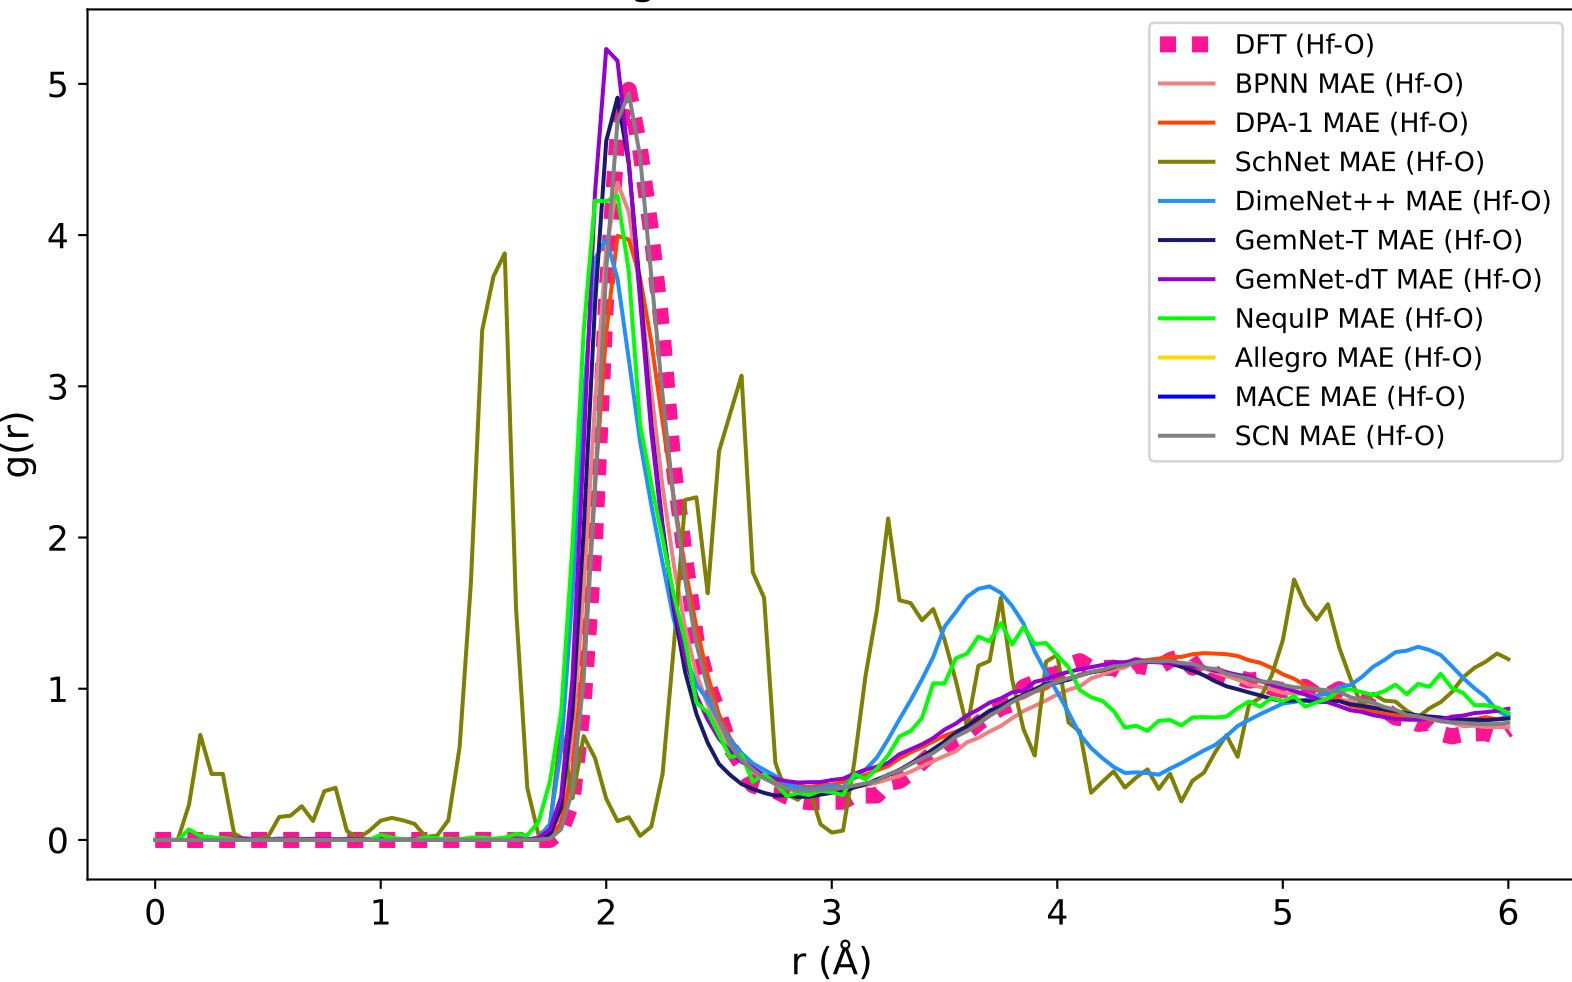

Supplement: supplementary_material [file attachment]

# Monoclinic, 1800K, (O-O)

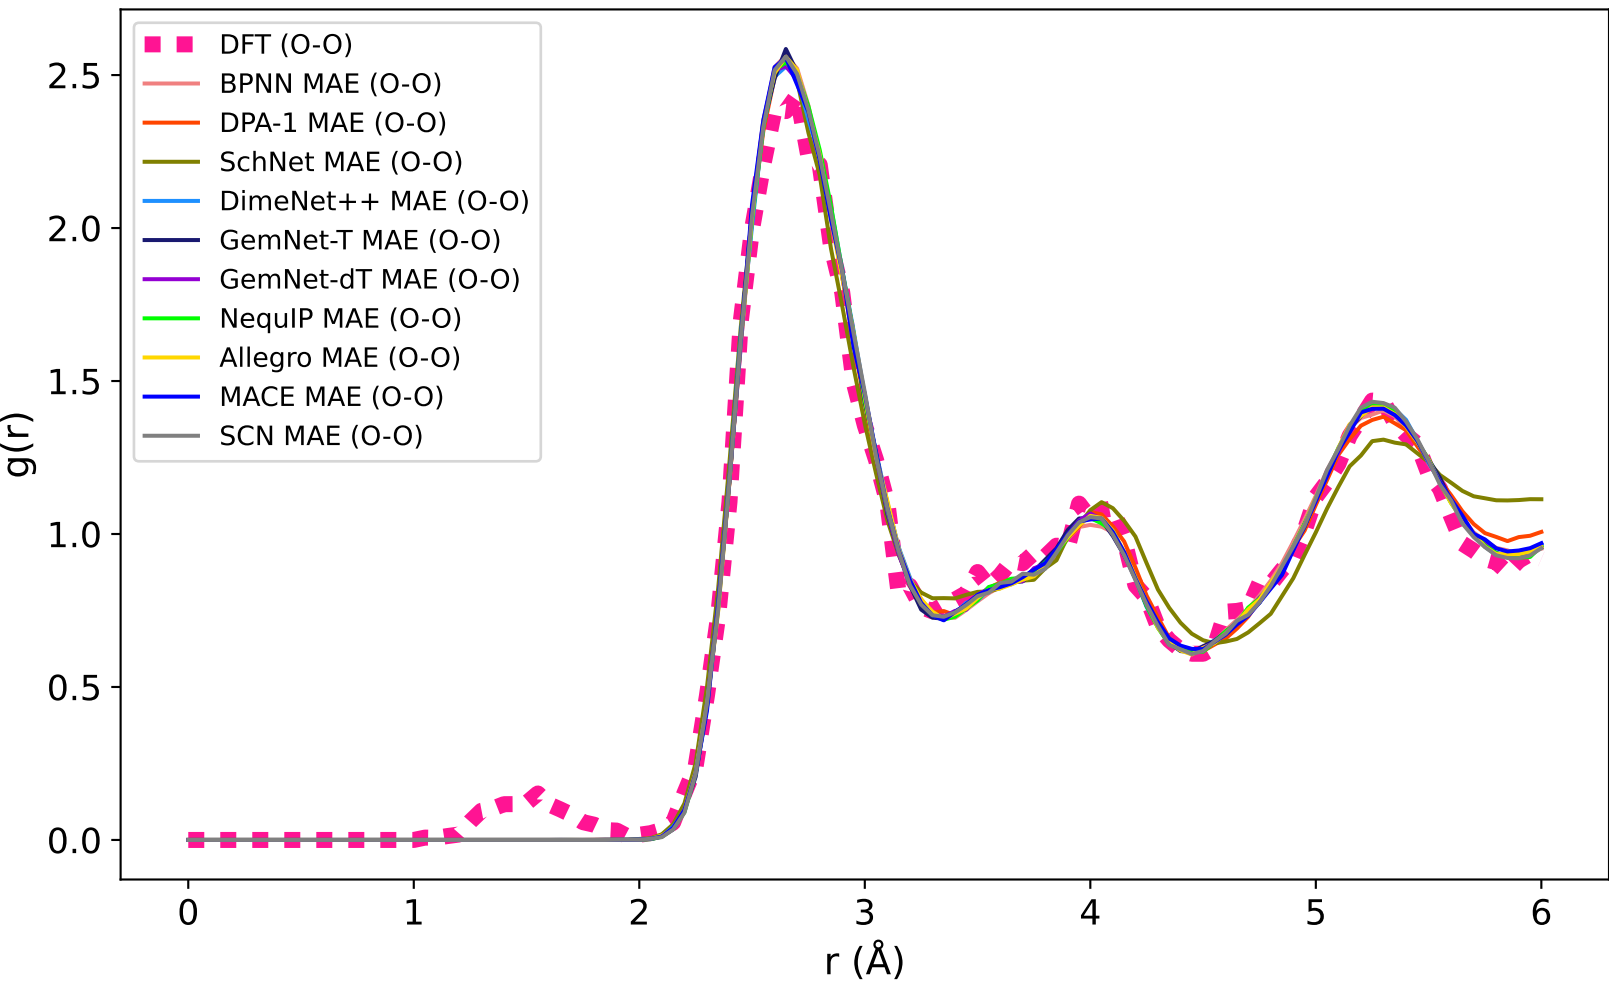

Supplement: supplementary_material [file attachment]

Cubic (1), 1800K, (Hf-O)

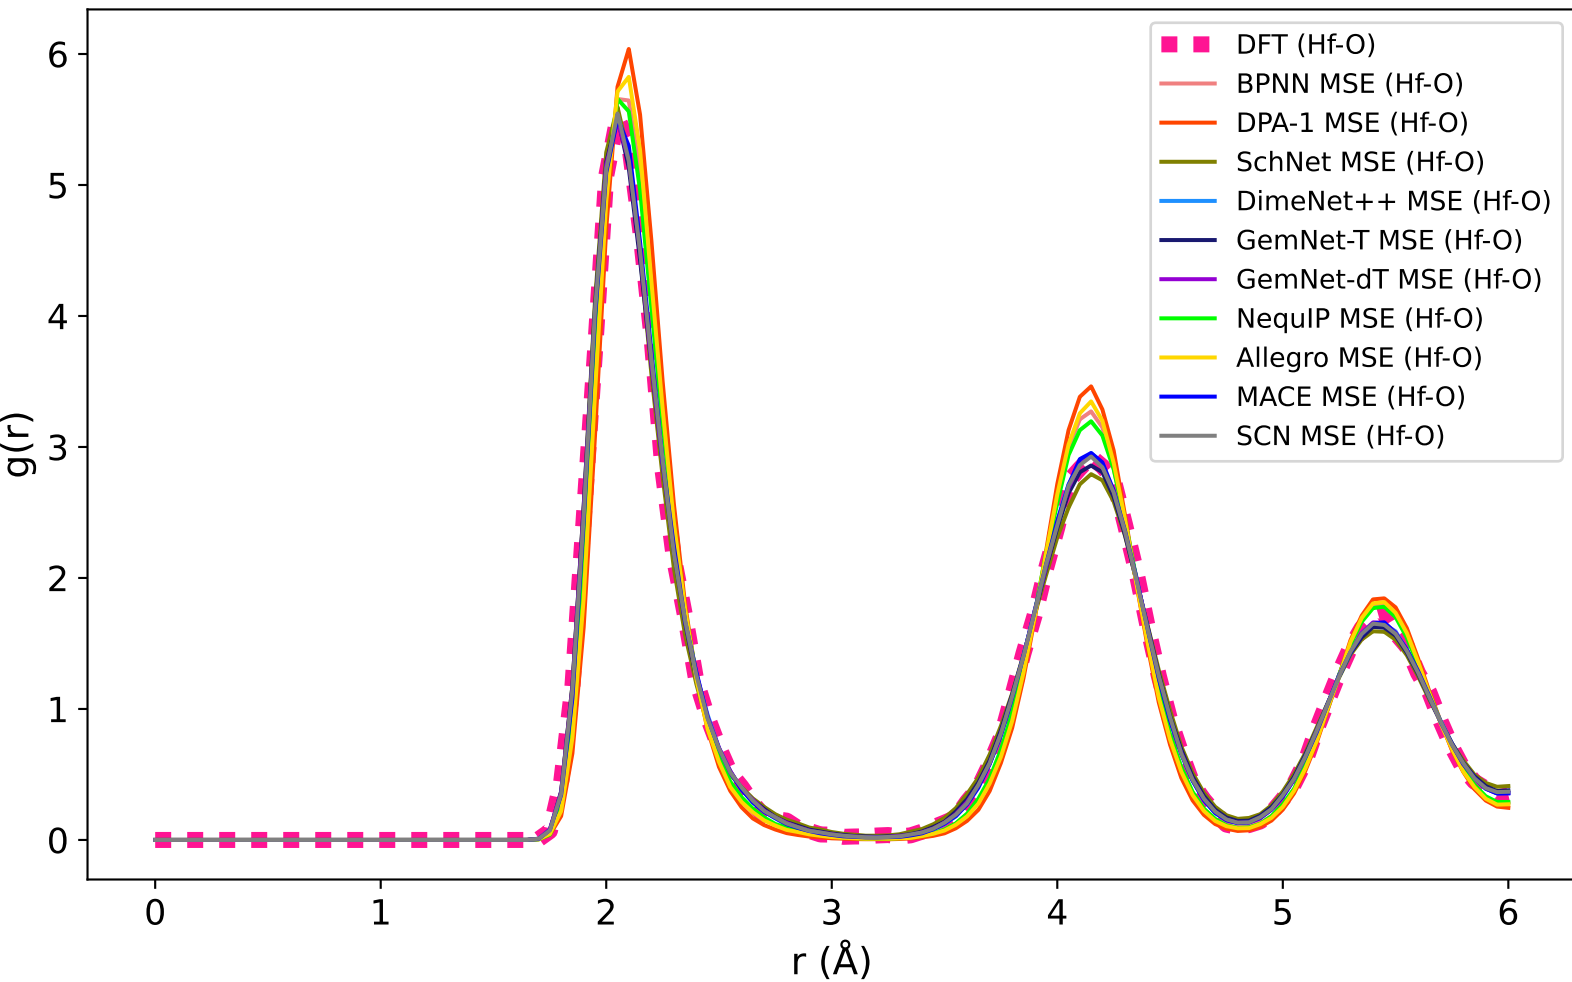

Supplement: supplementary_material [file attachment]

## Orthorhombic (1), 1200K, (Hf-Hf)

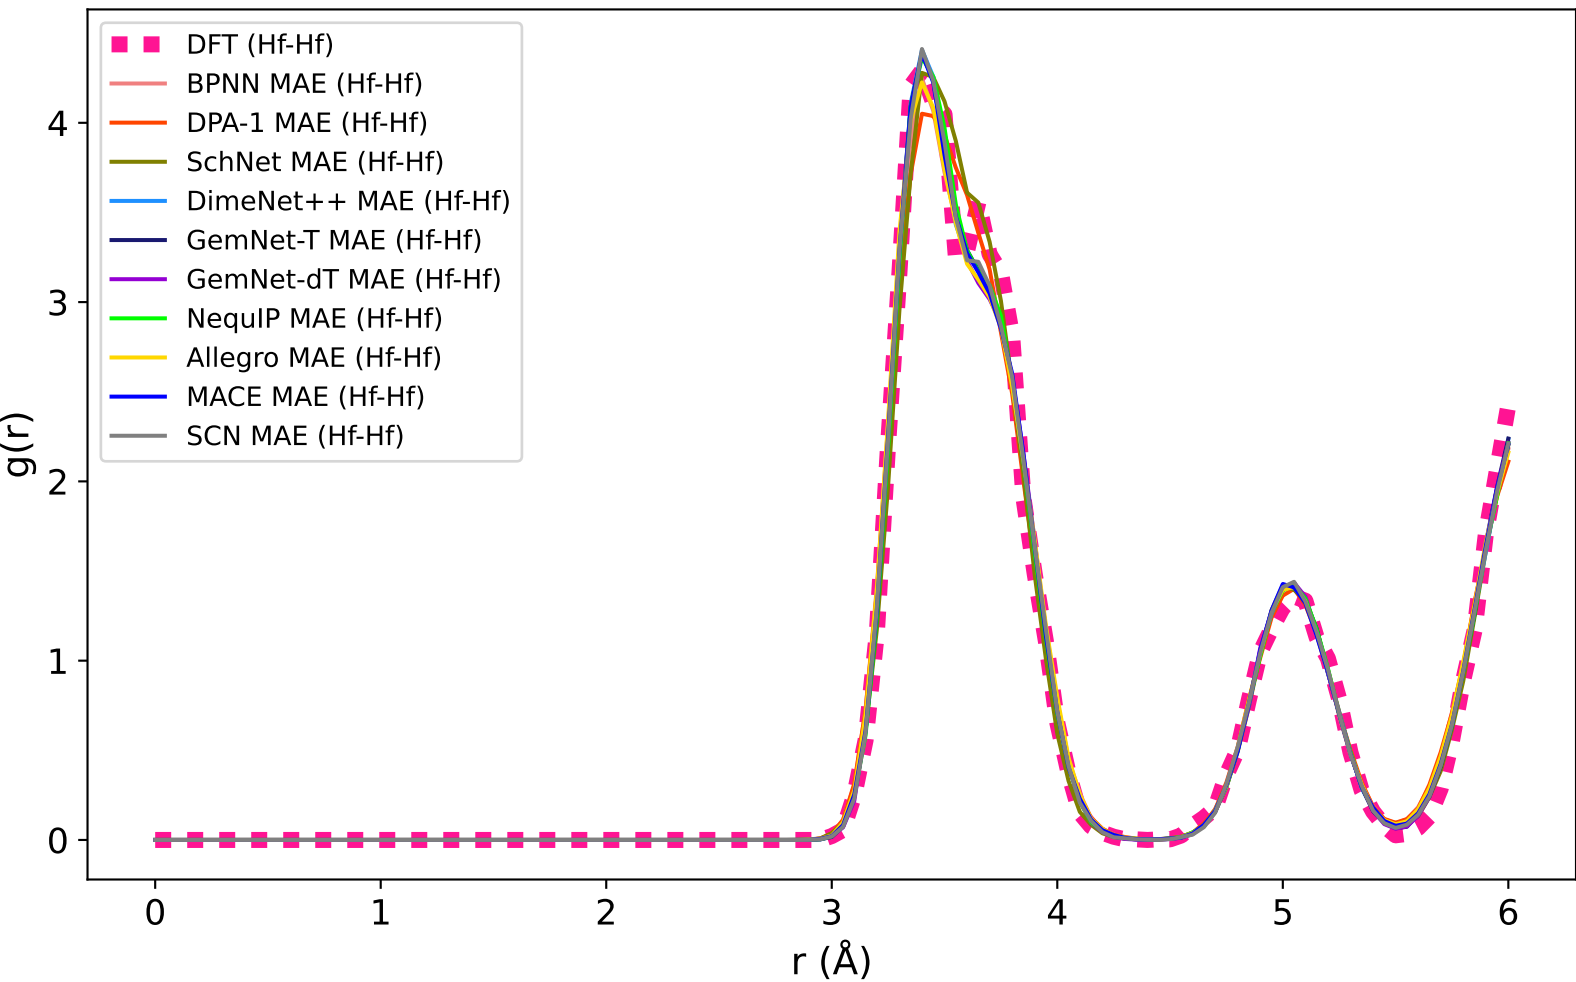

Supplement: supplementary_material [file attachment]

Orthorhombic (1), 1200K, (Hf-O)

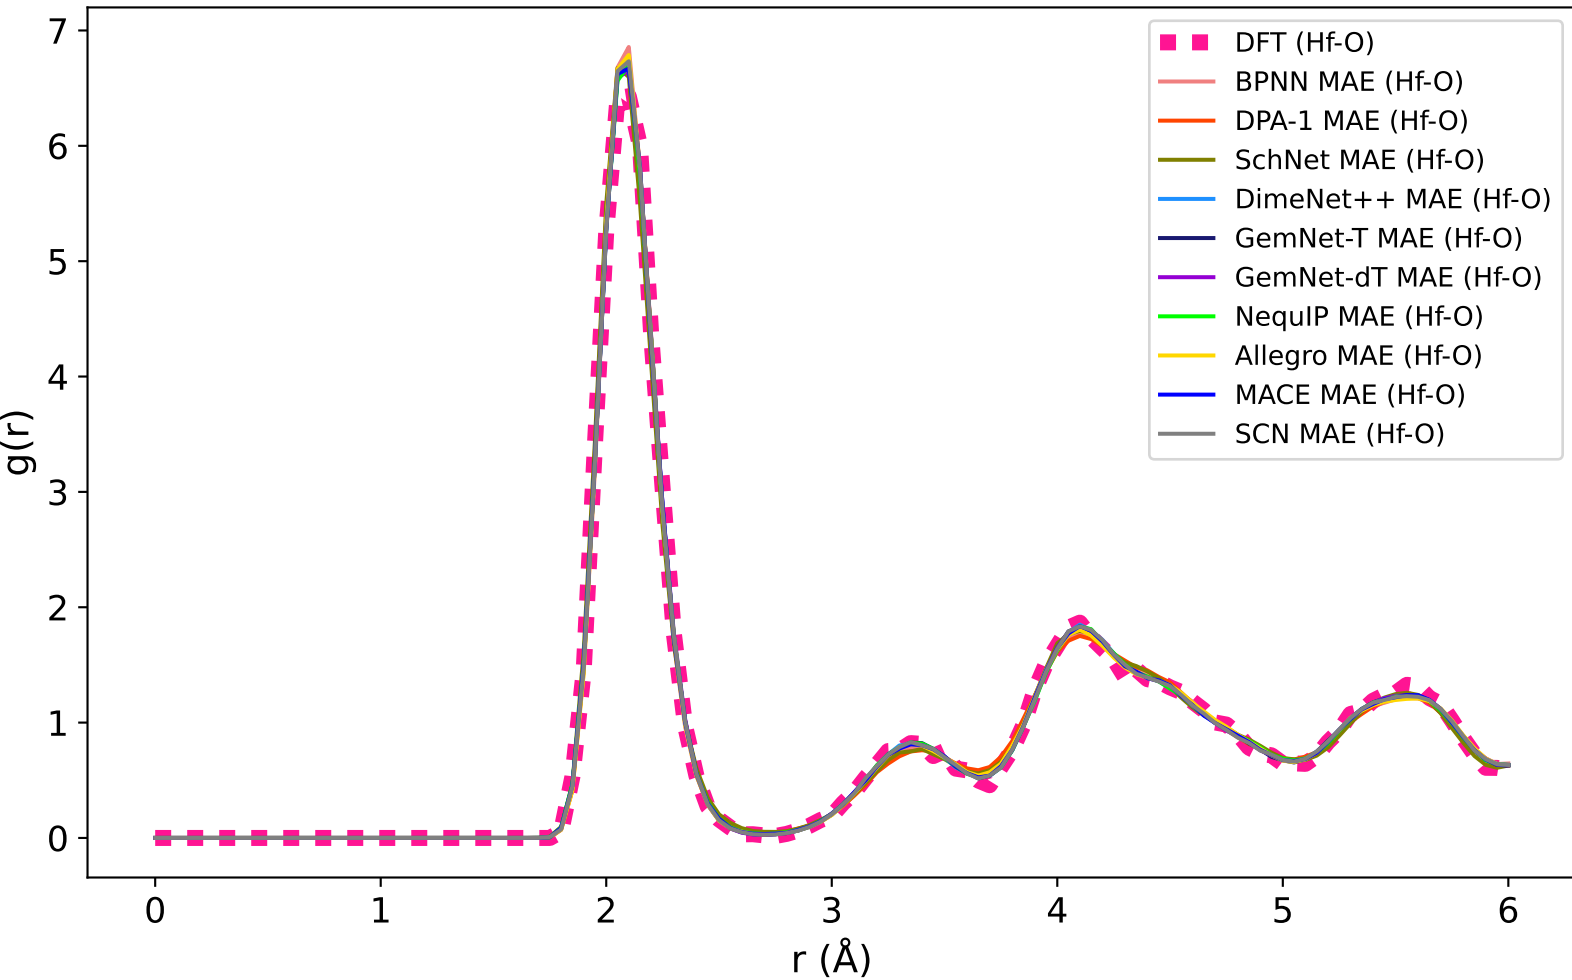

Supplement: supplementary_material [file attachment]

# Orthorhombic (1), 1800K, (O-O)

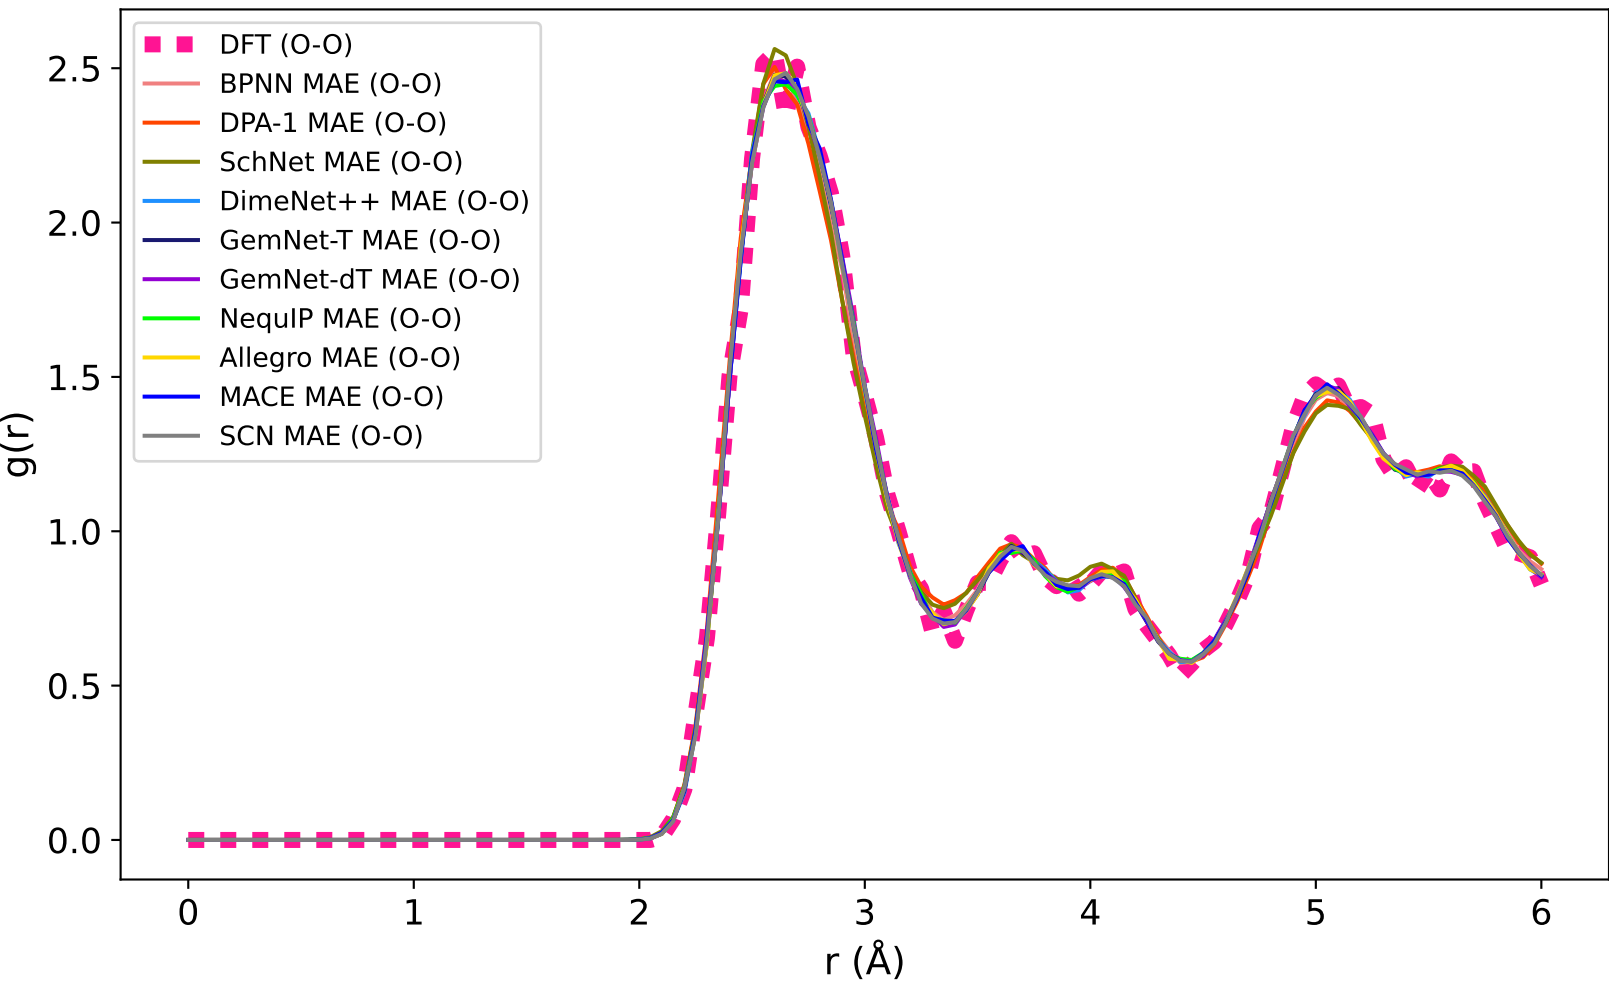

Supplement: supplementary_material [file attachment]

Fd3m, 88 atoms

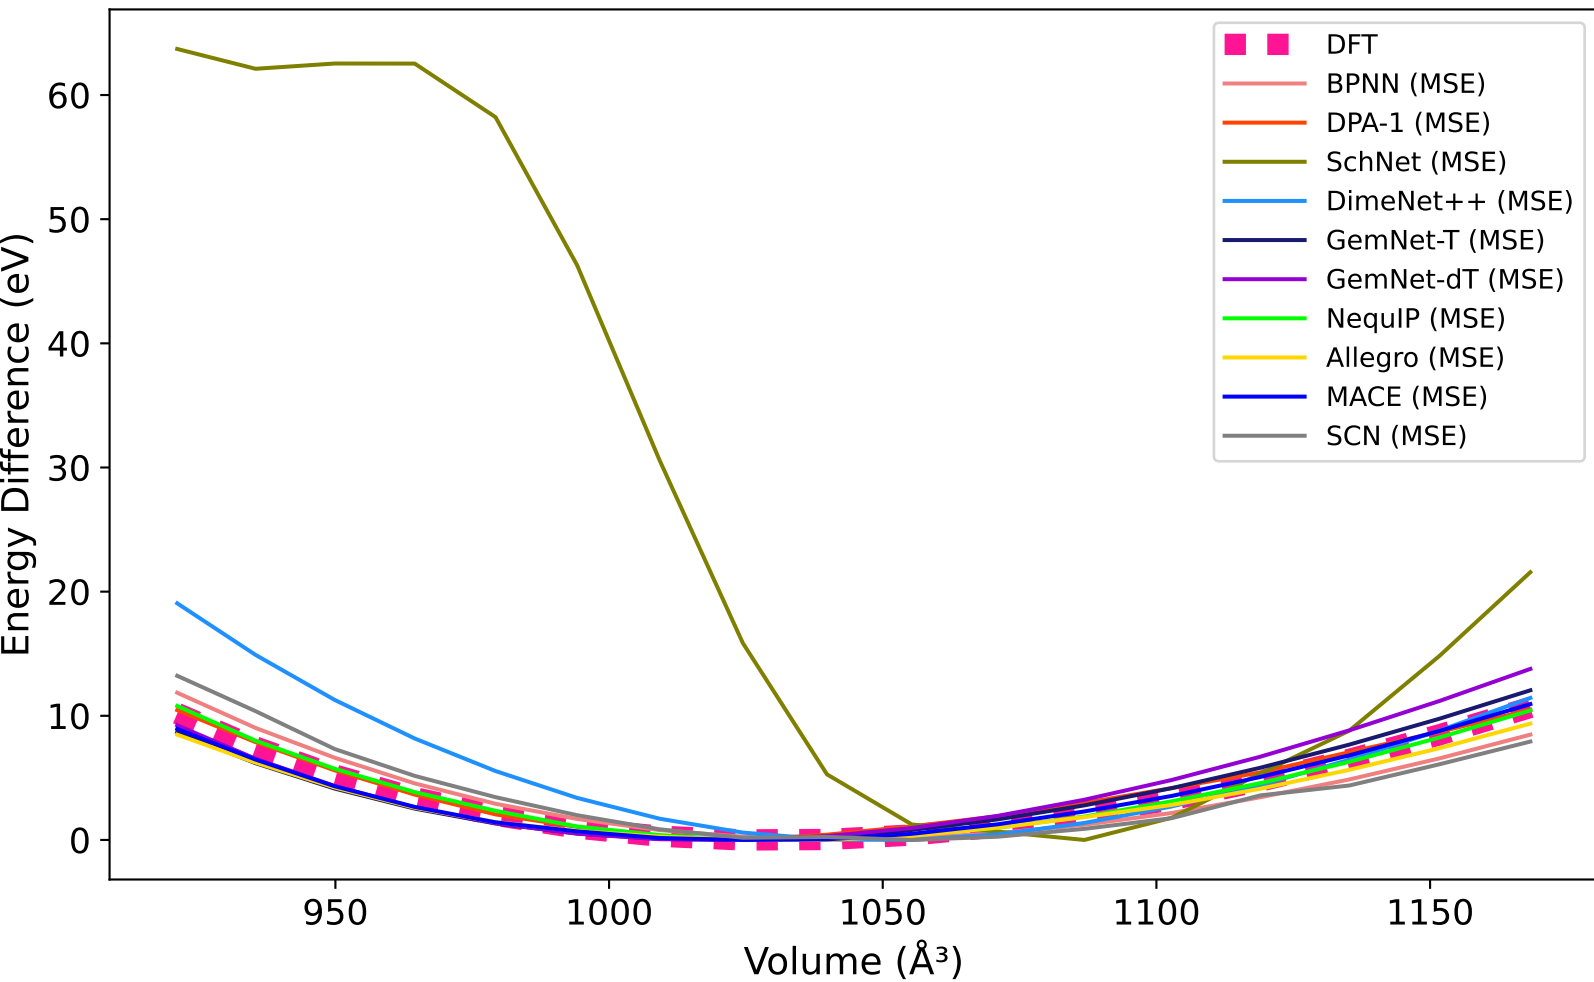

Supplement: supplementary_material [file attachment]

## Tetragonal, 1200K, (O-O)

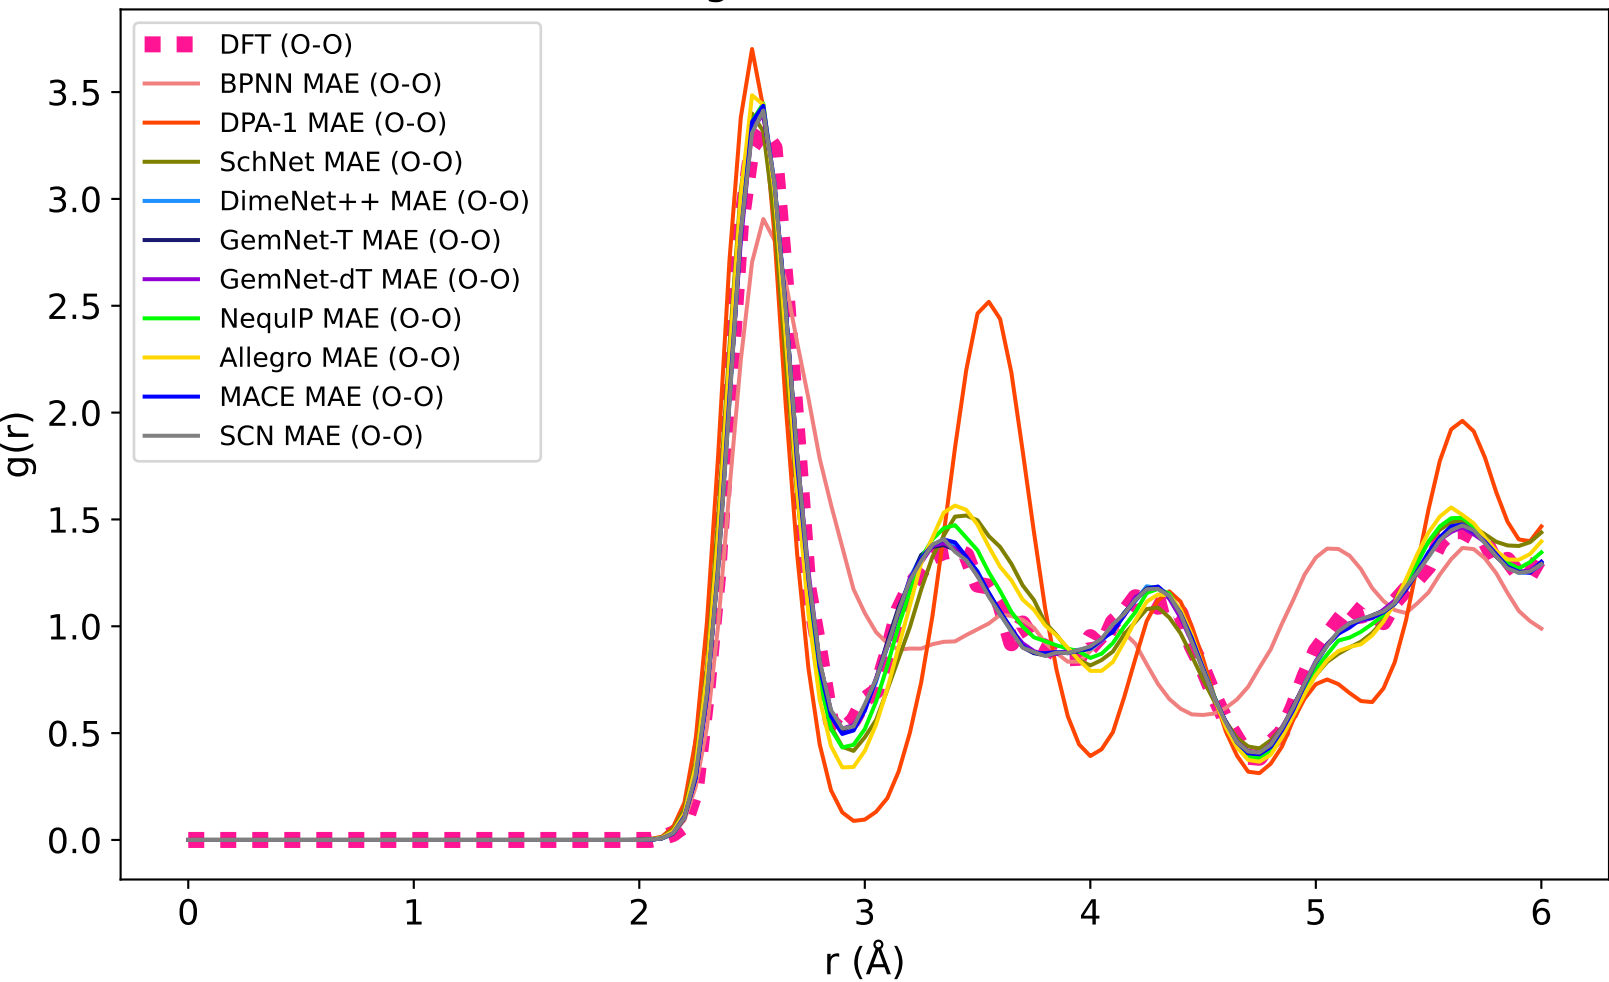

Supplement: supplementary_material [file attachment]

Hexagonal (1), 1200K, (Hf-O)

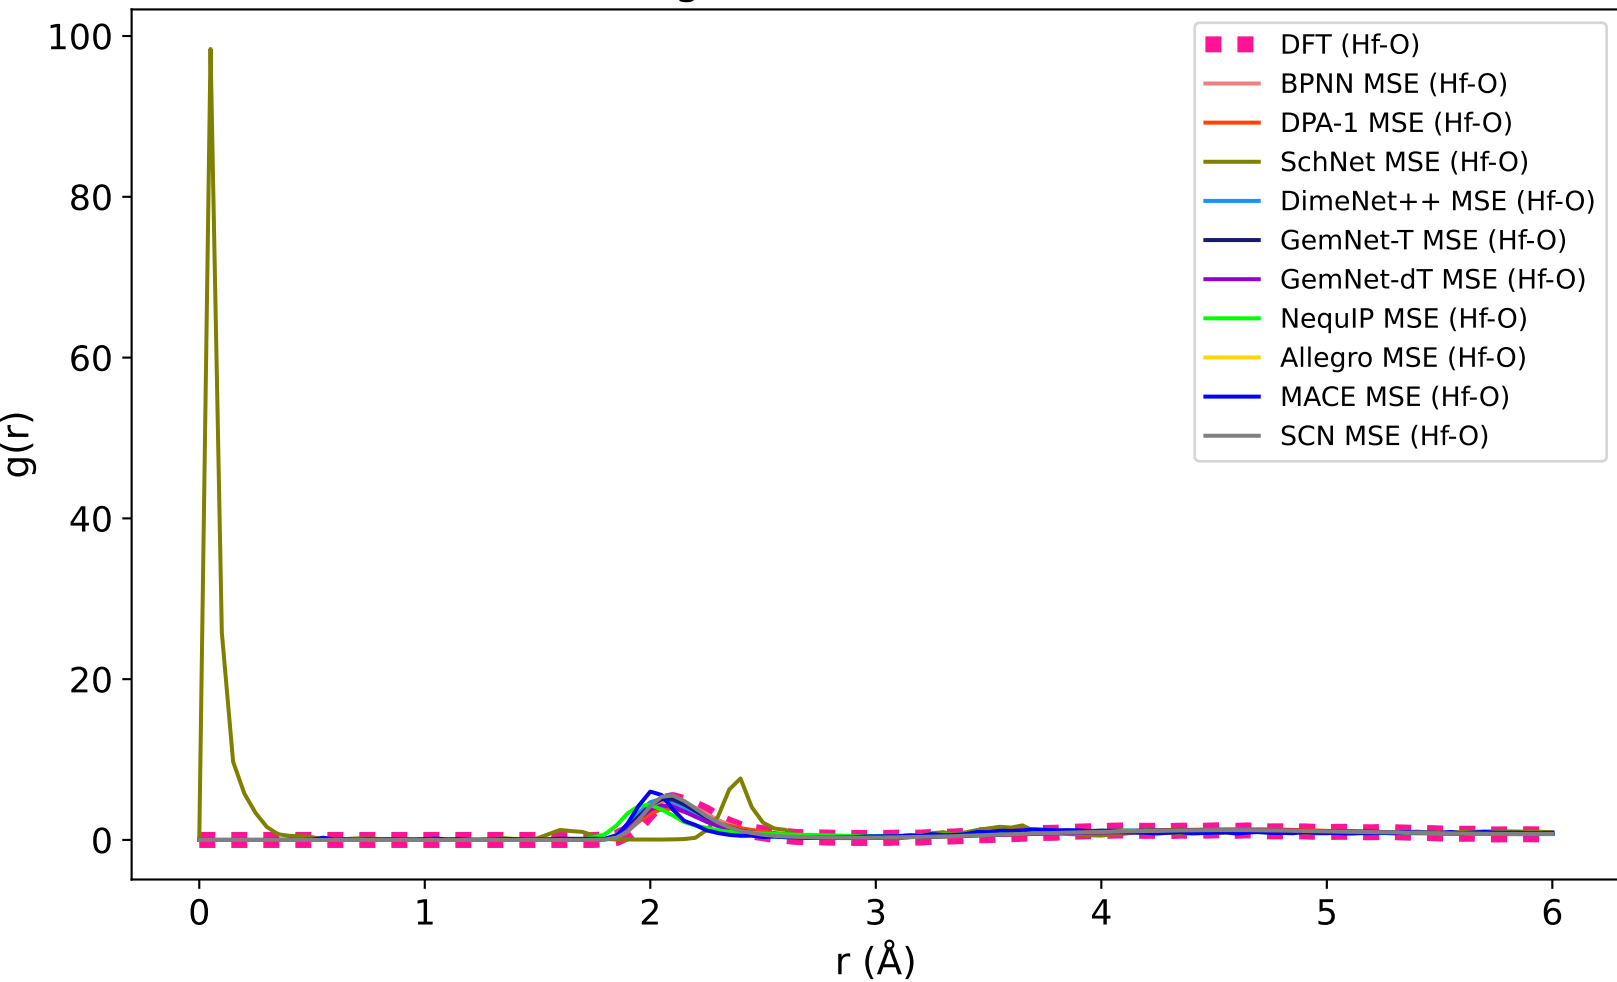

Supplement: supplementary_material [file attachment]

Cubic (1), 1800K, (Hf-Hf)

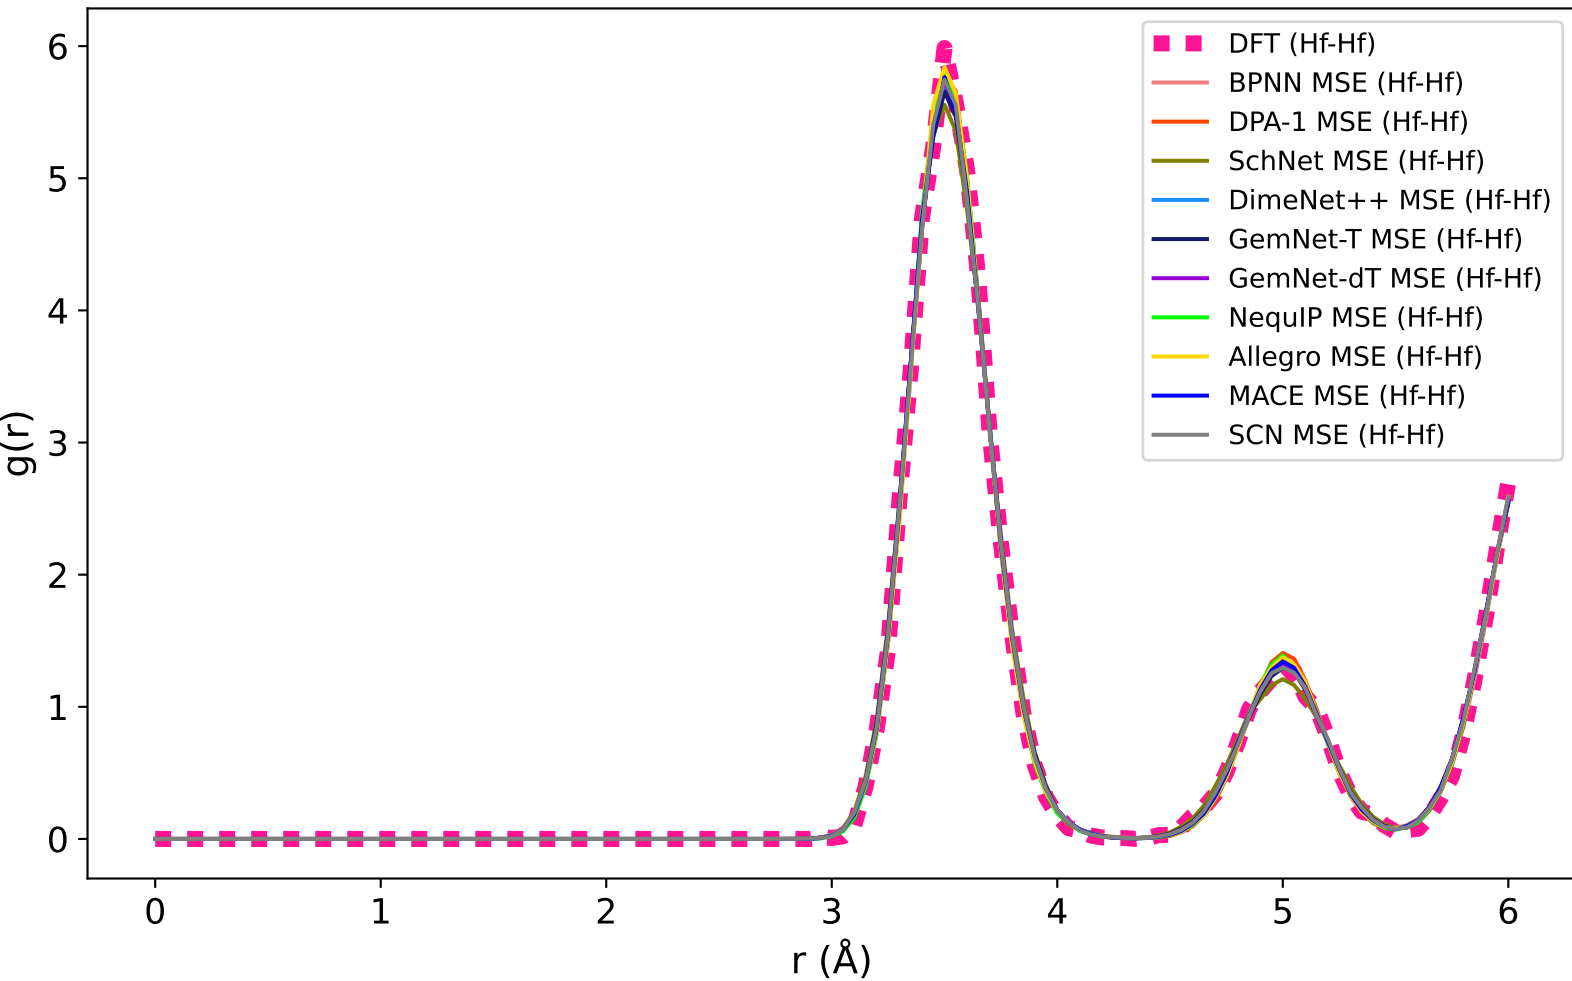

Supplement: supplementary_material [file attachment]

Cubic (2), 1200K, (N-N)

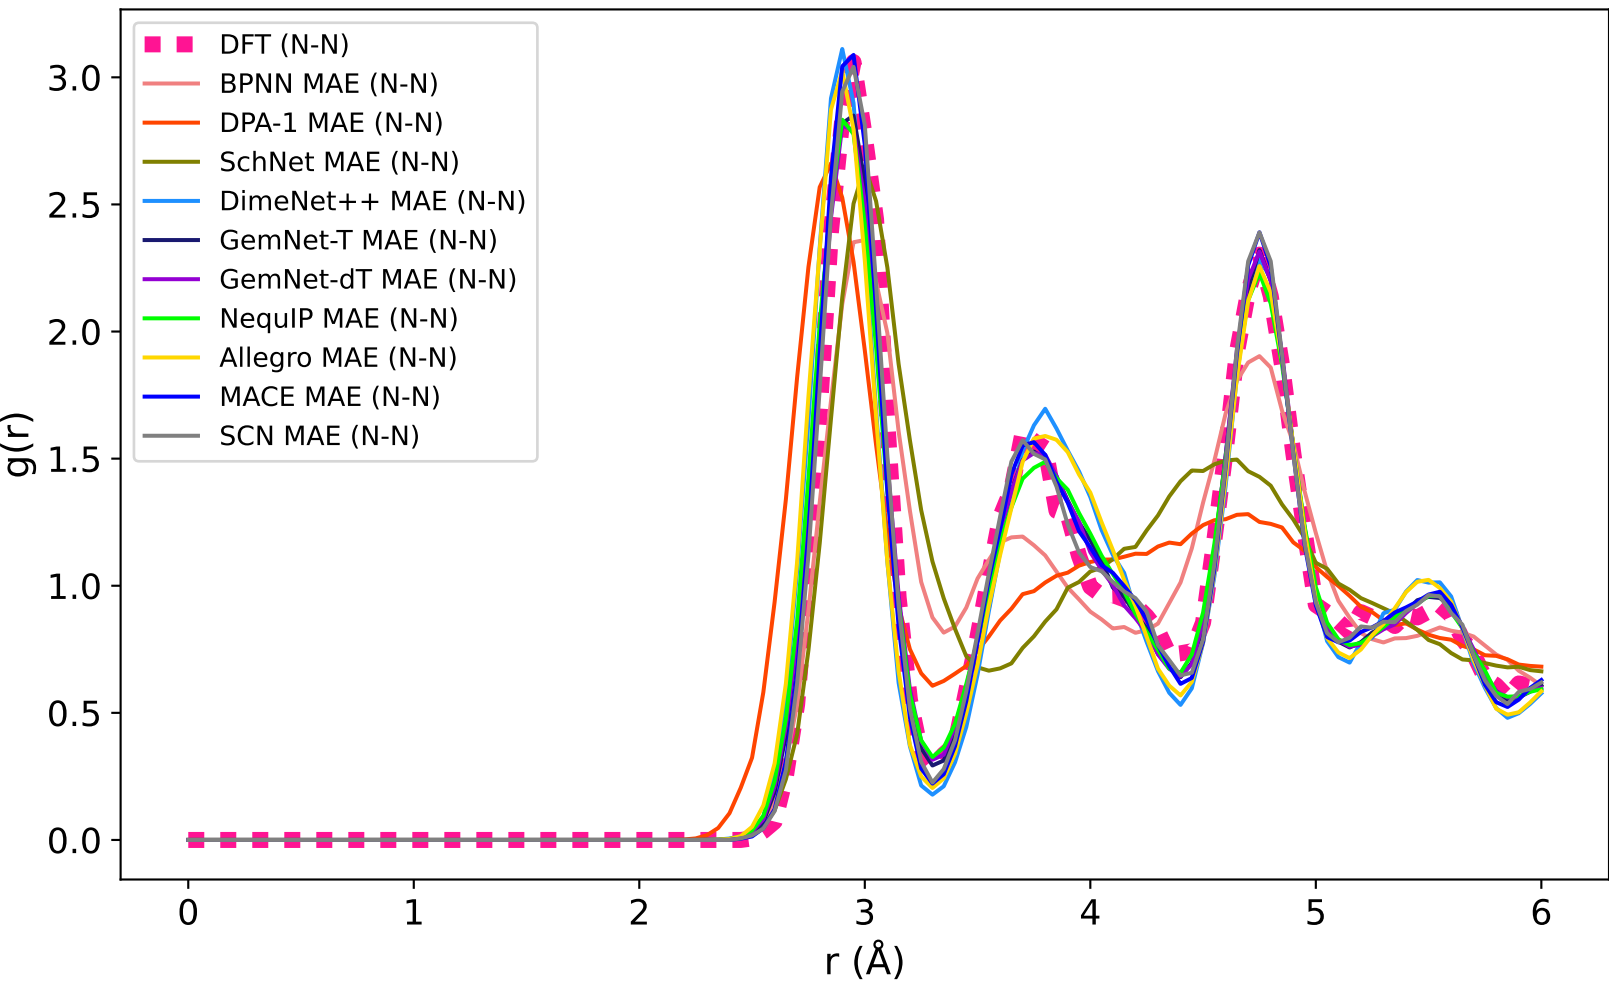

Supplement: supplementary_material [file attachment]

# Monoclinic, 1200K, (Hf-Hf)

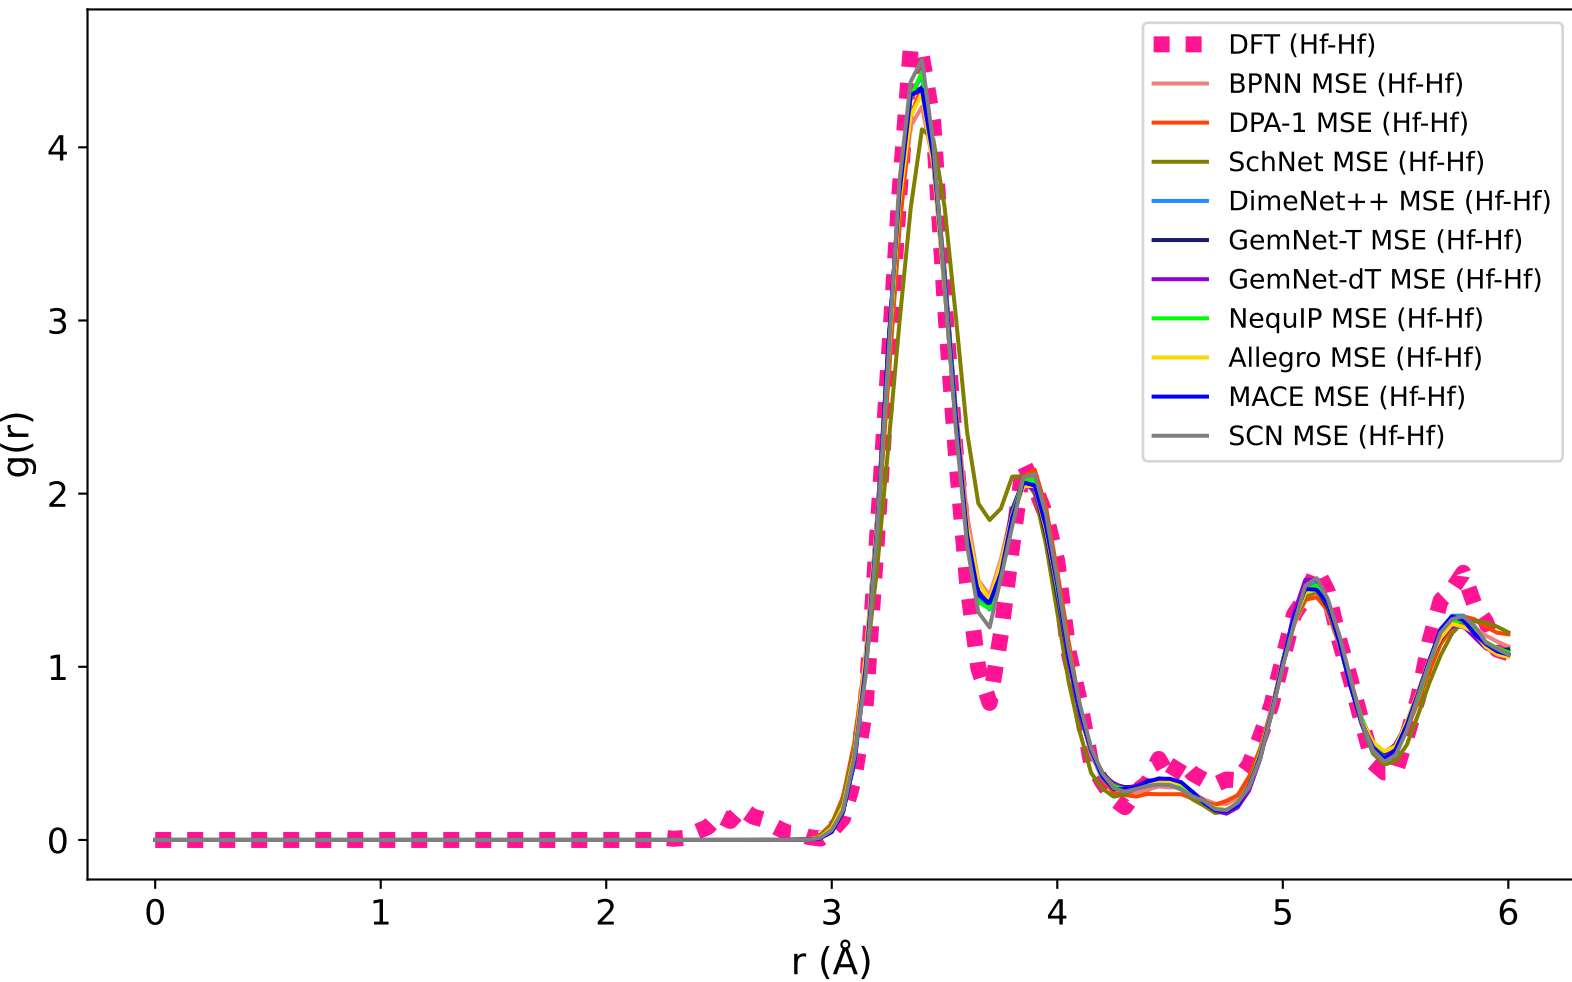

Supplement: supplementary_material [file attachment]

Orthorhombic (2), 1200K, (O-O)

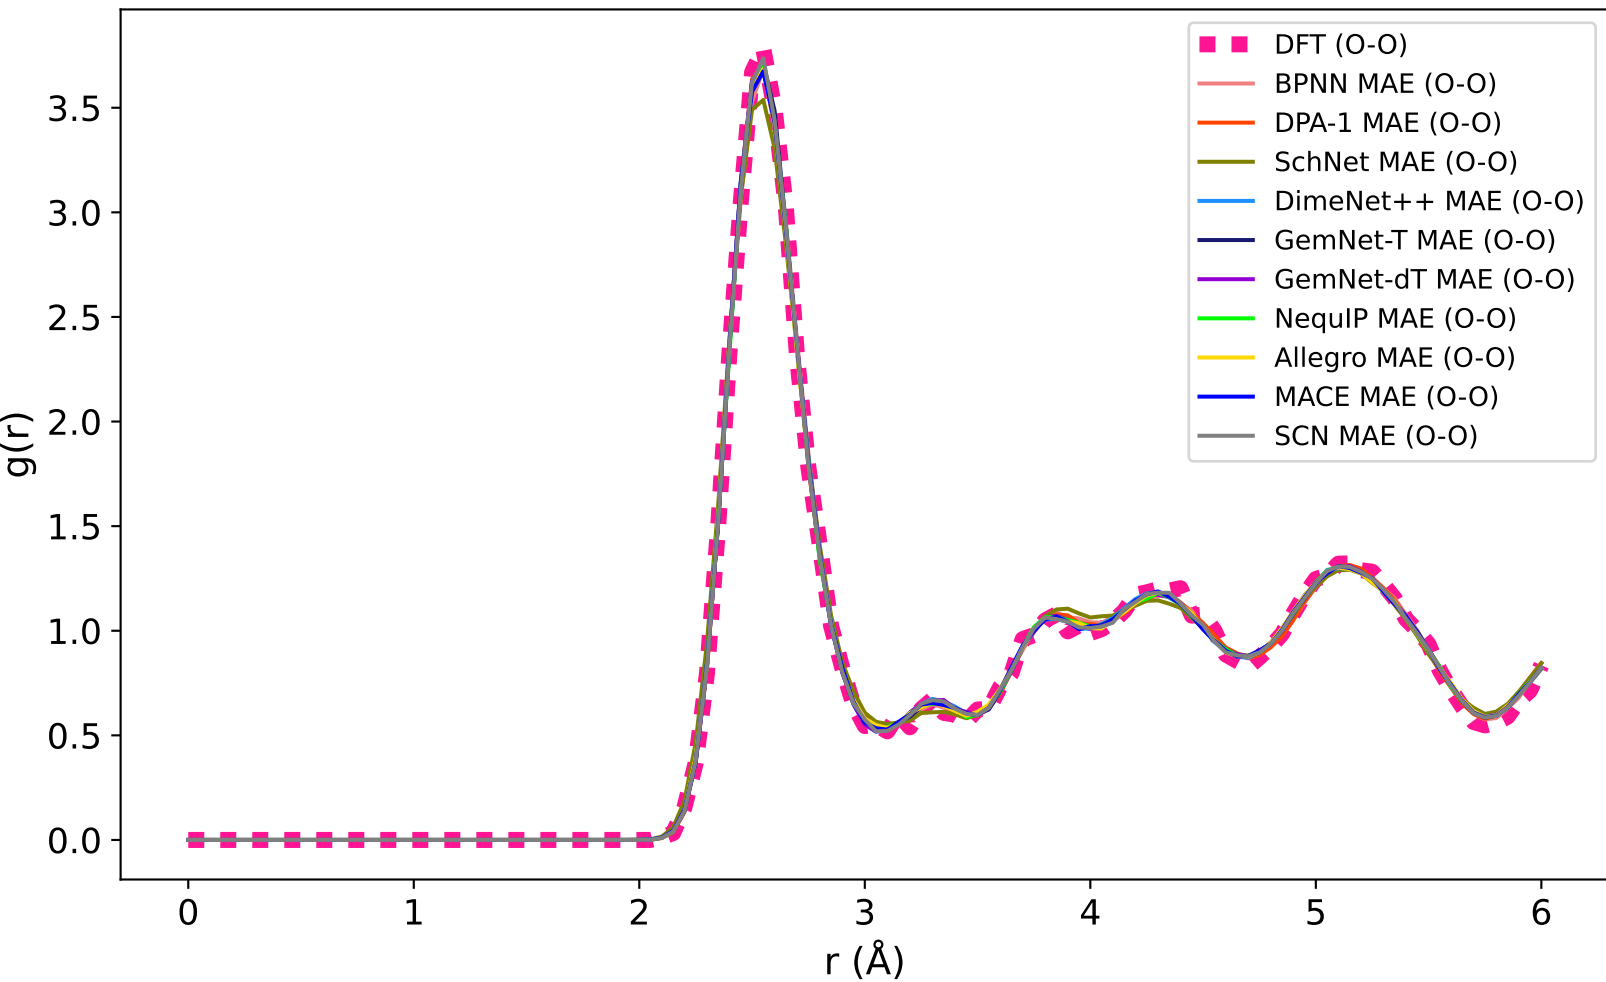

Supplement: supplementary_material [file attachment]

# P1, 28 atoms

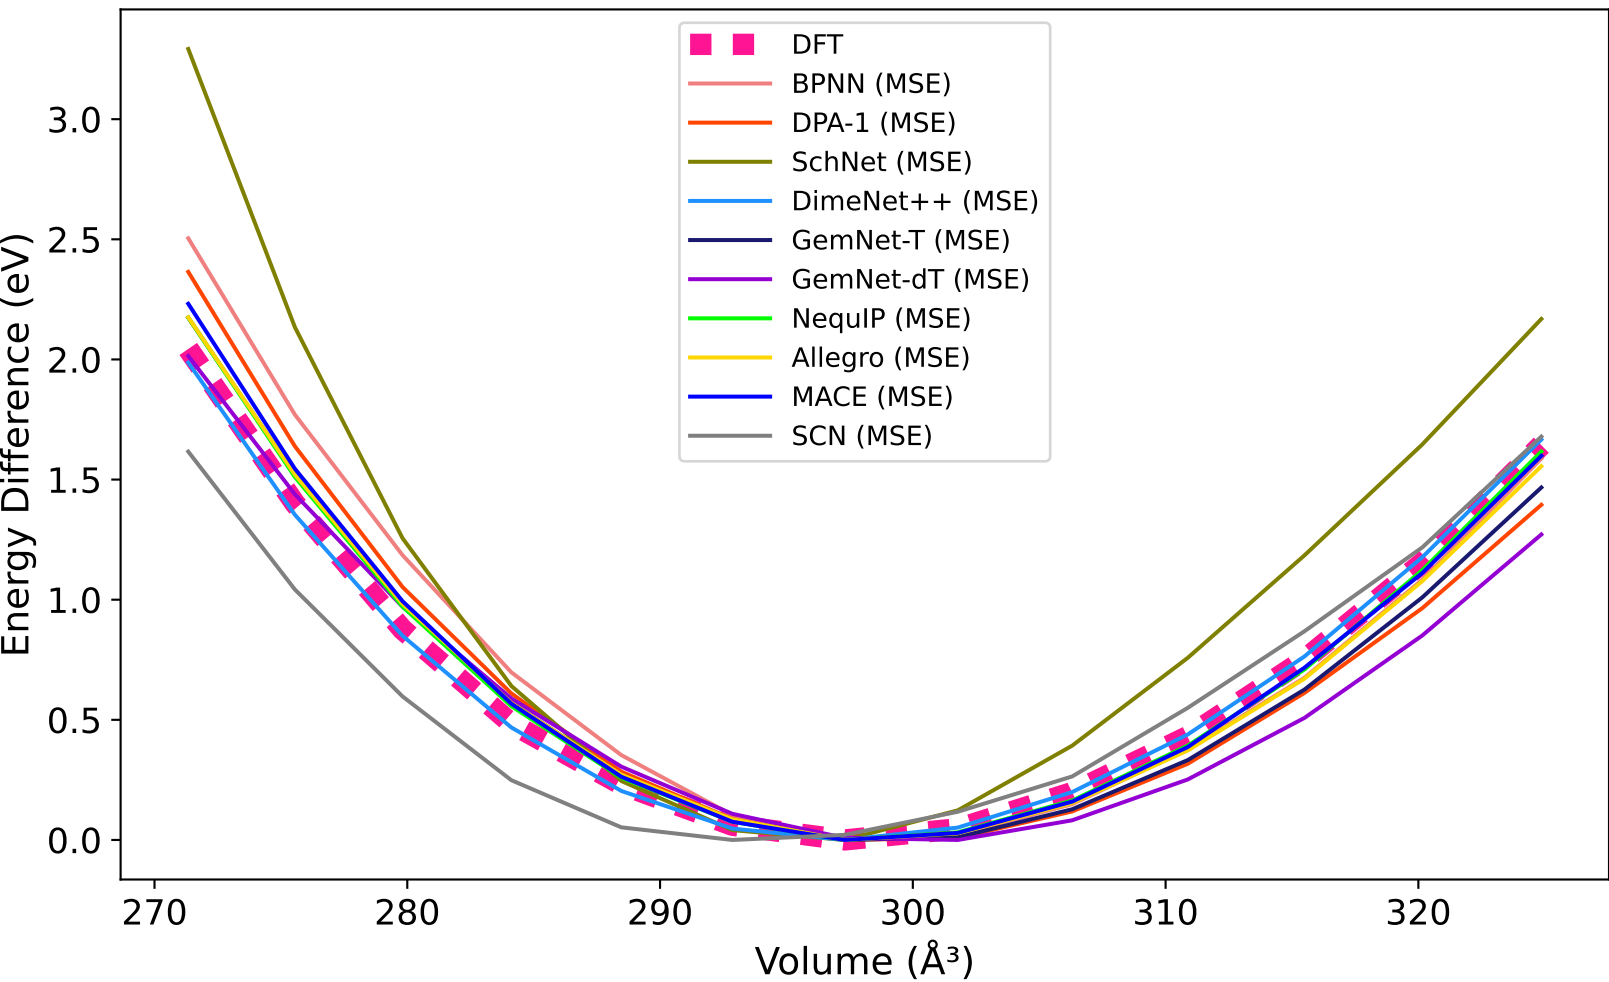

Supplement: supplementary_material [file attachment]

# Tetragonal, 1800K, (O-O)

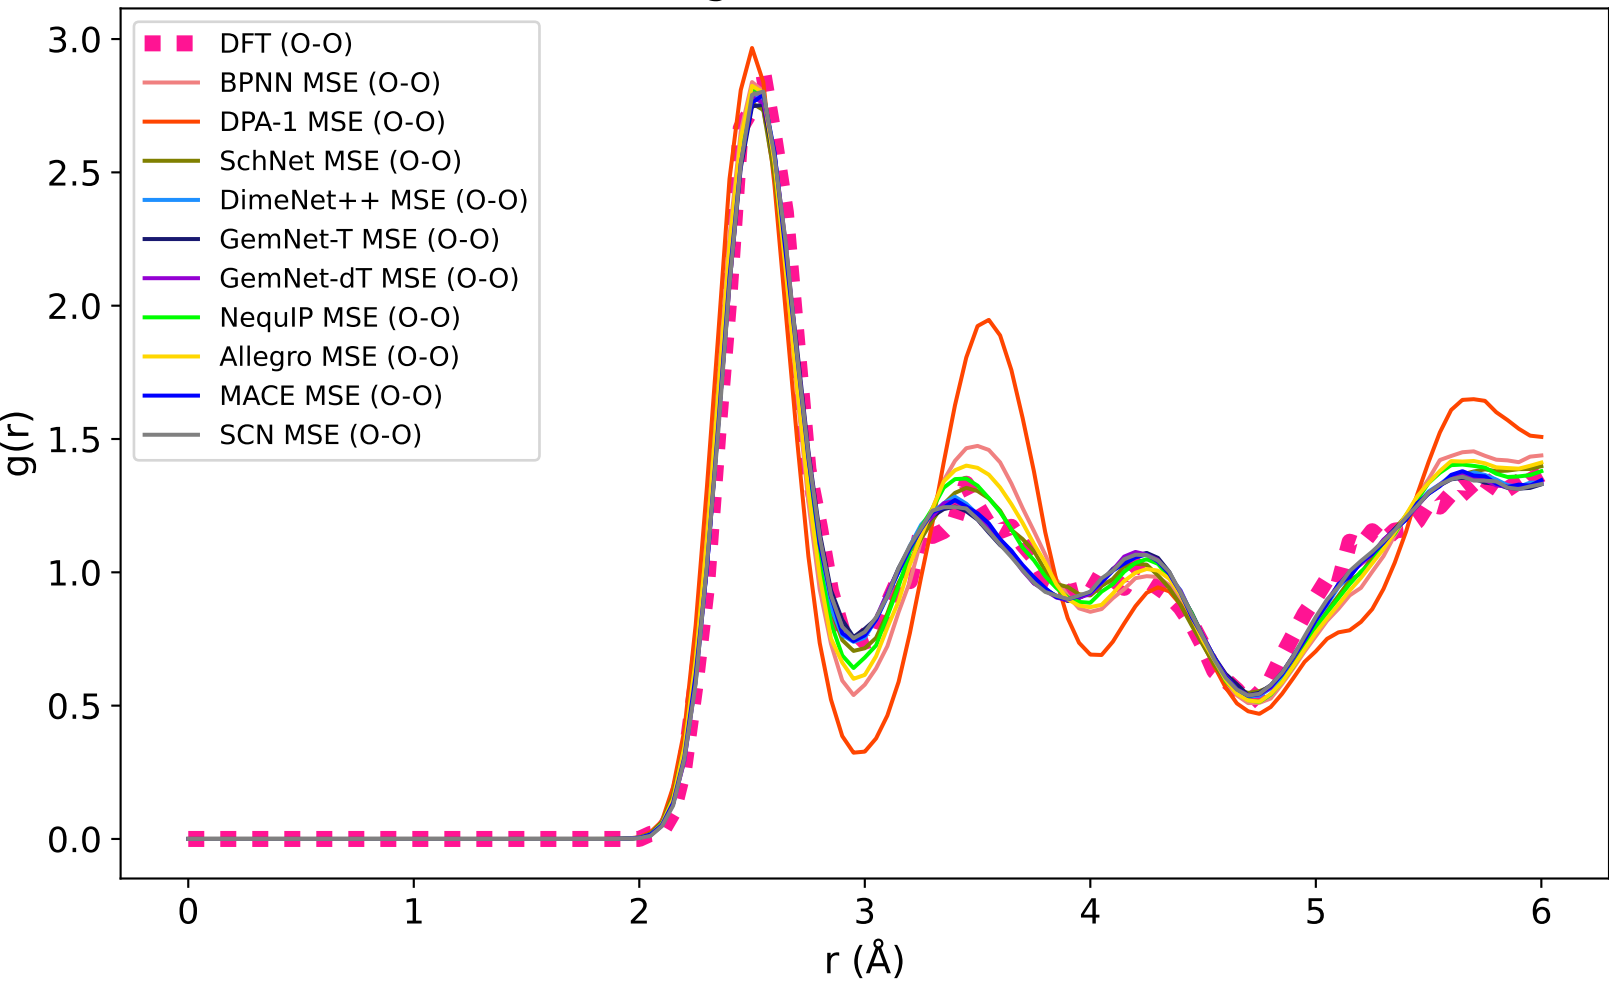

Supplement: supplementary_material [file attachment]

# P31c, 28 atoms

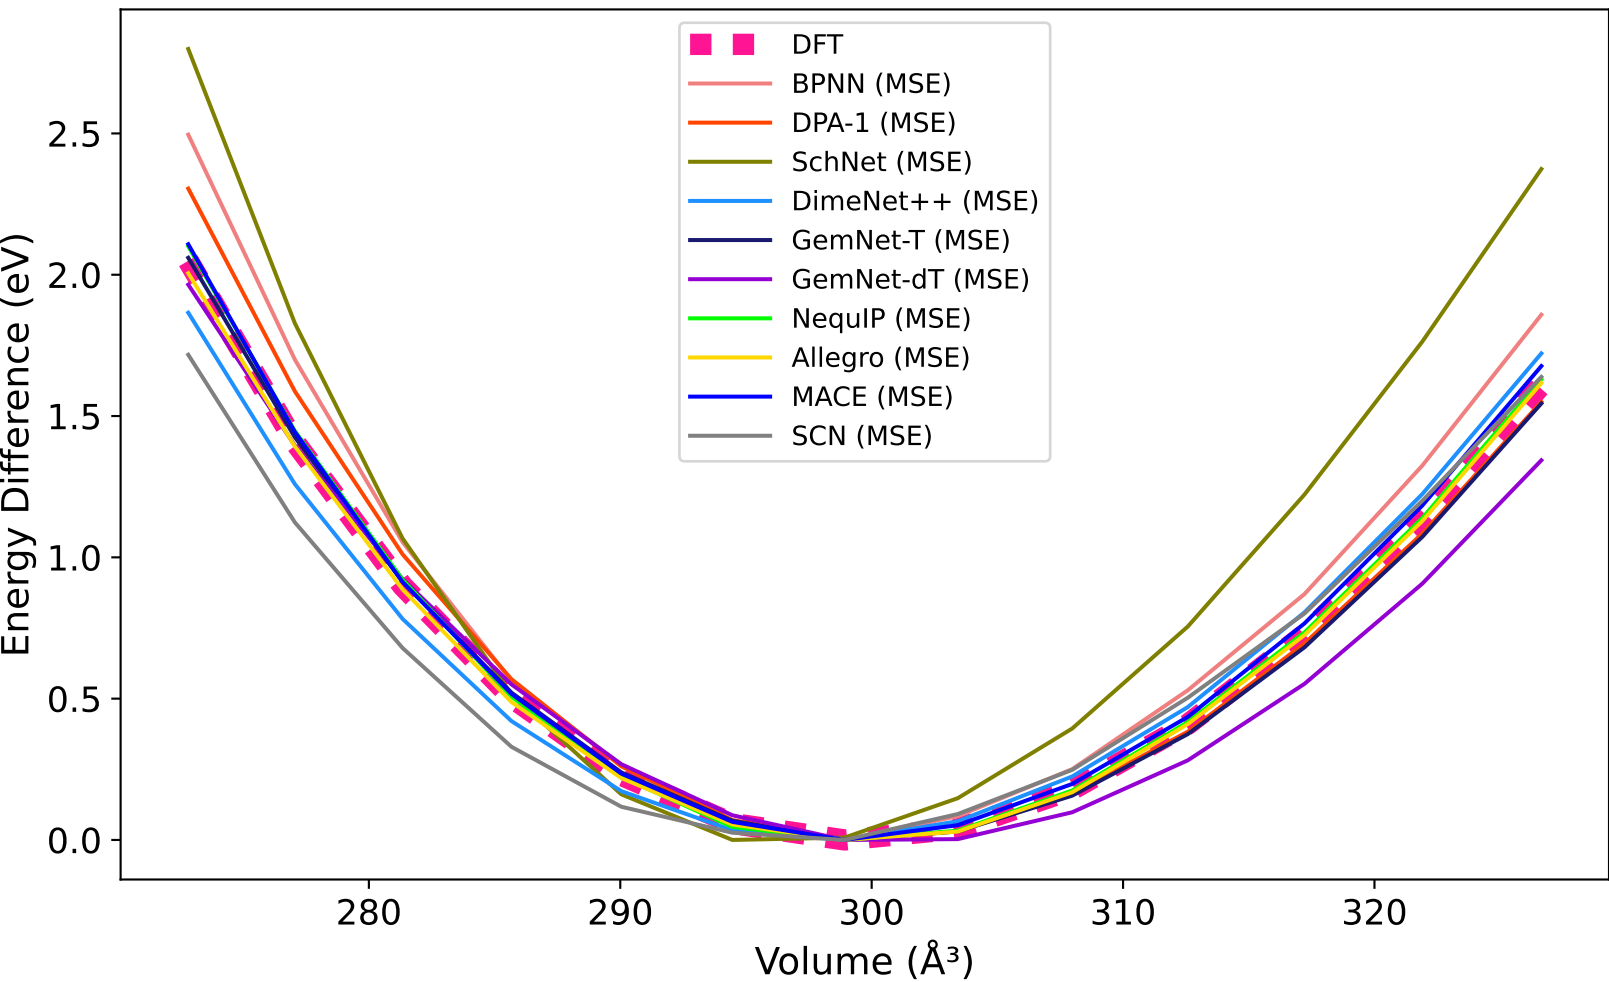

Supplement: supplementary_material [file attachment]

Tetragonal, 1200K, (Hf-Hf)

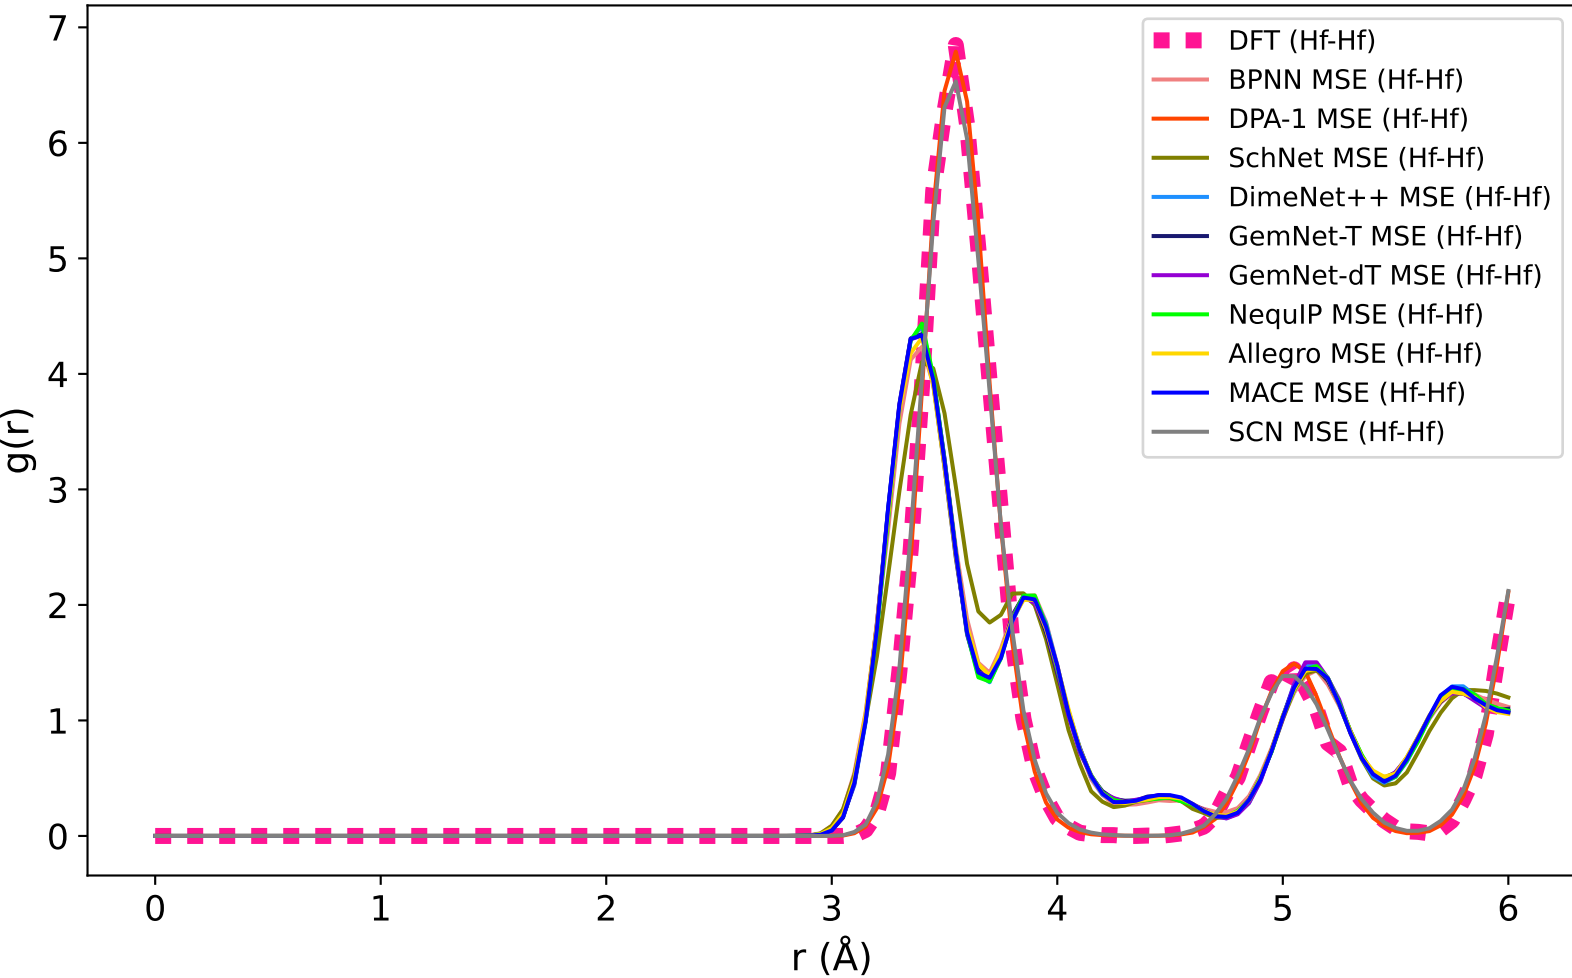

Supplement: supplementary_material [file attachment]

Cubic (2), 1200K, (Hf-O)

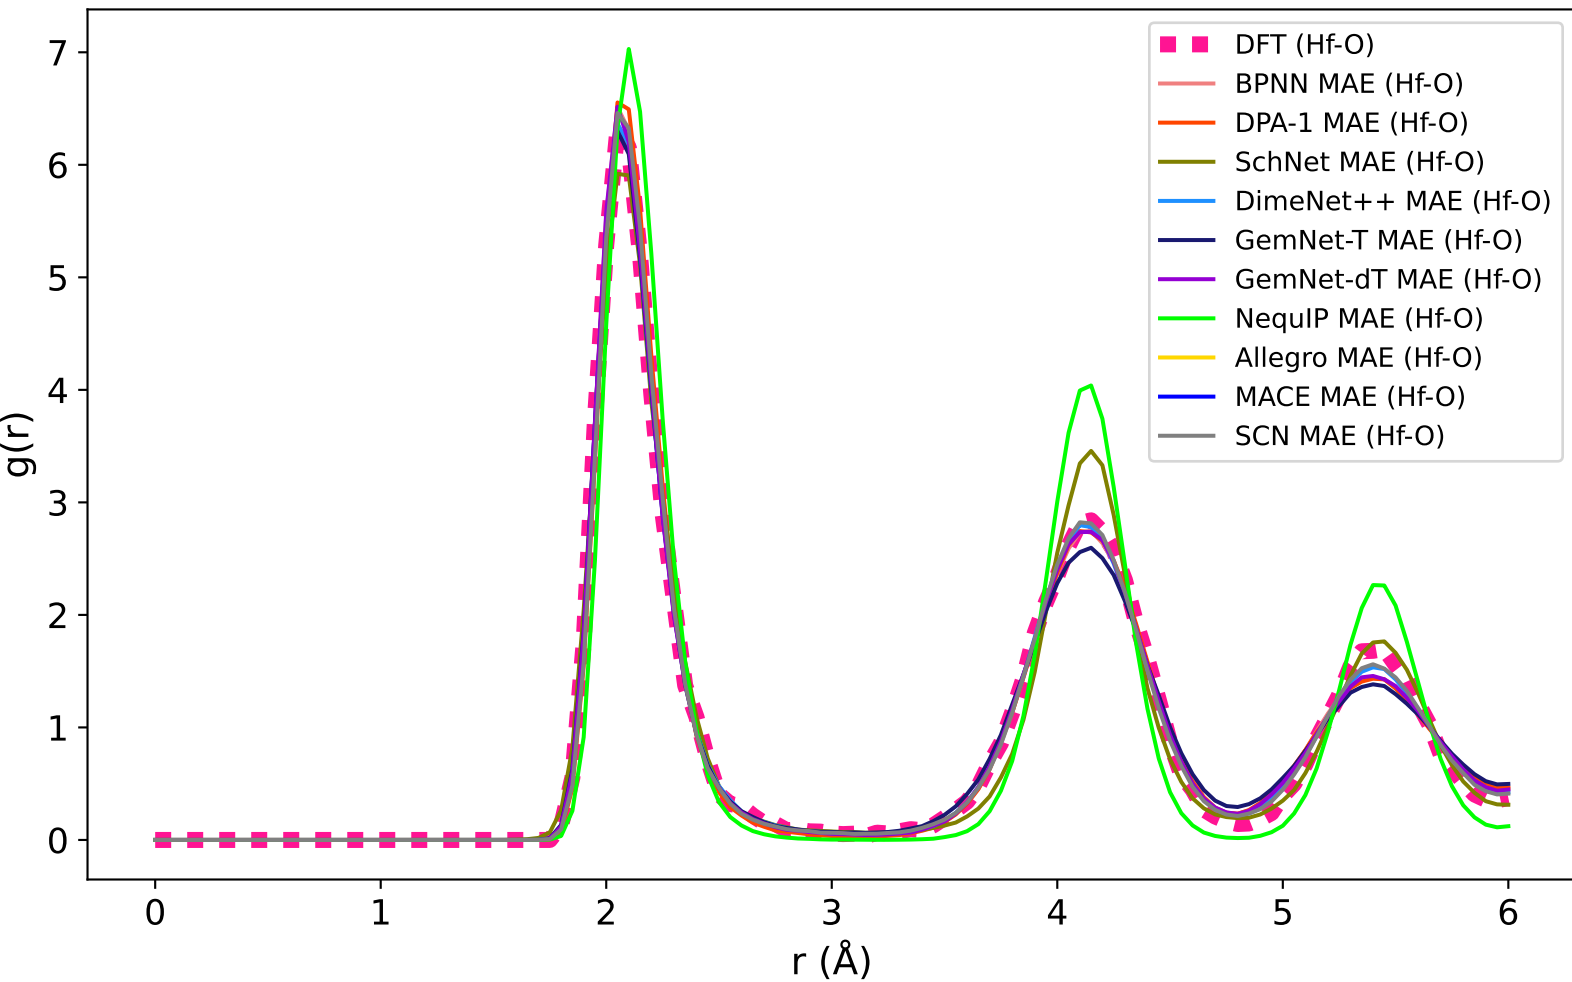

Supplement: supplementary_material [file attachment]

## Orthorhombic (1), 1200K, (Hf-Hf)

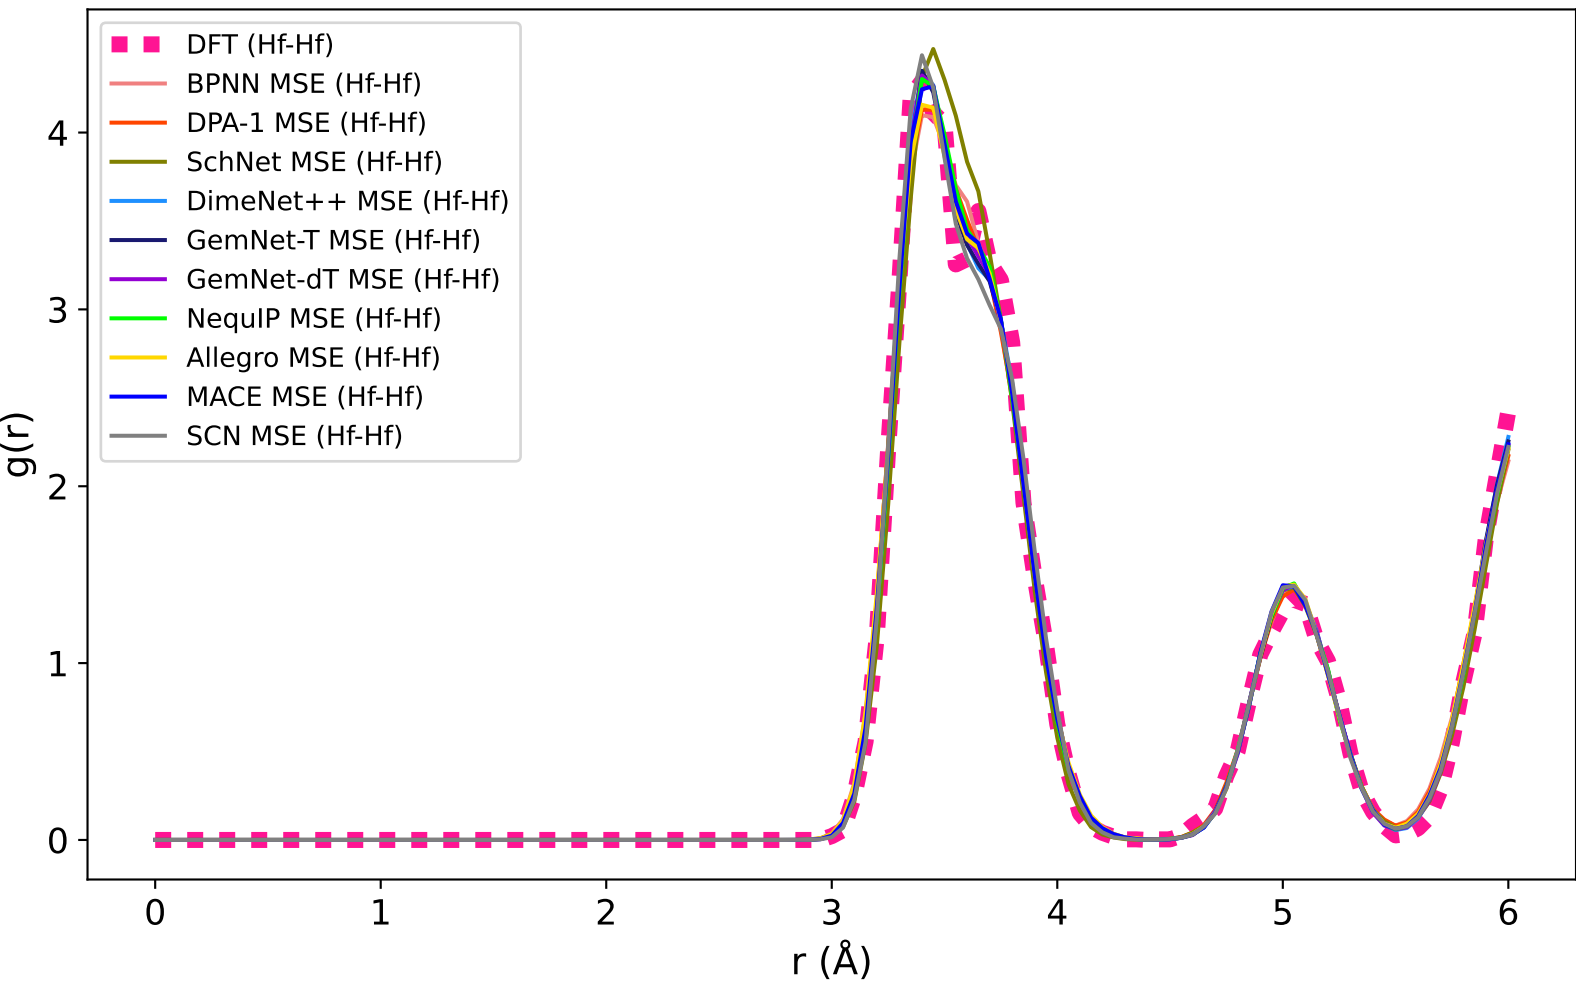

Supplement: supplementary_material [file attachment]

Triclinic, 1200K, (N-N)

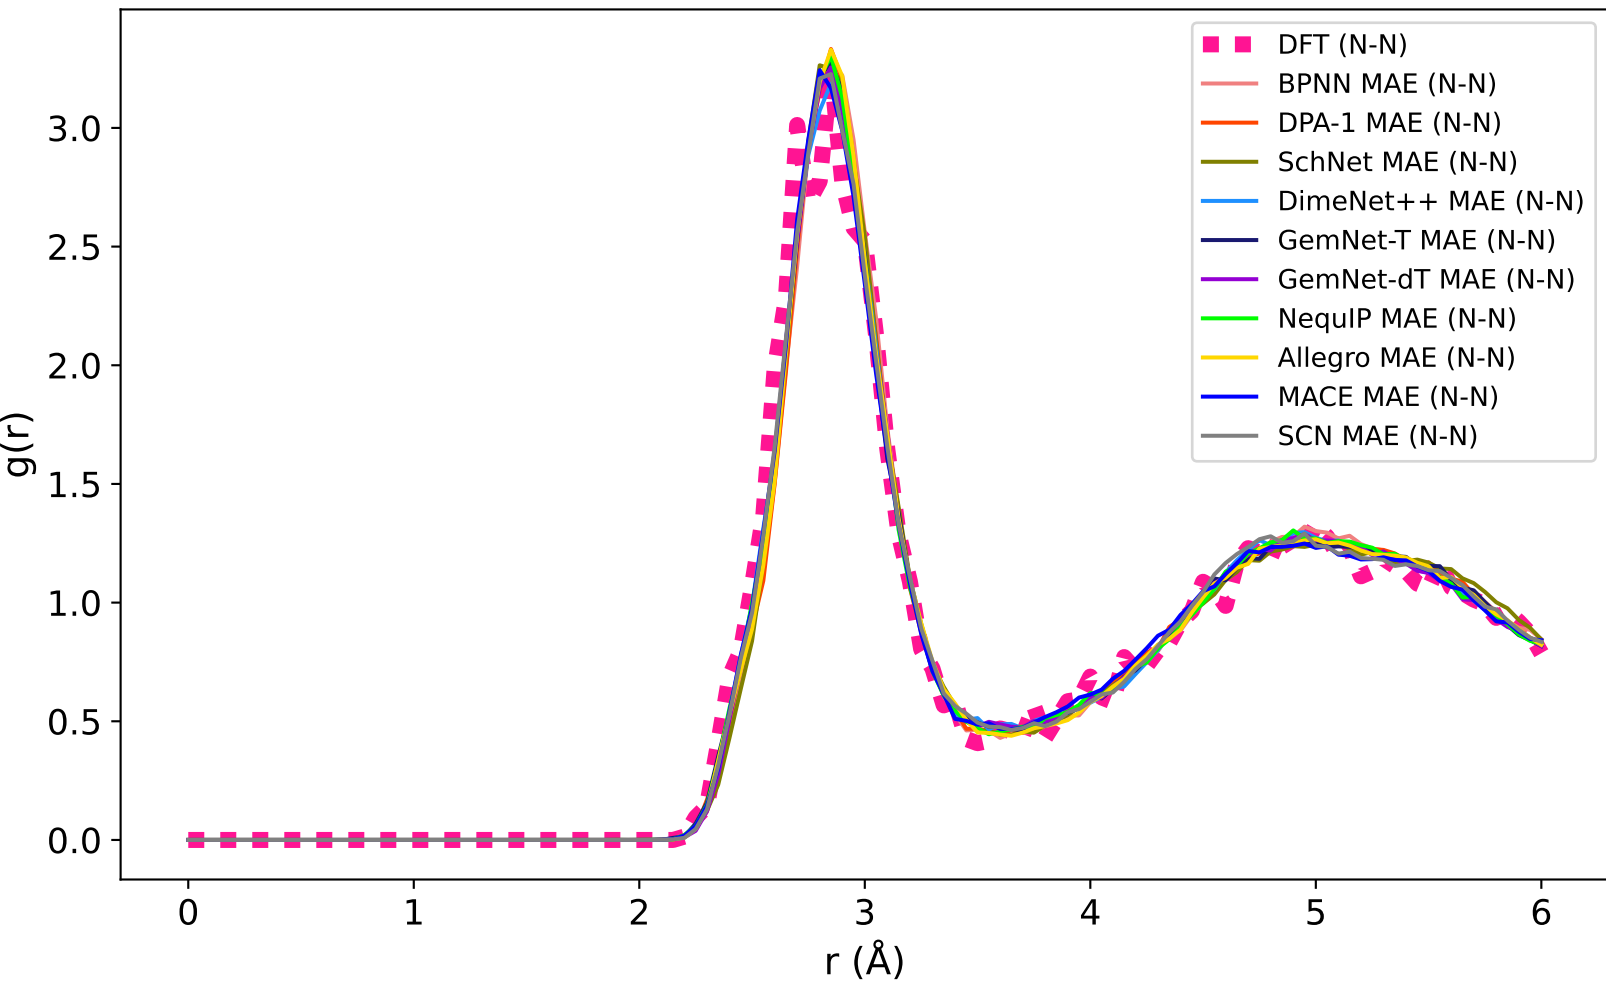

Supplement: supplementary_material [file attachment]

Hexagonal (2), 1200K, (Hf-O)

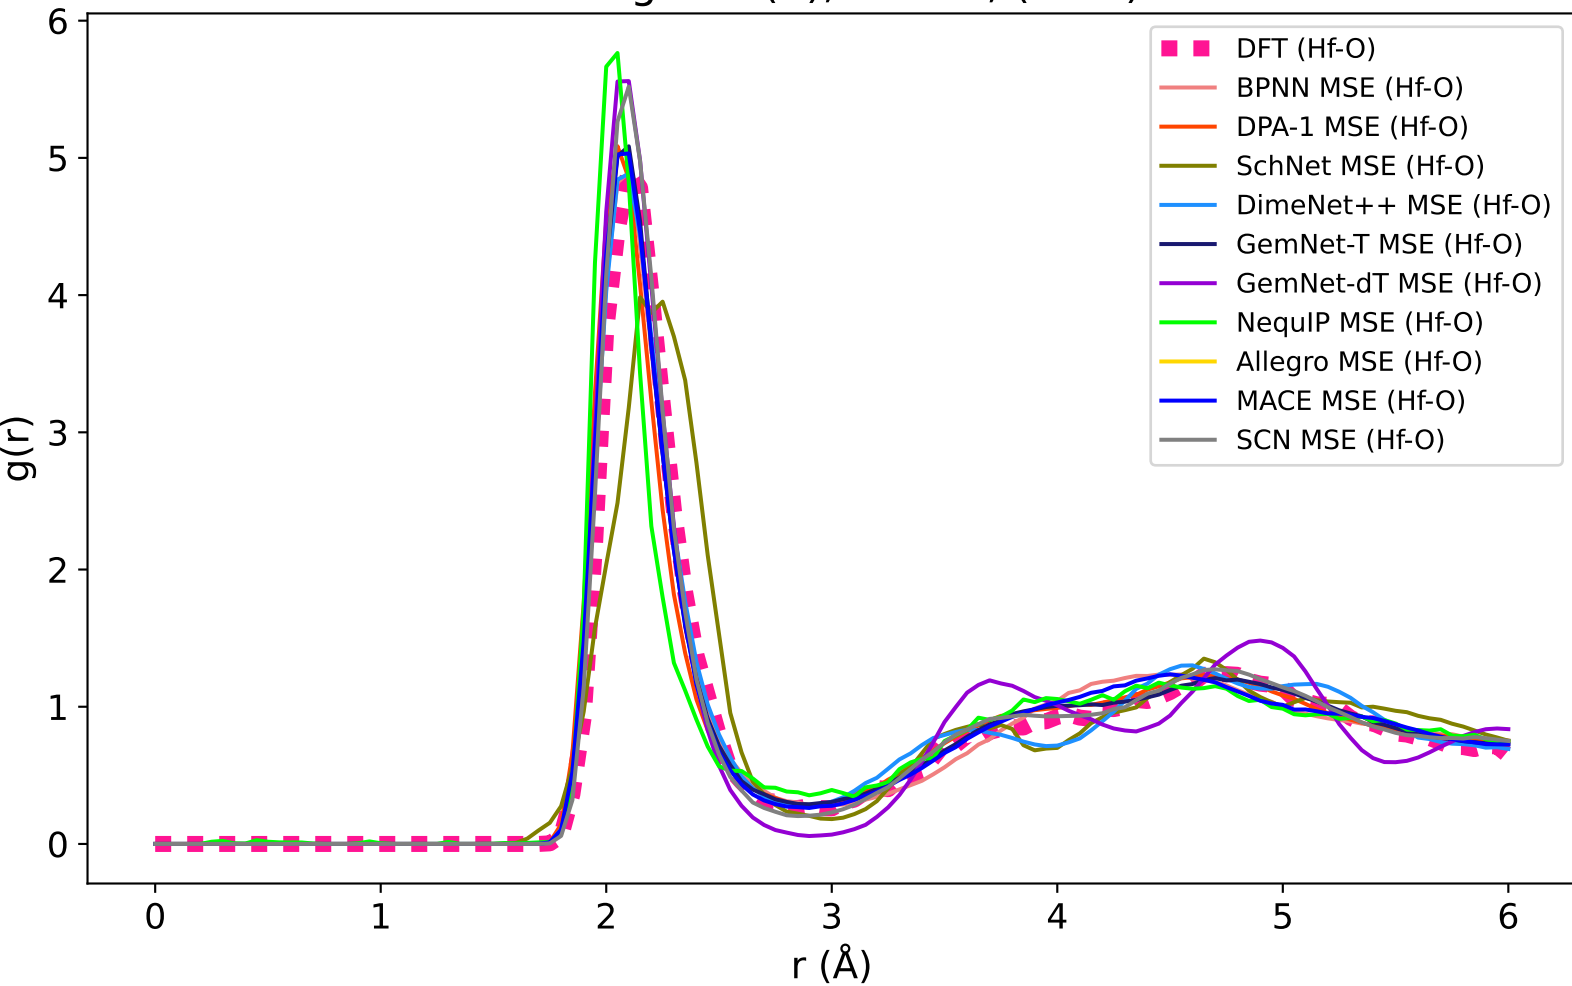

Supplement: supplementary_material [file attachment]

Cubic (2), 1200K, (O-O)

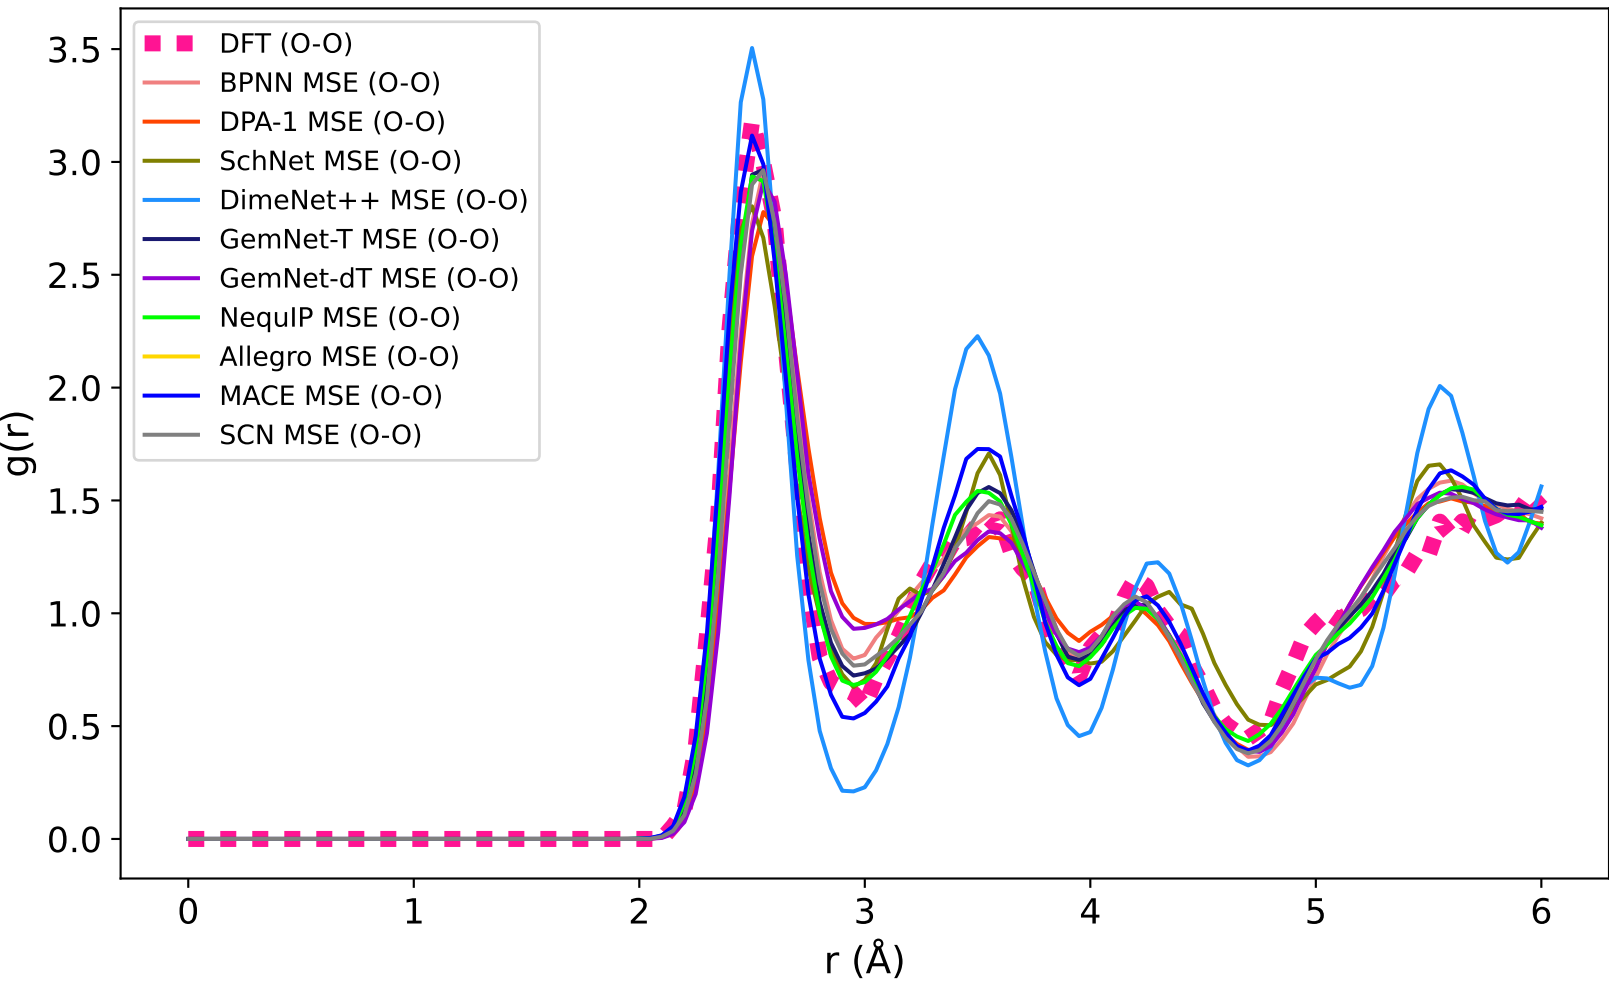

Supplement: supplementary_material [file attachment]

Orthorhombic (1), 1800K, (Hf-O)

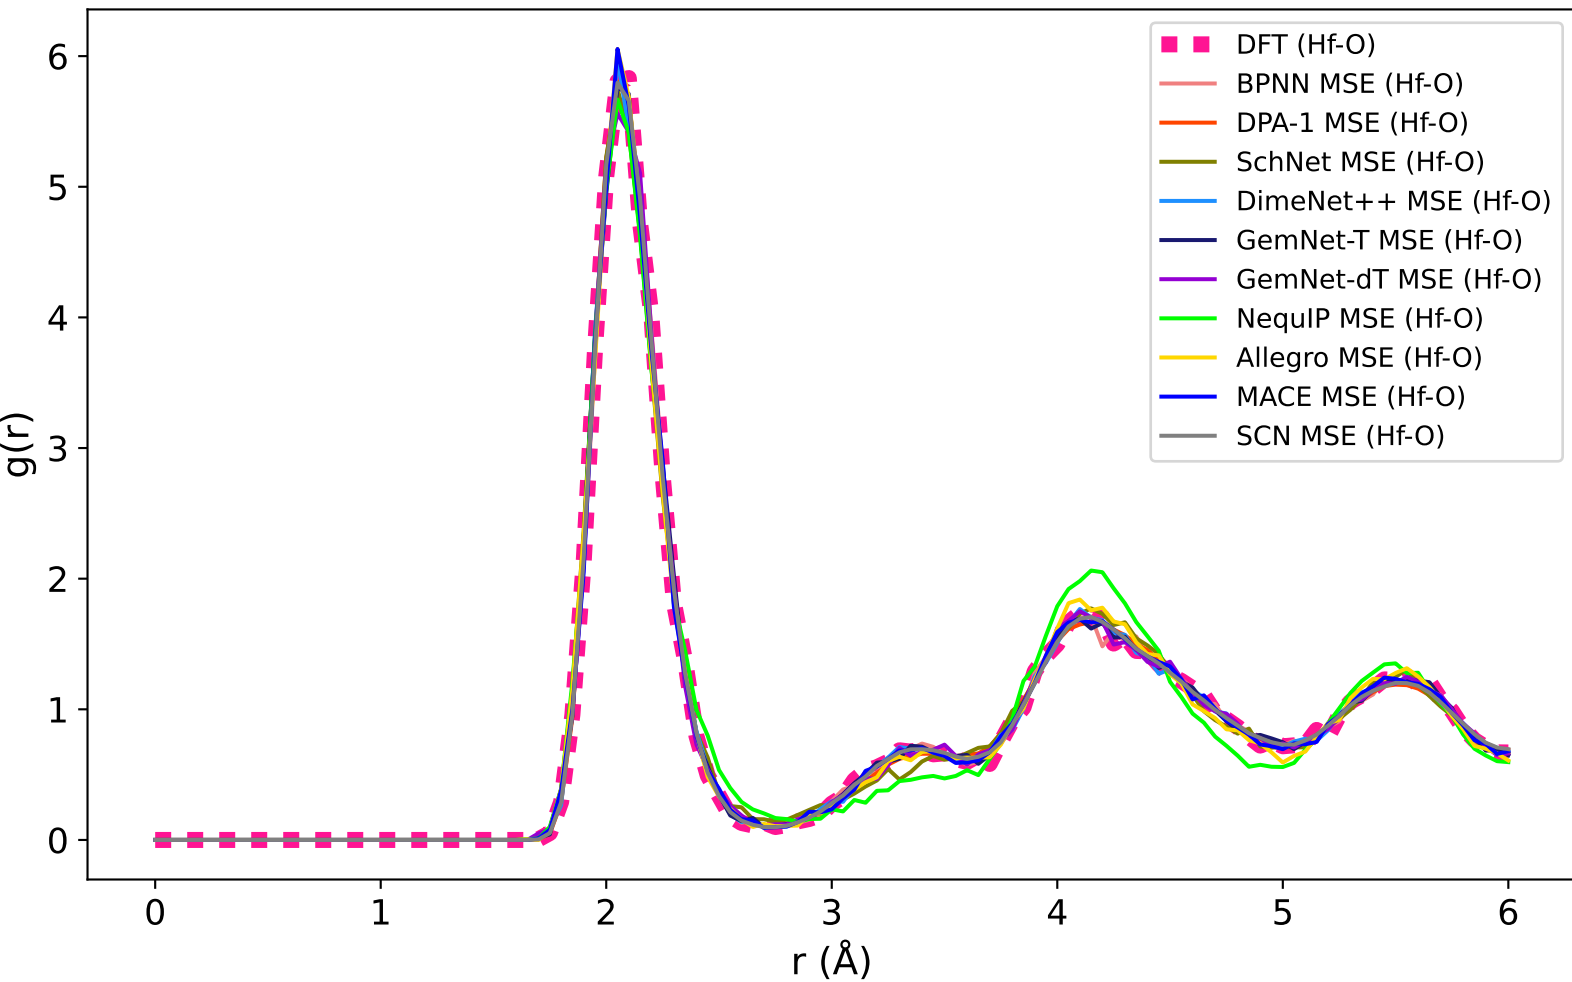

Supplement: supplementary_material [file attachment]

# Monoclinic, 1200K, (Hf-Hf)

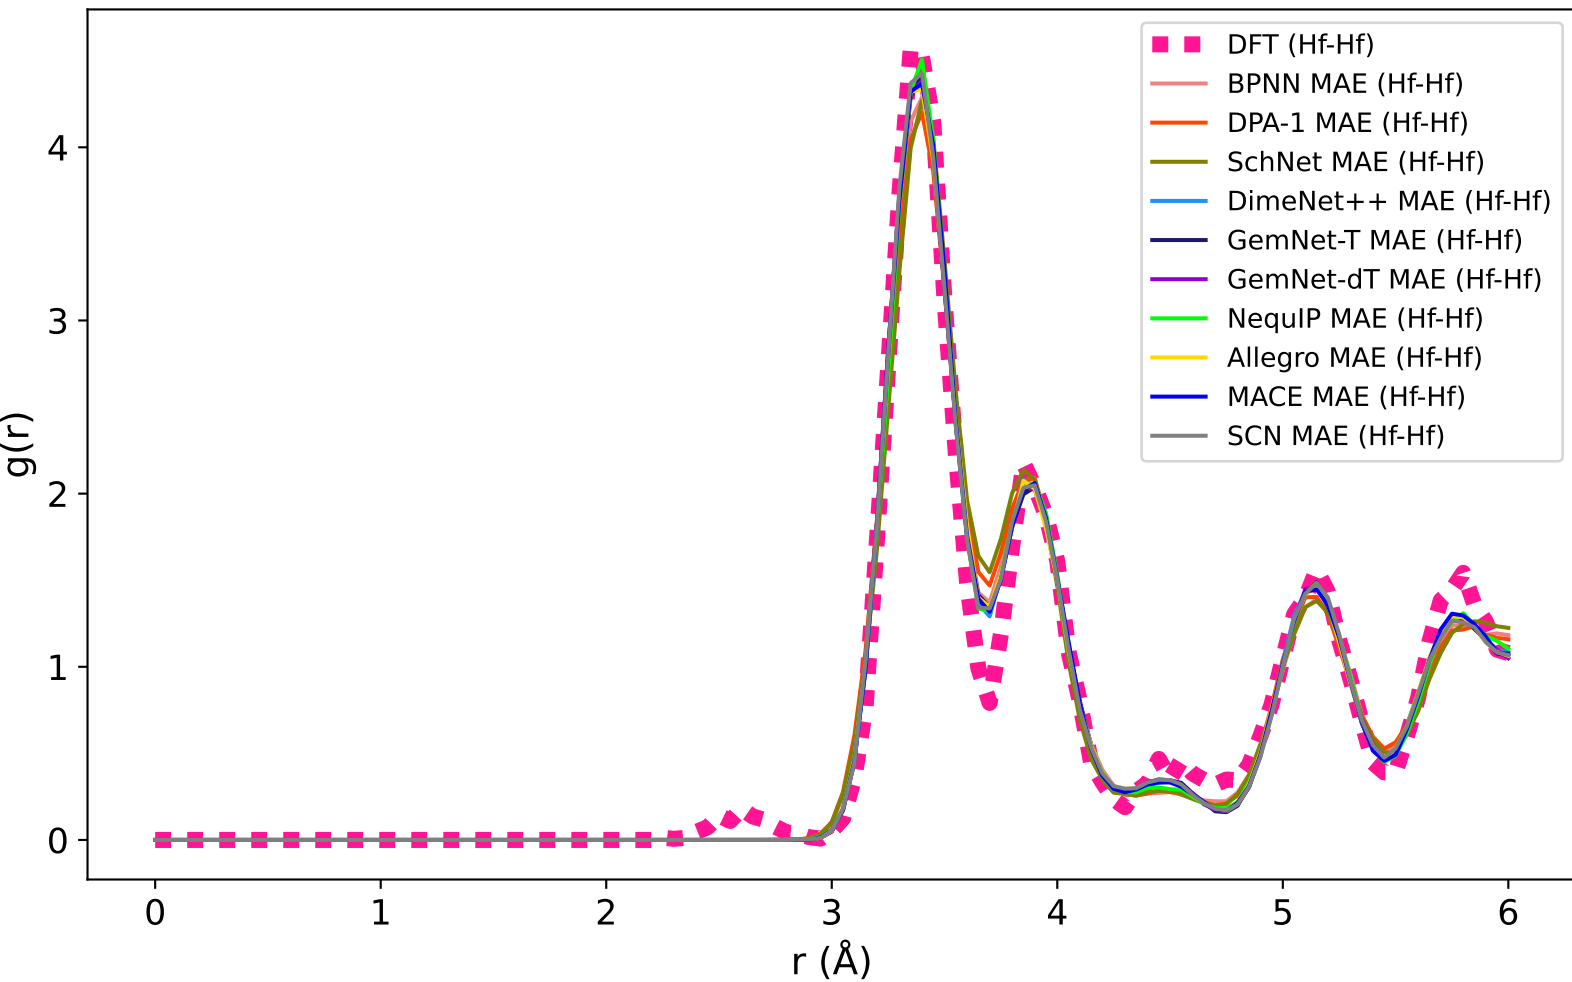

Supplement: supplementary_material [file attachment]

Cubic (1), 1200K, (N-N)

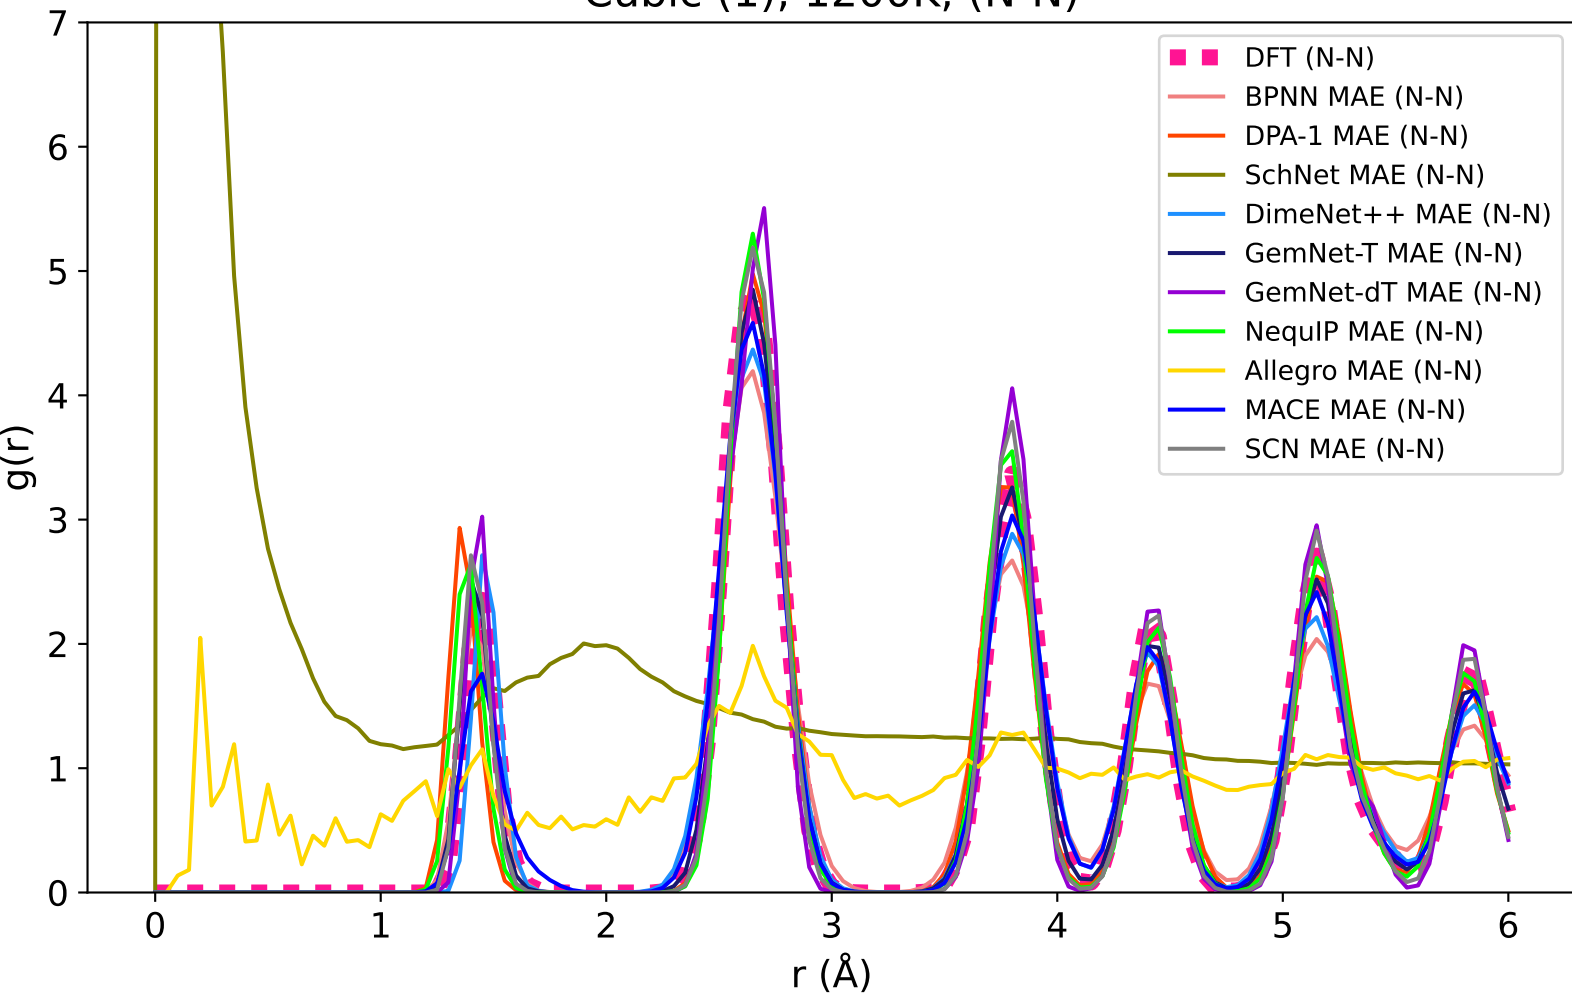

Supplement: supplementary_material [file attachment]

Cubic (2), 1200K, (Si-Si)

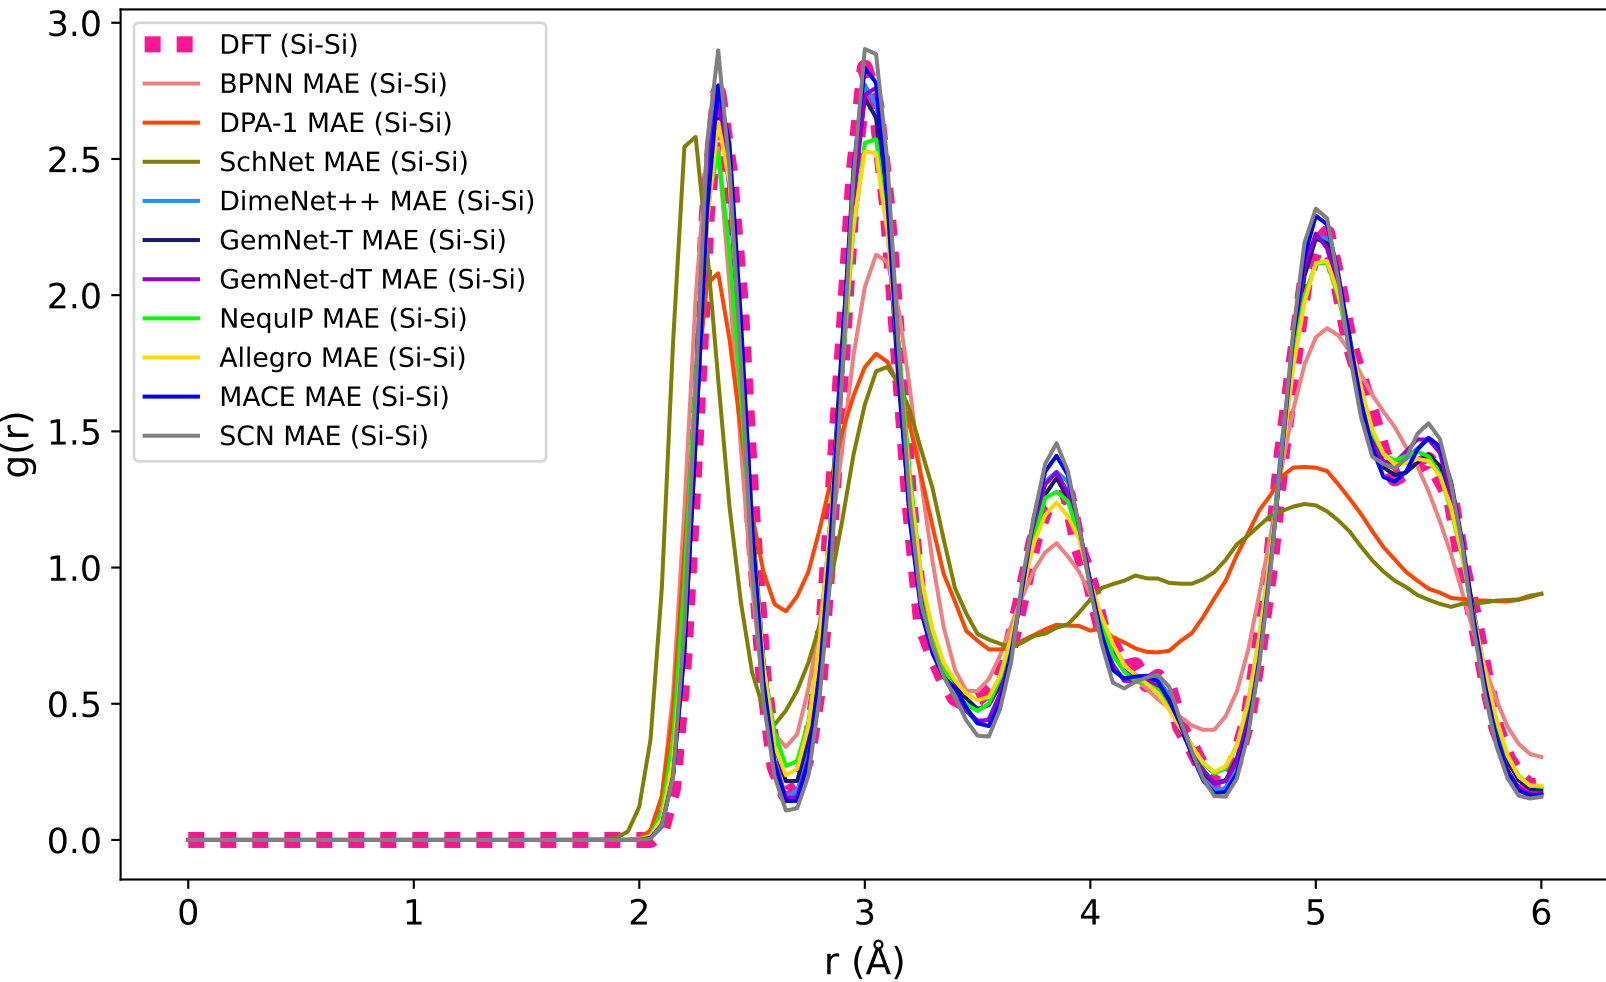

Supplement: supplementary_material [file attachment]

Orthorhombic (2), 1200K, (O-O)

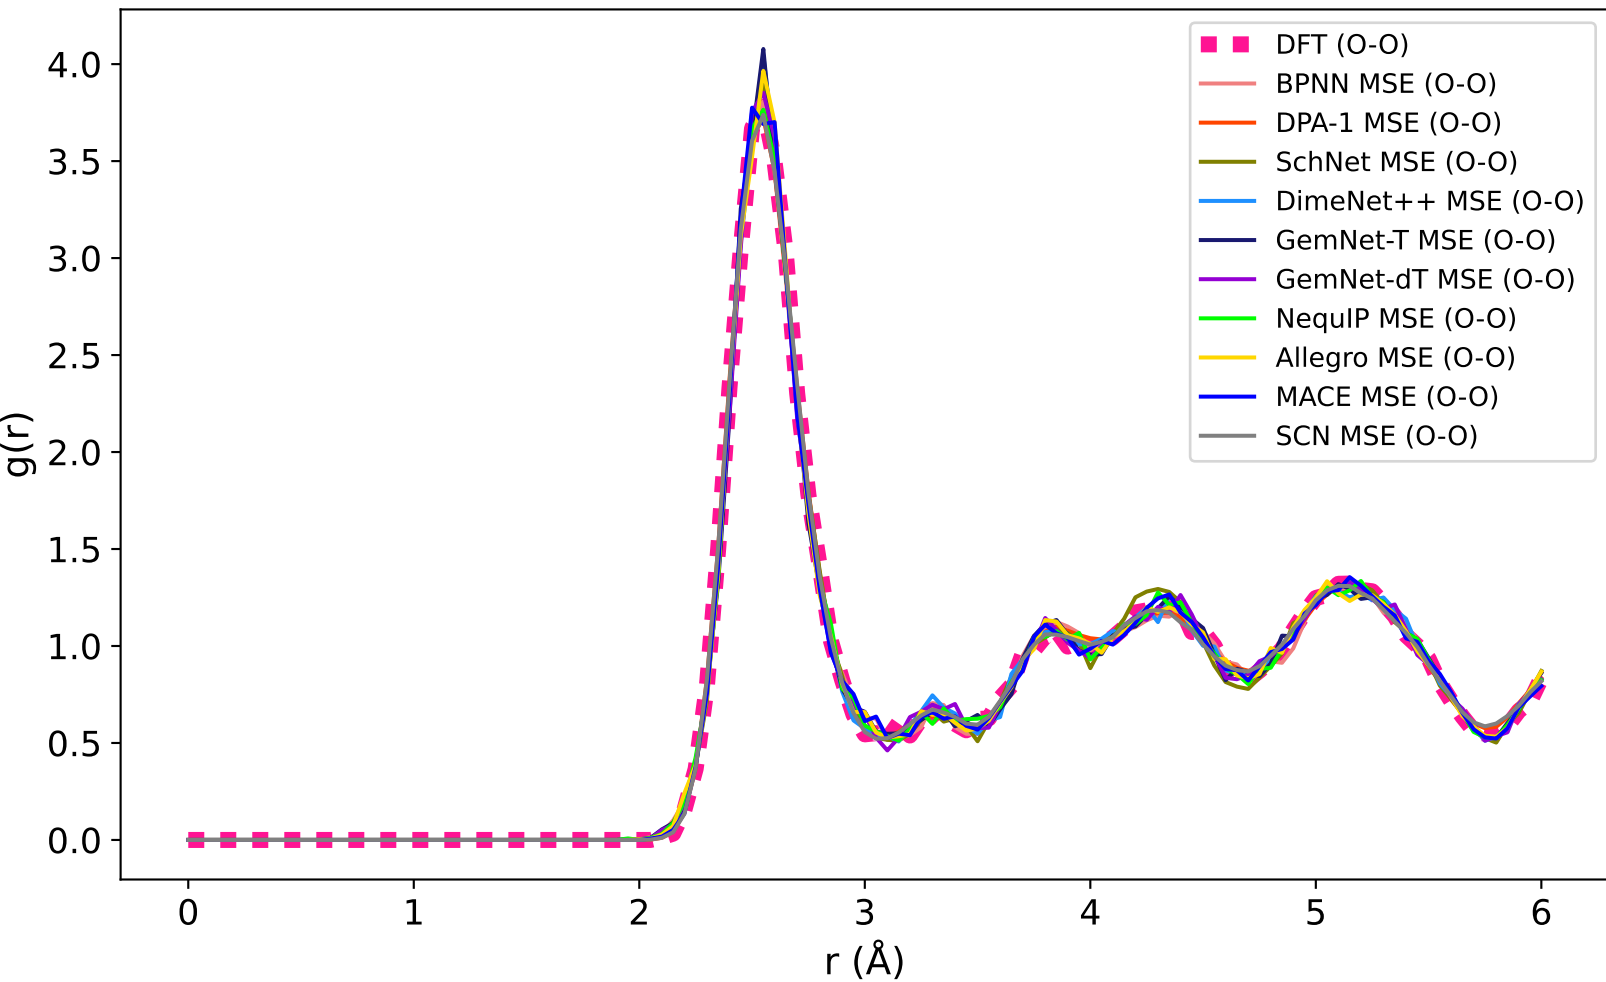

Supplement: supplementary_material [file attachment]

Orthorhombic (2), 1800K, (Hf-Hf)

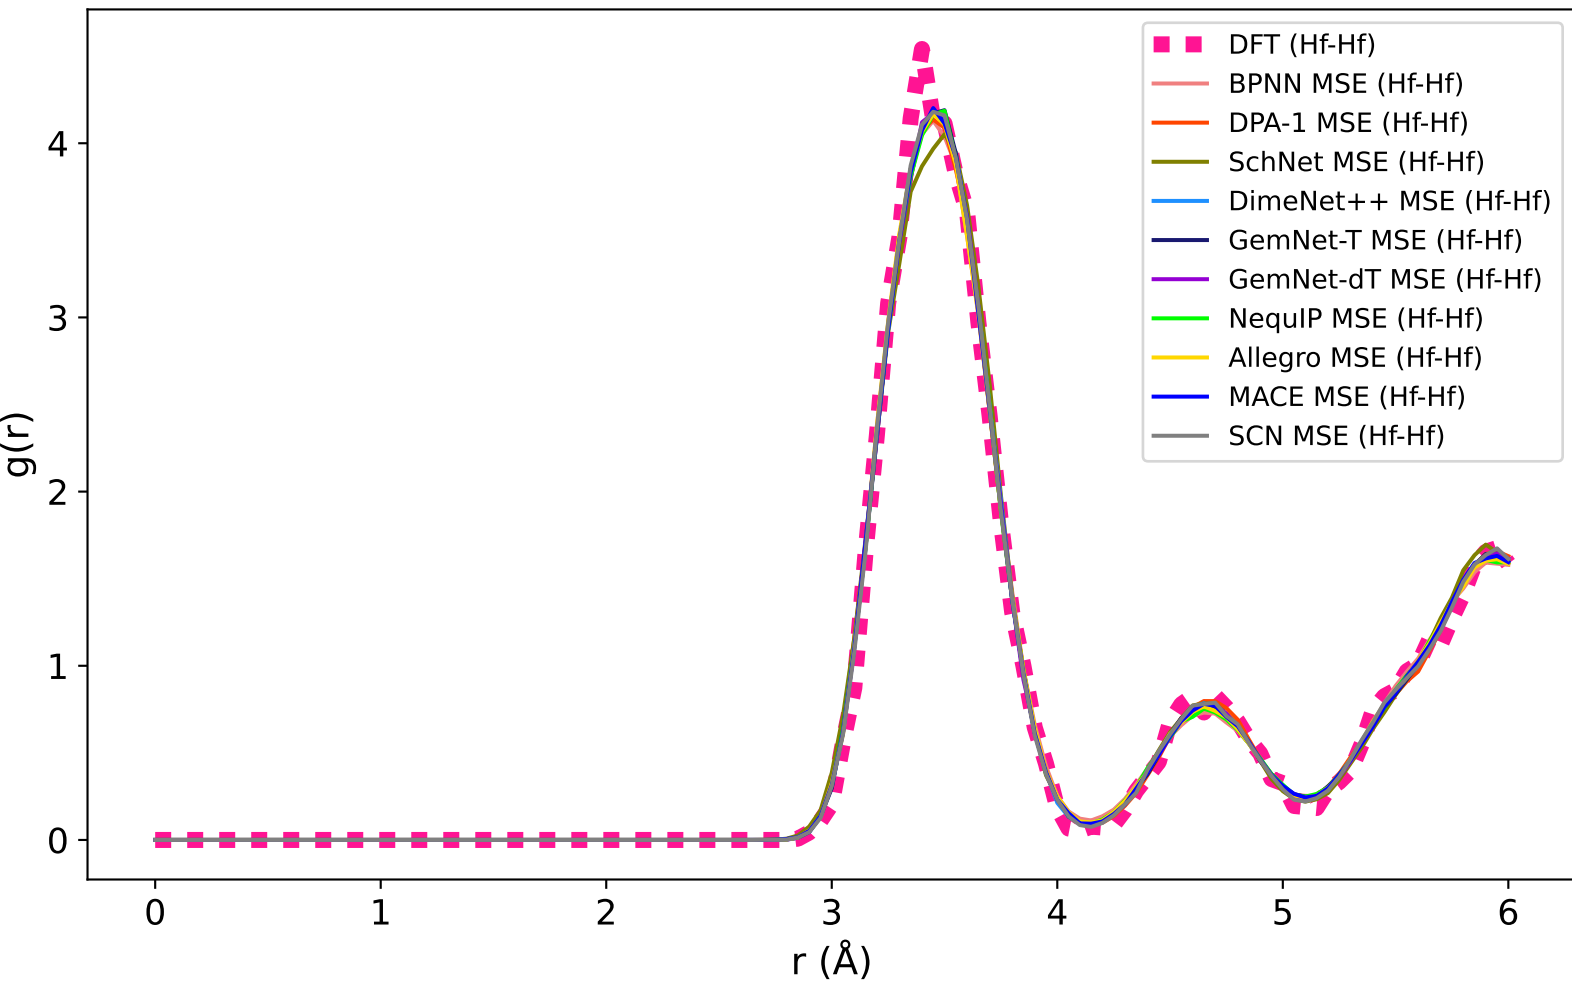

Supplement: supplementary_material [file attachment]

Cubic (1), 1200K, (N-N)

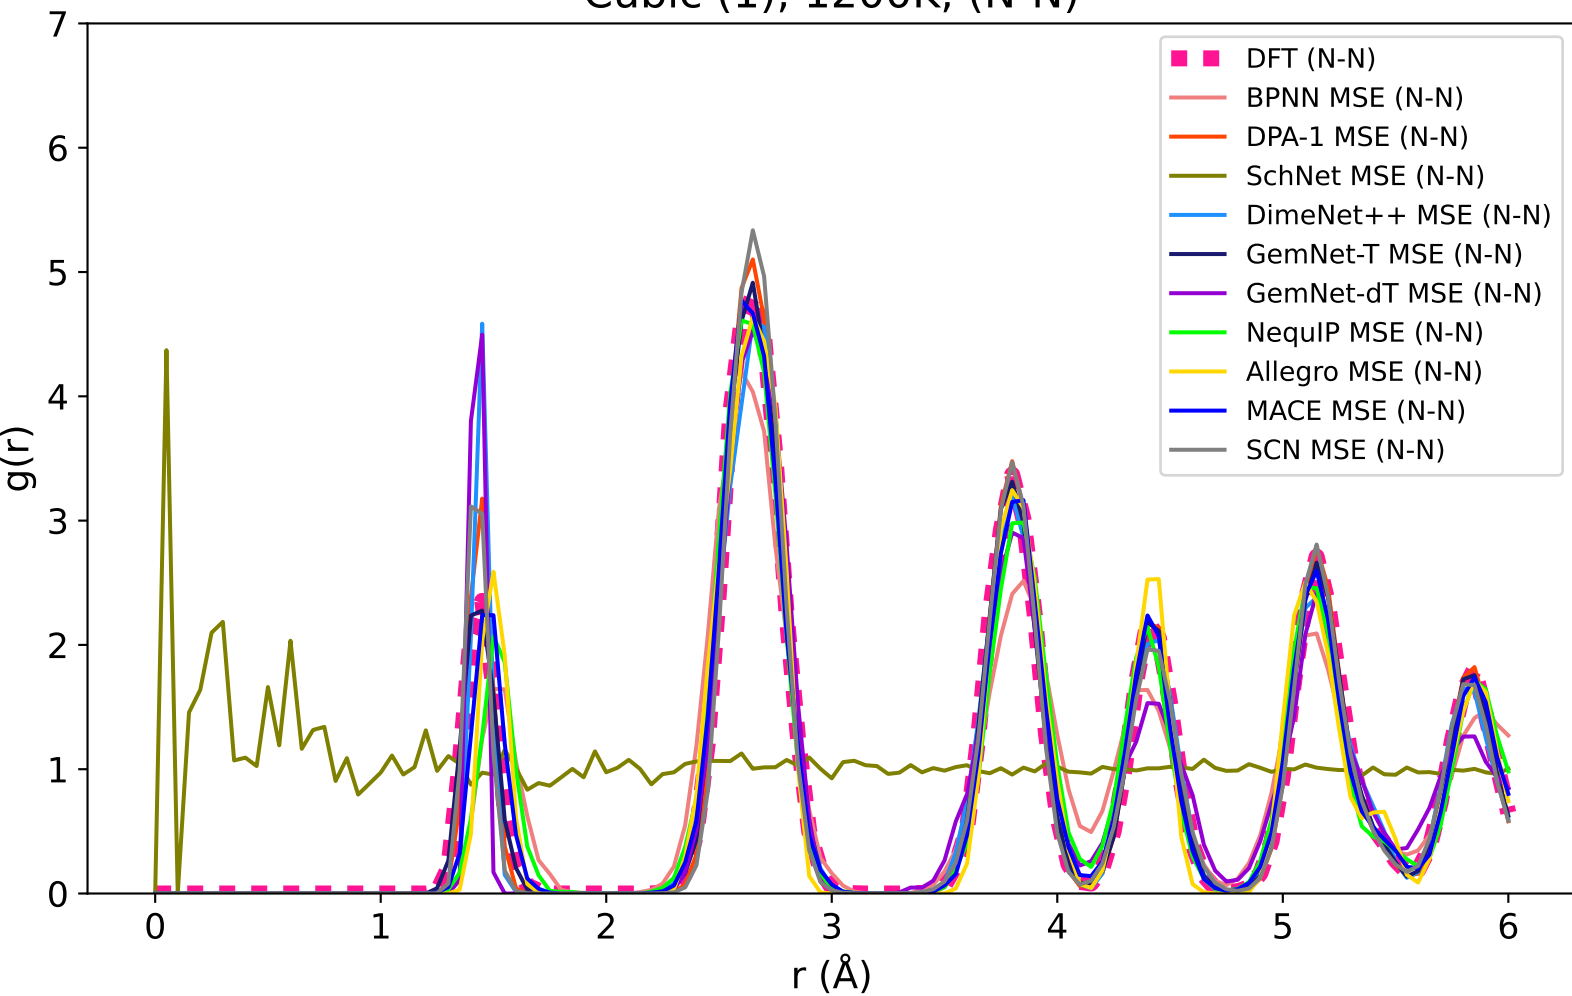

Supplement: supplementary_material [file attachment]

# Orthorhombic (1), 1200K, (O-O)

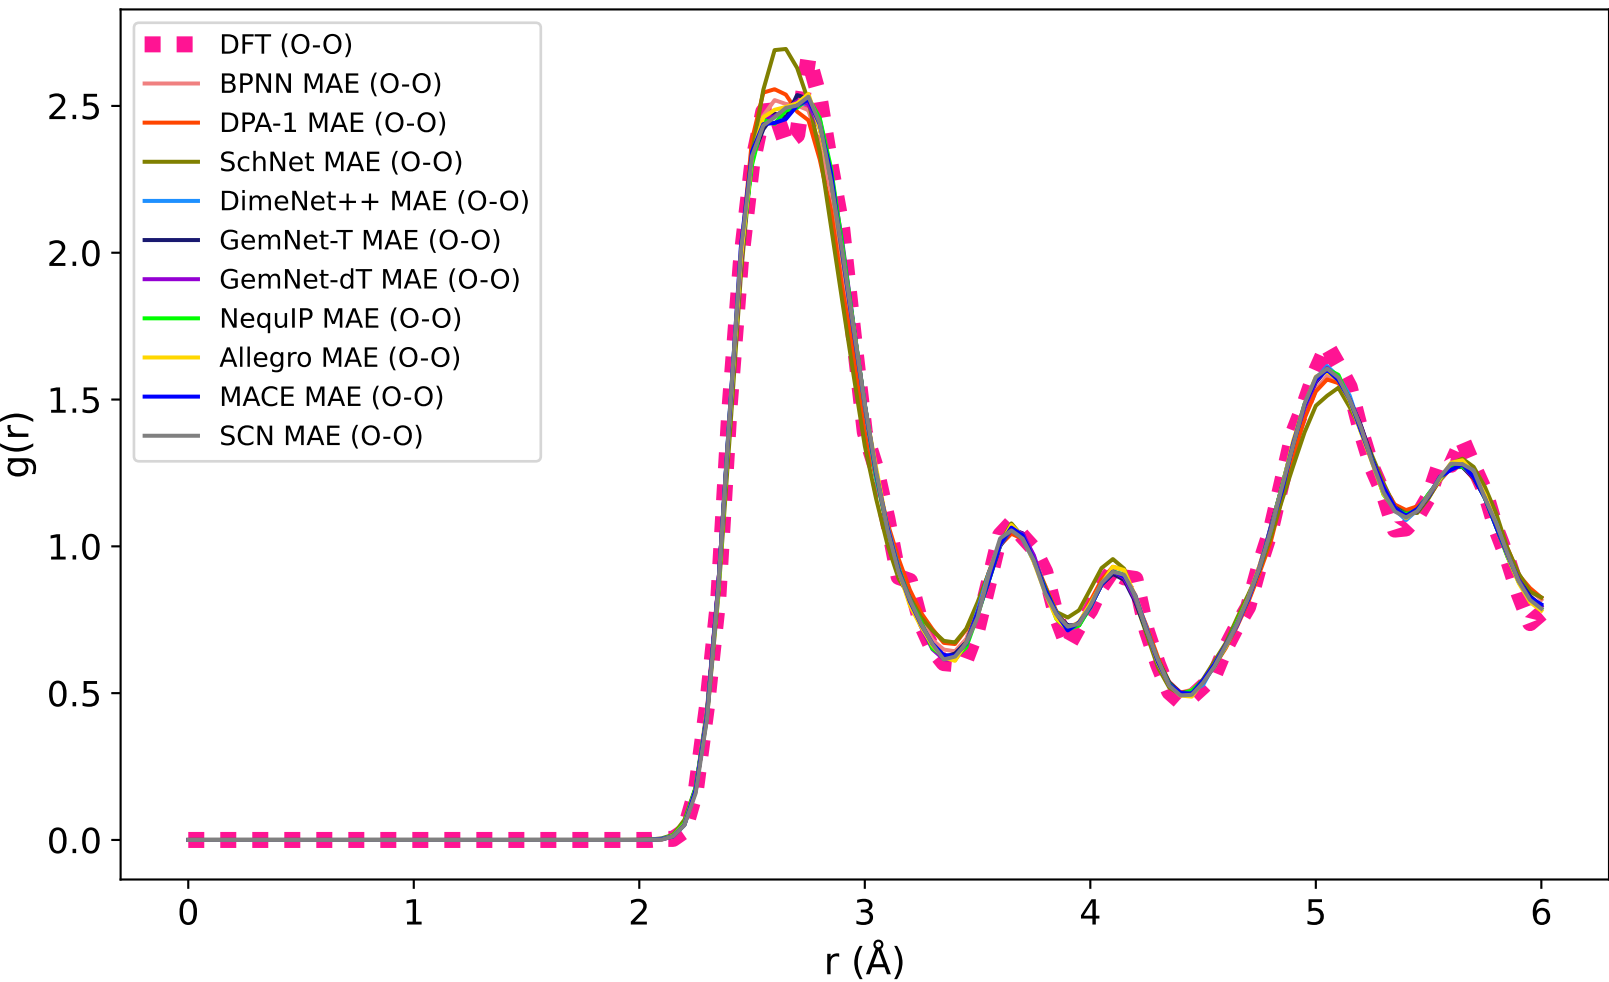

Supplement: supplementary_material [file attachment]

## Hexagonal (2), 1200K, (O-O)

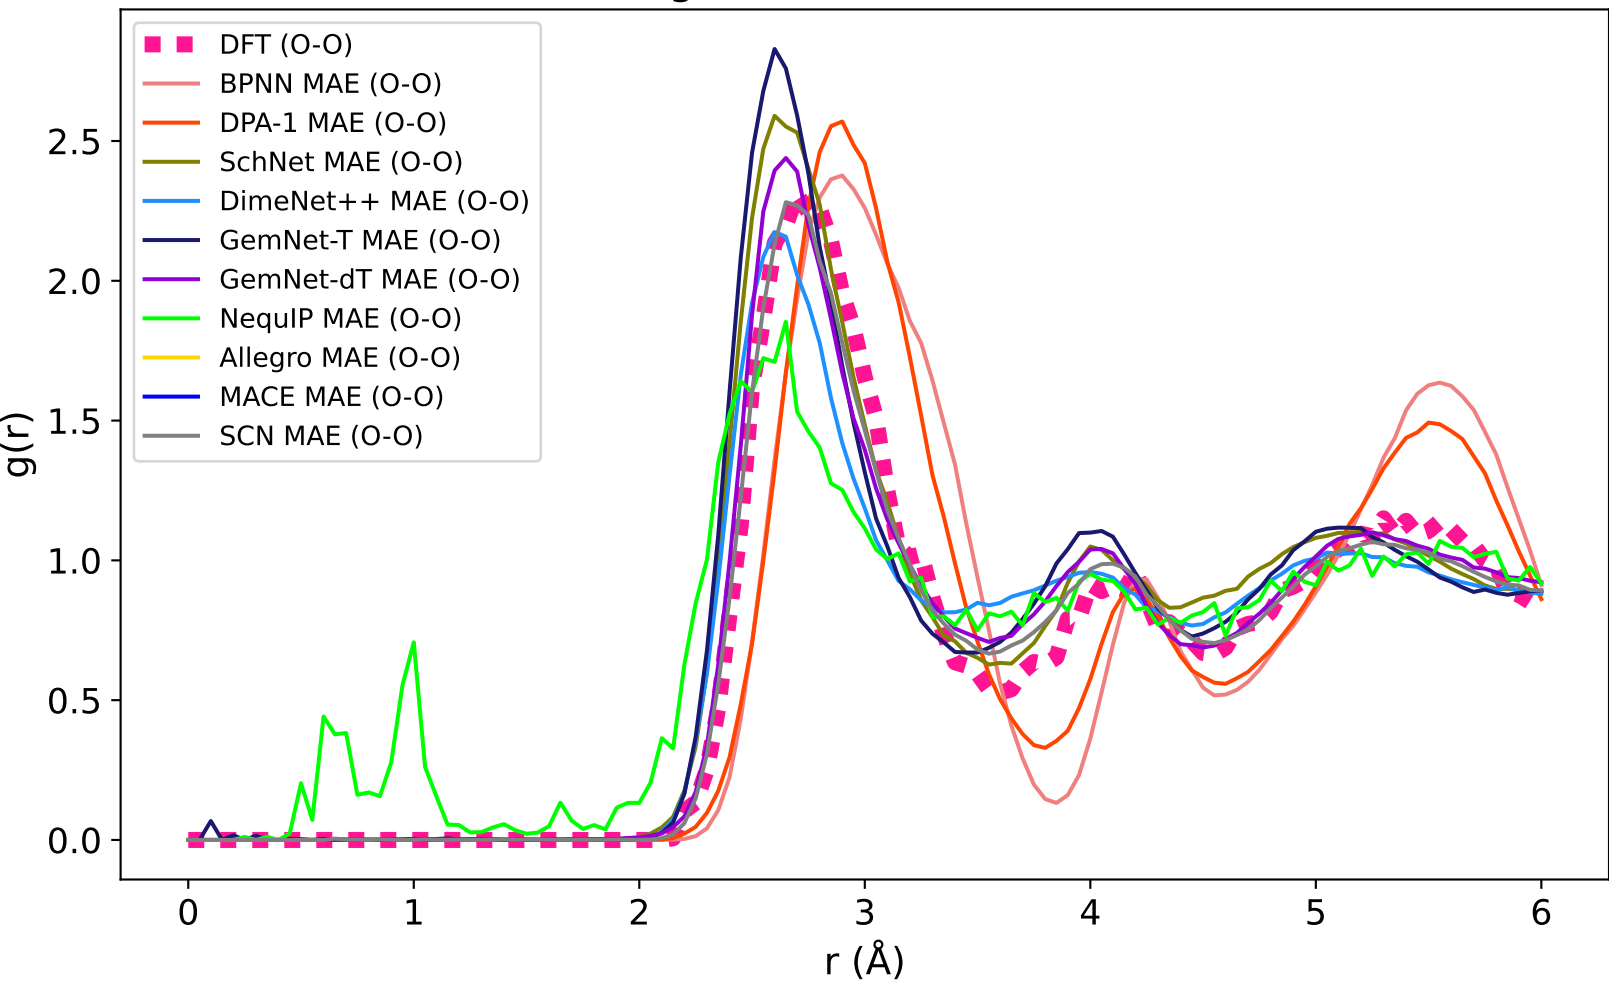

Supplement: supplementary_material [file attachment]

## Orthorhombic (1), 1800K, (O-O)

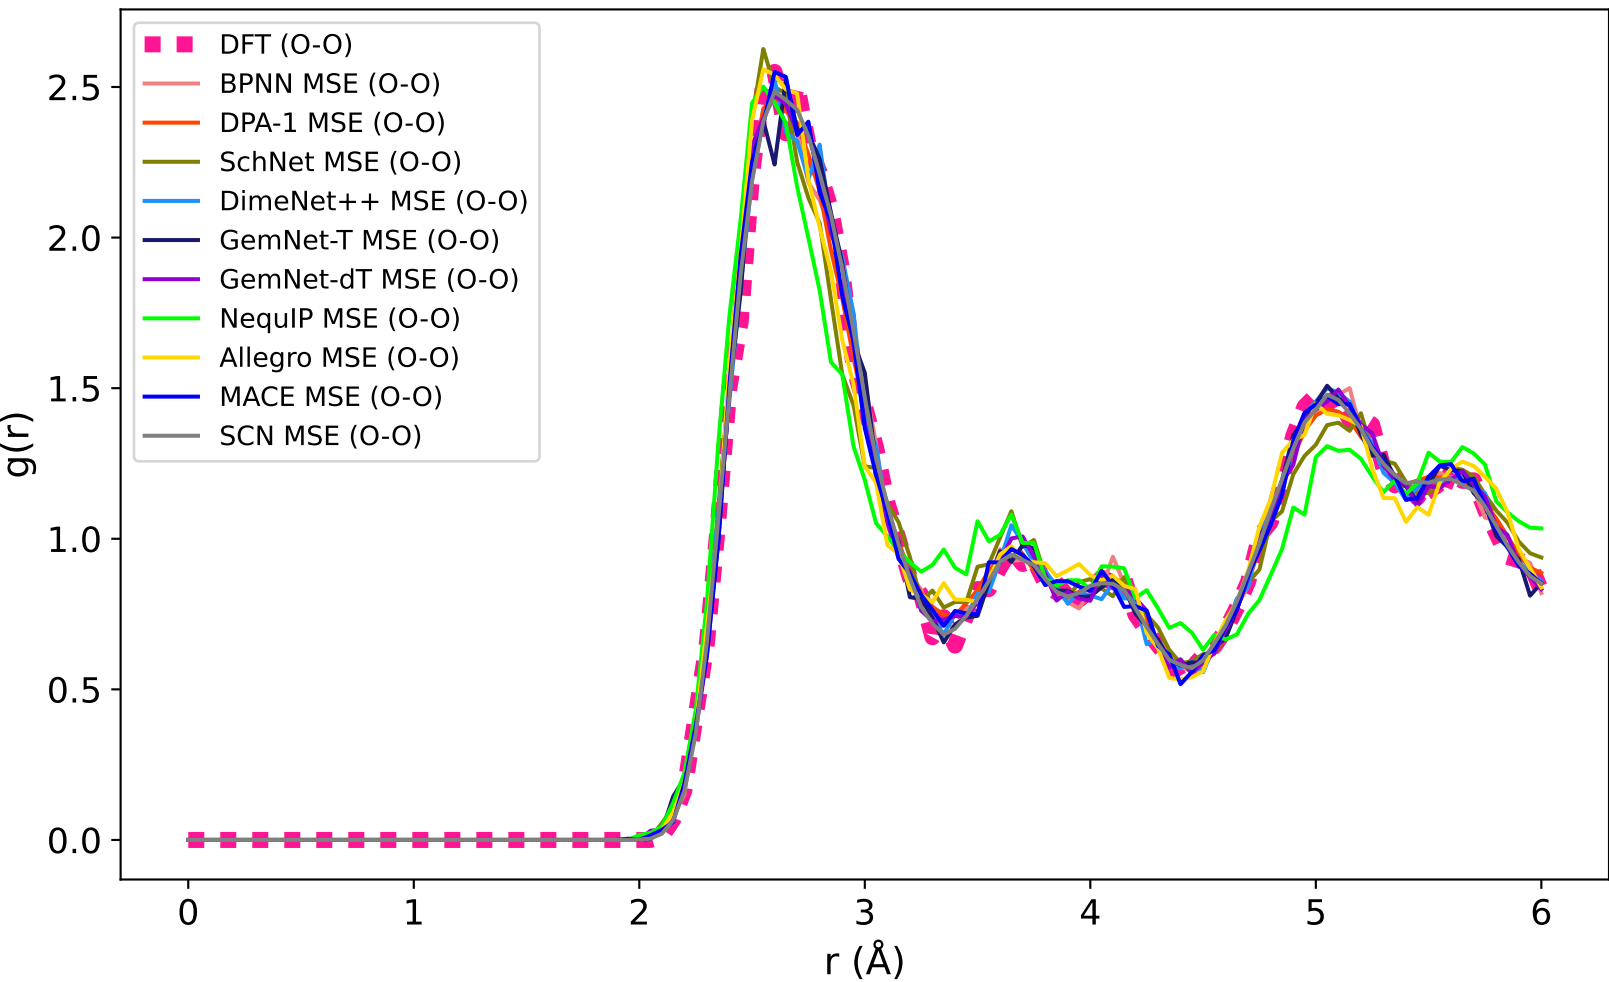

Supplement: supplementary_material [file attachment]

Cubic (1), 1200K, (Si-N)

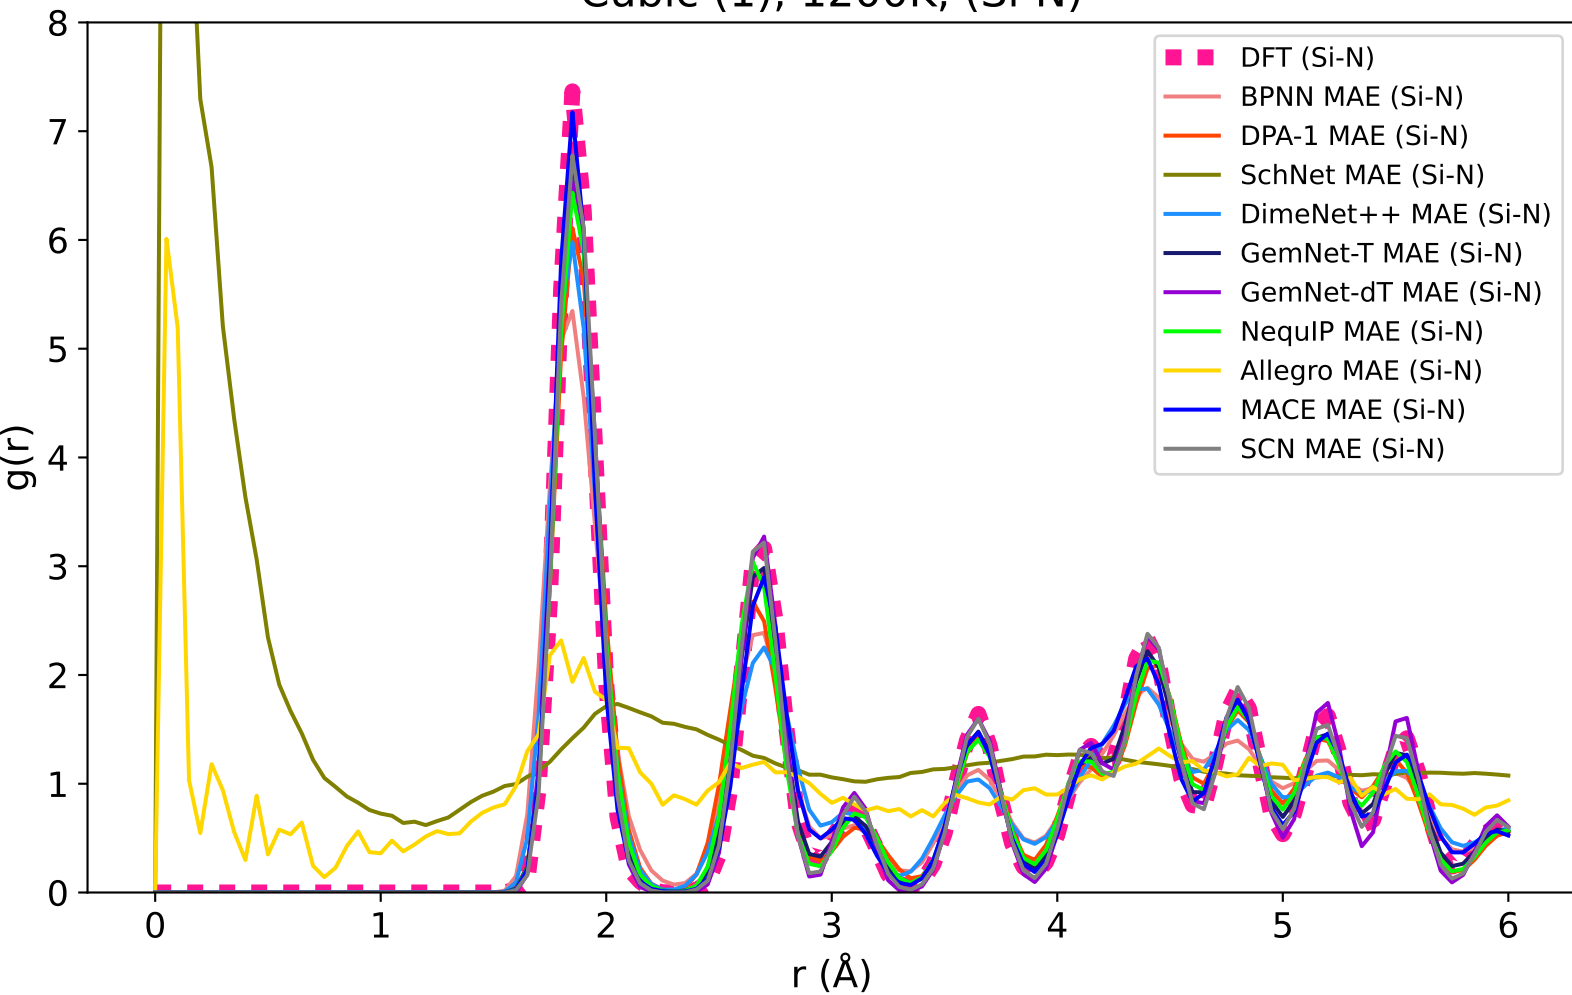

Supplement: supplementary_material [file attachment]

## Hexagonal (2), 1200K, (O-O)

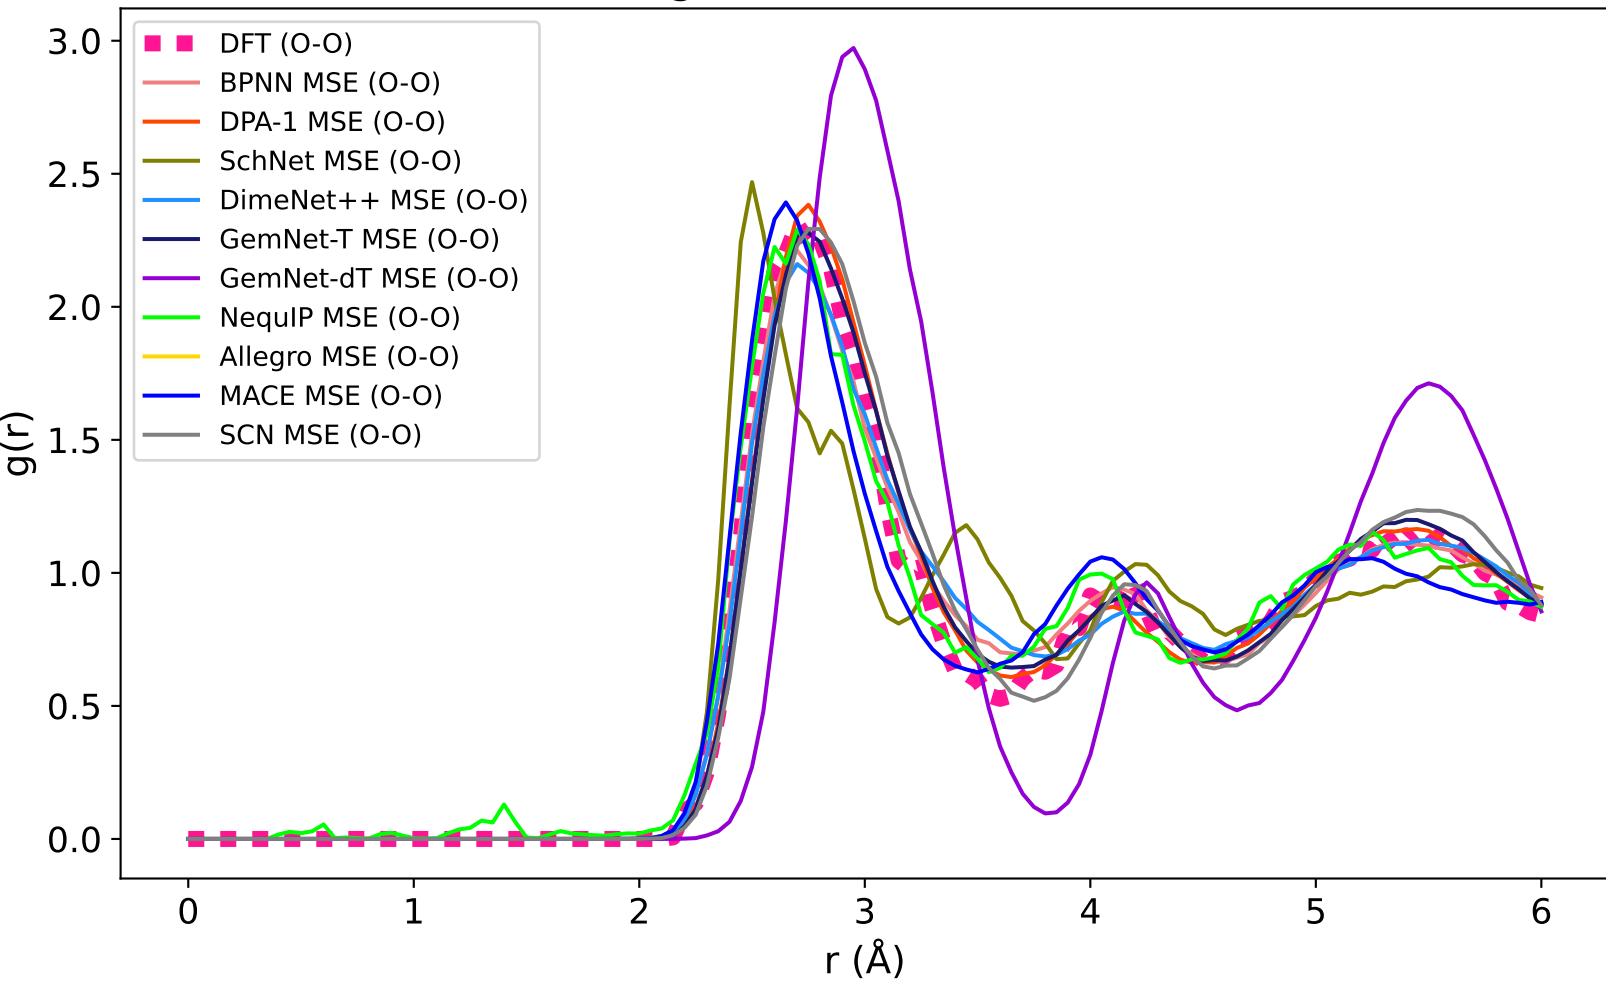

Supplement: supplementary_material [file attachment]

Hexagonal (2), 1200K, (Hf-Hf)

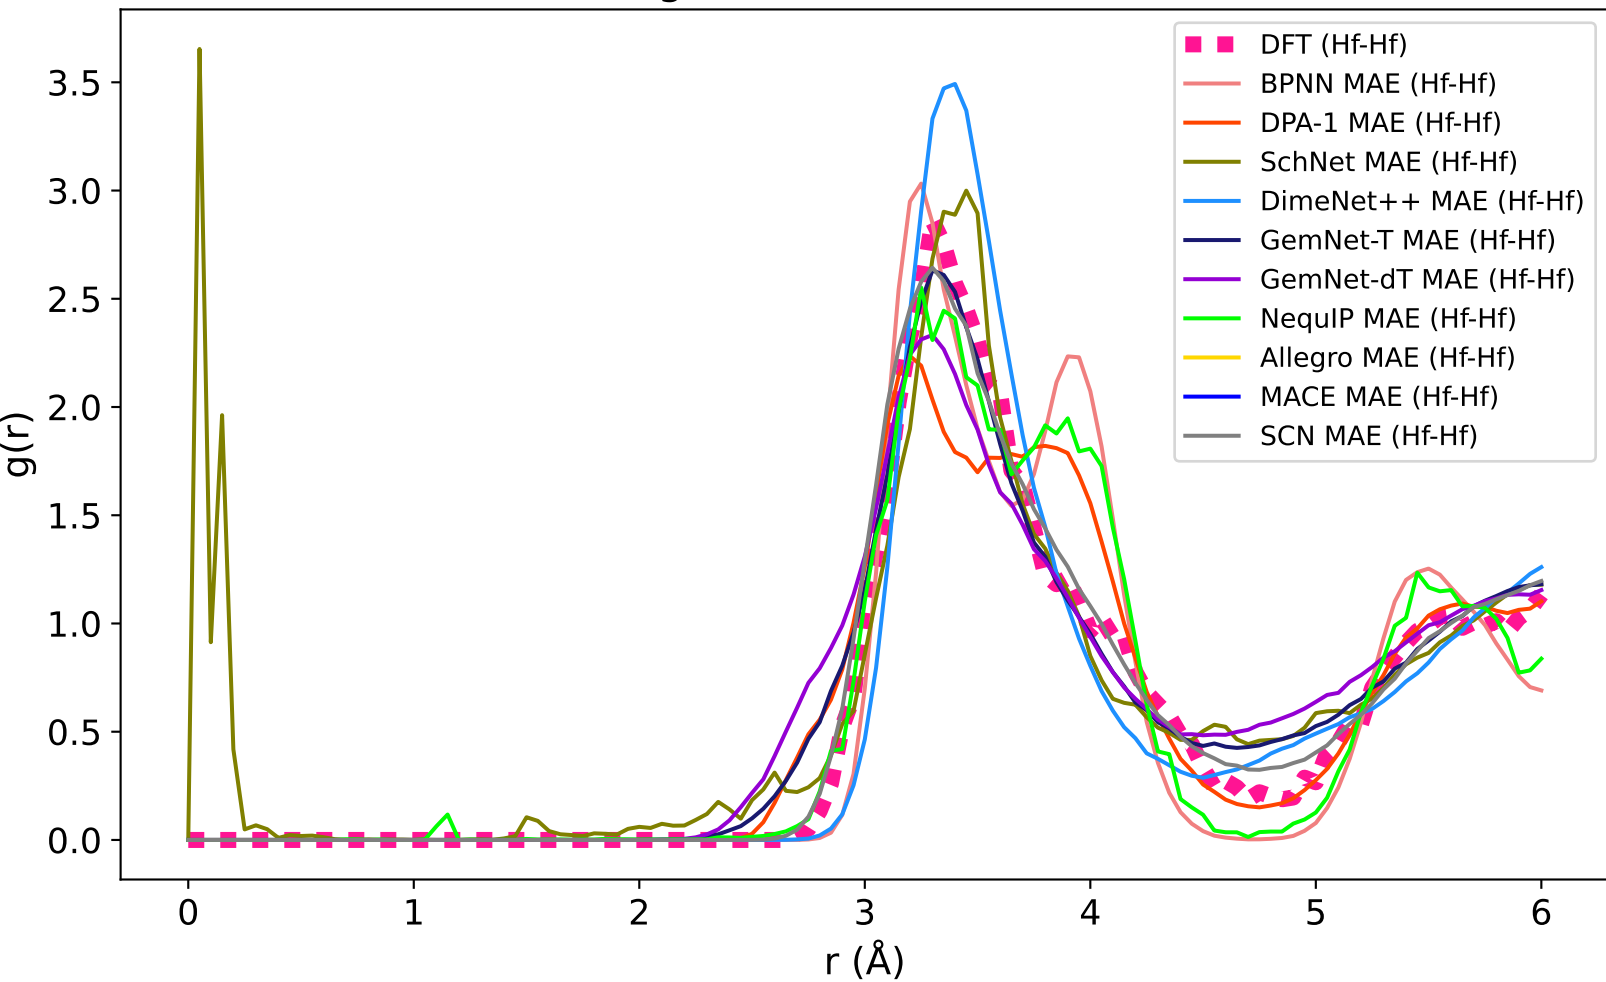

Supplement: supplementary_material [file attachment]

Cubic (1), 1800K, (O-O)

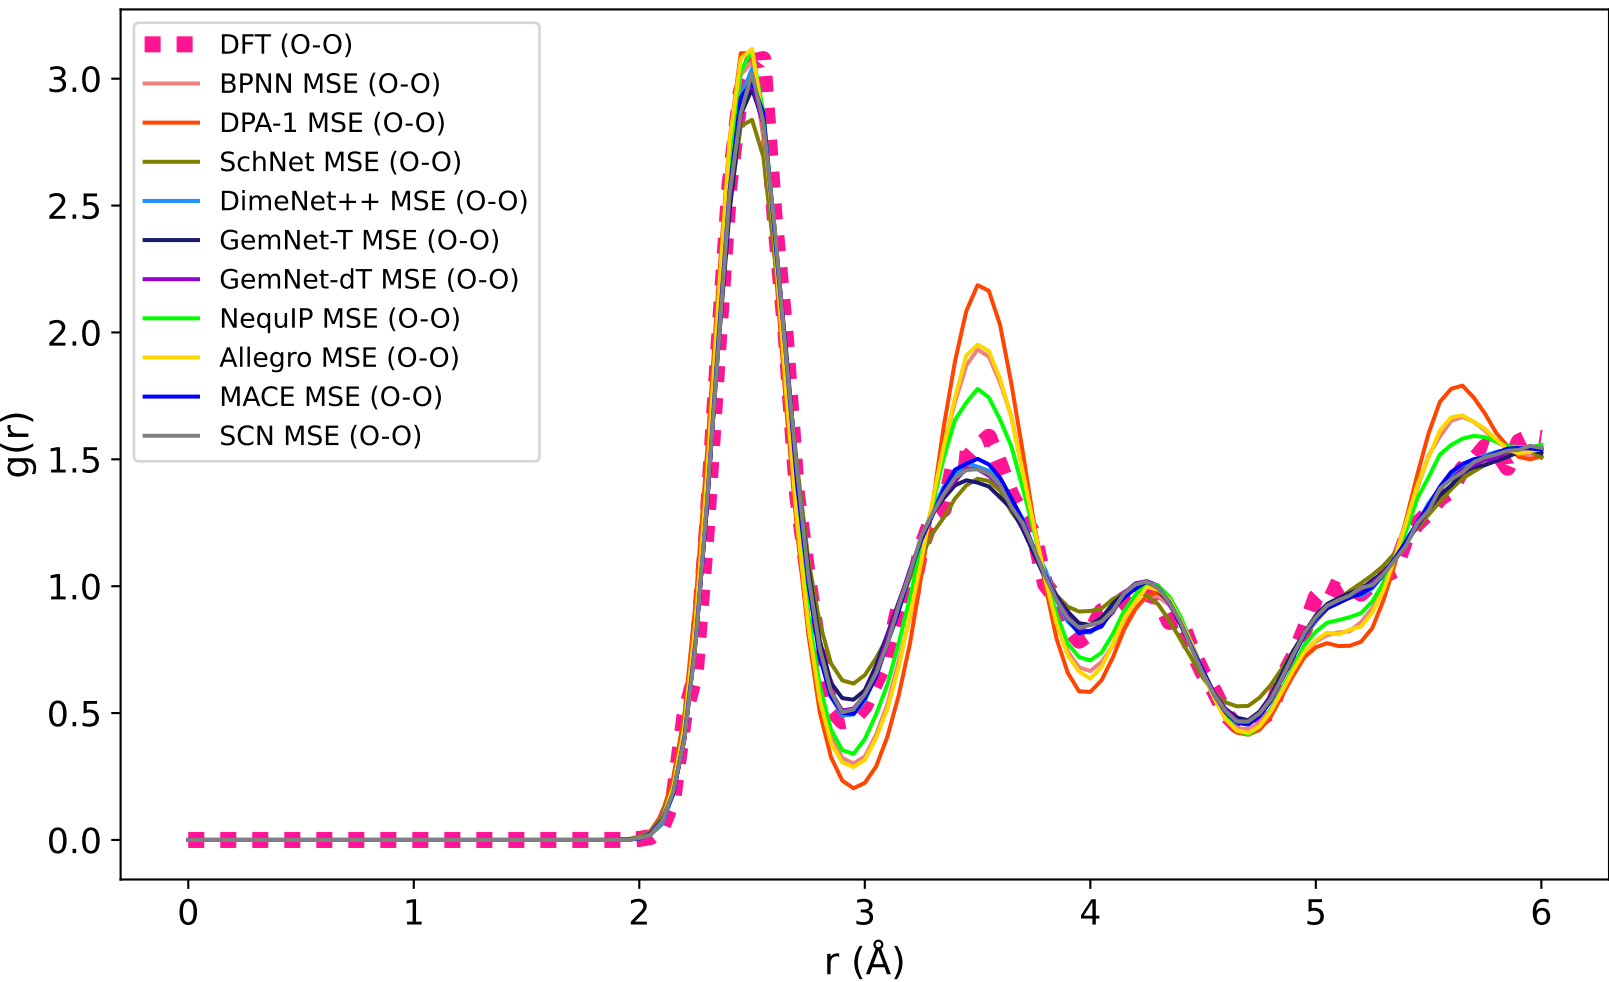

Supplement: supplementary_material [file attachment]

Triclinic, 1200K, (Si-N)

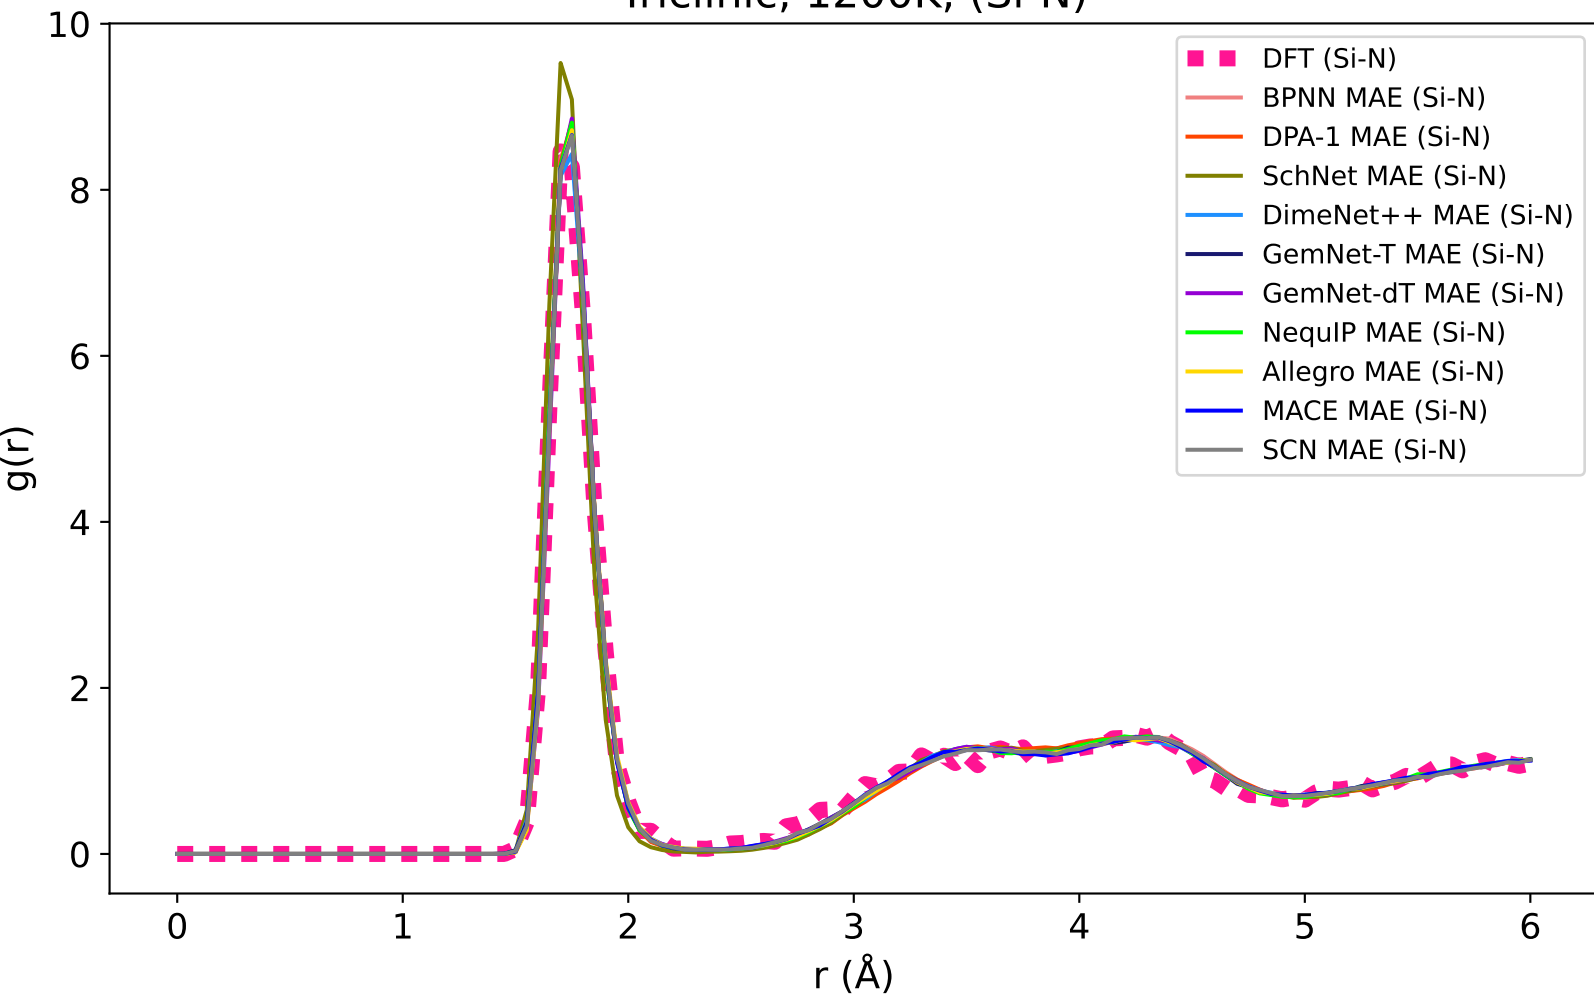

Supplement: supplementary_material [file attachment]

# Fd3m, 88 atoms

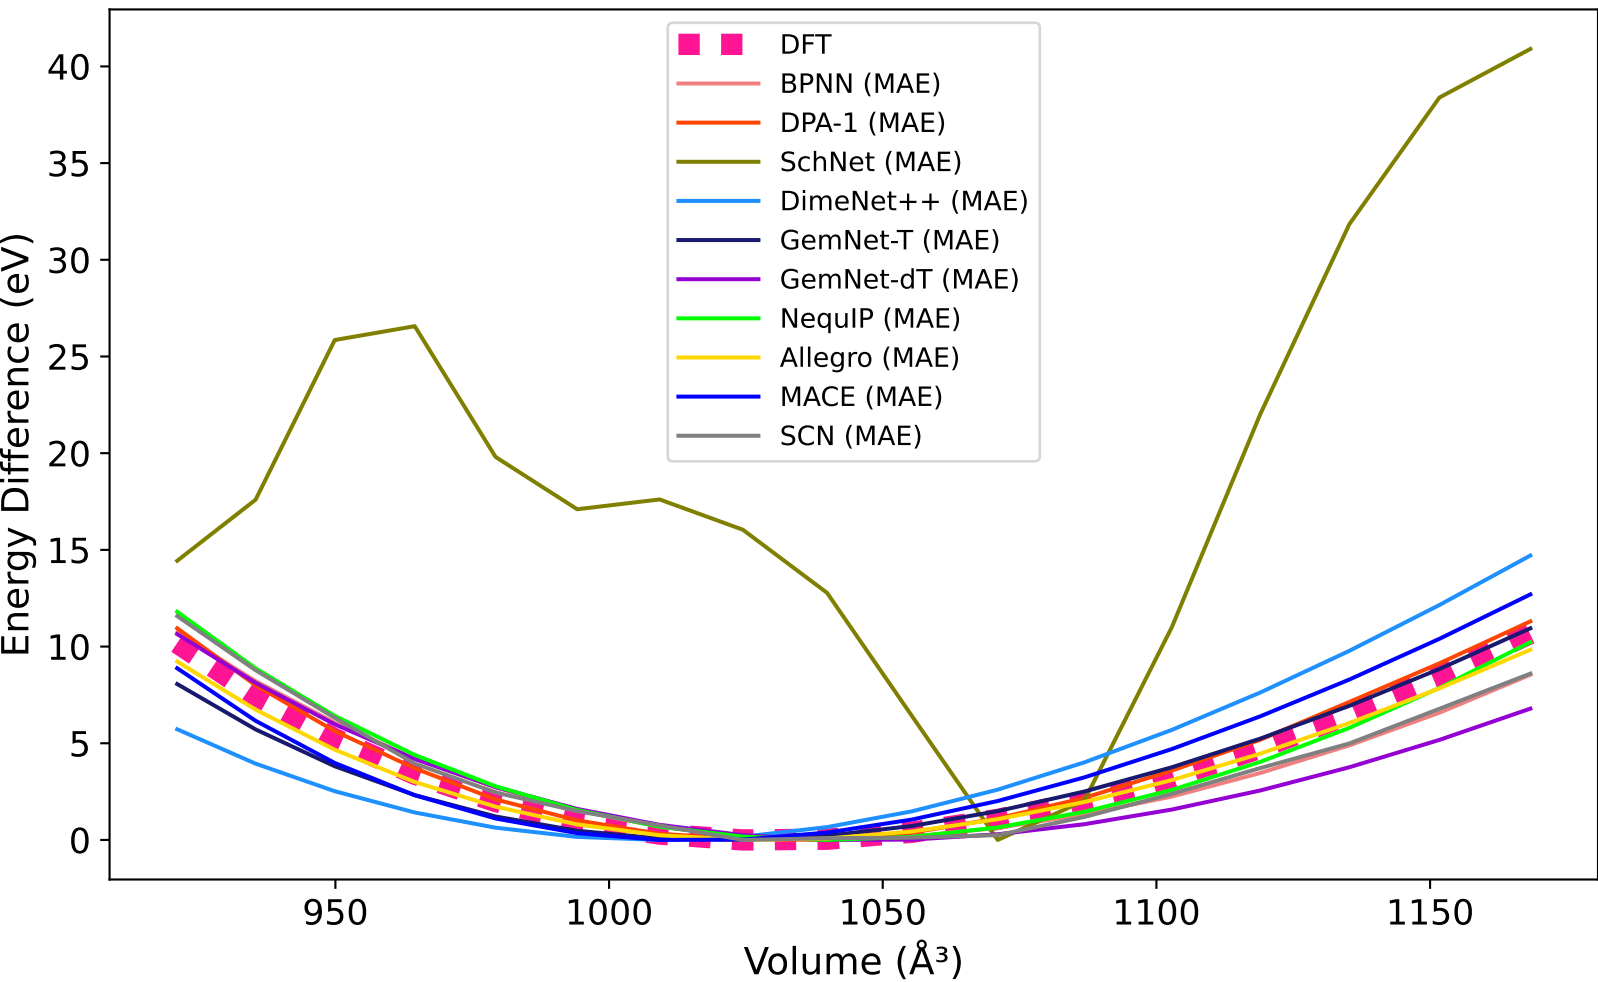

Supplement: supplementary_material [file attachment]

# Hexagonal (1), 1200K, (Hf-Hf)

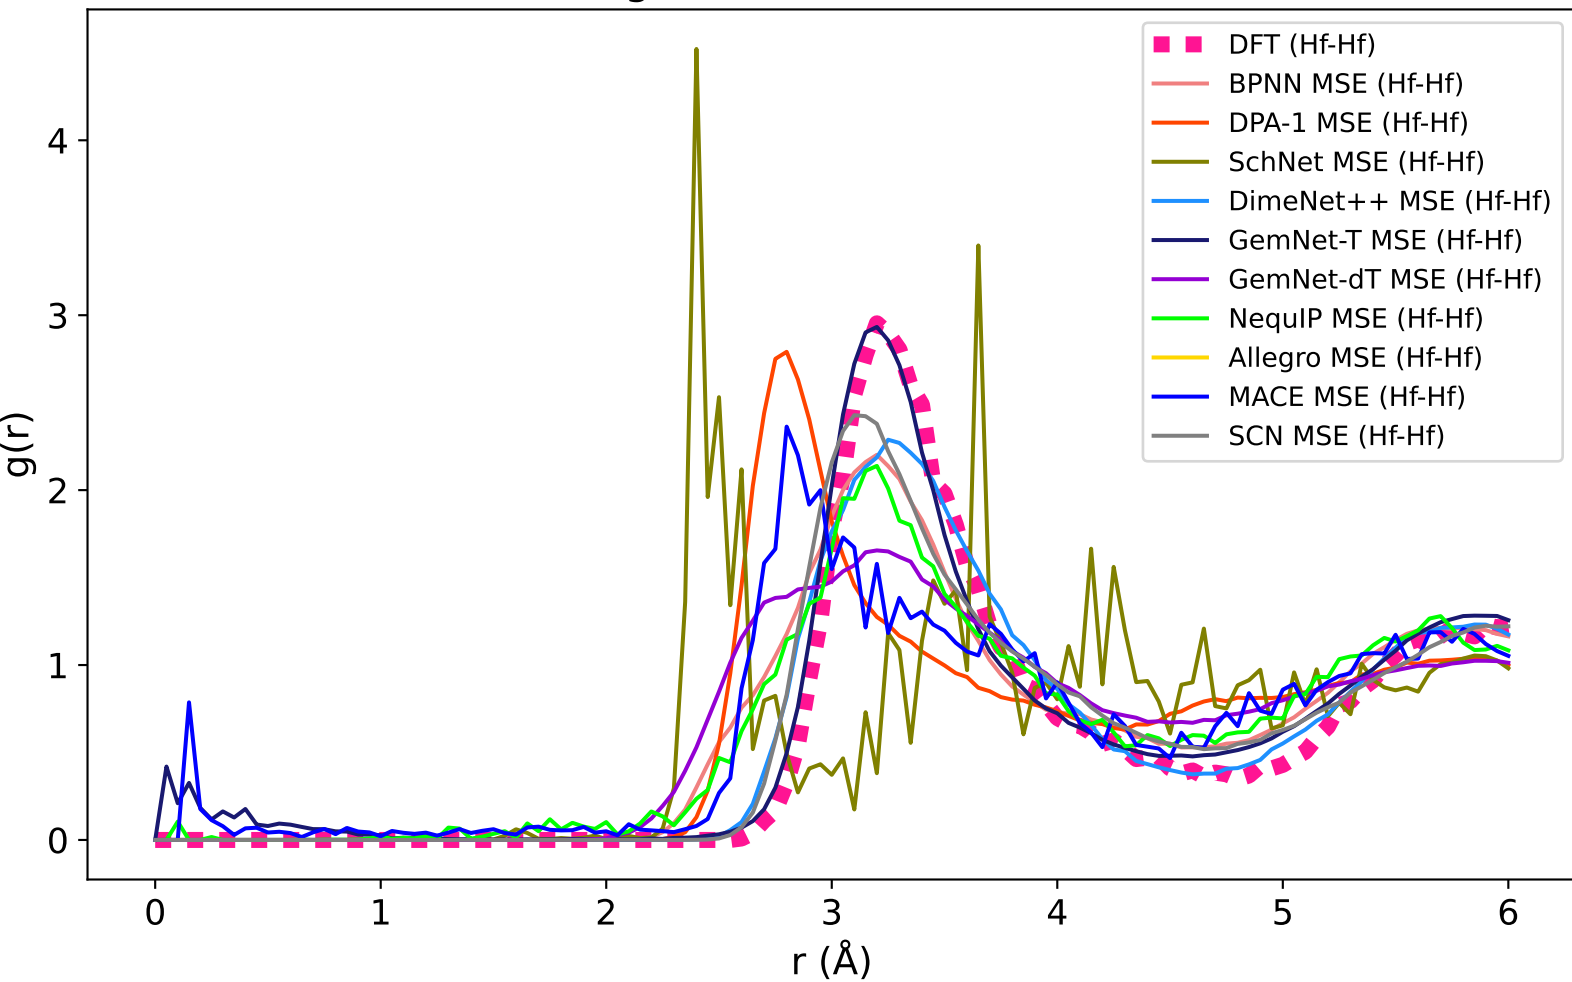

Supplement: supplementary_material [file attachment]

P2<sub>1</sub>/c, 96 atoms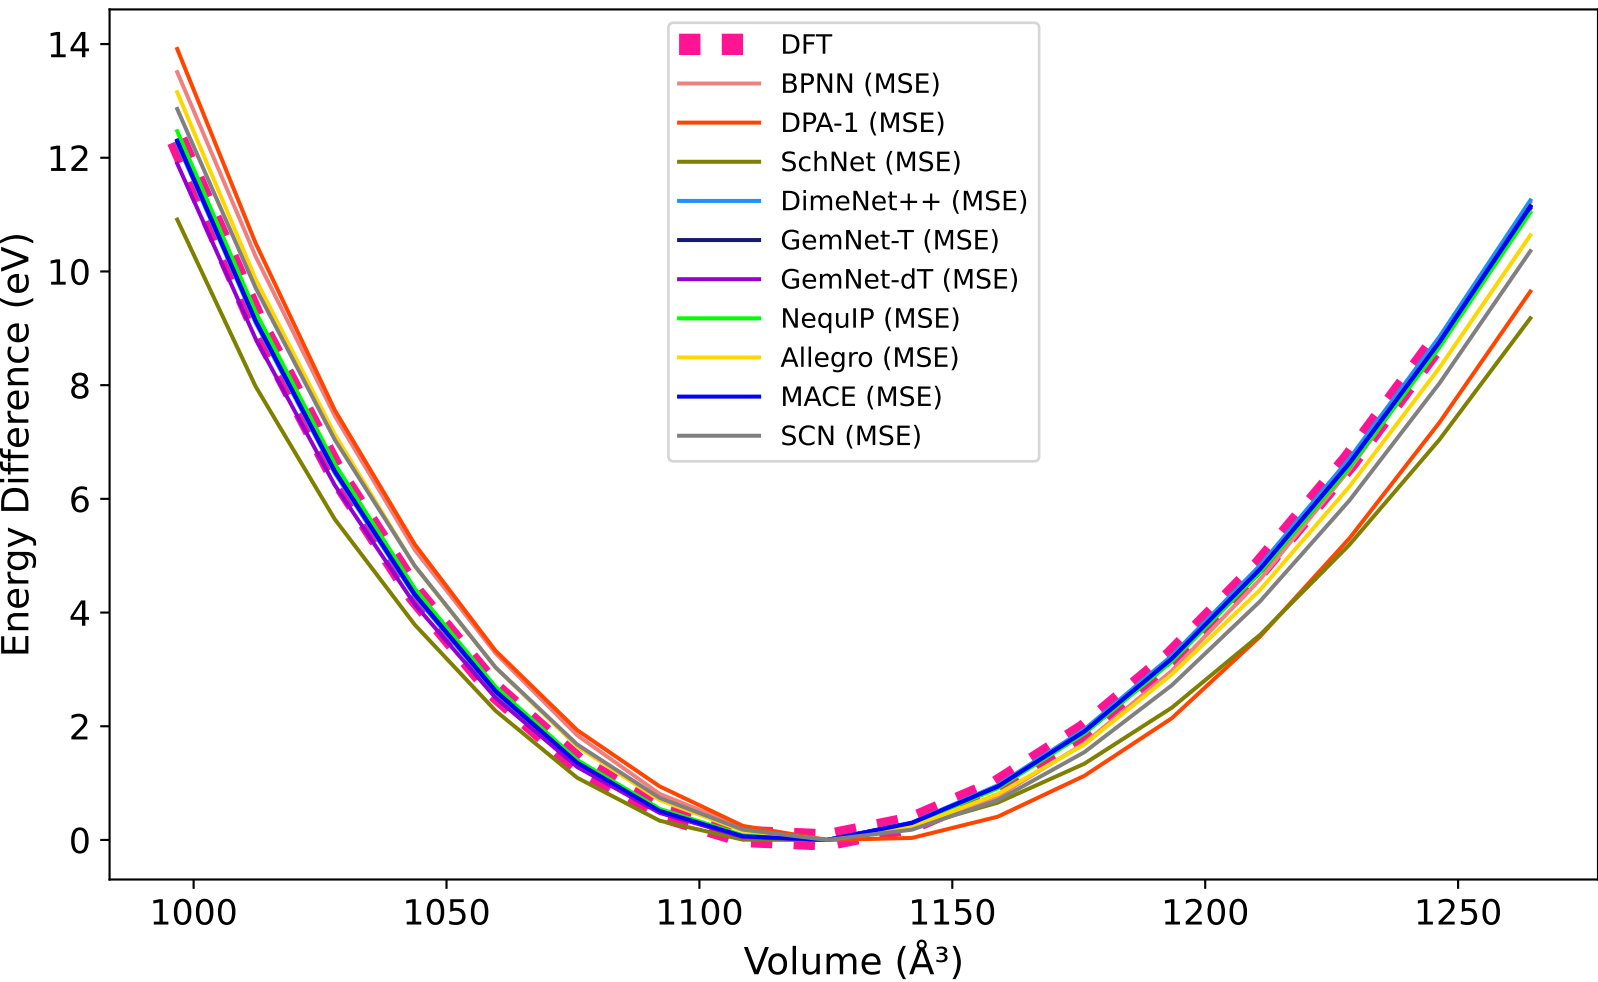

Supplement: supplementary_material [file attachment]

## Orthorhombic (2), 1200K, (Hf-Hf)

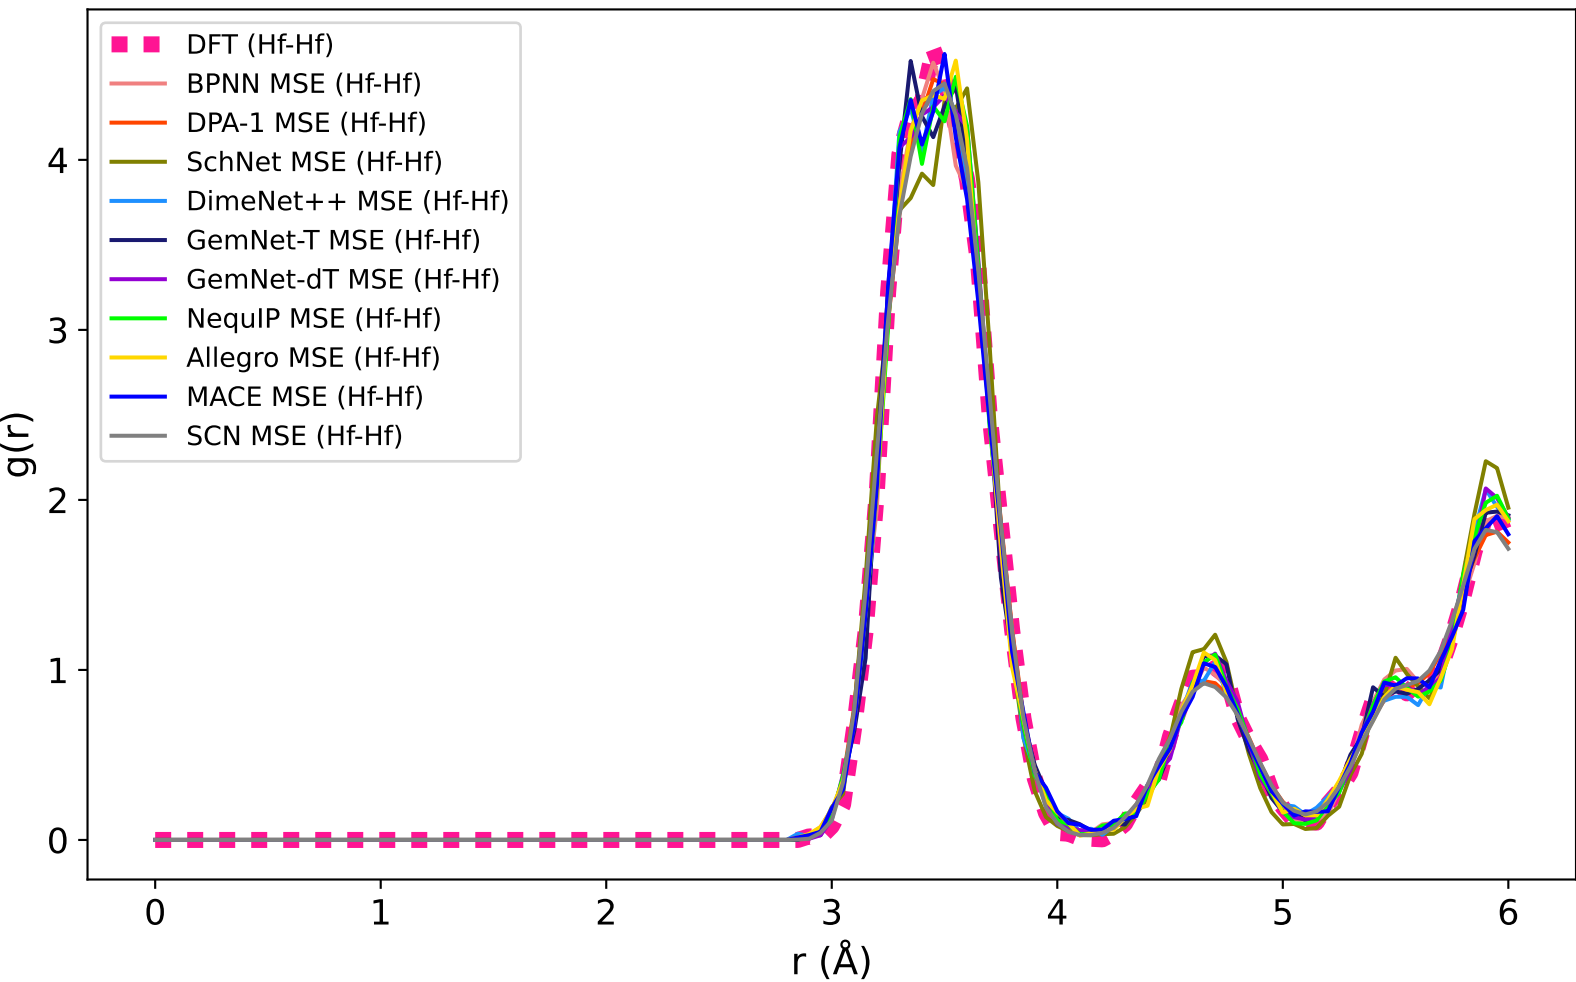

Supplement: supplementary_material [file attachment]

Cubic (1), 1200K, (Hf-Hf)

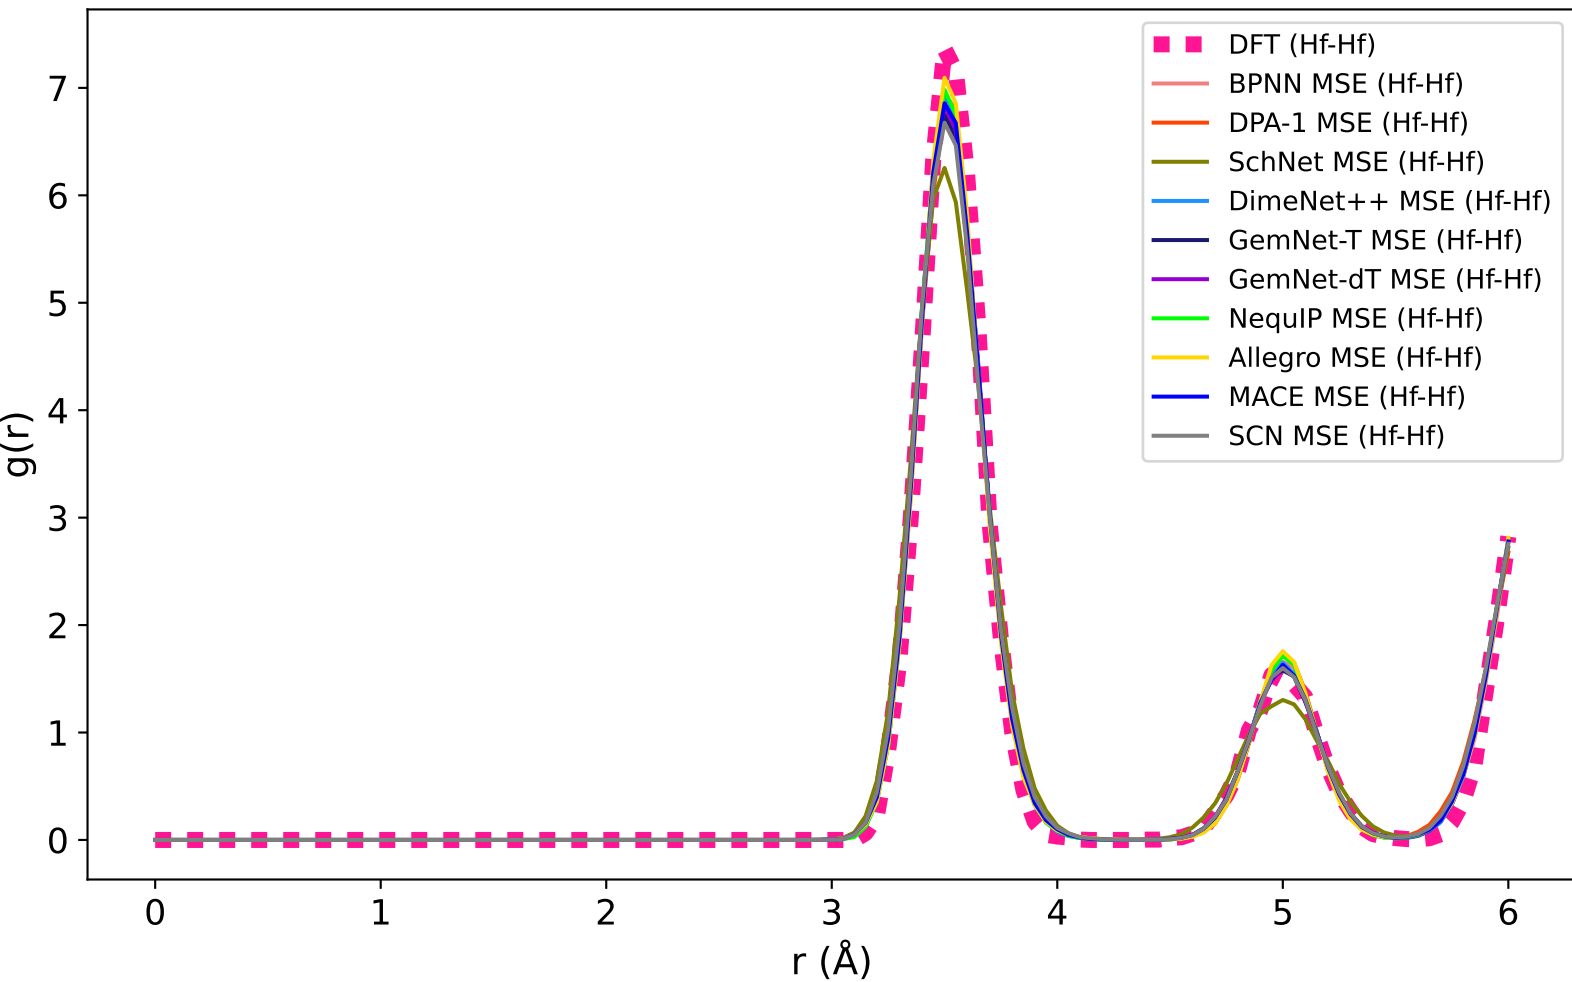

Supplement: supplementary_material [file attachment]

Triclinic, 1200K, (Si-N)

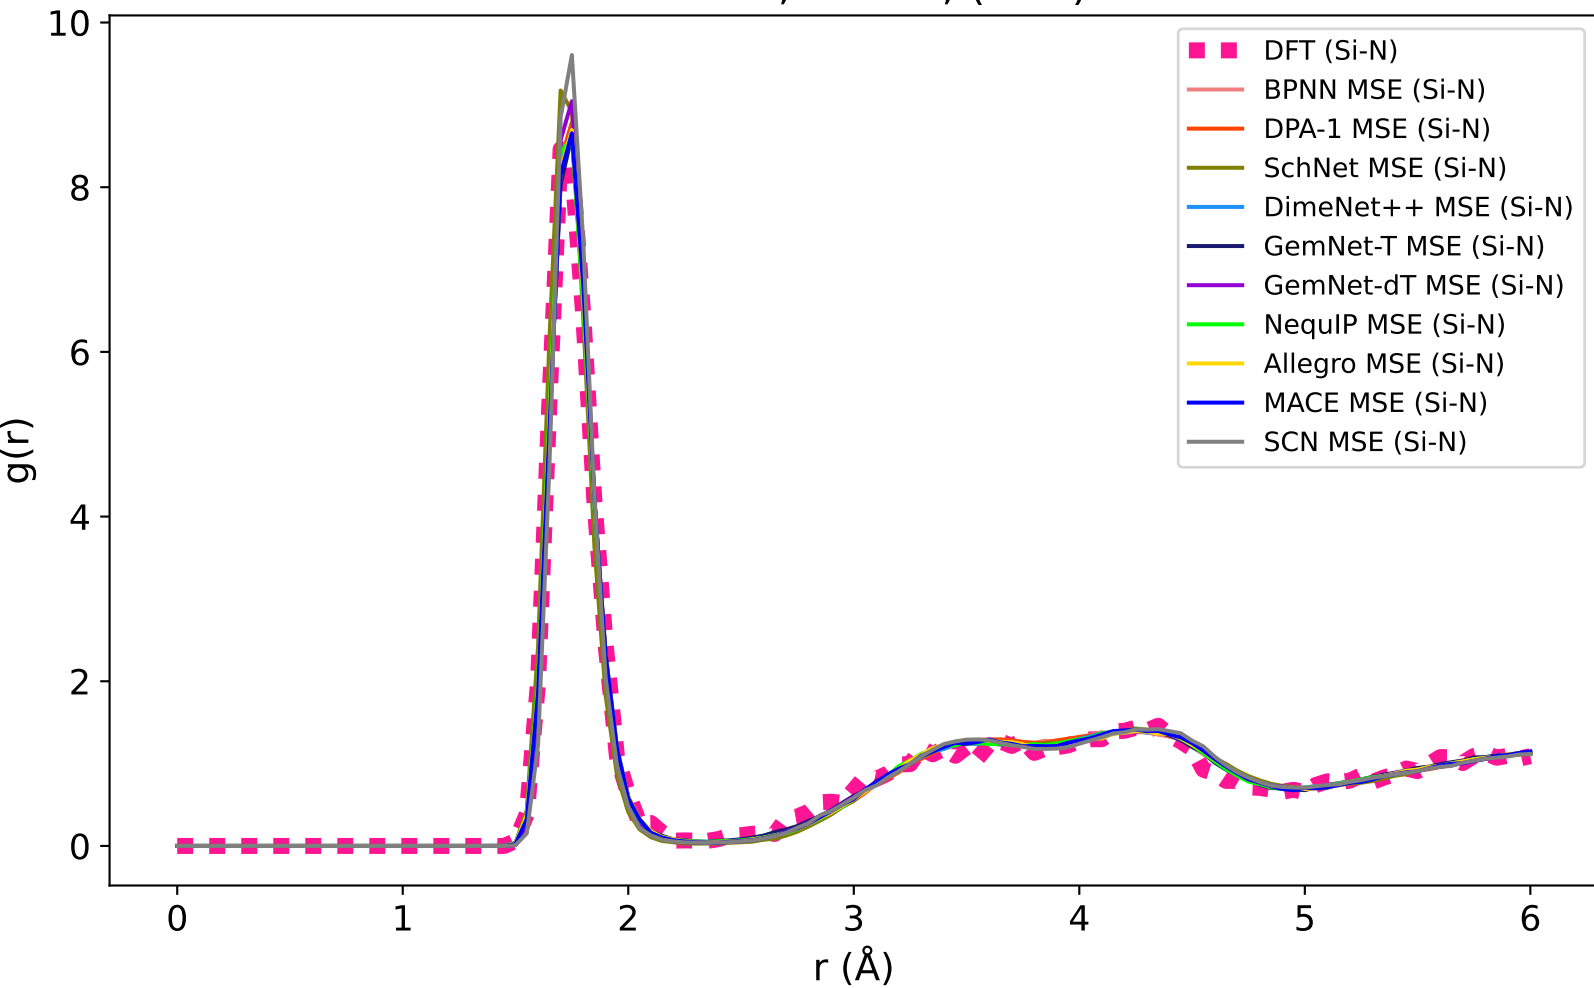

Supplement: supplementary_material [file attachment]

## Orthorhombic (1), 1800K, (Hf-Hf)

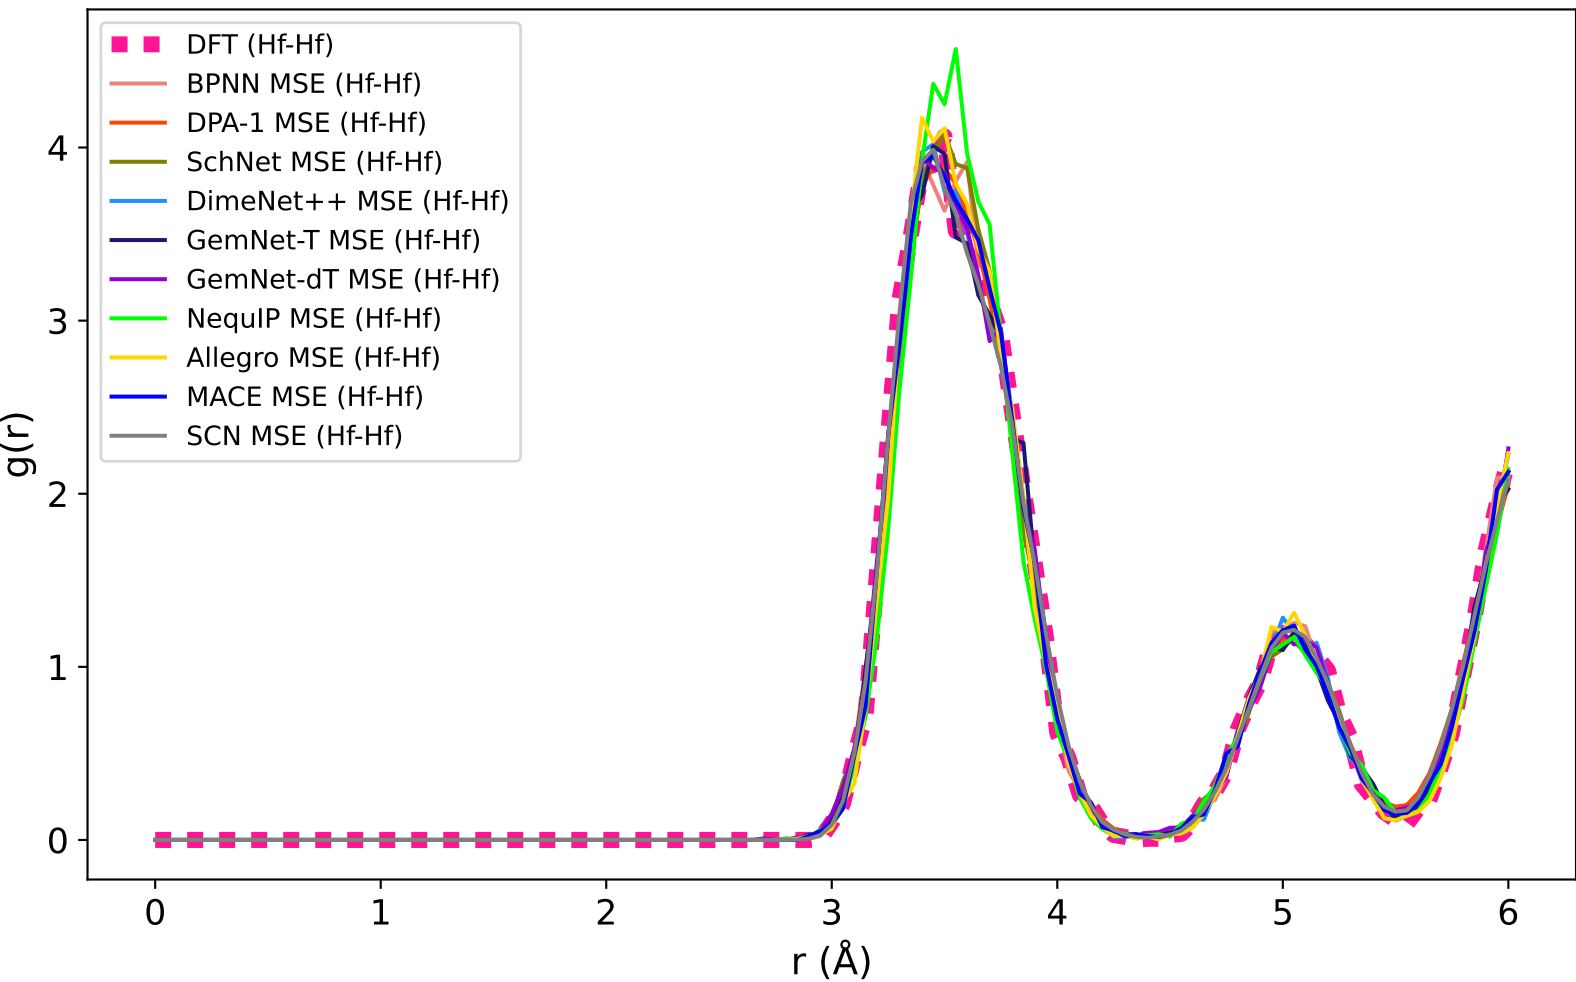

Supplement: supplementary_material [file attachment]

## Triclinic, 1200K, (Si-Si)

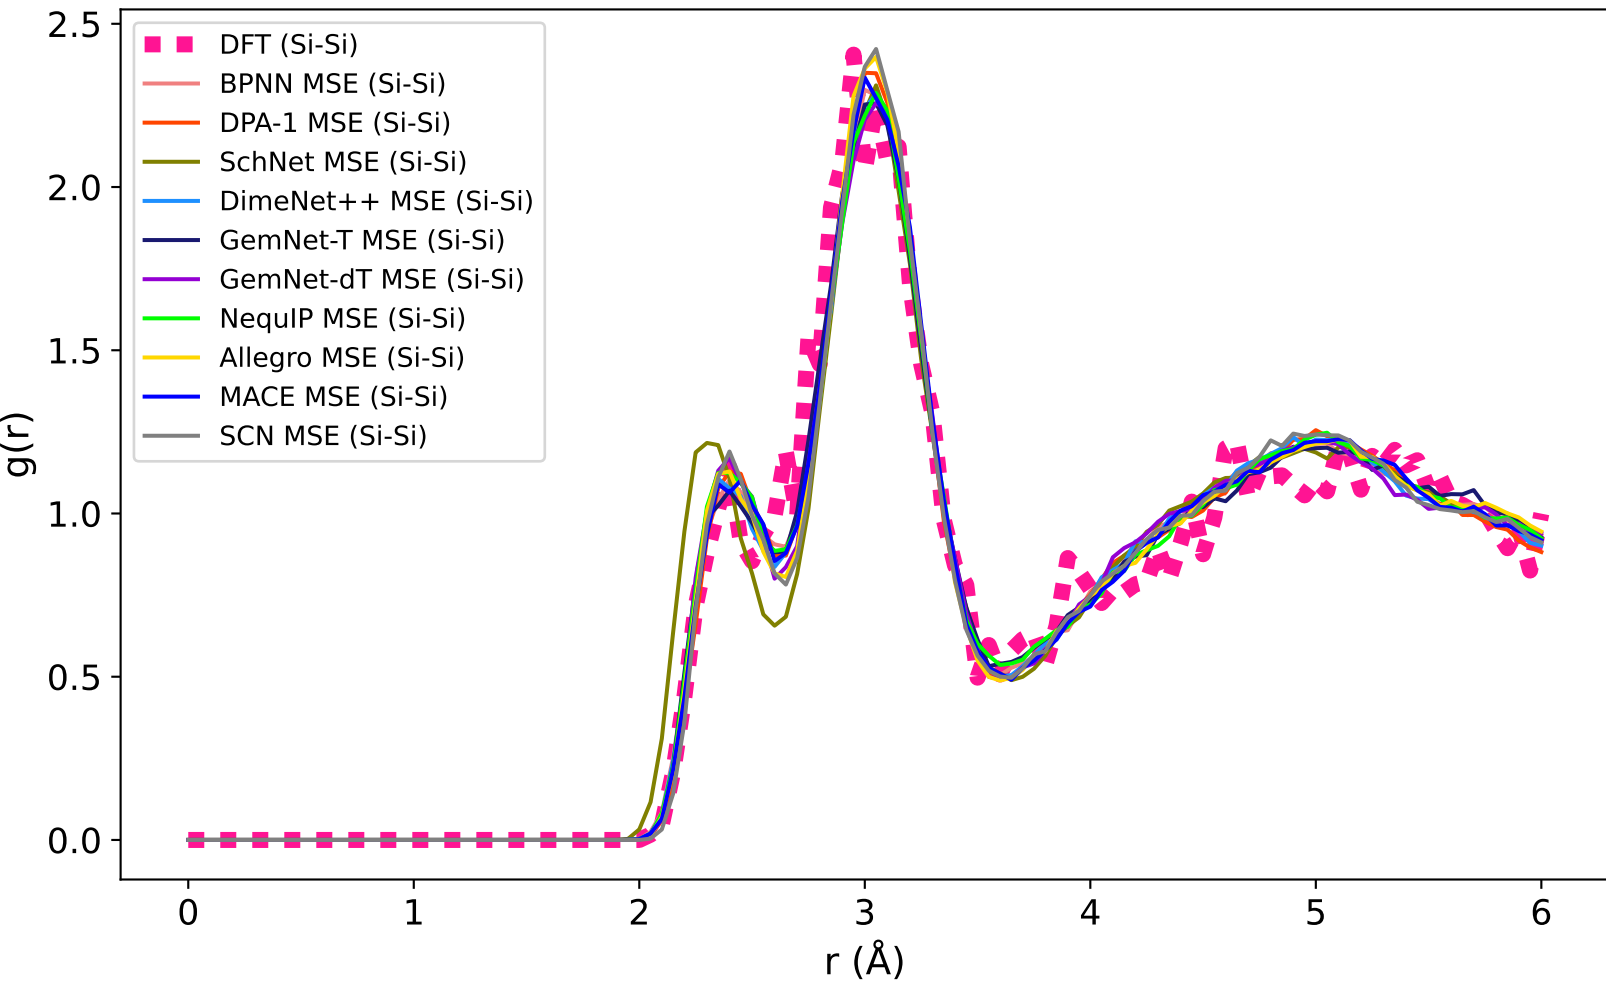

Supplement: supplementary_material [file attachment]

Triclinic, 1200K, (Si-Si)

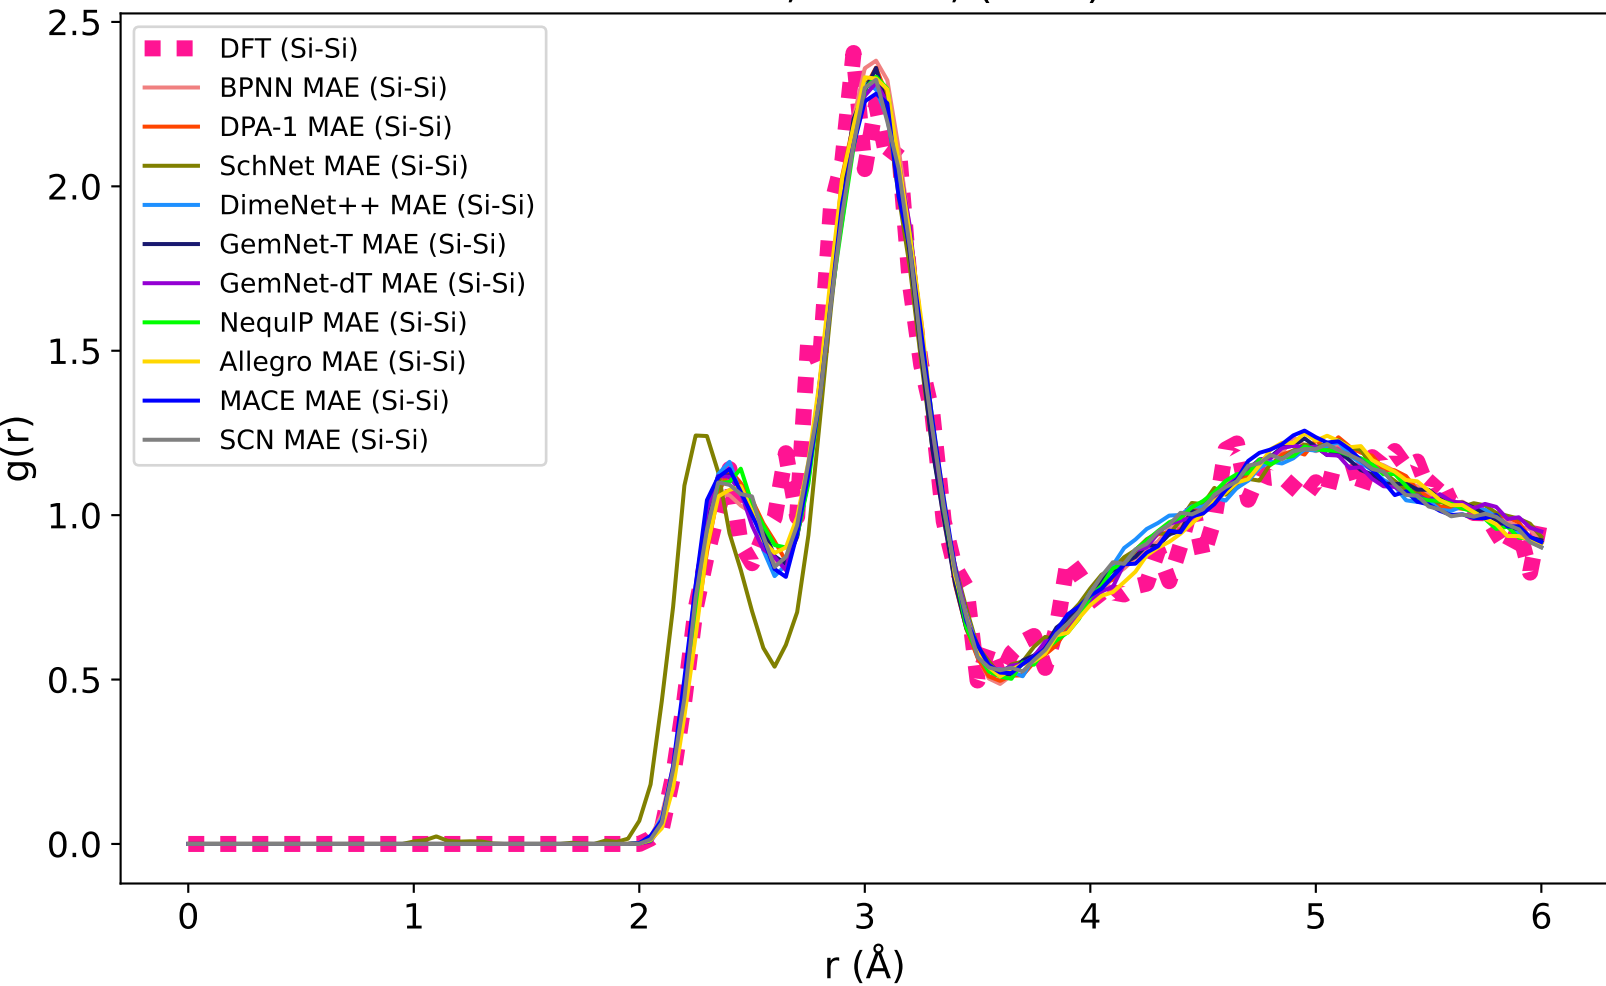

Supplement: supplementary_material [file attachment]

# Monoclinic, 1800K, (Hf-O)

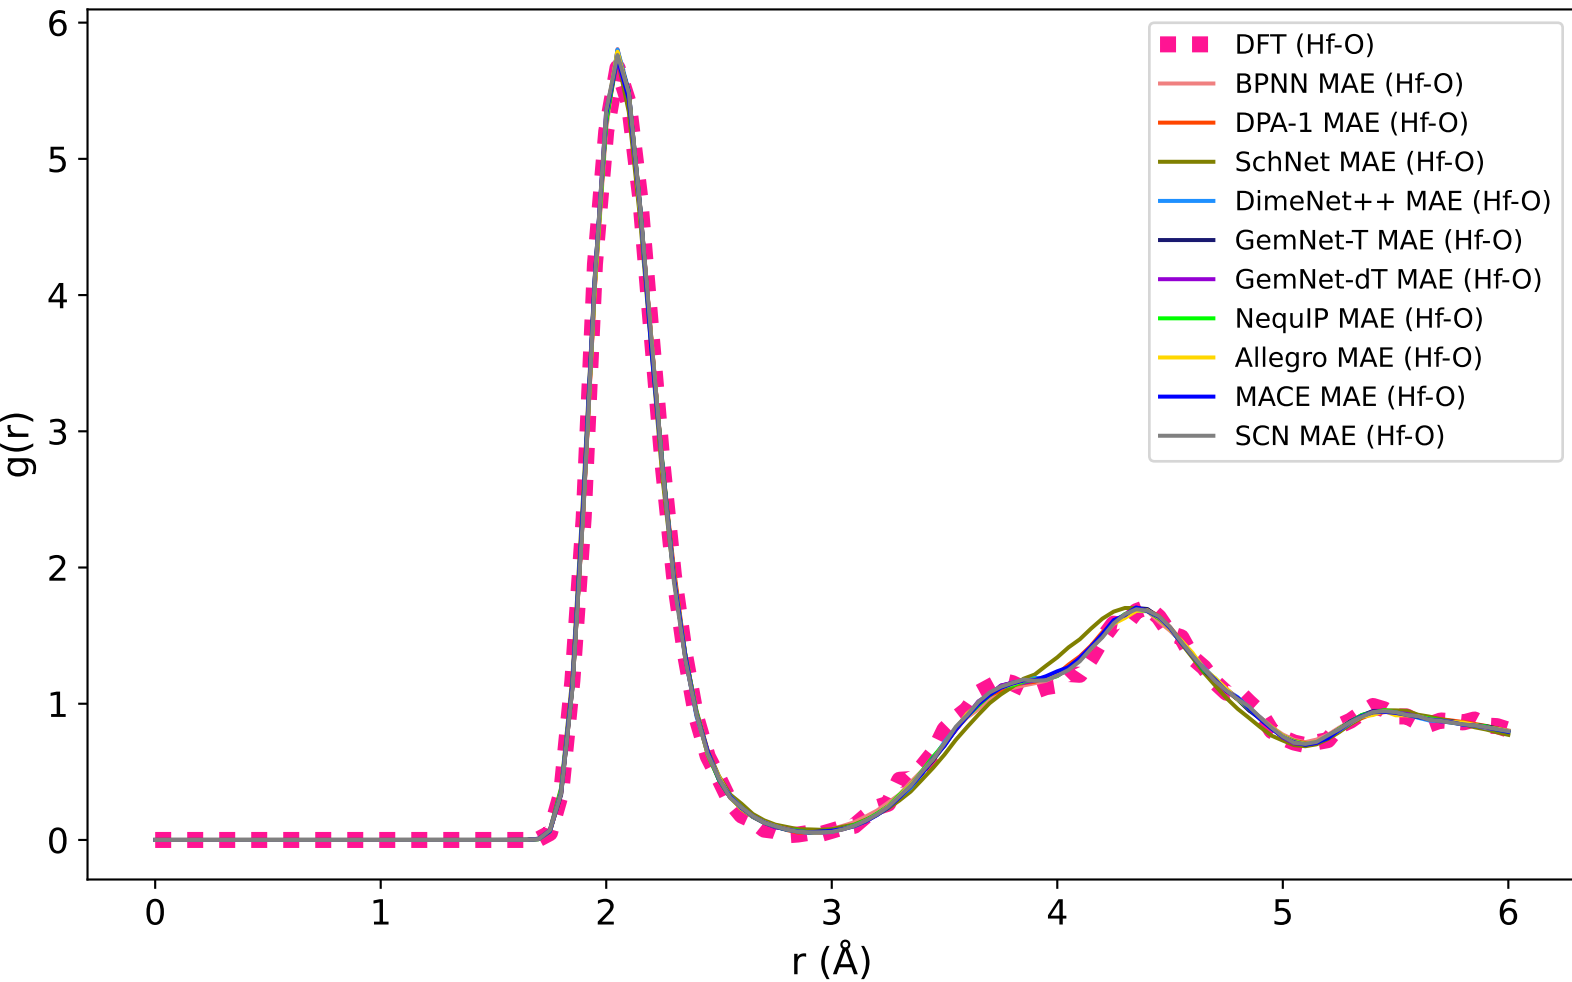

Supplement: supplementary_material [file attachment]

Cubic (2), 1200K, (Hf-Hf)

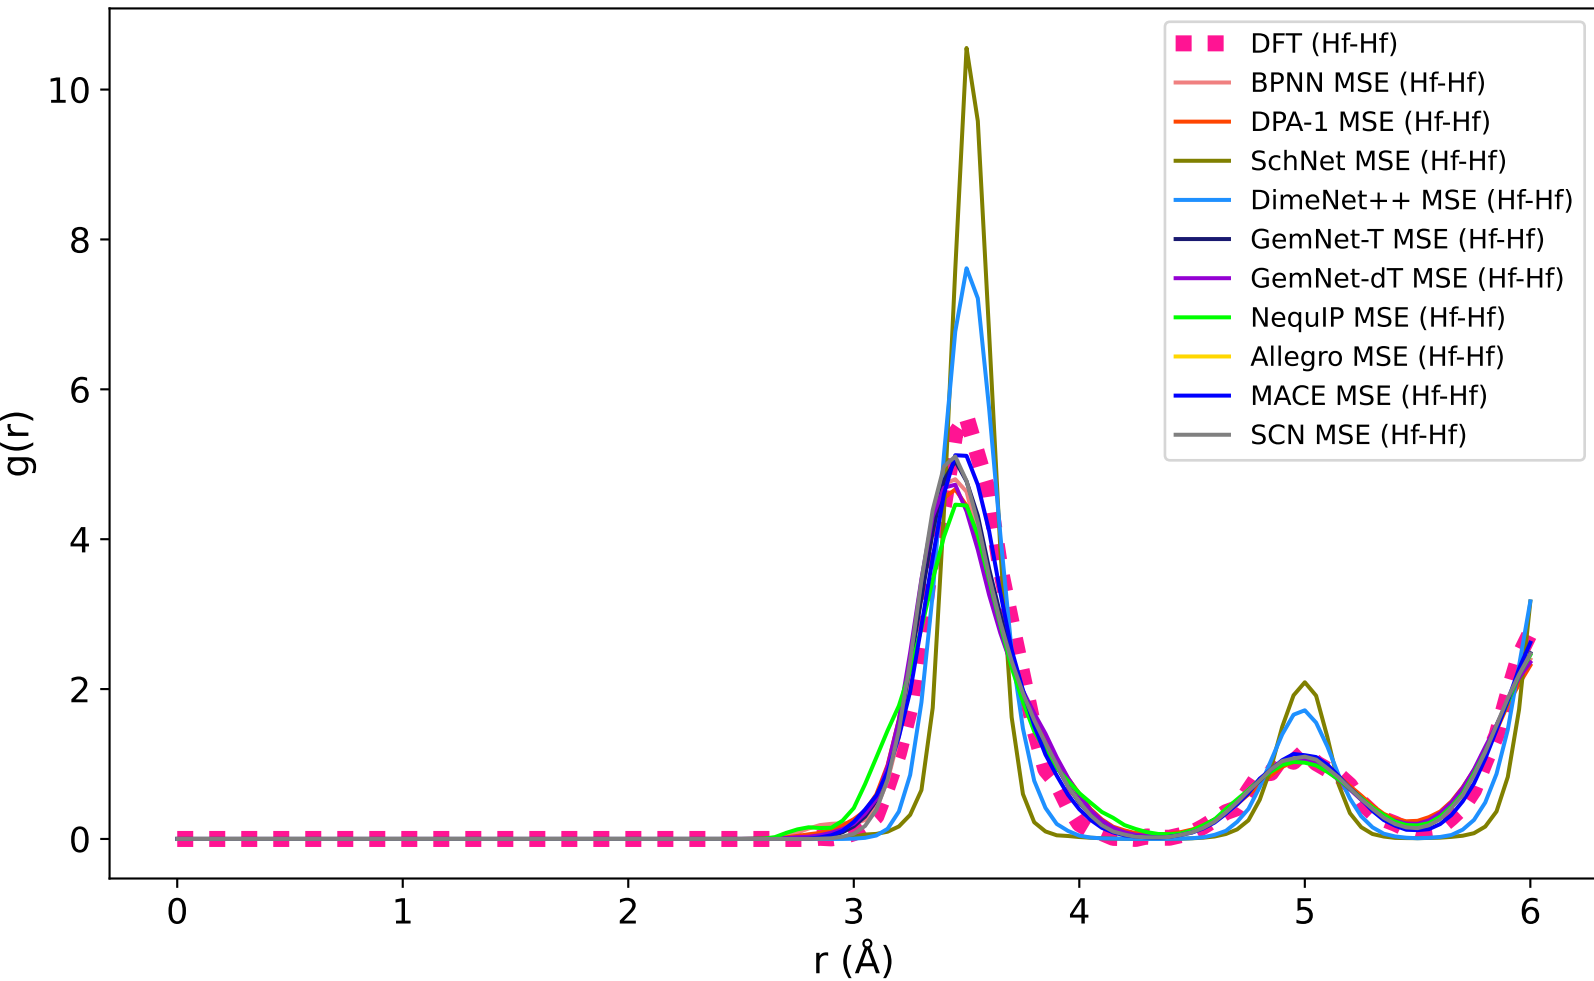

Supplement: supplementary_material [file attachment]

# Monoclinic, 1200K, (O-O)

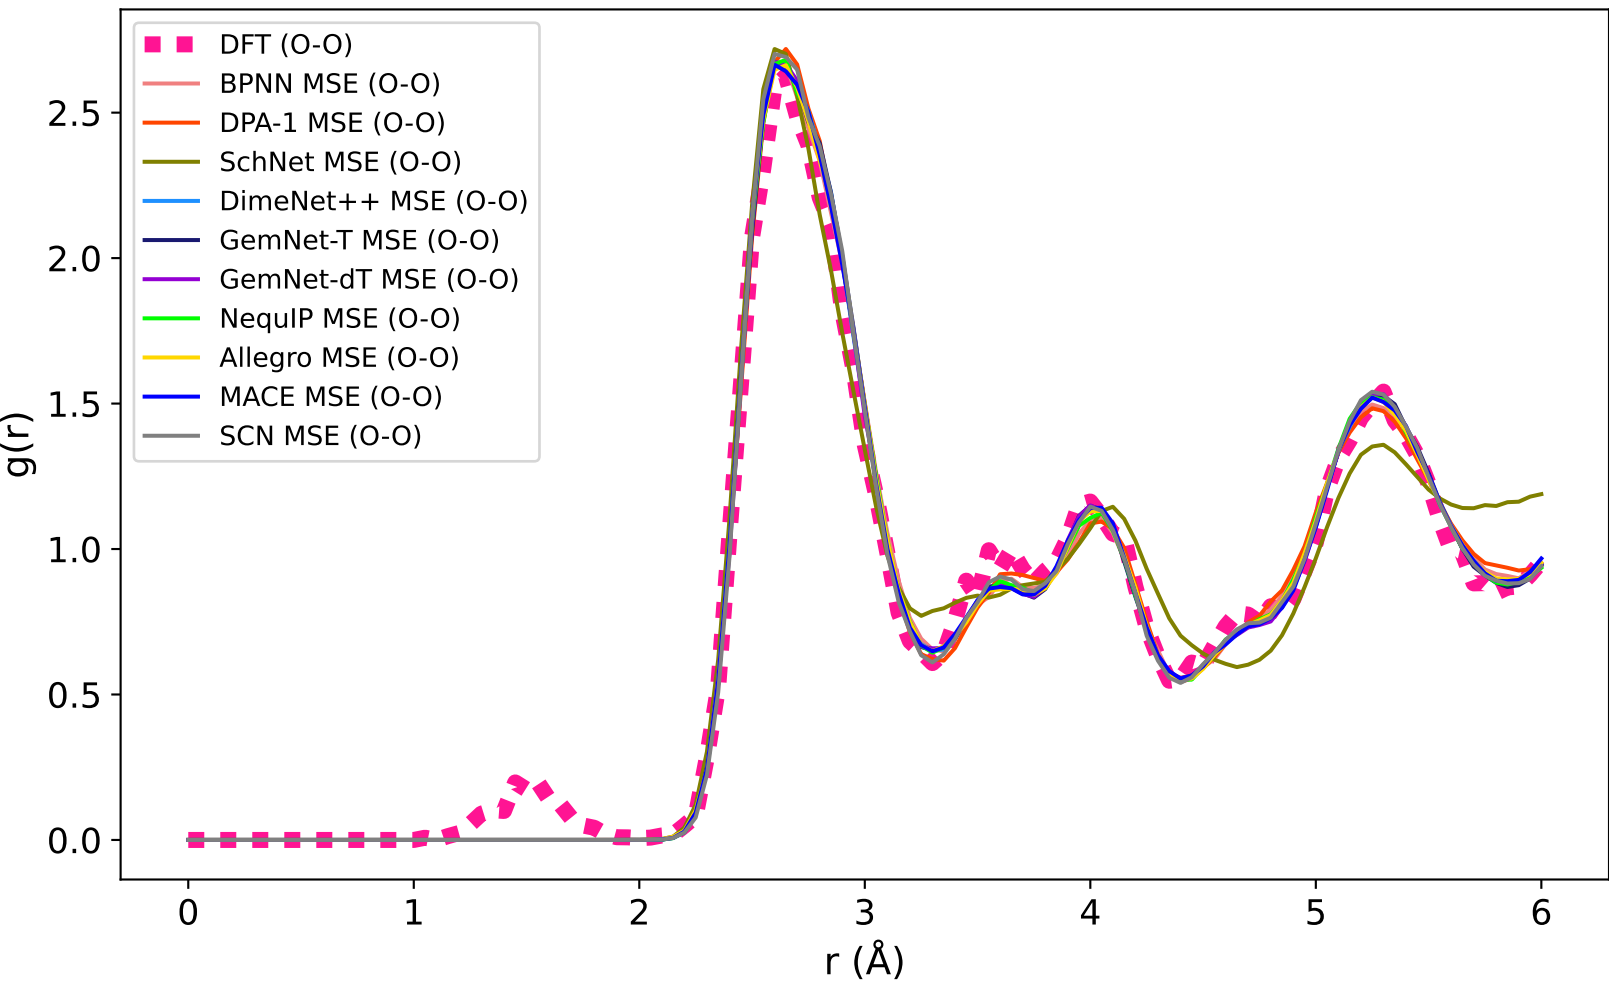

Supplement: supplementary_material [file attachment]

Cubic (2), 1200K, (Si-N)

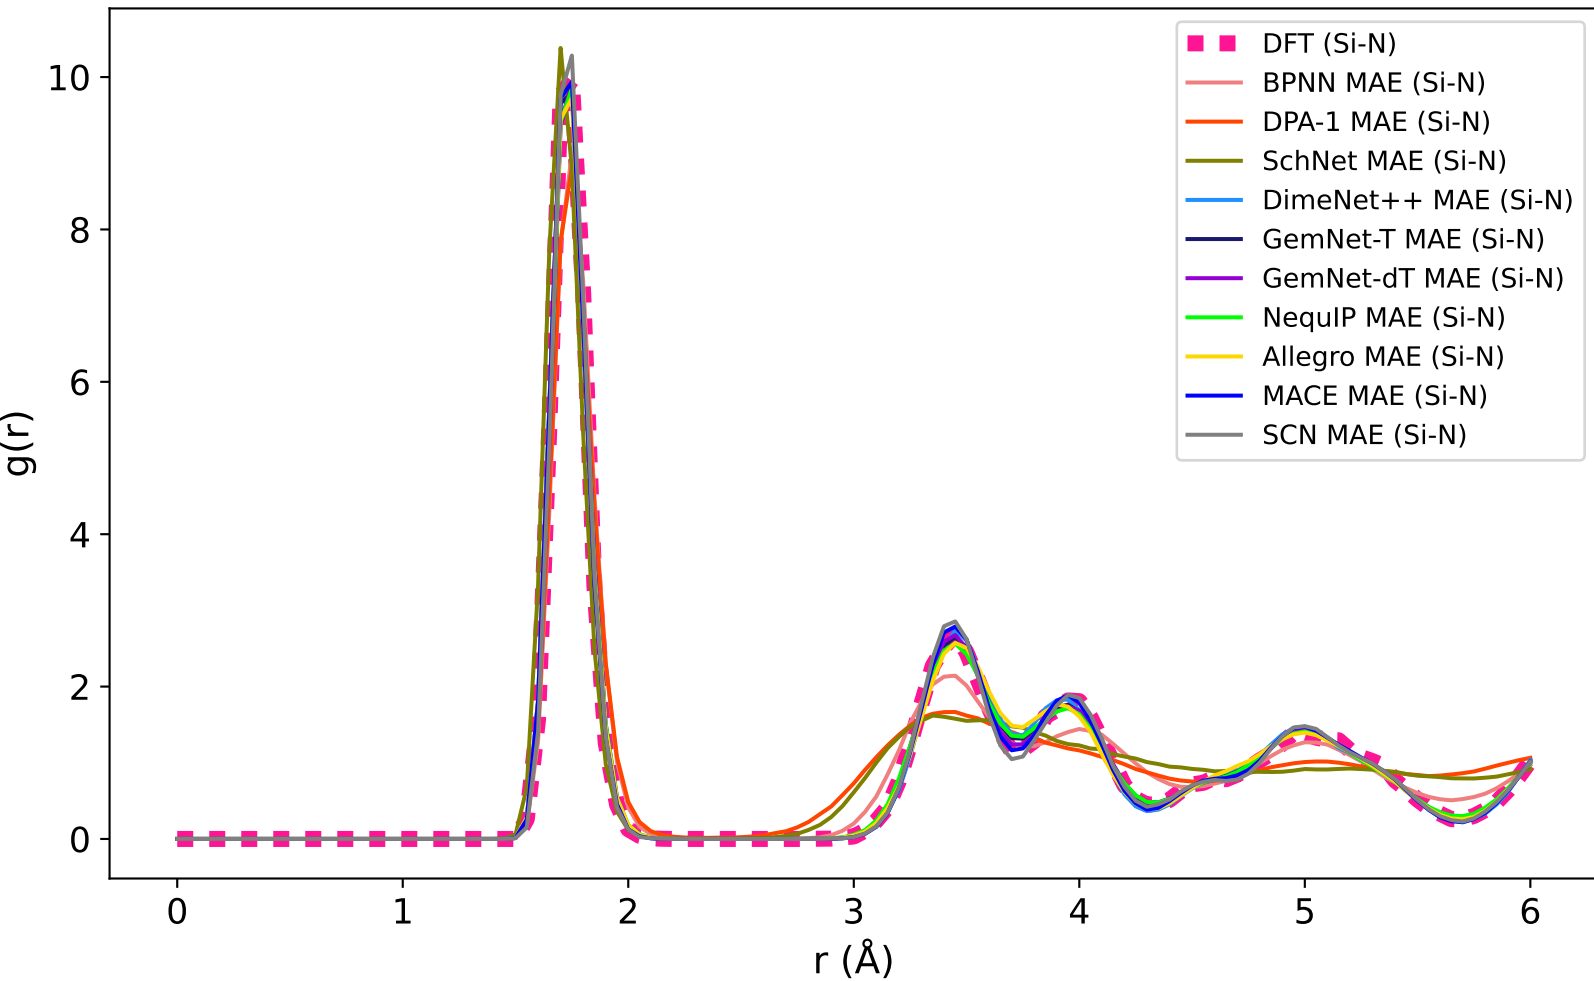

Supplement: supplementary_material [file attachment]

Cubic (2), 1200K, (Si-N)

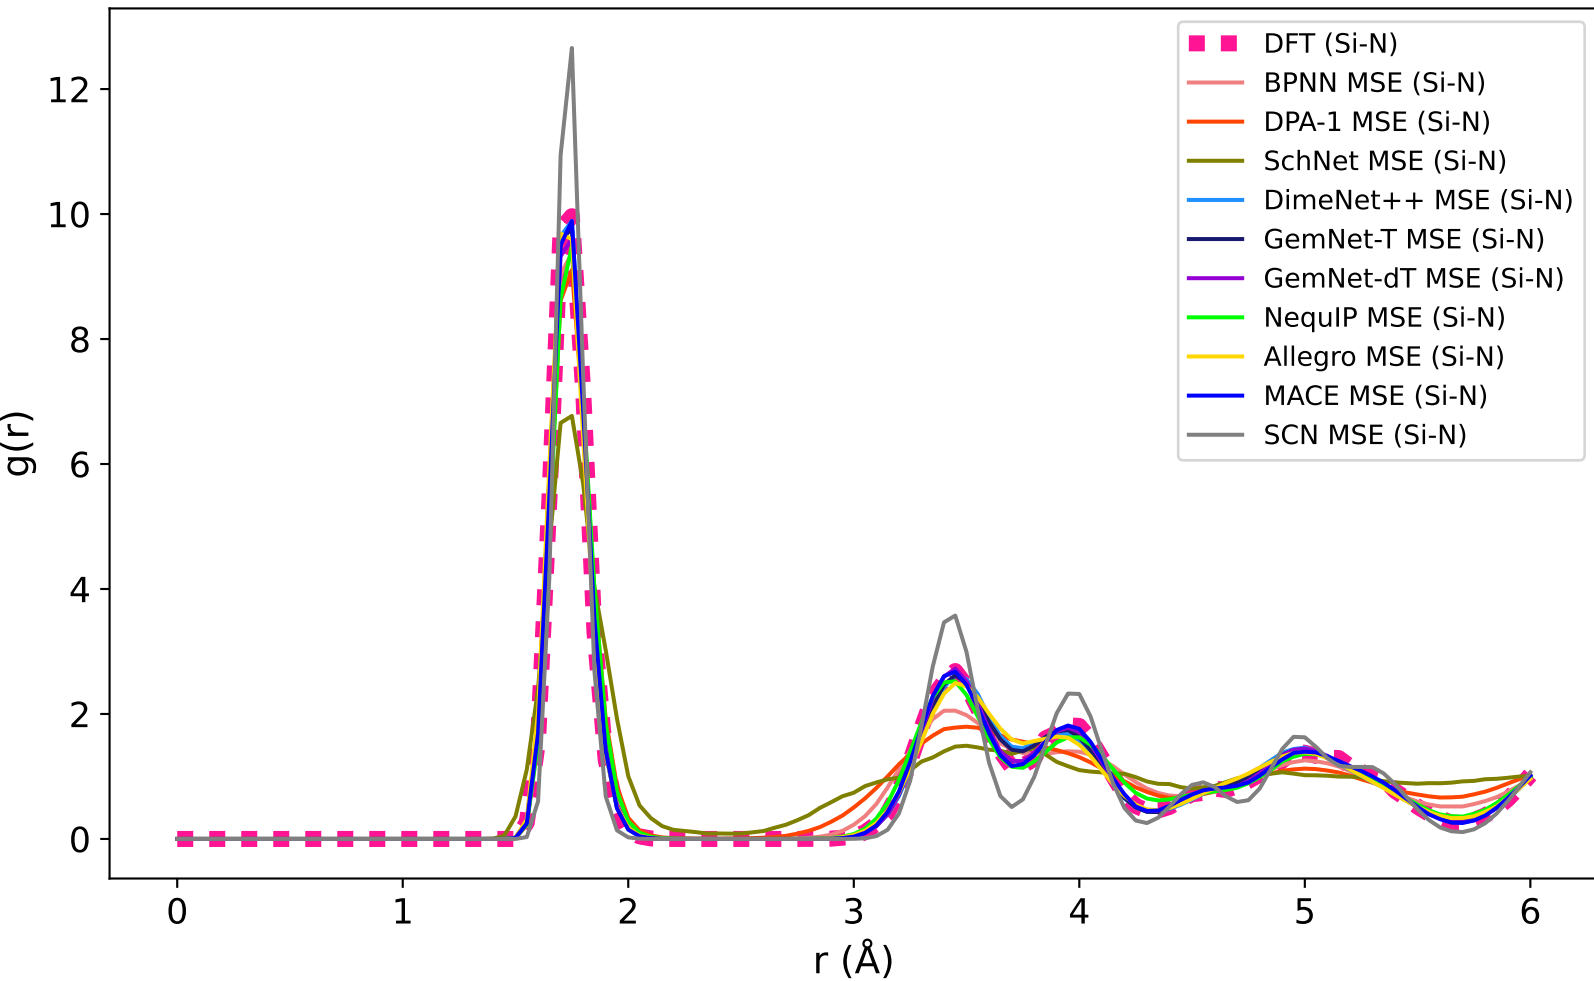

Supplement: supplementary_material [file attachment]

# Hexagonal (1), 1200K, (Hf-Hf)

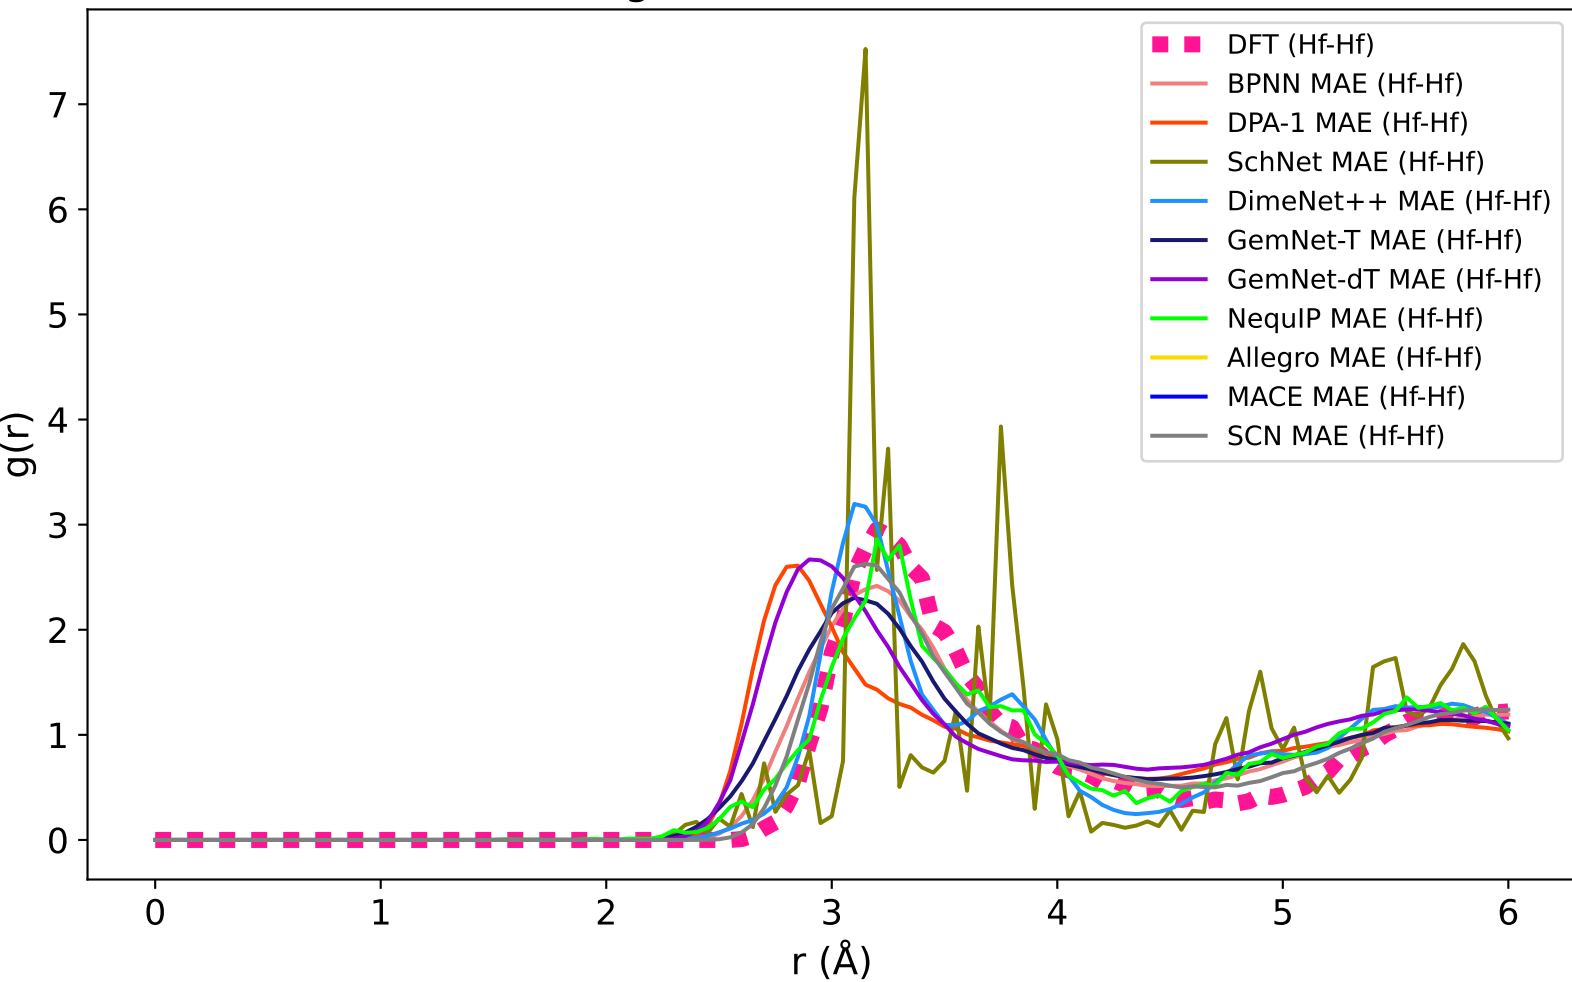

Supplement: supplementary_material [file attachment]
