# Supplementary material (part 2 of 2)
Source: ML conference proceedings conference paper supplement (https://openreview.net/forum?id=hr9Bd1A9Un)

Cubic (1), 1800K, (Hf-O)

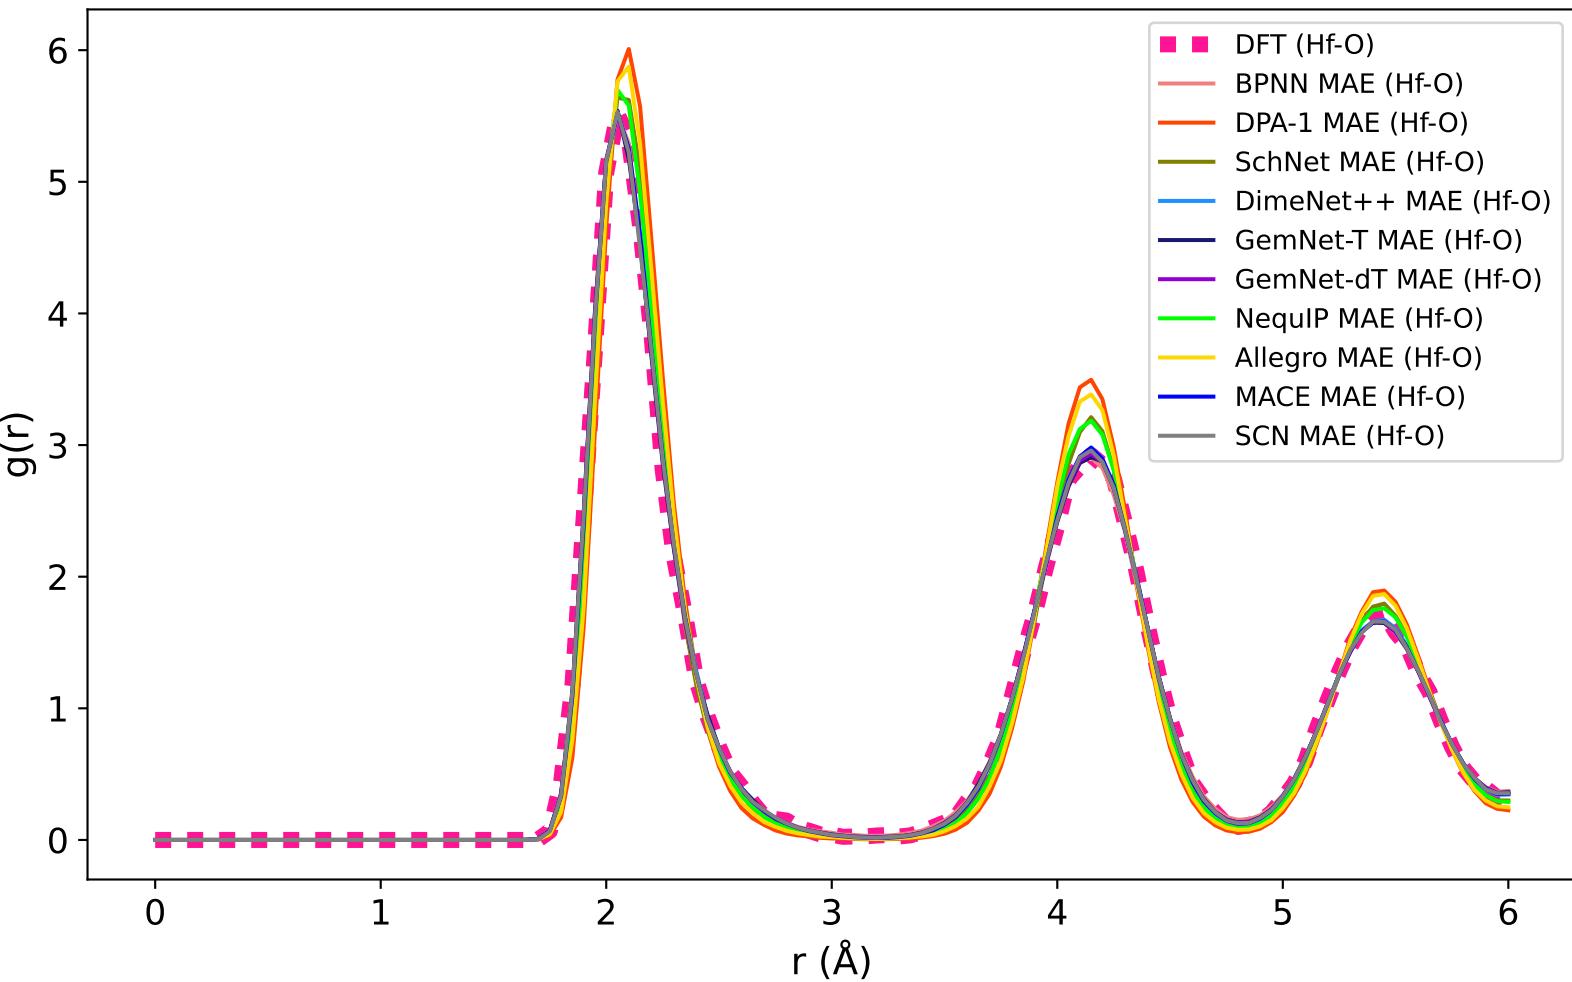

Supplement: supplementary_material [file attachment]

Orthorhombic (2), 1200K, (Hf-Hf)

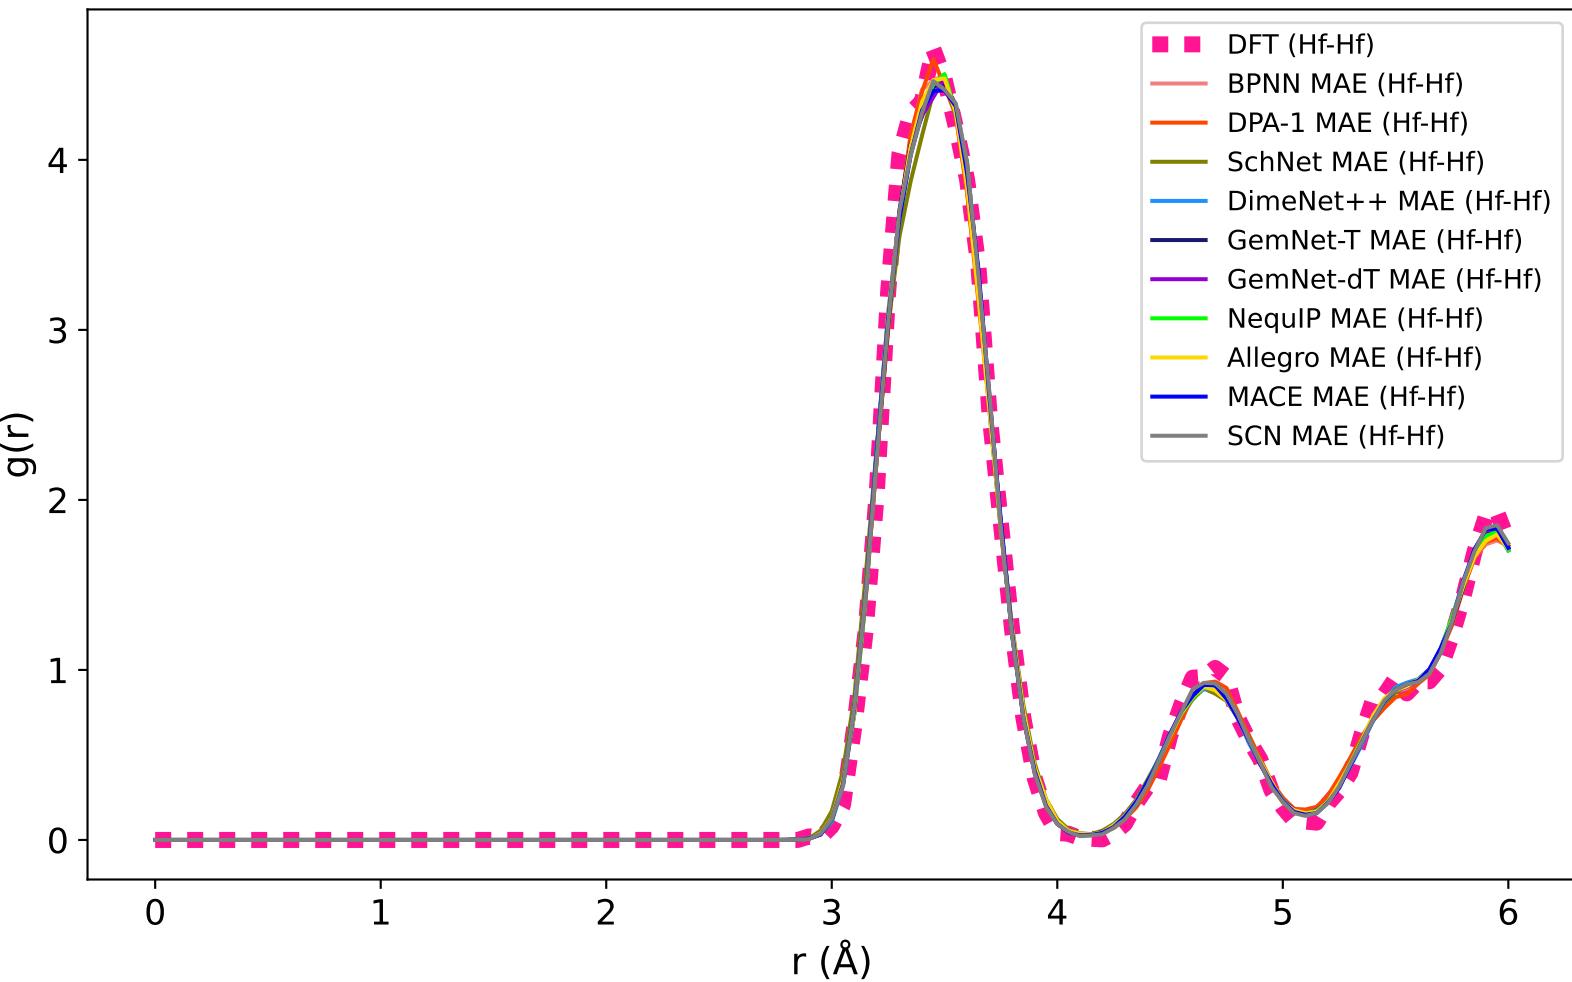

Supplement: supplementary_material [file attachment]

# Amorphous, 1200K, (Si-N)

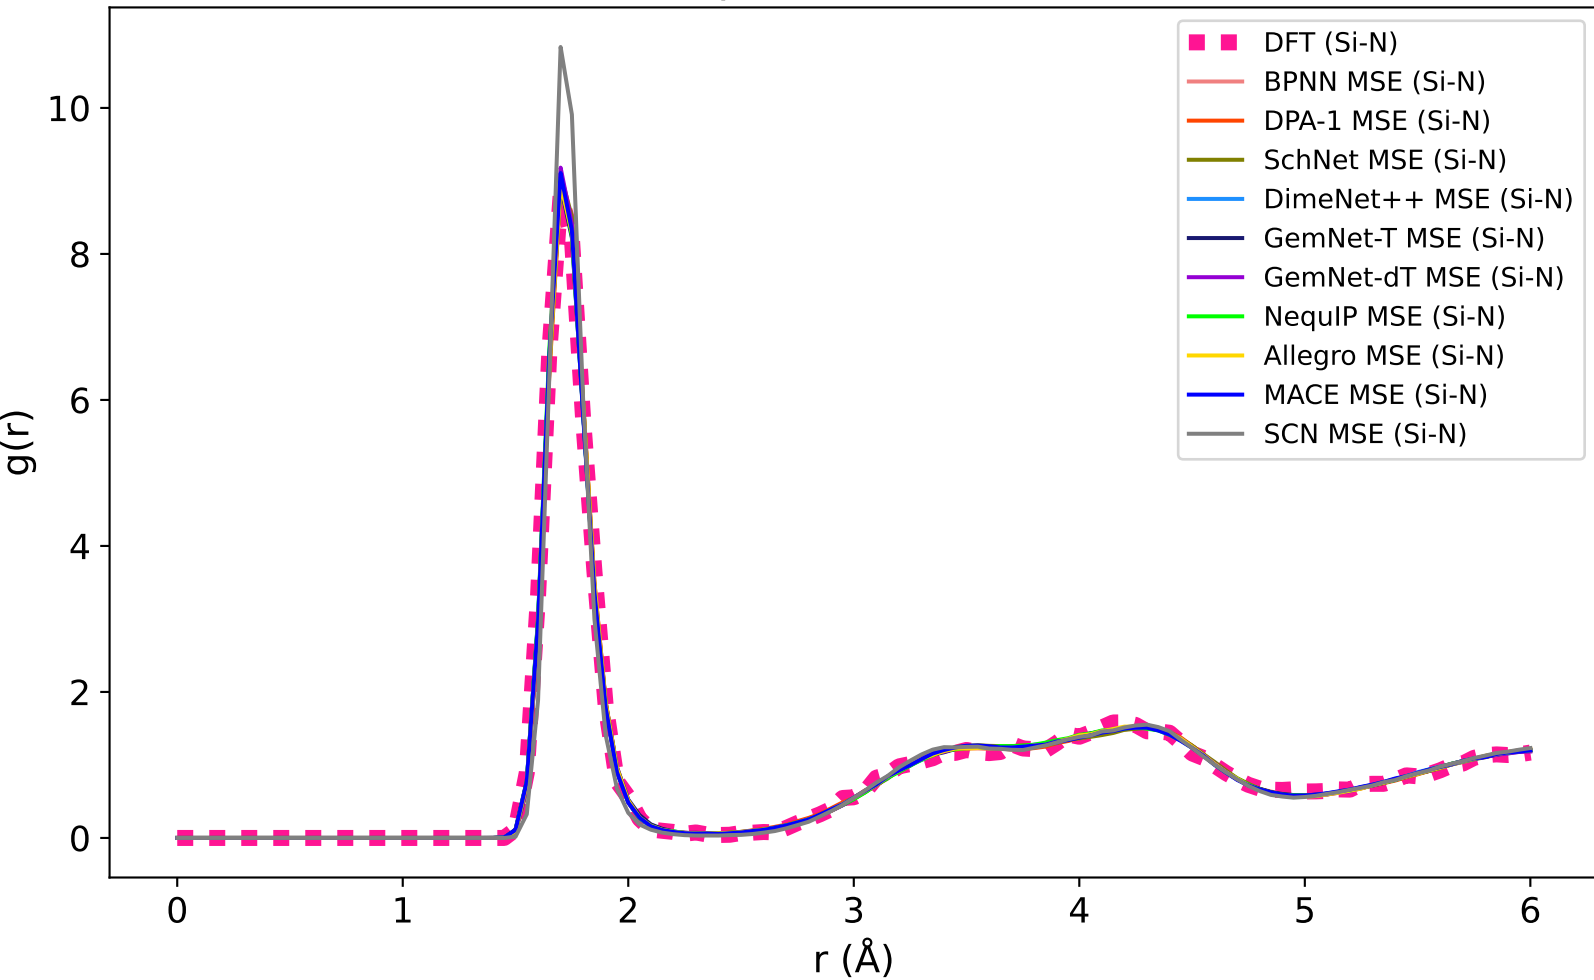

Supplement: supplementary_material [file attachment]

P4<sub>2</sub>/nmc, 96 atoms

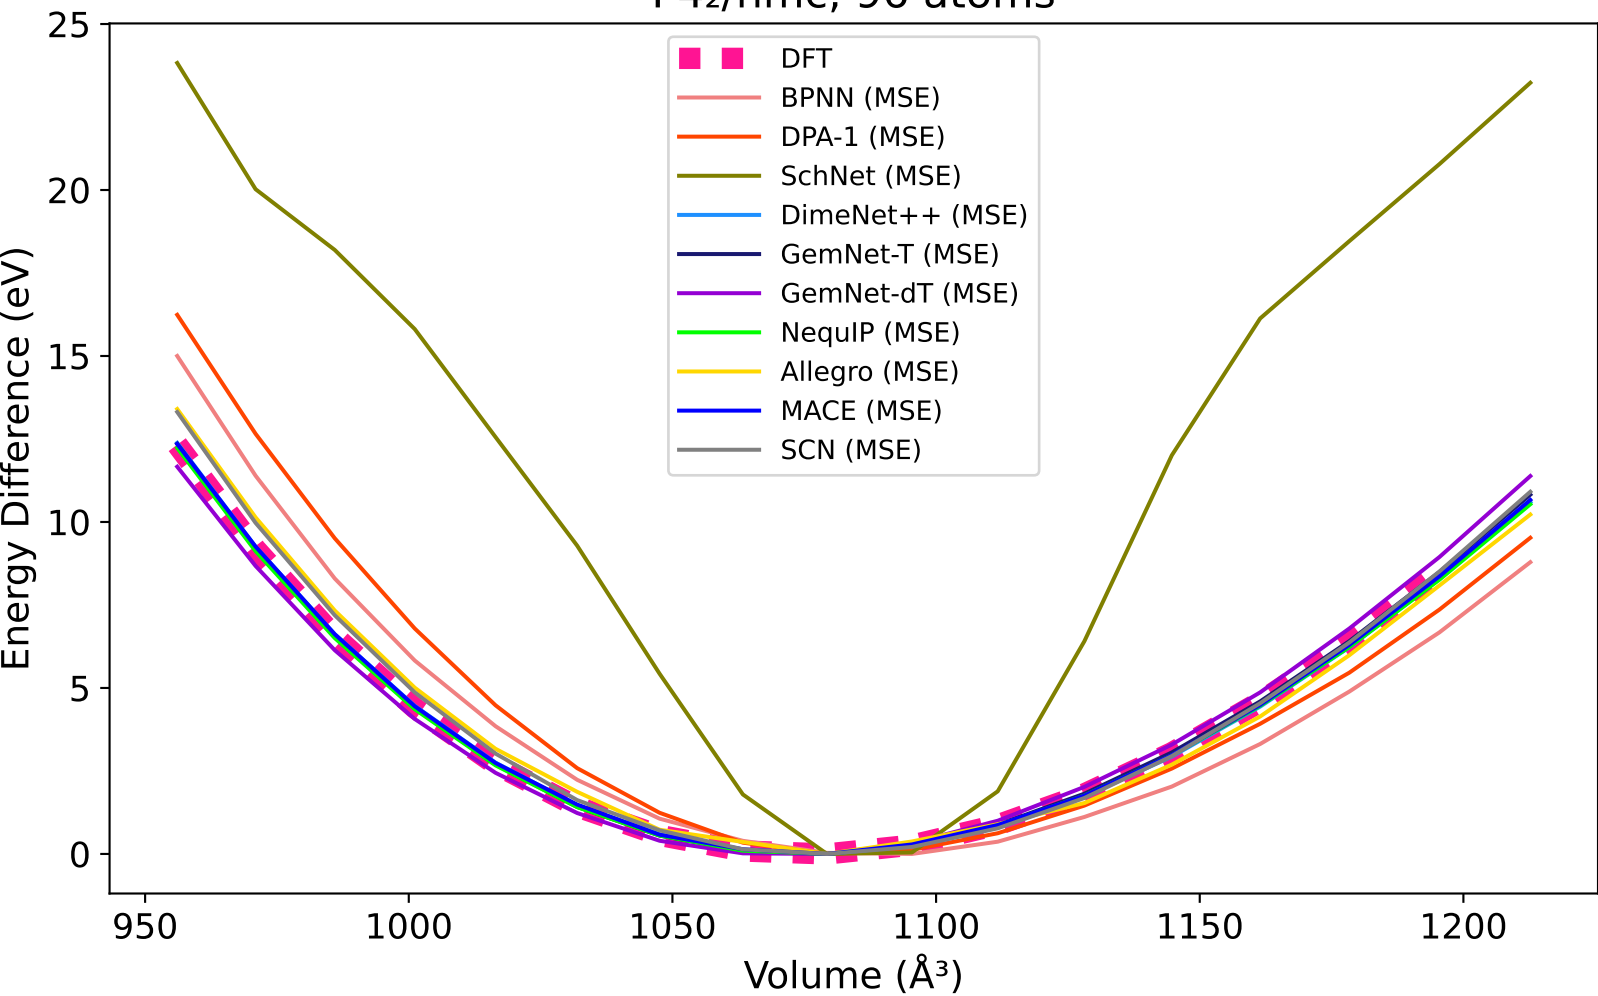

Supplement: supplementary_material [file attachment]

## Orthorhombic (1), 1200K, (O-O)

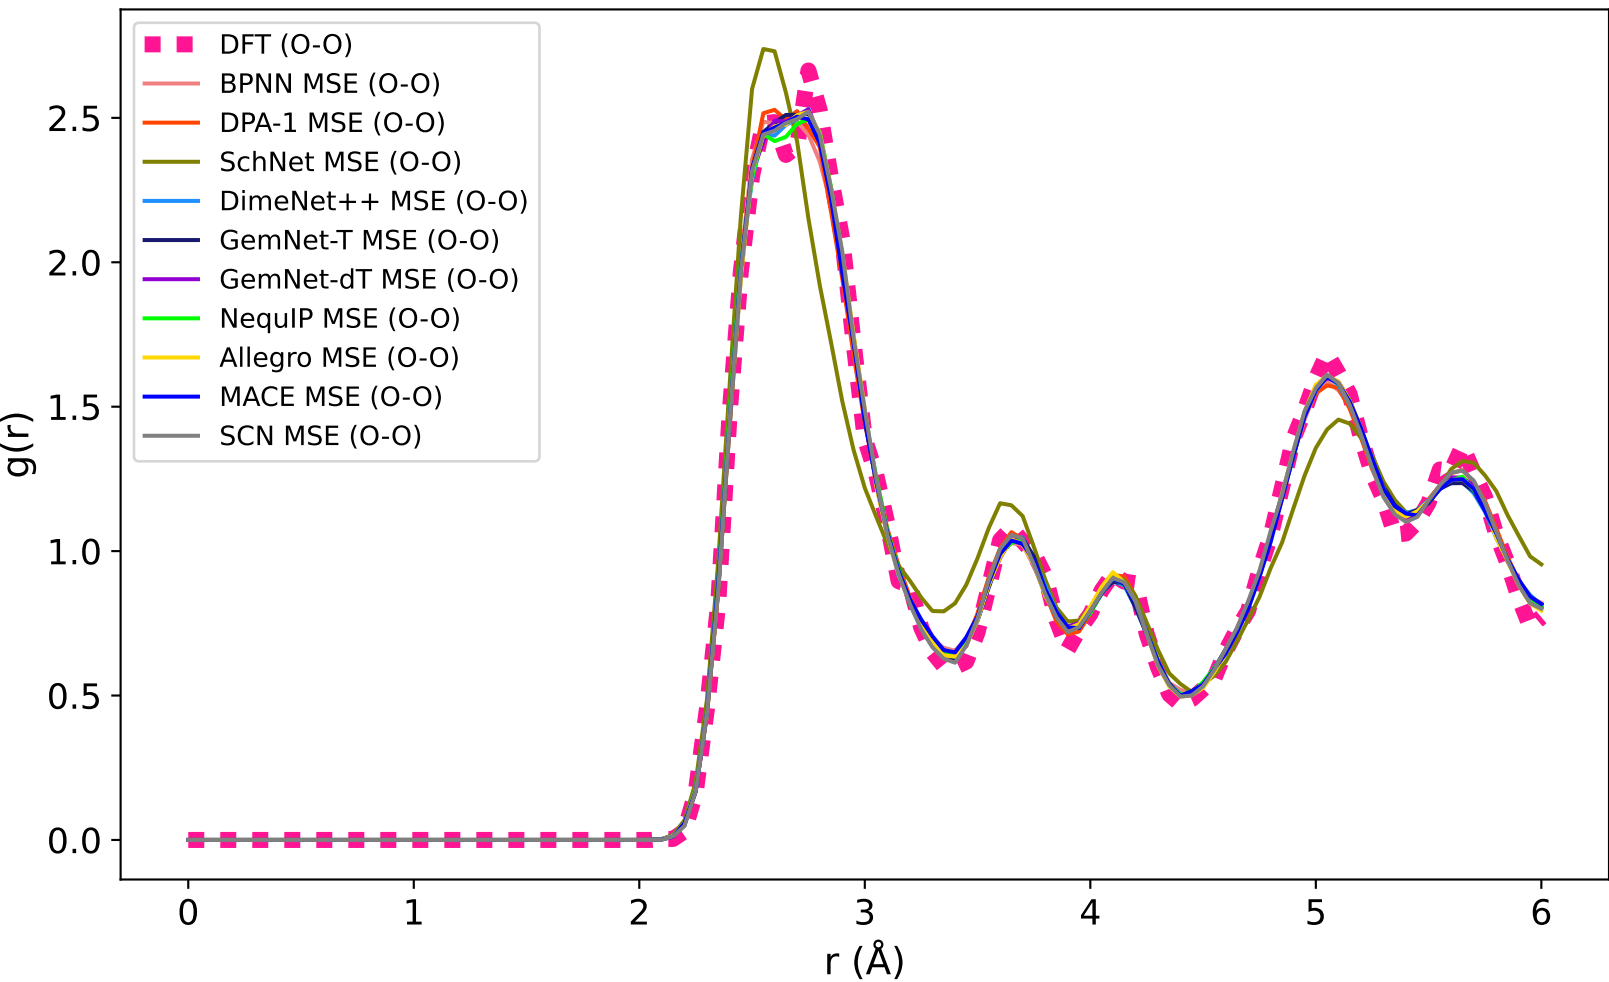

Supplement: supplementary_material [file attachment]

Orthorhombic (2), 1800K, (O-O)

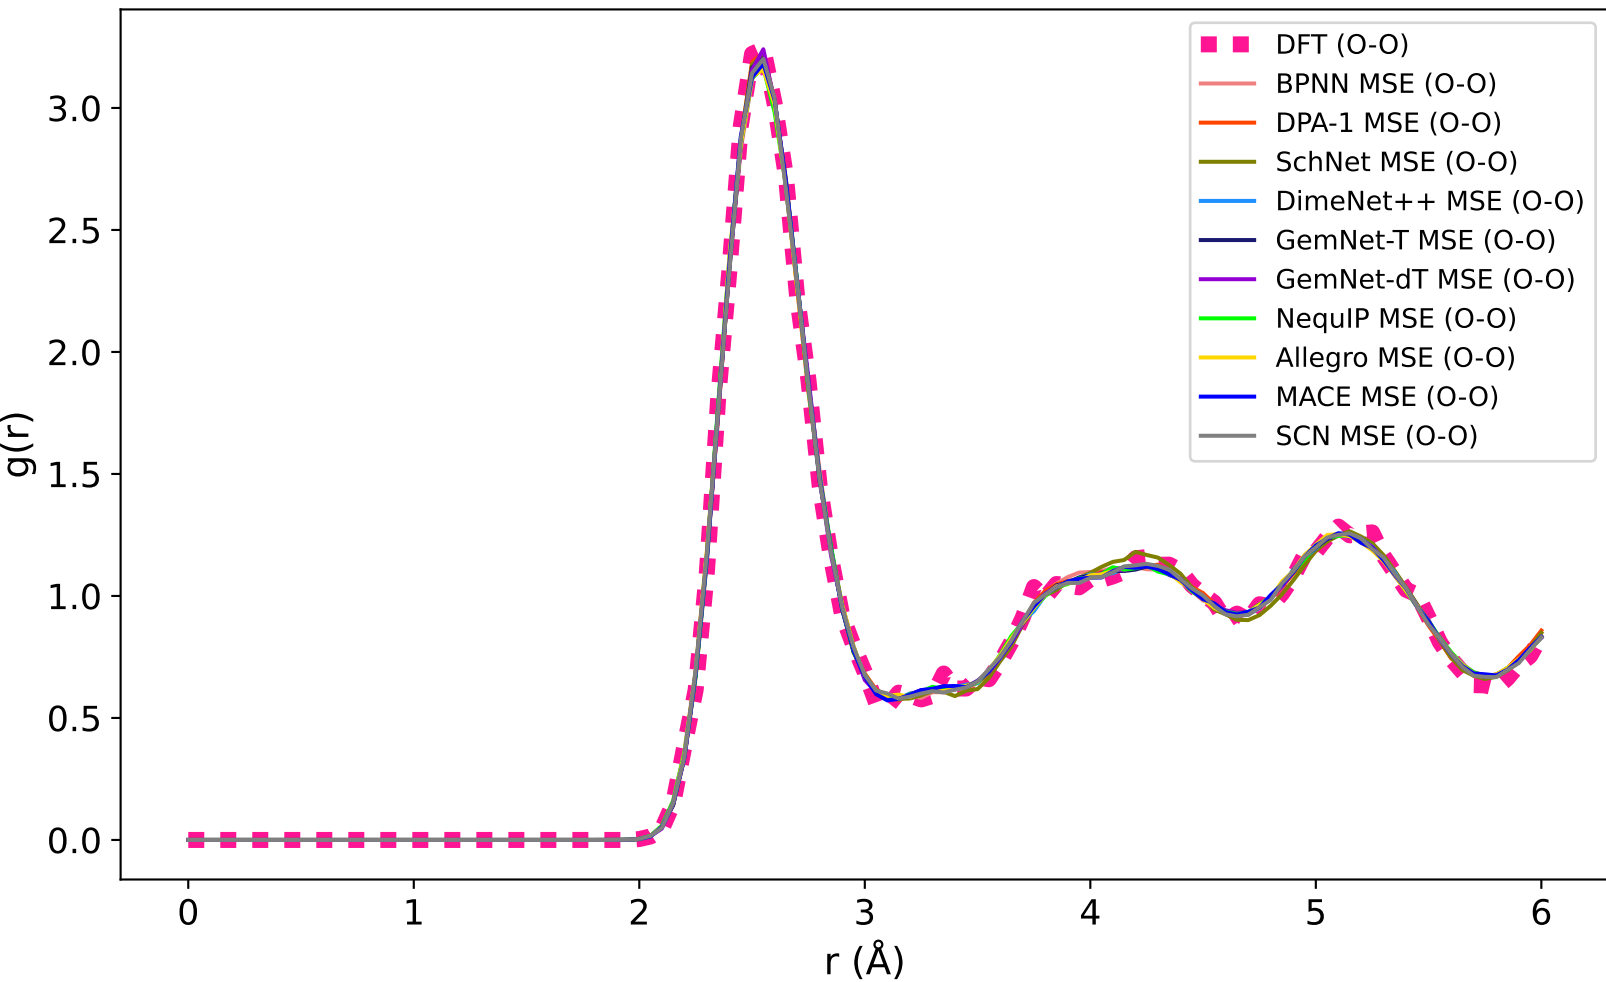

Supplement: supplementary_material [file attachment]

Cubic (1), 1200K, (Hf-Hf)

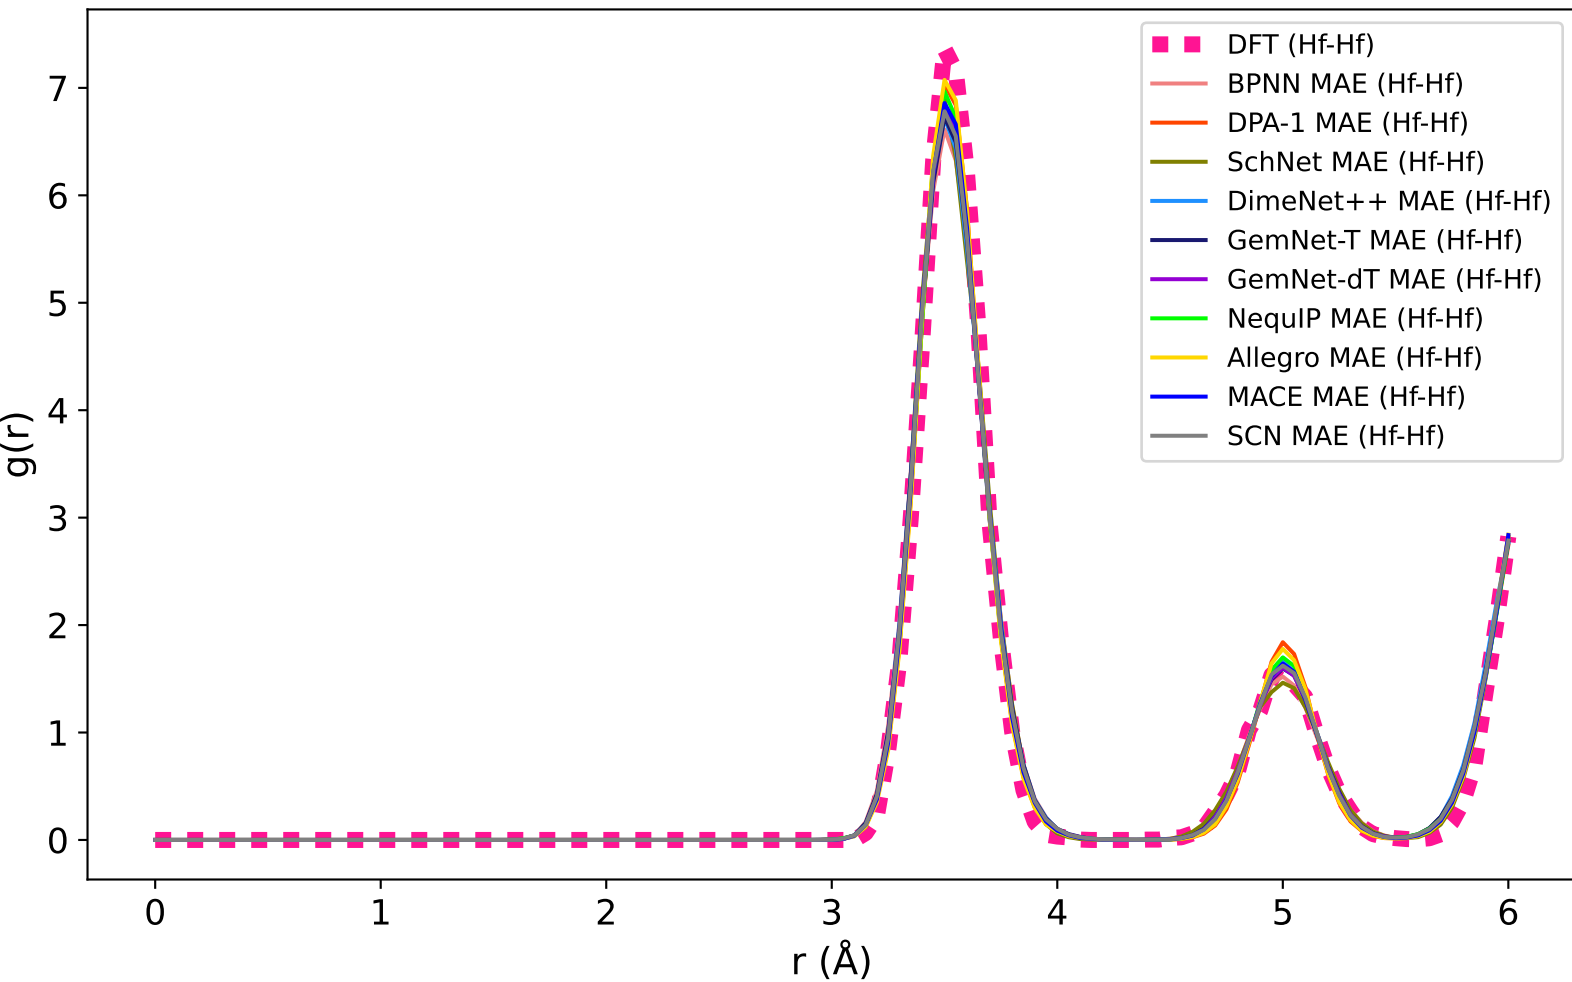

Supplement: supplementary_material [file attachment]

# Orthorhombic (2), 1800K, (O-O)

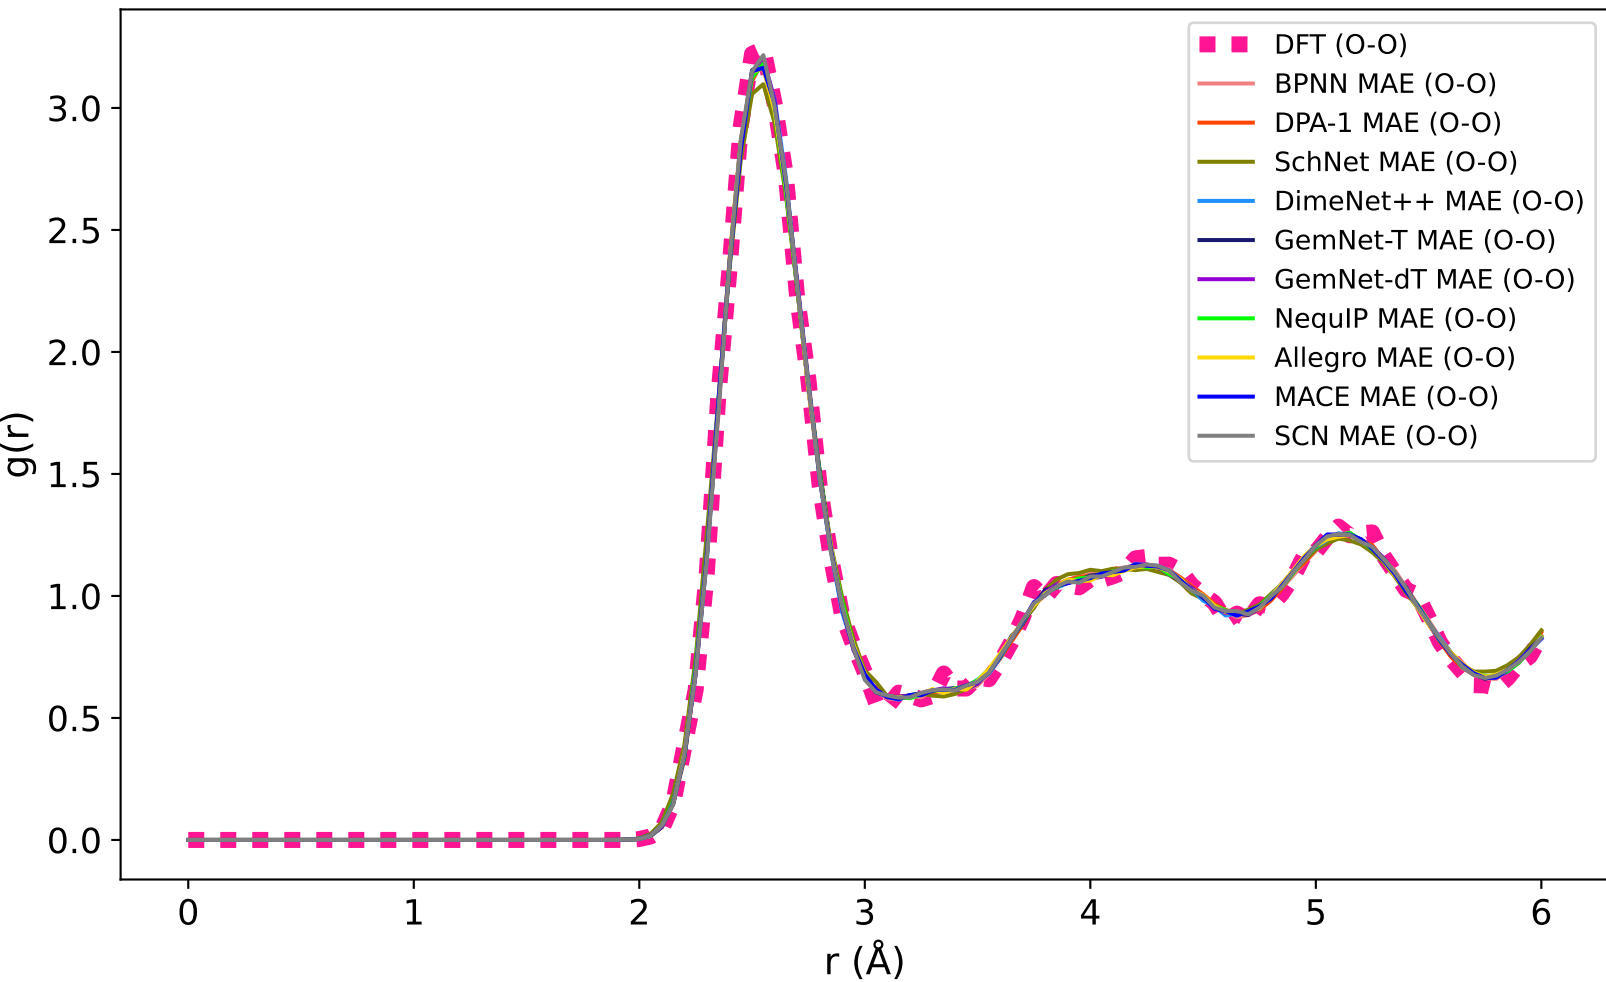

Supplement: supplementary_material [file attachment]

Triclinic, 1200K, (N-N)

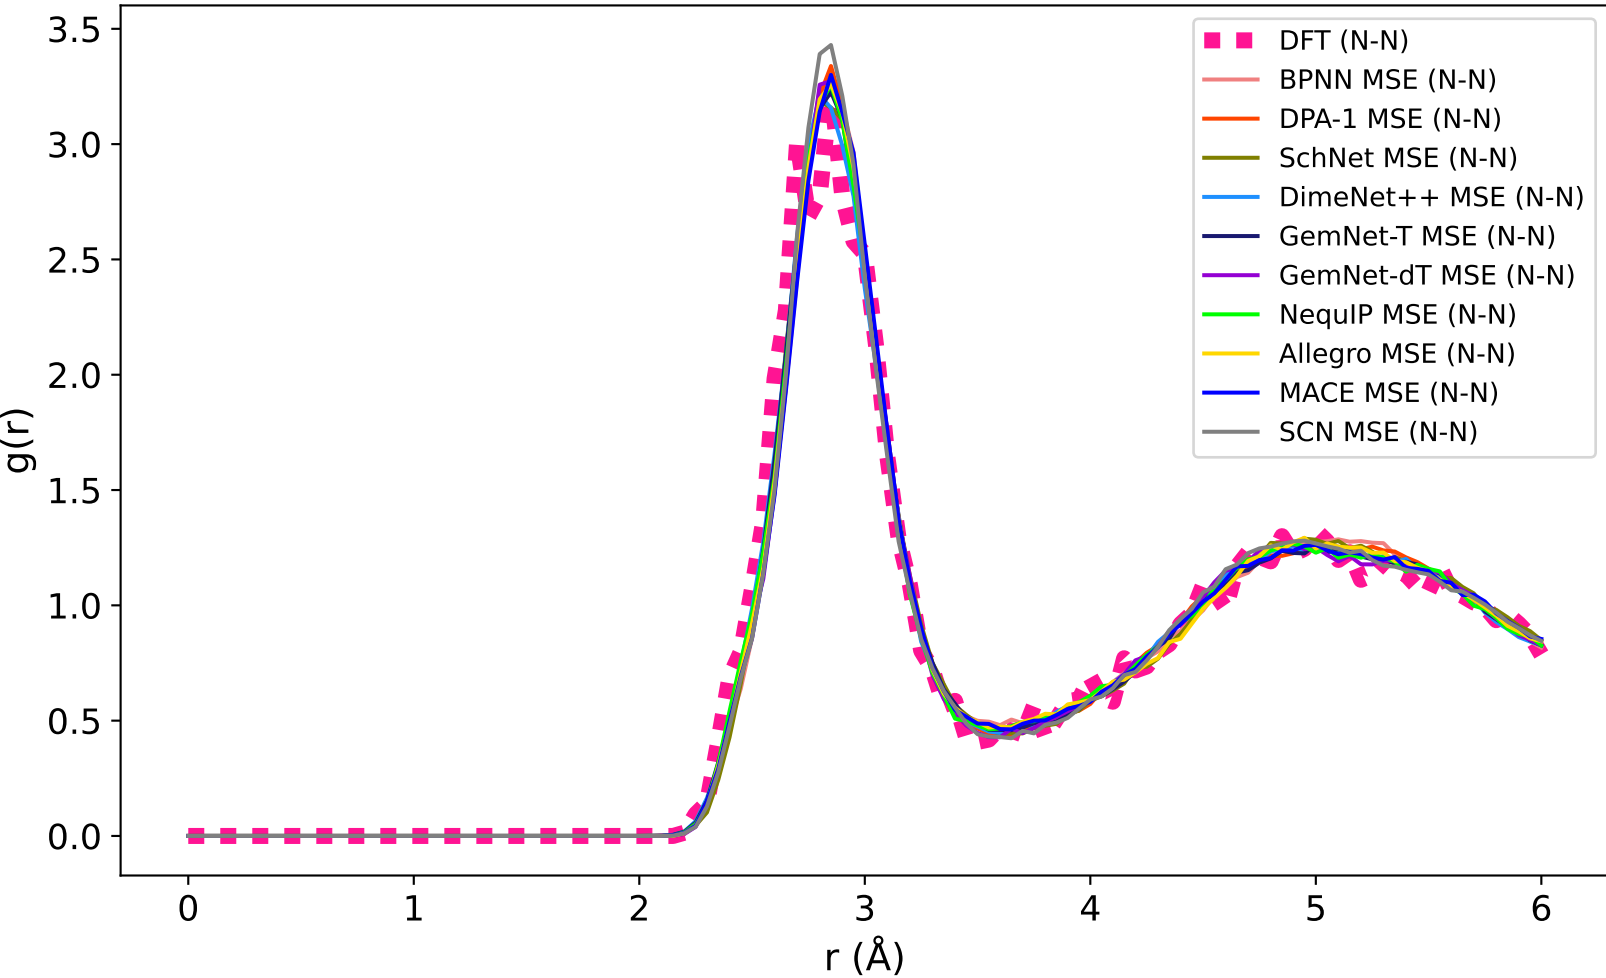

Supplement: supplementary_material [file attachment]

# P1, 28 atoms

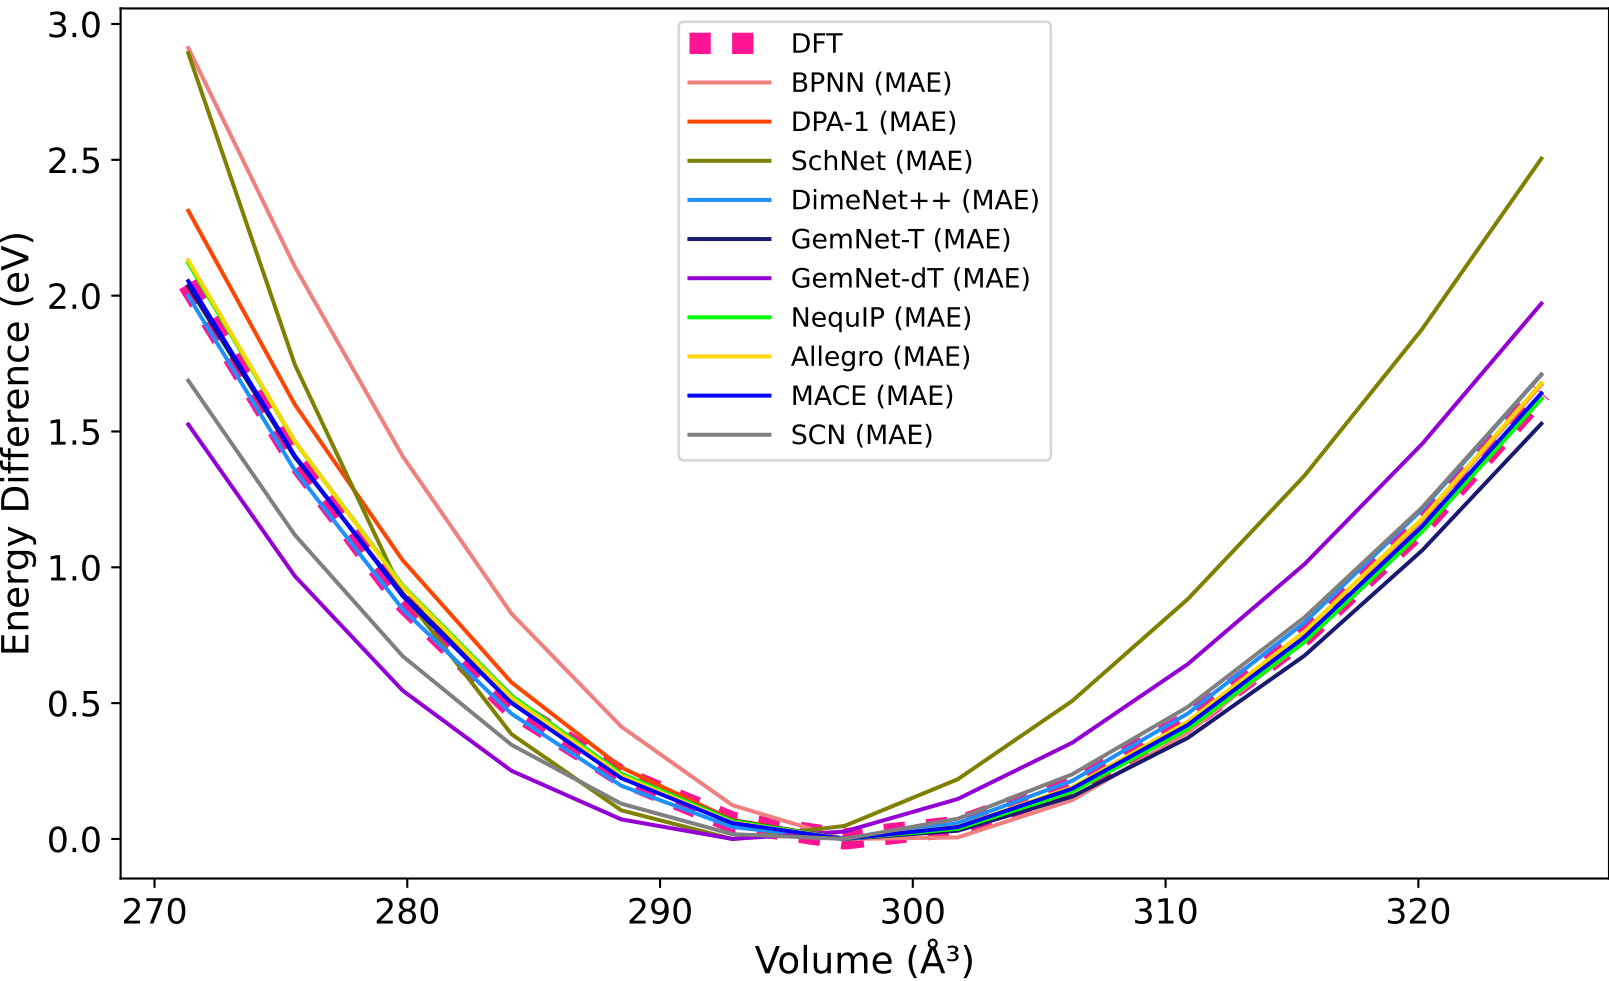

Supplement: supplementary_material [file attachment]

## Pnma, 96 atoms

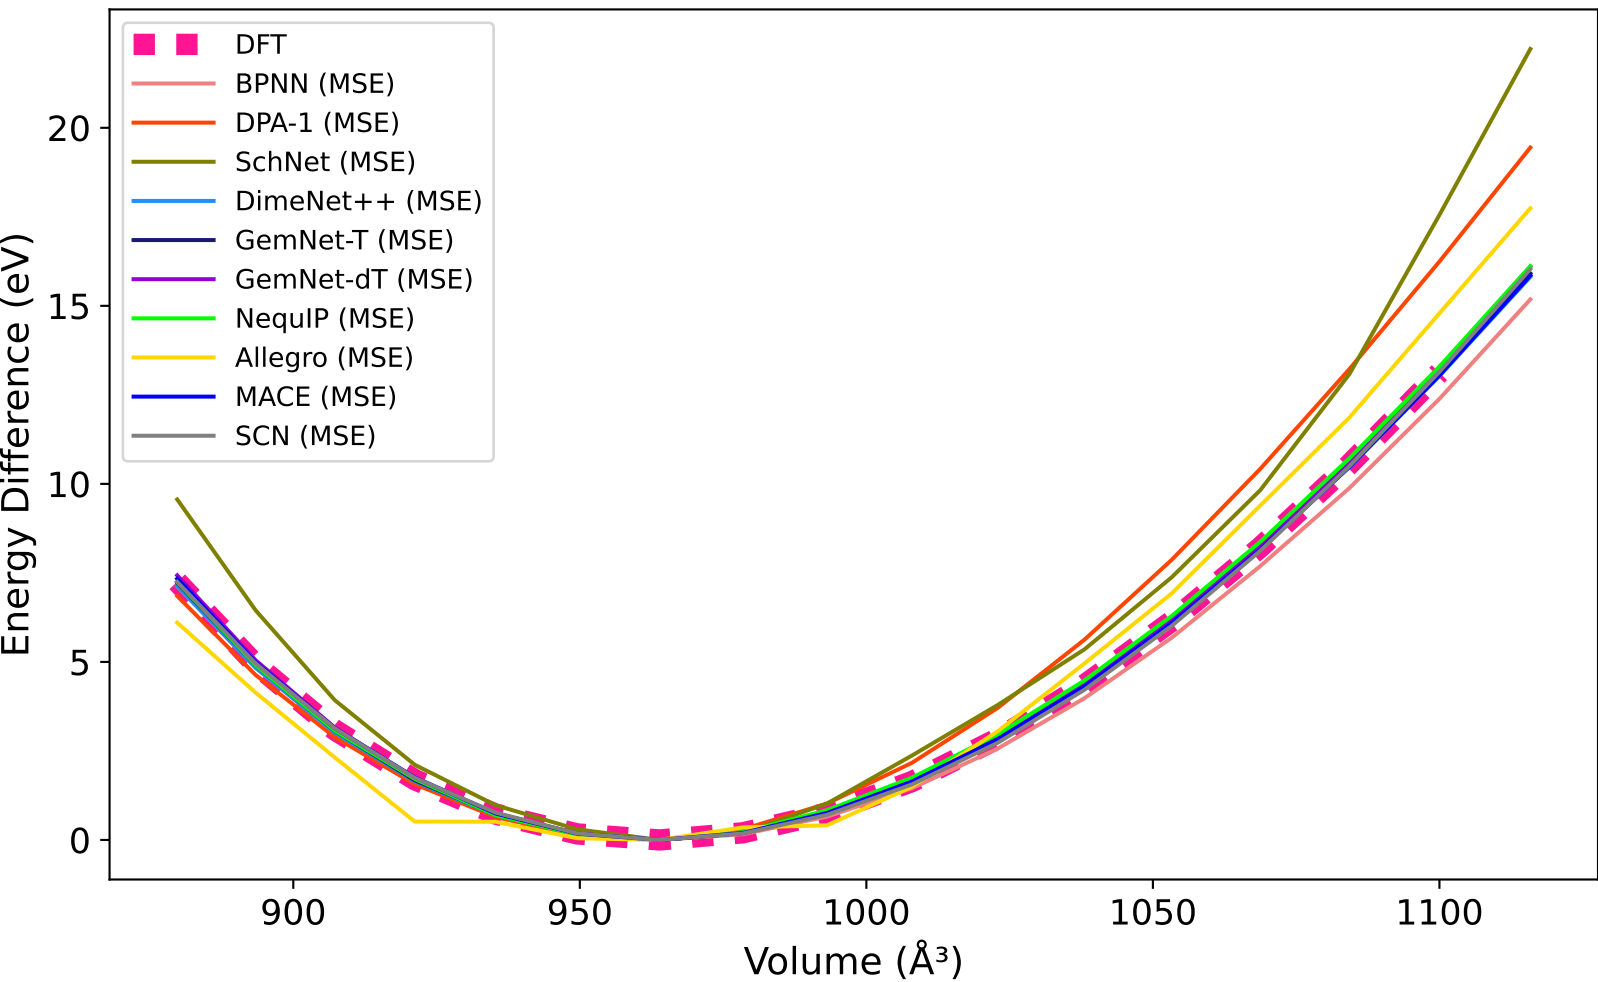

Supplement: supplementary_material [file attachment]

# Amorphous, 1200K, (N-N)

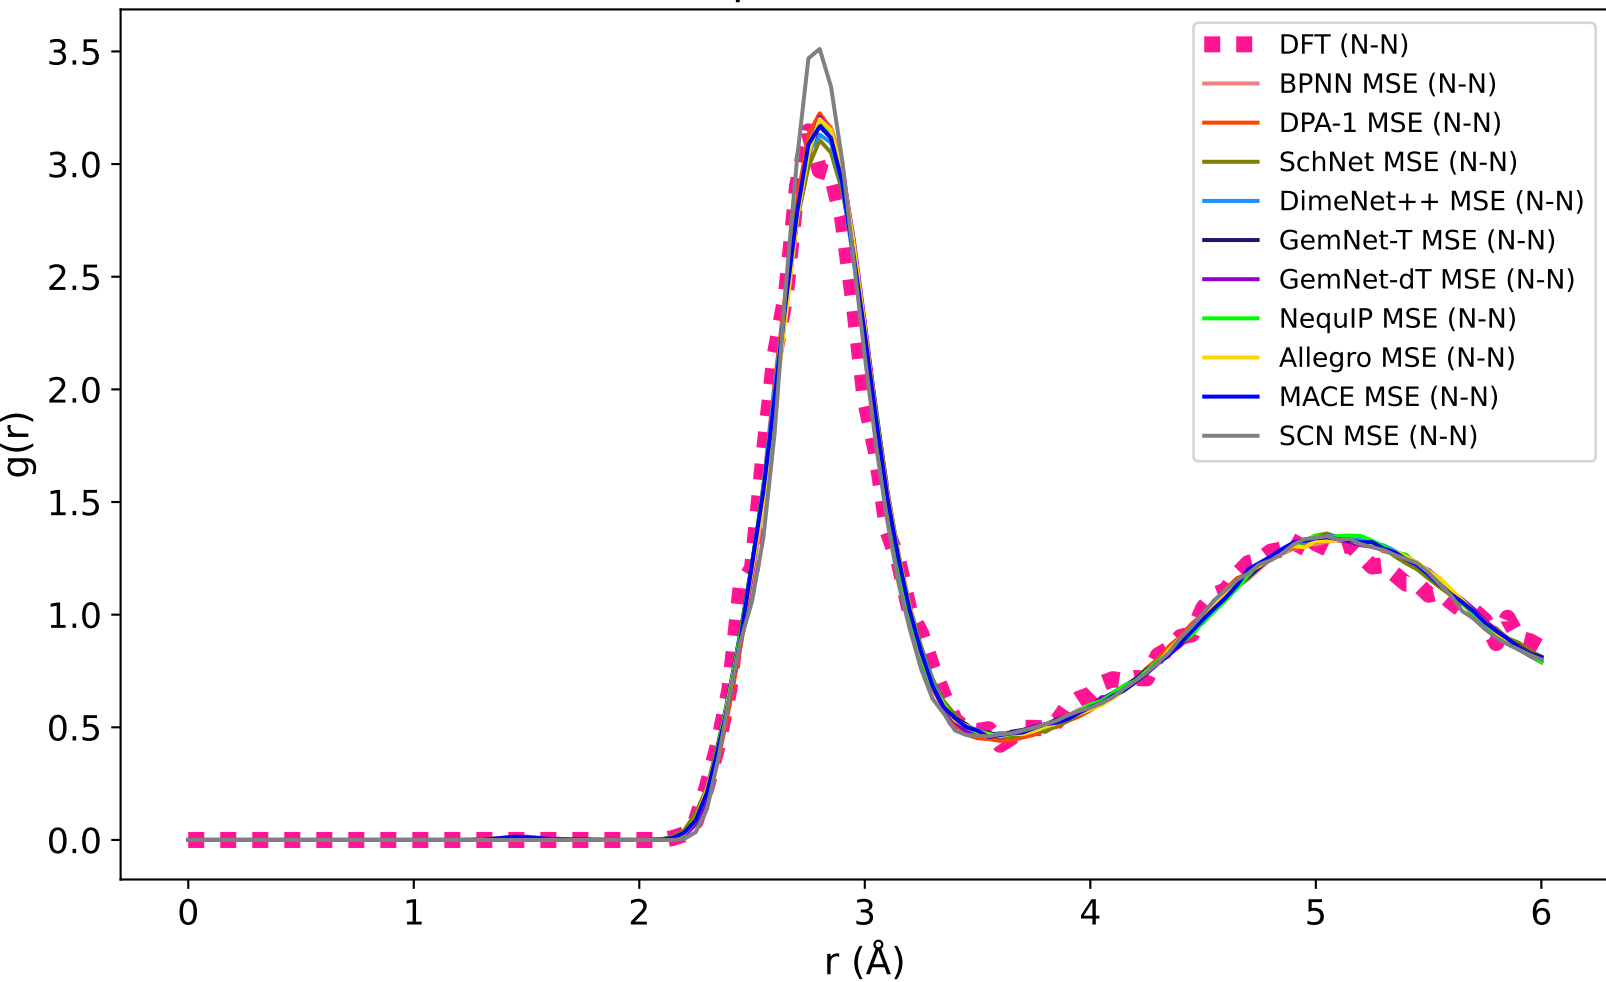

Supplement: supplementary_material [file attachment]

# Monoclinic, 1800K, (Hf-Hf)

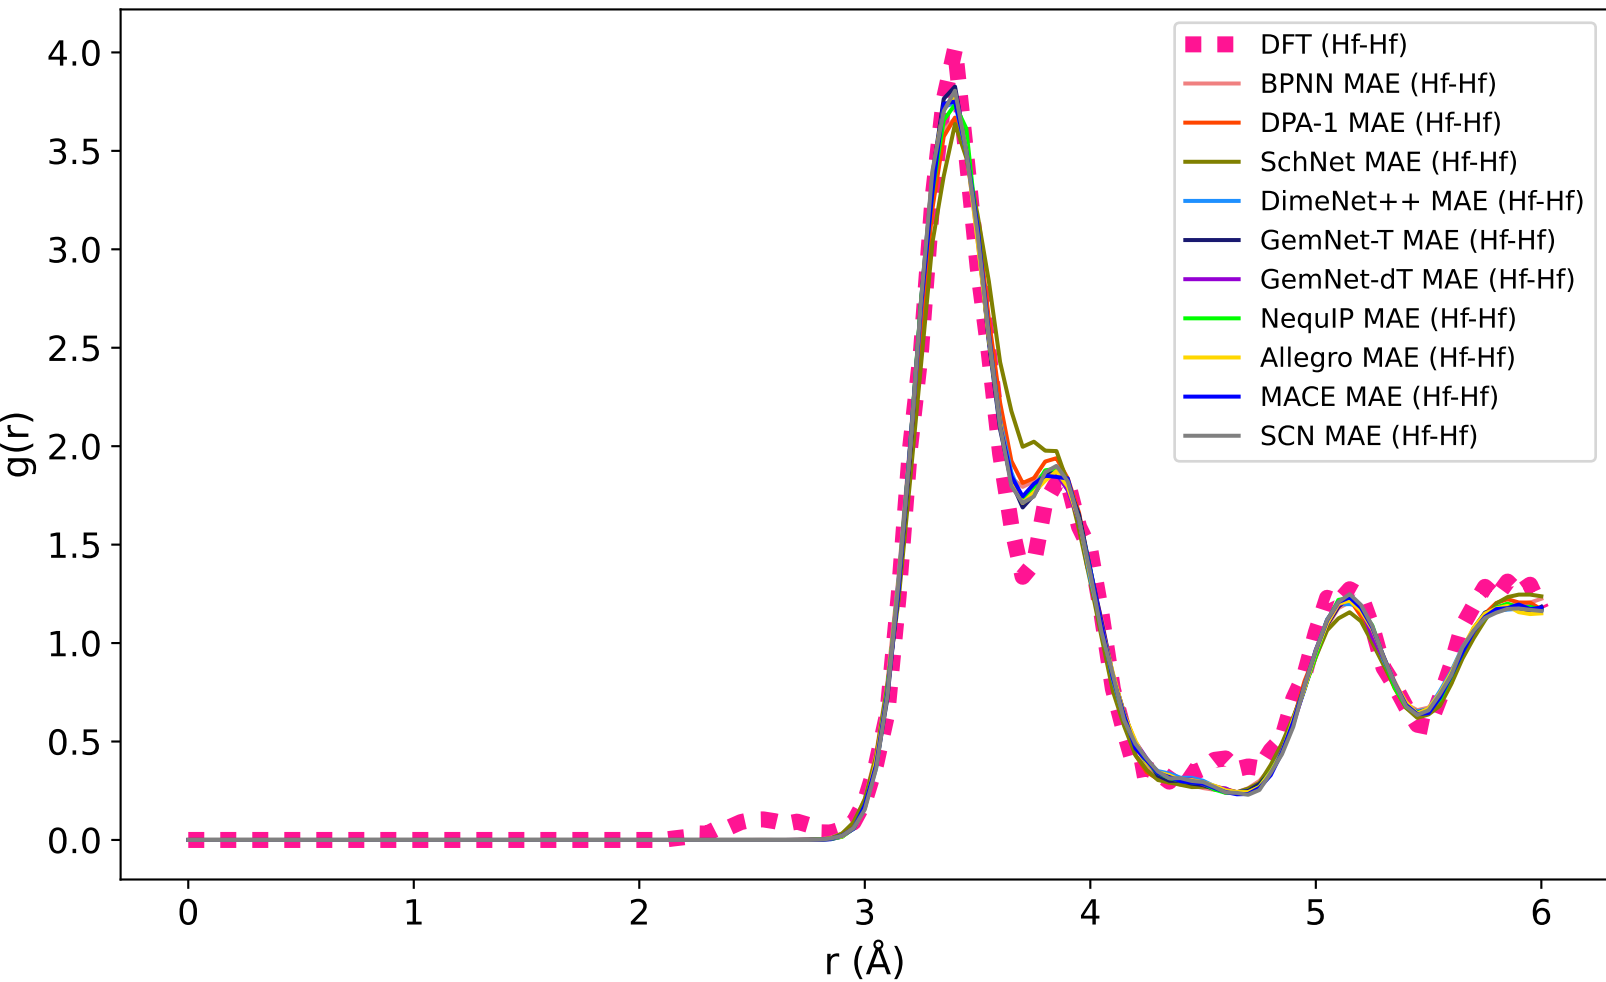

Supplement: supplementary_material [file attachment]

Cubic (1), 1200K, (Hf-O)

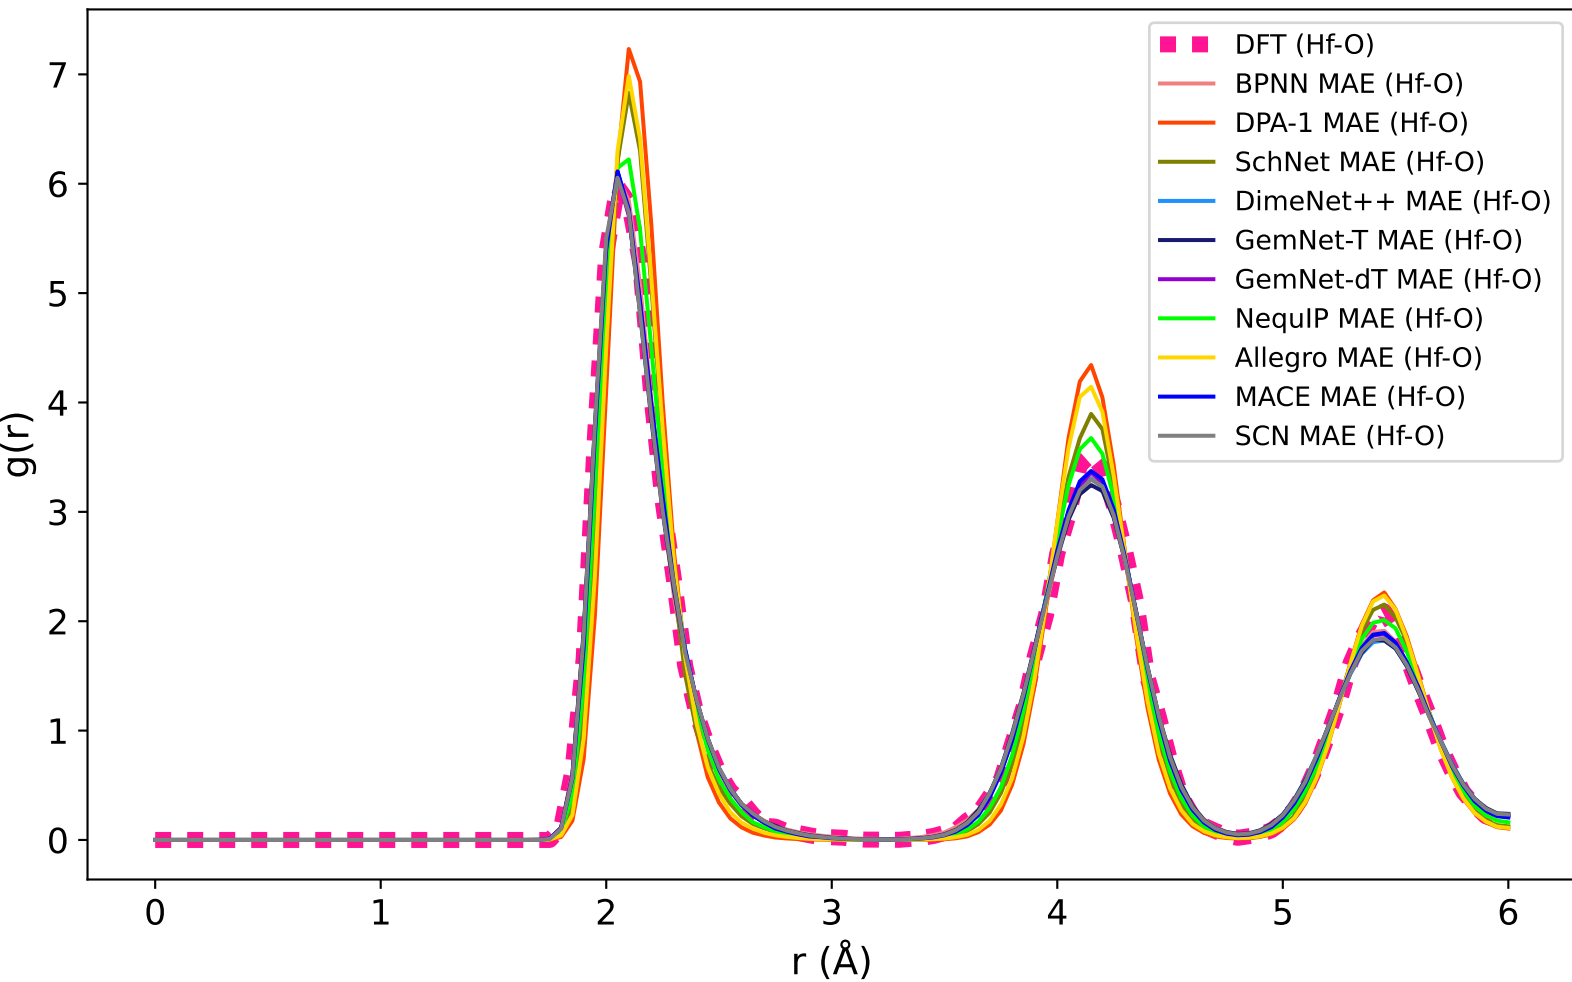

Supplement: supplementary_material [file attachment]

# Tetragonal, 1200K, (Hf-O)

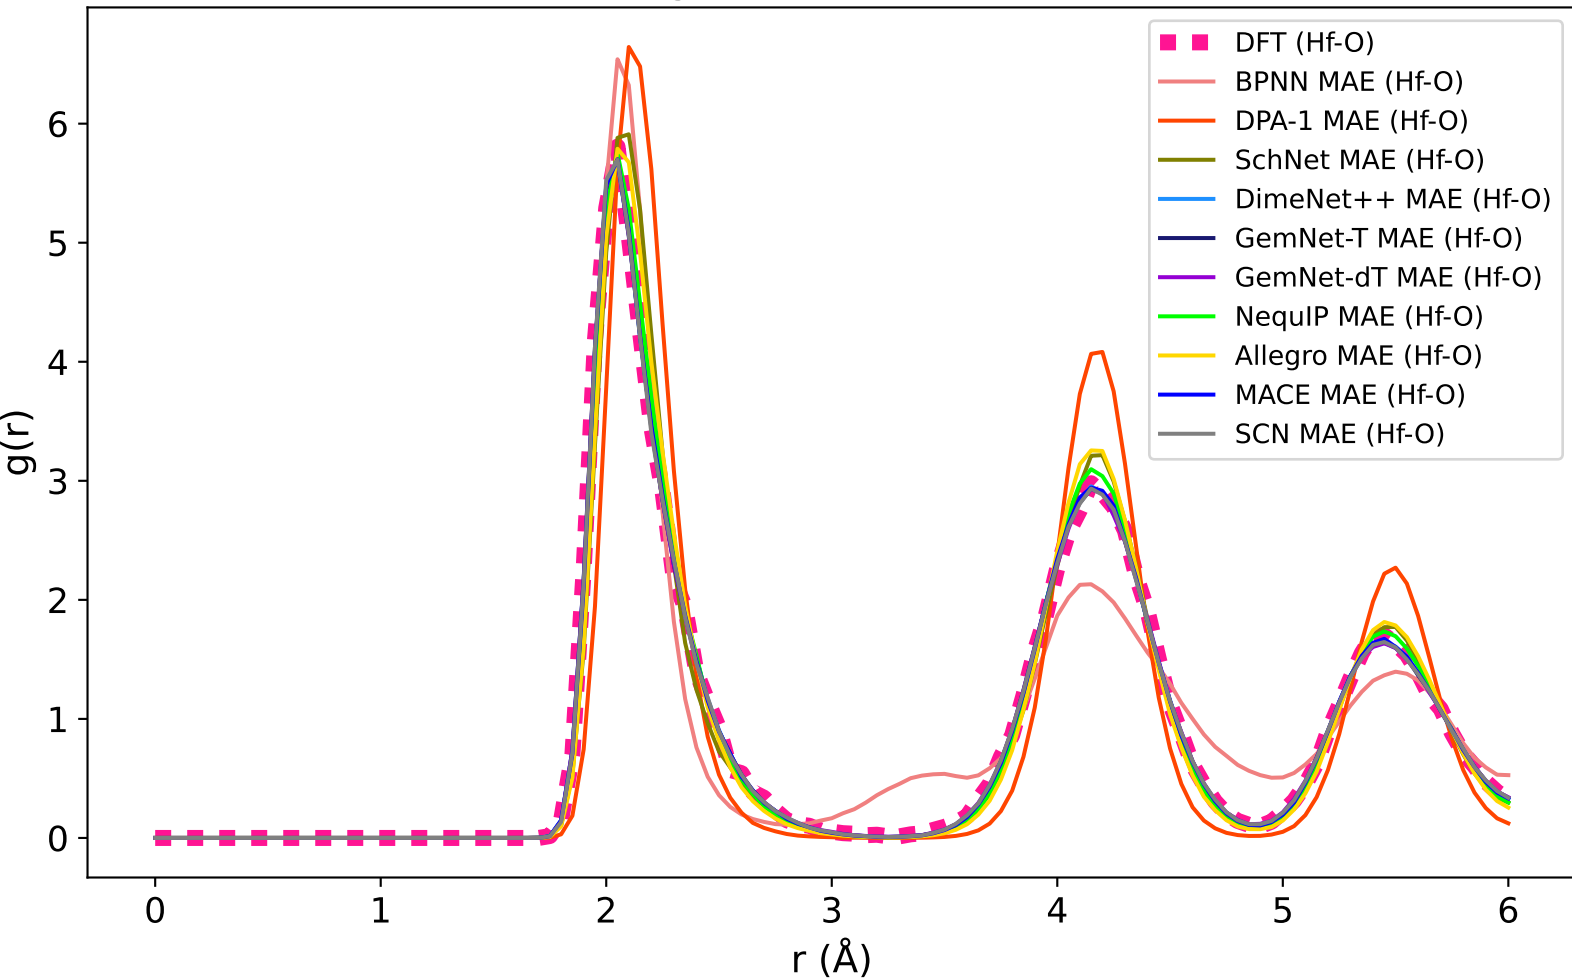

Supplement: supplementary_material [file attachment]

Orthorhombic (2), 1800K, (Hf-Hf)

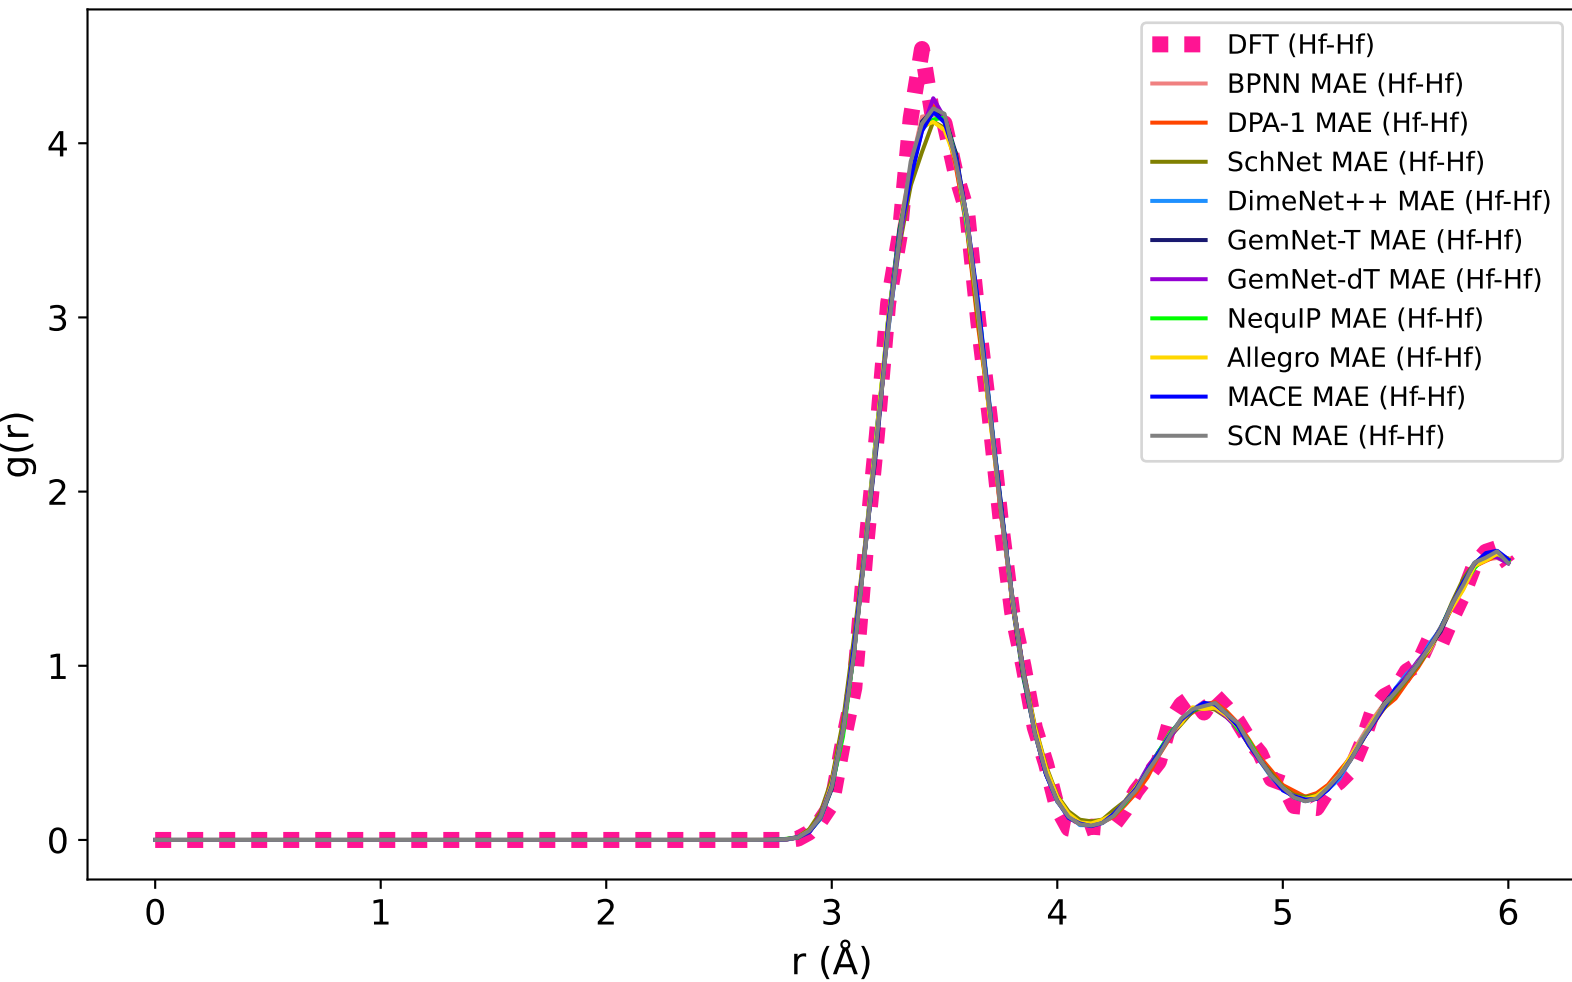

Supplement: supplementary_material [file attachment]

# Fd3m, 56 atoms

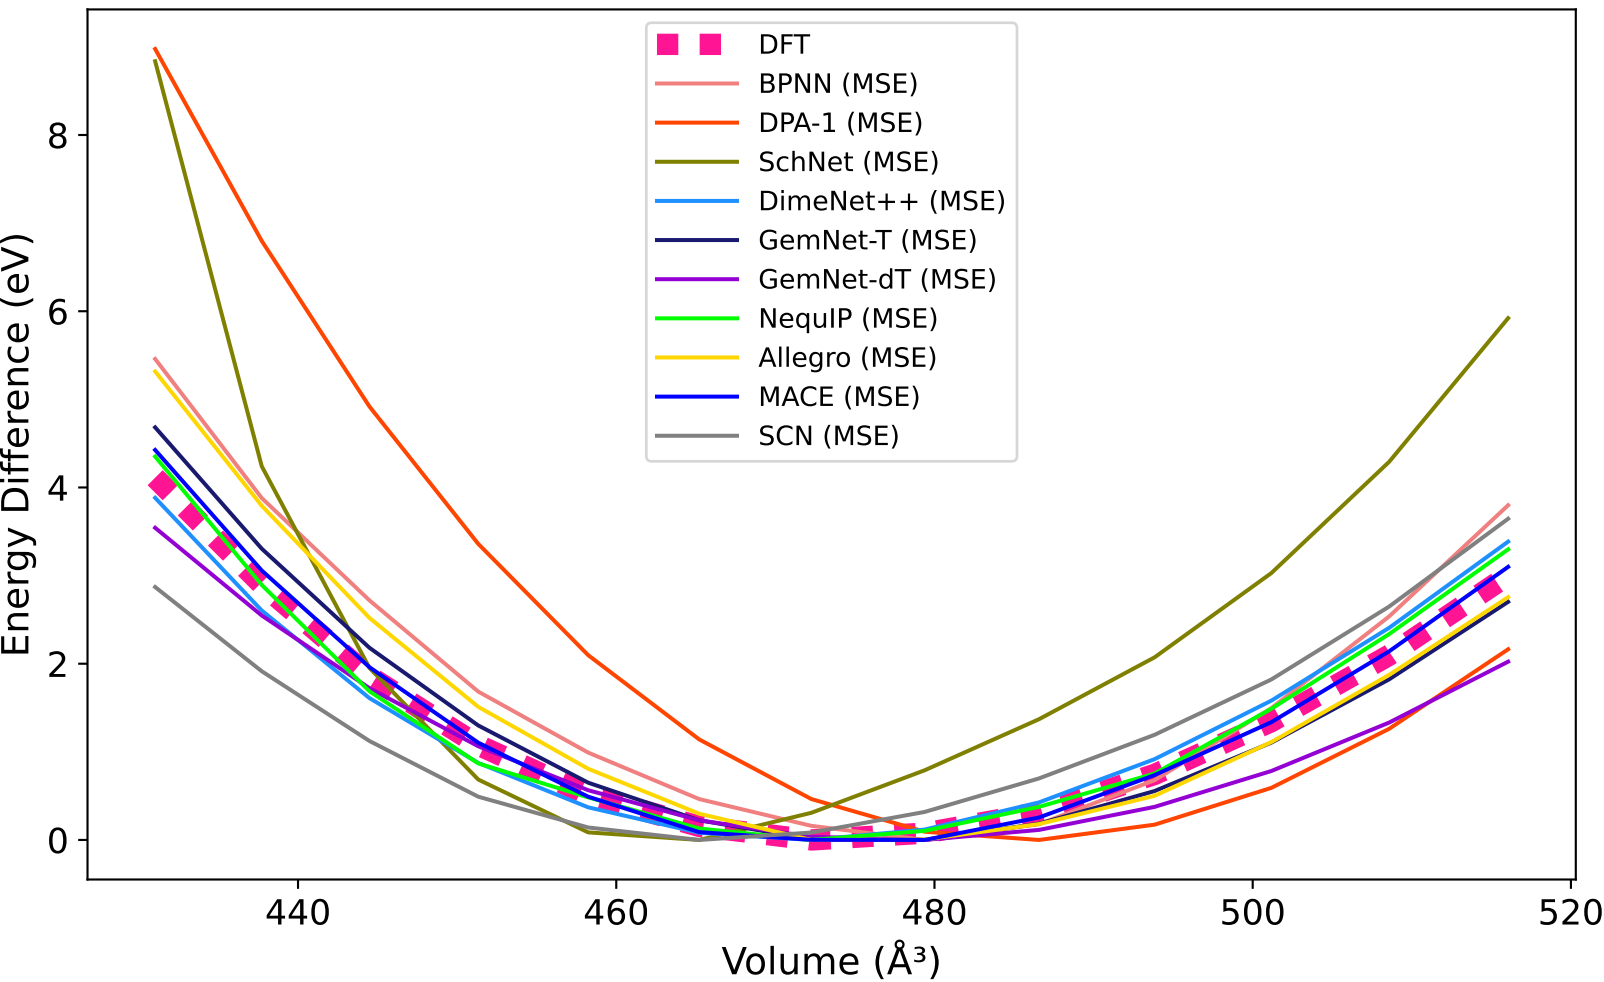

Supplement: supplementary_material [file attachment]

# Pnma, 96 atoms

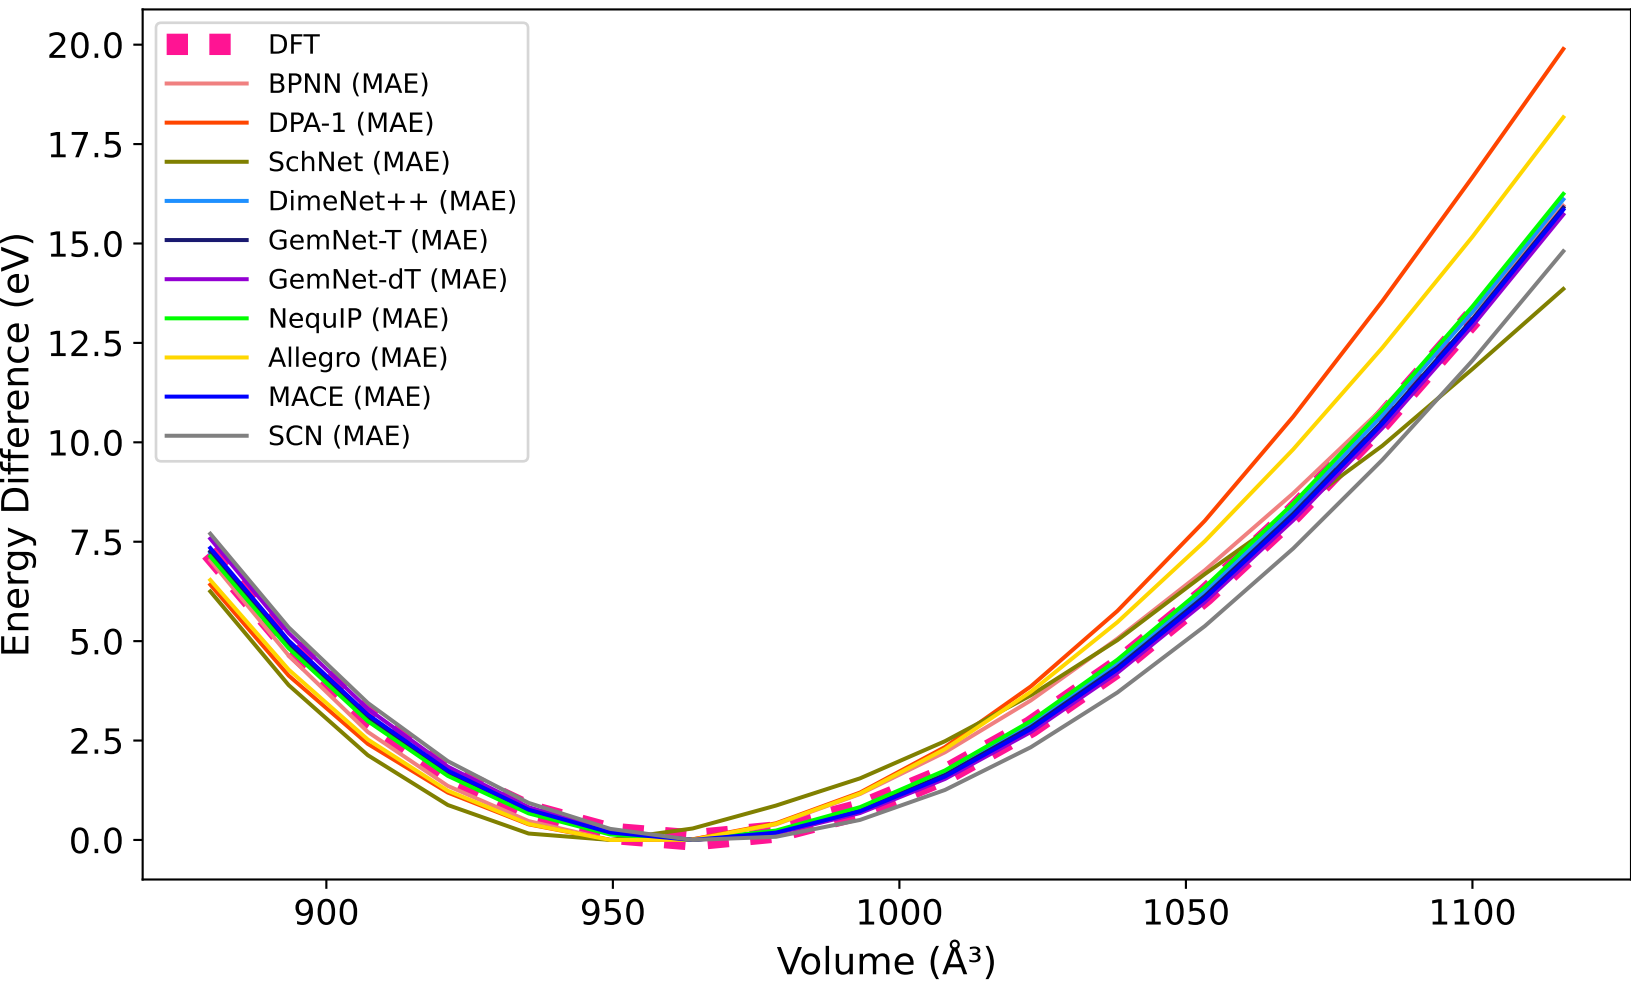

Supplement: supplementary_material [file attachment]

Cubic (2), 1200K, (N-N)

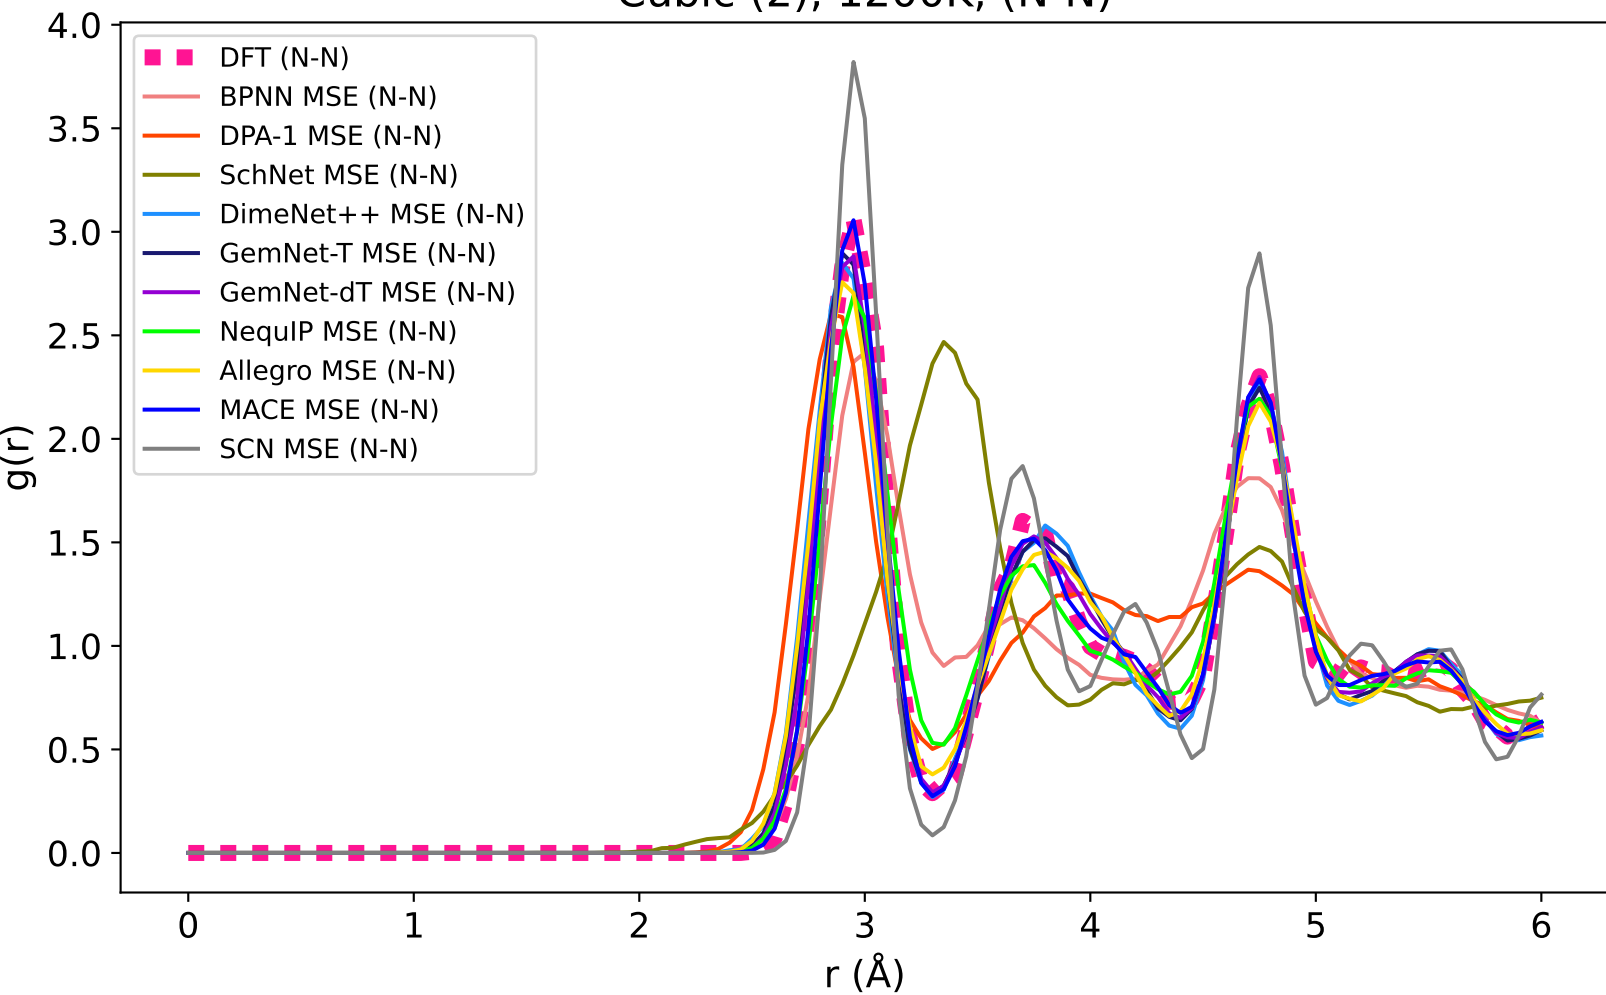

Supplement: supplementary_material [file attachment]

Hexagonal (1), 1200K, (O-O)

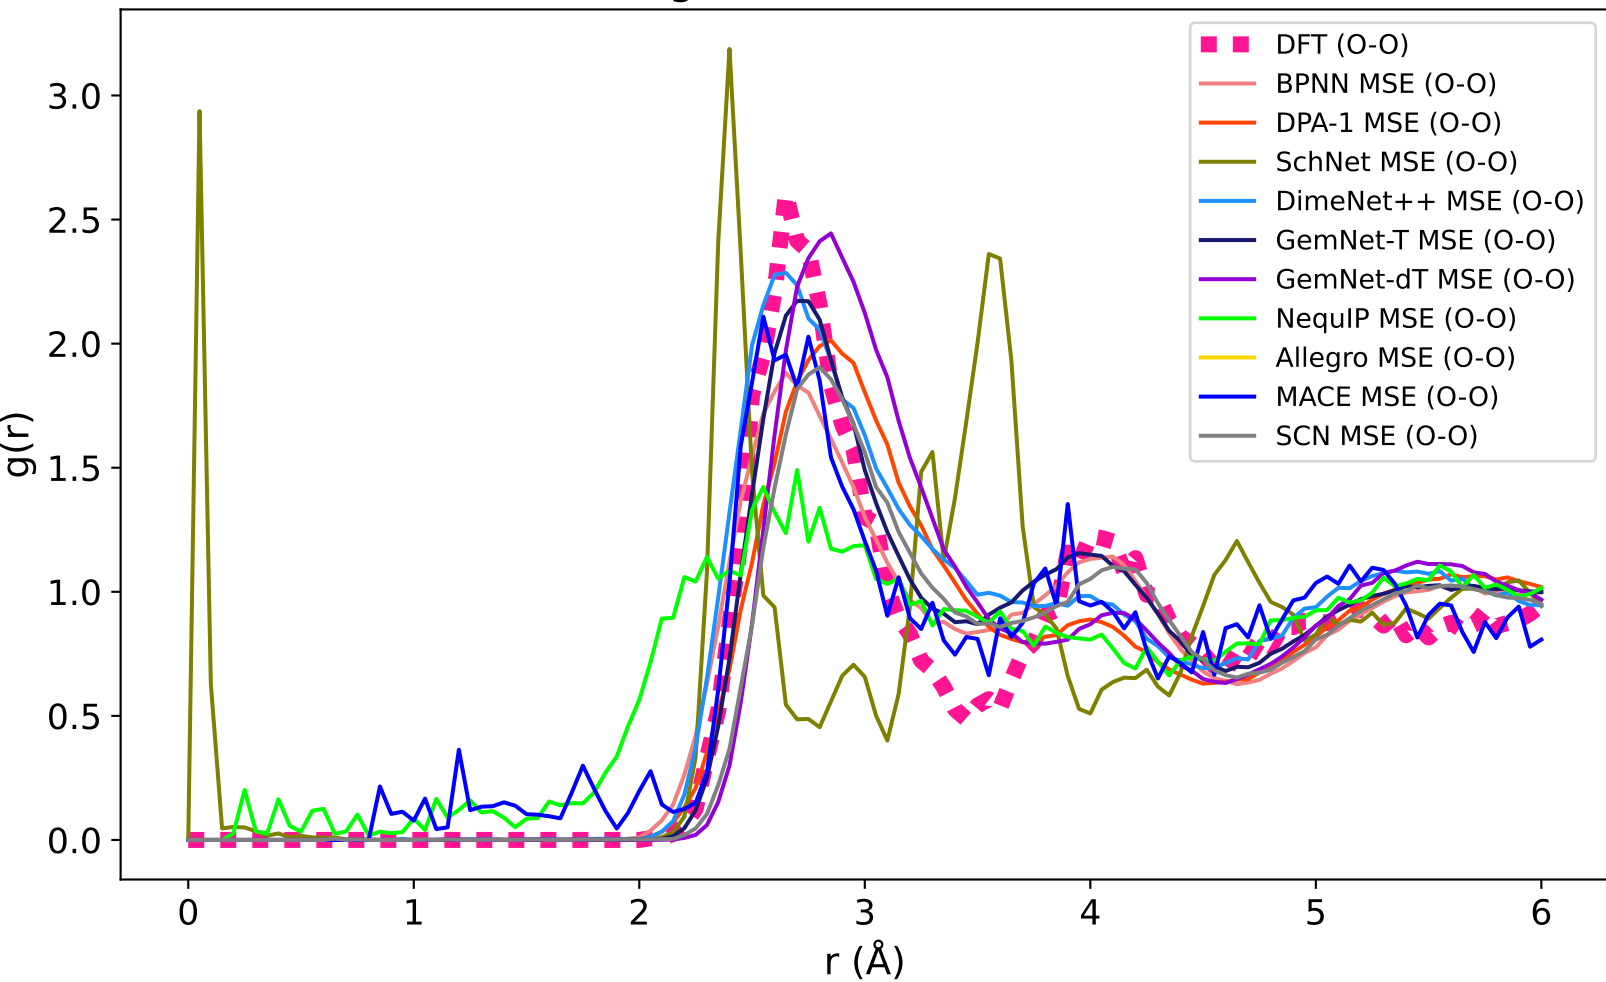

Supplement: supplementary_material [file attachment]

Tetragonal, 1800K, (Hf-O)

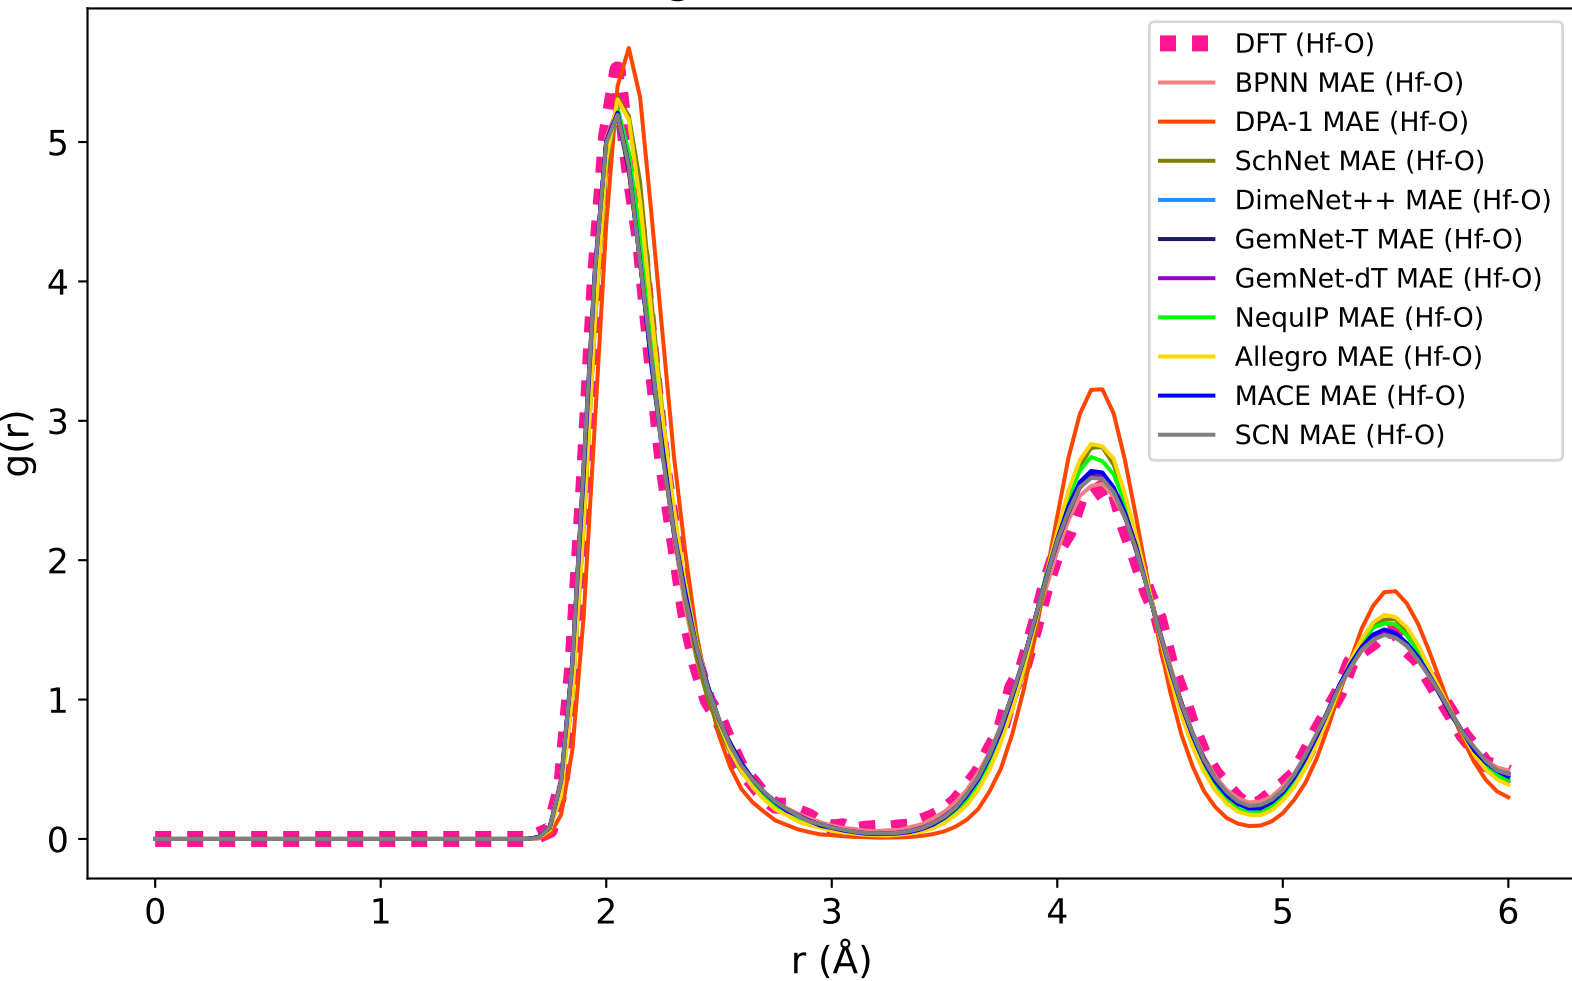

Supplement: supplementary_material [file attachment]

# Monoclinic, 1200K, (Hf-O)

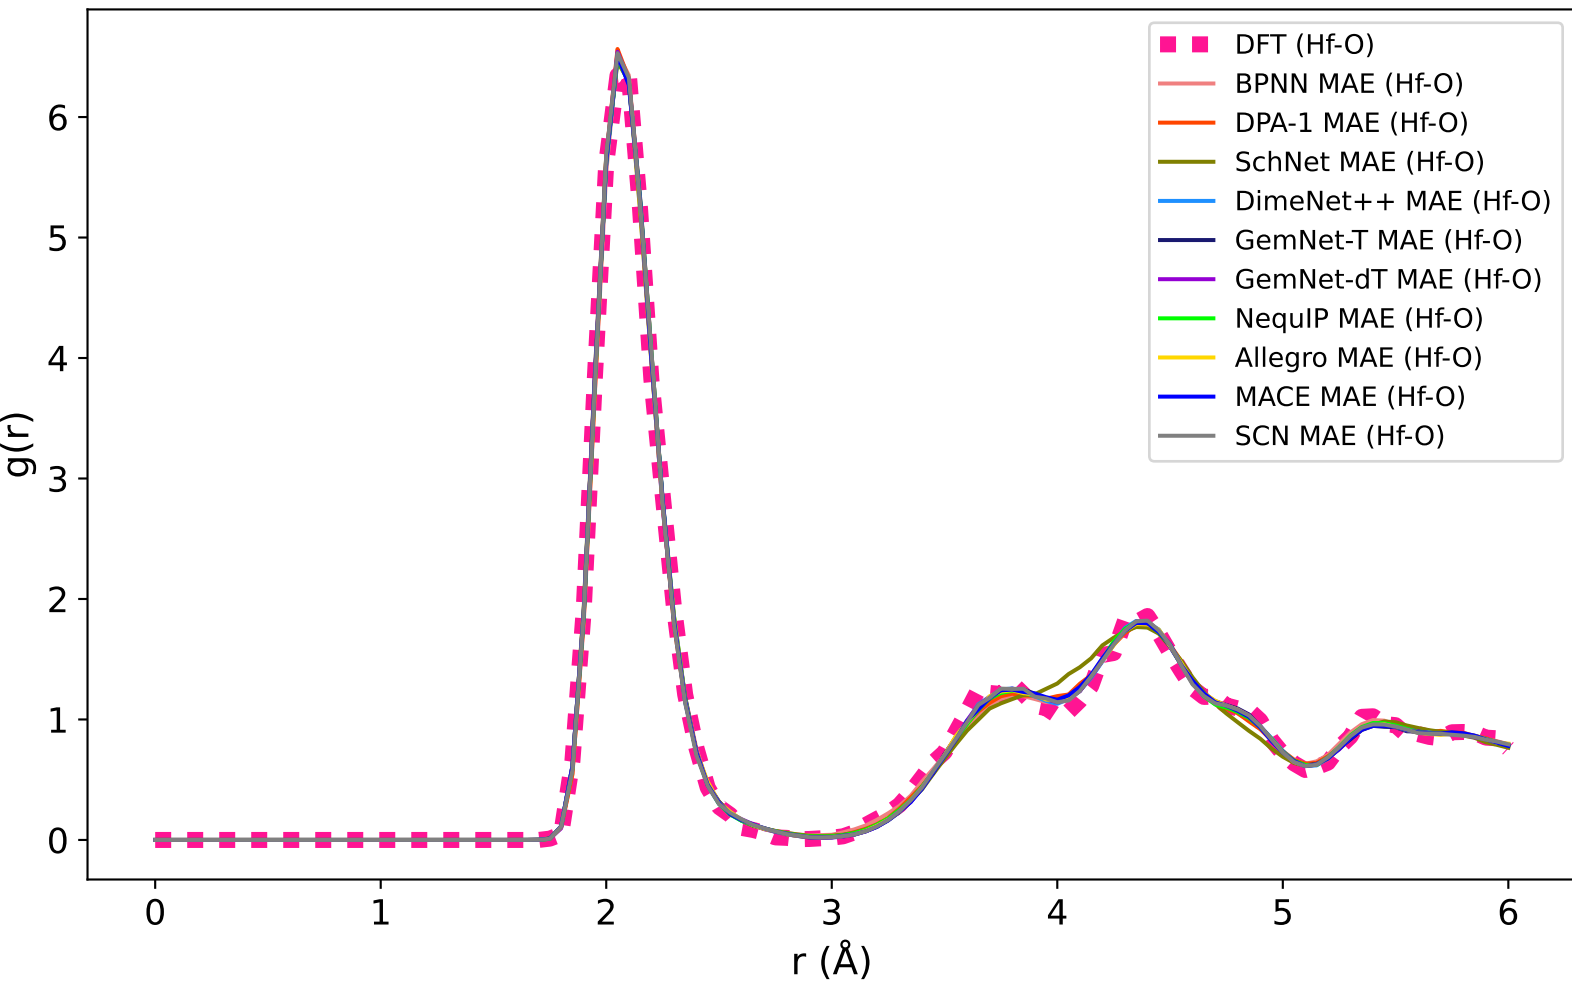

Supplement: supplementary_material [file attachment]
